# Supplementary material
Source: publisher figshare collection journal article supplement (https://acs.figshare.com/ndownloader/files/13293446)
Supplement: Supplementary file 1 [file 13293446]

## Sheet: PC9_AAL_Raw List 1
Query #:z	Protein Rank	Peptide < ProteinMetrics Confidential >	Glycans NHFAGNa	Modification Type(s)	Observed m/z	z	Observed (M+H)	Calc. mass (M+H)	Off-by-x error	Mass error (ppm)	Starting position	Cleavage	Score	Delta	Delta Mod	|Log Prob|	# of unique peptides	Protein Name	Protein DB number	Comment	Scan #	Scan Time
12651:4	1	K.YPIEHGIVTNWDDMEKIWHHTFYNELR.V			861.66	4	3443.62	3443.63	0	-2.7	69	Specific	638.14	447.77	447.77	8.92	31	>sp|P60709|ACTB_HUMAN Actin, cytoplasmic 1 OS=Homo sapiens GN=ACTB PE=1 SV=1	396	YJC_160818_PC9mem_AALmnp_G_01.10951.10951.4	controllerType=0 controllerNumber=1 scan=10951	70.3526
12653:4	1	K.YPIEHGIVTNWDDMEKIWHHTFYNELR.V			861.66	4	3443.62	3443.63	0	-2.7	69	Specific	1171.76	780.5	780.5	20.32	31	>sp|P60709|ACTB_HUMAN Actin, cytoplasmic 1 OS=Homo sapiens GN=ACTB PE=1 SV=1	396	YJC_160818_PC9mem_AALmnp_G_01.10952.10952.4	controllerType=0 controllerNumber=1 scan=10952	70.3552
05157:2	1	K.IWHHTFYNELR.V			758.376	2	1515.74	1515.75	0	-2.7	85	Specific	344.72	248.07	248.07	3.42	31	>sp|P60709|ACTB_HUMAN Actin, cytoplasmic 1 OS=Homo sapiens GN=ACTB PE=1 SV=1	396	YJC_160818_PC9mem_AALmnp_G_01.4929.4929.2	controllerType=0 controllerNumber=1 scan=4929	34.545
05155:2	1	K.IWHHTFYNELR.V			758.376	2	1515.74	1515.75	0	-2.7	85	Specific	460.88	283.08	283.08	4.59	31	>sp|P60709|ACTB_HUMAN Actin, cytoplasmic 1 OS=Homo sapiens GN=ACTB PE=1 SV=1	396	YJC_160818_PC9mem_AALmnp_G_01.4928.4928.2	controllerType=0 controllerNumber=1 scan=4928	34.5417
18979:4	1	R.EKMTQIMFETFNTPAMYVAIQAVLSLYASGR.T			878.438	4	3510.73	3510.75	0	-4.3	117	Specific	249.83	54.94	54.94	0.46	31	>sp|P60709|ACTB_HUMAN Actin, cytoplasmic 1 OS=Homo sapiens GN=ACTB PE=1 SV=1	396	YJC_160818_PC9mem_AALmnp_G_01.16783.16783.4	controllerType=0 controllerNumber=1 scan=16783	107.347
18981:4	1	R.EKMTQIMFETFNTPAMYVAIQAVLSLYASGR.T			878.438	4	3510.73	3510.75	0	-4.3	117	Specific	579.88	164.44	164.44	5.37	31	>sp|P60709|ACTB_HUMAN Actin, cytoplasmic 1 OS=Homo sapiens GN=ACTB PE=1 SV=1	396	YJC_160818_PC9mem_AALmnp_G_01.16784.16784.4	controllerType=0 controllerNumber=1 scan=16784	107.356
18976:3	1	R.EKMTQIMFETFNTPAMYVAIQAVLSLYASGR.T			1170.92	3	3510.75	3510.75	0	0.6	117	Specific	615.74	119.71	119.71	6.66	31	>sp|P60709|ACTB_HUMAN Actin, cytoplasmic 1 OS=Homo sapiens GN=ACTB PE=1 SV=1	396	YJC_160818_PC9mem_AALmnp_G_01.16780.16780.3	controllerType=0 controllerNumber=1 scan=16780	107.324
18978:3	1	R.EKMTQIMFETFNTPAMYVAIQAVLSLYASGR.T			1170.92	3	3510.75	3510.75	0	0.6	117	Specific	691.55	171.7	171.7	8.83	31	>sp|P60709|ACTB_HUMAN Actin, cytoplasmic 1 OS=Homo sapiens GN=ACTB PE=1 SV=1	396	YJC_160818_PC9mem_AALmnp_G_01.16781.16781.3	controllerType=0 controllerNumber=1 scan=16781	107.333
18277:4	1	R.EKMTQIM[+15.995]FETFNTPAMYVAIQAVLSLYASGR.T		M[+16]	882.439	4	3526.73	3526.74	0	-2.2	117	Specific	377.13	89.33	5.86	3.12	31	>sp|P60709|ACTB_HUMAN Actin, cytoplasmic 1 OS=Homo sapiens GN=ACTB PE=1 SV=1	396	YJC_160818_PC9mem_AALmnp_G_01.16143.16143.4	controllerType=0 controllerNumber=1 scan=16143	103.034
17885:3	1	R.EKM[+15.995]TQIMFETFNTPAMYVAIQAVLSLYASGR.T		M[+16]	1176.25	3	3526.73	3526.74	0	-3	117	Specific	506.54	73.69	1.05	3.41	31	>sp|P60709|ACTB_HUMAN Actin, cytoplasmic 1 OS=Homo sapiens GN=ACTB PE=1 SV=1	396	YJC_160818_PC9mem_AALmnp_G_01.15786.15786.3	controllerType=0 controllerNumber=1 scan=15786	100.707
18279:4	1	R.EKM[+15.995]TQIMFETFNTPAMYVAIQAVLSLYASGR.T		M[+16]	882.439	4	3526.73	3526.74	0	-2.2	117	Specific	685.98	209.55	61.73	8.75	31	>sp|P60709|ACTB_HUMAN Actin, cytoplasmic 1 OS=Homo sapiens GN=ACTB PE=1 SV=1	396	YJC_160818_PC9mem_AALmnp_G_01.16144.16144.4	controllerType=0 controllerNumber=1 scan=16144	103.037
17886:3	1	R.EKMTQIM[+15.995]FETFNTPAMYVAIQAVLSLYASGR.T		M[+16]	1176.25	3	3526.73	3526.74	0	-3	117	Specific	692.93	162.54	91.82	8.99	31	>sp|P60709|ACTB_HUMAN Actin, cytoplasmic 1 OS=Homo sapiens GN=ACTB PE=1 SV=1	396	YJC_160818_PC9mem_AALmnp_G_01.15787.15787.3	controllerType=0 controllerNumber=1 scan=15787	100.71
17996:4	1	R.EKMTQIMFETFNTPAMYVAIQAVLSLYASGRTTGIVMDSGDGVTHTVPIYEGYALPHAILR.L			1669.59	4	6675.33	6675.34	0	-2.2	117	Specific	241.84	241.84	40.45	4.71	31	>sp|P60709|ACTB_HUMAN Actin, cytoplasmic 1 OS=Homo sapiens GN=ACTB PE=1 SV=1	396	YJC_160818_PC9mem_AALmnp_G_01.15874.15874.4	controllerType=0 controllerNumber=1 scan=15874	101.215
17927:6	1	R.EKMTQIMFETFNTPAMYVAIQAVLSLYASGRTTGIVMDSGDGVTHTVPIYEGYALPHAILR.L			1113.4	6	6675.34	6675.34	0	-0.4	117	Specific	460.37	28.02	27.32	1.72	31	>sp|P60709|ACTB_HUMAN Actin, cytoplasmic 1 OS=Homo sapiens GN=ACTB PE=1 SV=1	396	YJC_160818_PC9mem_AALmnp_G_01.15826.15826.2	controllerType=0 controllerNumber=1 scan=15826	100.94
17937:5	1	R.EKMTQIMFETFNTPAMYVAIQAVLSLYASGRTTGIVMDSGDGVTHTVPIYEGYALPHAILR.L			1335.88	5	6675.35	6675.34	0	1.3	117	Specific	702.57	225.52	15.23	8.26	31	>sp|P60709|ACTB_HUMAN Actin, cytoplasmic 1 OS=Homo sapiens GN=ACTB PE=1 SV=1	396	YJC_160818_PC9mem_AALmnp_G_01.15835.15835.5	controllerType=0 controllerNumber=1 scan=15835	101.002
17994:4	1	R.EKMTQIMFETFNTPAMYVAIQAVLSLYASGRTTGIVMDSGDGVTHTVPIYEGYALPHAILR.L			1669.59	4	6675.33	6675.34	0	-2.2	117	Specific	851.99	394.71	25.86	13.88	31	>sp|P60709|ACTB_HUMAN Actin, cytoplasmic 1 OS=Homo sapiens GN=ACTB PE=1 SV=1	396	YJC_160818_PC9mem_AALmnp_G_01.15873.15873.4	controllerType=0 controllerNumber=1 scan=15873	101.212
17938:5	1	R.EKMTQIMFETFNTPAMYVAIQAVLSLYASGRTTGIVMDSGDGVTHTVPIYEGYALPHAILR.L			1335.88	5	6675.35	6675.34	0	1.3	117	Specific	1041.99	777.94	137.46	17.18	31	>sp|P60709|ACTB_HUMAN Actin, cytoplasmic 1 OS=Homo sapiens GN=ACTB PE=1 SV=1	396	YJC_160818_PC9mem_AALmnp_G_01.15836.15836.5	controllerType=0 controllerNumber=1 scan=15836	101.008
17060:5	1	R.EKMTQIM[+15.995]FETFNTPAMYVAIQAVLSLYASGRTTGIVMDSGDGVTHTVPIYEGYALPHAILR.L		M[+16]	1339.28	5	6692.36	6691.34	1	3	117	Specific	557.23	557.23	44.45	7.3	31	>sp|P60709|ACTB_HUMAN Actin, cytoplasmic 1 OS=Homo sapiens GN=ACTB PE=1 SV=1	396	YJC_160818_PC9mem_AALmnp_G_01.15034.15034.5	controllerType=0 controllerNumber=1 scan=15034	95.7705
17579:5	1	R.EKMTQIMFETFNTPAM[+15.995]YVAIQAVLSLYASGRTTGIVMDSGDGVTHTVPIYEGYALPHAILR.L		M[+16]	1339.07	5	6691.32	6691.34	0	-3.1	117	Specific	672.25	191.63	26.08	7.51	31	>sp|P60709|ACTB_HUMAN Actin, cytoplasmic 1 OS=Homo sapiens GN=ACTB PE=1 SV=1	396	YJC_160818_PC9mem_AALmnp_G_01.15515.15515.5	controllerType=0 controllerNumber=1 scan=15515	98.9074
17059:5	1	R.EKMTQIM[+15.995]FETFNTPAMYVAIQAVLSLYASGRTTGIVMDSGDGVTHTVPIYEGYALPHAILR.L		M[+16]	1339.28	5	6692.36	6691.34	1	3	117	Specific	761.49	761.49	0.37	11.47	31	>sp|P60709|ACTB_HUMAN Actin, cytoplasmic 1 OS=Homo sapiens GN=ACTB PE=1 SV=1	396	YJC_160818_PC9mem_AALmnp_G_01.15033.15033.5	controllerType=0 controllerNumber=1 scan=15033	95.7672
17581:5	1	R.EKMTQIMFETFNTPAMYVAIQAVLSLYASGRTTGIVM[+15.995]DSGDGVTHTVPIYEGYALPHAILR.L		M[+16]	1339.07	5	6691.32	6691.34	0	-3.1	117	Specific	871.26	485.87	77.72	14.51	31	>sp|P60709|ACTB_HUMAN Actin, cytoplasmic 1 OS=Homo sapiens GN=ACTB PE=1 SV=1	396	YJC_160818_PC9mem_AALmnp_G_01.15516.15516.5	controllerType=0 controllerNumber=1 scan=15516	98.9136
22587:3	1	K.MTQIMFETFNTPAMYVAIQAVLSLYASGR.T			1085.22	3	3253.63	3253.61	0	6.6	119	Specific	199.16	199.16	199.16	2.14	31	>sp|P60709|ACTB_HUMAN Actin, cytoplasmic 1 OS=Homo sapiens GN=ACTB PE=1 SV=1	396	YJC_160818_PC9mem_AALmnp_G_01.19949.19949.3	controllerType=0 controllerNumber=1 scan=19949	128.893
19650:2	1	K.MTQIMFETFNTPAMYVAIQAVLSLYASGR.T			1627.31	2	3253.61	3253.61	0	1.3	119	Specific	303.29	103.53	103.53	4.04	31	>sp|P60709|ACTB_HUMAN Actin, cytoplasmic 1 OS=Homo sapiens GN=ACTB PE=1 SV=1	396	YJC_160818_PC9mem_AALmnp_G_01.17375.17375.2	controllerType=0 controllerNumber=1 scan=17375	111.337
19633:4	1	K.MTQIMFETFNTPAMYVAIQAVLSLYASGR.T			814.156	4	3253.6	3253.61	0	-2	119	Specific	319.27	88.54	88.54	1.03	31	>sp|P60709|ACTB_HUMAN Actin, cytoplasmic 1 OS=Homo sapiens GN=ACTB PE=1 SV=1	396	YJC_160818_PC9mem_AALmnp_G_01.17364.17364.4	controllerType=0 controllerNumber=1 scan=17364	111.273
22585:3	1	K.MTQIMFETFNTPAMYVAIQAVLSLYASGR.T			1085.22	3	3253.63	3253.61	0	6.6	119	Specific	507.45	229.98	229.98	3.4	31	>sp|P60709|ACTB_HUMAN Actin, cytoplasmic 1 OS=Homo sapiens GN=ACTB PE=1 SV=1	396	YJC_160818_PC9mem_AALmnp_G_01.19948.19948.3	controllerType=0 controllerNumber=1 scan=19948	128.884
19594:3	1	K.MTQIMFETFNTPAMYVAIQAVLSLYASGR.T			1085.21	3	3253.61	3253.61	0	1.5	119	Specific	596.13	147.7	147.7	5.25	31	>sp|P60709|ACTB_HUMAN Actin, cytoplasmic 1 OS=Homo sapiens GN=ACTB PE=1 SV=1	396	YJC_160818_PC9mem_AALmnp_G_01.17328.17328.3	controllerType=0 controllerNumber=1 scan=17328	111.027
19635:4	1	K.MTQIMFETFNTPAMYVAIQAVLSLYASGR.T			814.156	4	3253.6	3253.61	0	-2	119	Specific	617.83	171.71	171.71	7.18	31	>sp|P60709|ACTB_HUMAN Actin, cytoplasmic 1 OS=Homo sapiens GN=ACTB PE=1 SV=1	396	YJC_160818_PC9mem_AALmnp_G_01.17365.17365.4	controllerType=0 controllerNumber=1 scan=17365	111.277
19649:2	1	K.MTQIMFETFNTPAMYVAIQAVLSLYASGR.T			1627.31	2	3253.61	3253.61	0	1.3	119	Specific	677.68	219.21	219.21	8.98	31	>sp|P60709|ACTB_HUMAN Actin, cytoplasmic 1 OS=Homo sapiens GN=ACTB PE=1 SV=1	396	YJC_160818_PC9mem_AALmnp_G_01.17374.17374.2	controllerType=0 controllerNumber=1 scan=17374	111.334
19596:3	1	K.MTQIMFETFNTPAMYVAIQAVLSLYASGR.T			1085.21	3	3253.61	3253.61	0	1.5	119	Specific	697.35	191.54	191.54	8.33	31	>sp|P60709|ACTB_HUMAN Actin, cytoplasmic 1 OS=Homo sapiens GN=ACTB PE=1 SV=1	396	YJC_160818_PC9mem_AALmnp_G_01.17329.17329.3	controllerType=0 controllerNumber=1 scan=17329	111.034
17222:3	1	K.MTQIMFETFN[+0.984]TPAM[+15.995]YVAIQAVLSLYASGR.T		M[+16], N[+1]	1090.88	3	3270.62	3270.59	0	8.3	119	Specific	406	160.21	12.45	2.41	31	>sp|P60709|ACTB_HUMAN Actin, cytoplasmic 1 OS=Homo sapiens GN=ACTB PE=1 SV=1	396	YJC_160818_PC9mem_AALmnp_G_01.15188.15188.3	controllerType=0 controllerNumber=1 scan=15188	96.8146
17224:3	1	K.MTQIMFETFN[+0.984]TPAM[+15.995]YVAIQAVLSLYASGR.T		M[+16], N[+1]	1090.88	3	3270.62	3270.59	0	8.3	119	Specific	452.47	433.37	31.03	6.04	31	>sp|P60709|ACTB_HUMAN Actin, cytoplasmic 1 OS=Homo sapiens GN=ACTB PE=1 SV=1	396	YJC_160818_PC9mem_AALmnp_G_01.15189.15189.3	controllerType=0 controllerNumber=1 scan=15189	96.8214
18176:4	1	K.MTQIMFETFNTPAMYVAIQAVLSLYASGRTTGIVMDSGDGVTHTVPIYEGYALPHAILR.L			1605.56	4	6419.2	6418.21	1	-1	119	Specific	306.68	240.81	26.37	4.91	31	>sp|P60709|ACTB_HUMAN Actin, cytoplasmic 1 OS=Homo sapiens GN=ACTB PE=1 SV=1	396	YJC_160818_PC9mem_AALmnp_G_01.16064.16064.4	controllerType=0 controllerNumber=1 scan=16064	102.533
18174:4	1	K.MTQIMFETFNTPAMYVAIQAVLSLYASGRTTGIVMDSGDGVTHTVPIYEGYALPHAILR.L			1605.56	4	6419.2	6418.21	1	-1	119	Specific	666.08	316.3	35.48	8.97	31	>sp|P60709|ACTB_HUMAN Actin, cytoplasmic 1 OS=Homo sapiens GN=ACTB PE=1 SV=1	396	YJC_160818_PC9mem_AALmnp_G_01.16063.16063.4	controllerType=0 controllerNumber=1 scan=16063	102.527
18215:7	1	K.MTQIMFETFNTPAMYVAIQAVLSLYASGRTTGIVMDSGDGVTHTVPIYEGYALPHAILR.L			917.748	7	6418.19	6418.21	0	-2	119	Specific	1470.16	742.1	15.15	25.93	31	>sp|P60709|ACTB_HUMAN Actin, cytoplasmic 1 OS=Homo sapiens GN=ACTB PE=1 SV=1	396	YJC_160818_PC9mem_AALmnp_G_01.16092.16092.7	controllerType=0 controllerNumber=1 scan=16092	102.699
16557:5	1	K.MTQIMFETFNTPAM[+15.995]YVAIQAVLSLYASGRTTGIVMDSGDGVTHTVPIYEGYALPHAILR.L		M[+16]	1287.85	5	6435.22	6434.2	1	2.7	119	Specific	598.73	135.39	41.38	5.08	31	>sp|P60709|ACTB_HUMAN Actin, cytoplasmic 1 OS=Homo sapiens GN=ACTB PE=1 SV=1	396	YJC_160818_PC9mem_AALmnp_G_01.14597.14597.5	controllerType=0 controllerNumber=1 scan=14597	92.9699
17641:5	1	K.MTQIM[+15.995]FETFNTPAMYVAIQAVLSLYASGRTTGIVMDSGDGVTHTVPIYEGYALPHAILR.L		M[+16]	1287.65	5	6434.2	6434.2	0	-0.4	119	Specific	704.89	269.4	20.2	9.94	31	>sp|P60709|ACTB_HUMAN Actin, cytoplasmic 1 OS=Homo sapiens GN=ACTB PE=1 SV=1	396	YJC_160818_PC9mem_AALmnp_G_01.15573.15573.5	controllerType=0 controllerNumber=1 scan=15573	99.3048
17642:5	1	K.MTQIM[+15.995]FETFNTPAMYVAIQAVLSLYASGRTTGIVMDSGDGVTHTVPIYEGYALPHAILR.L		M[+16]	1287.65	5	6434.2	6434.2	0	-0.4	119	Specific	824.09	824.09	46.29	13.77	31	>sp|P60709|ACTB_HUMAN Actin, cytoplasmic 1 OS=Homo sapiens GN=ACTB PE=1 SV=1	396	YJC_160818_PC9mem_AALmnp_G_01.15574.15574.5	controllerType=0 controllerNumber=1 scan=15574	99.3109
16558:5	1	K.MTQIMFETFNTPAM[+15.995]YVAIQAVLSLYASGRTTGIVMDSGDGVTHTVPIYEGYALPHAILR.L		M[+16]	1287.85	5	6435.22	6434.2	1	2.7	119	Specific	970.97	970.97	26.74	16.61	31	>sp|P60709|ACTB_HUMAN Actin, cytoplasmic 1 OS=Homo sapiens GN=ACTB PE=1 SV=1	396	YJC_160818_PC9mem_AALmnp_G_01.14598.14598.5	controllerType=0 controllerNumber=1 scan=14598	92.9733
10879:4	1	R.TTGIVMDSGDGVTHTVPIYEGYALPHAILR.L			796.657	4	3183.61	3183.61	0	-2.1	148	Specific	630.04	442.18	442.18	9.86	31	>sp|P60709|ACTB_HUMAN Actin, cytoplasmic 1 OS=Homo sapiens GN=ACTB PE=1 SV=1	396	YJC_160818_PC9mem_AALmnp_G_01.9422.9422.4	controllerType=0 controllerNumber=1 scan=9422	61.3531
10880:4	1	R.TTGIVMDSGDGVTHTVPIYEGYALPHAILR.L			796.657	4	3183.61	3183.61	0	-2.1	148	Specific	1066.72	1066.72	1066.72	18.86	31	>sp|P60709|ACTB_HUMAN Actin, cytoplasmic 1 OS=Homo sapiens GN=ACTB PE=1 SV=1	396	YJC_160818_PC9mem_AALmnp_G_01.9423.9423.4	controllerType=0 controllerNumber=1 scan=9423	61.3589
14205:3	1	R.DIKEKLC[+57.021]YVALDFEQEMATAASSSSLEK.S		C[+57]	1055.17	3	3163.51	3163.52	0	-3.8	211	Specific	752.91	466.12	466.12	11.85	31	>sp|P60709|ACTB_HUMAN Actin, cytoplasmic 1 OS=Homo sapiens GN=ACTB PE=1 SV=1	396	YJC_160818_PC9mem_AALmnp_G_01.12307.12307.3	controllerType=0 controllerNumber=1 scan=12307	78.6046
14207:3	1	R.DIKEKLC[+57.021]YVALDFEQEMATAASSSSLEK.S		C[+57]	1055.17	3	3163.51	3163.52	0	-3.8	211	Specific	850.79	754.32	754.32	14.47	31	>sp|P60709|ACTB_HUMAN Actin, cytoplasmic 1 OS=Homo sapiens GN=ACTB PE=1 SV=1	396	YJC_160818_PC9mem_AALmnp_G_01.12308.12308.3	controllerType=0 controllerNumber=1 scan=12308	78.6106
20421:3	1	K.LC[+57.021]YVALDFEQEMATAASSSSLEK.S		C[+57]	850.722	3	2550.15	2550.17	0	-8.2	216	Specific	320.7	199.62	199.62	2.32	31	>sp|P60709|ACTB_HUMAN Actin, cytoplasmic 1 OS=Homo sapiens GN=ACTB PE=1 SV=1	396	YJC_160818_PC9mem_AALmnp_G_01.18069.18069.3	controllerType=0 controllerNumber=1 scan=18069	116.147
20423:3	1	K.LC[+57.021]YVALDFEQEMATAASSSSLEK.S		C[+57]	850.722	3	2550.15	2550.17	0	-8.2	216	Specific	347.82	271.59	271.59	3.68	31	>sp|P60709|ACTB_HUMAN Actin, cytoplasmic 1 OS=Homo sapiens GN=ACTB PE=1 SV=1	396	YJC_160818_PC9mem_AALmnp_G_01.18070.18070.3	controllerType=0 controllerNumber=1 scan=18070	116.156
13983:3	1	K.LC[+57.021]YVALDFEQEMATAASSSSLEK.S		C[+57]	850.726	3	2550.16	2550.17	0	-3.8	216	Specific	389.57	262.05	262.05	3.51	31	>sp|P60709|ACTB_HUMAN Actin, cytoplasmic 1 OS=Homo sapiens GN=ACTB PE=1 SV=1	396	YJC_160818_PC9mem_AALmnp_G_01.12105.12105.3	controllerType=0 controllerNumber=1 scan=12105	77.3881
22612:3	1	K.LC[+57.021]YVALDFEQEMATAASSSSLEK.S		C[+57]	850.728	3	2550.17	2550.17	0	-1.9	216	Specific	424.95	424.95	424.95	5.92	31	>sp|P60709|ACTB_HUMAN Actin, cytoplasmic 1 OS=Homo sapiens GN=ACTB PE=1 SV=1	396	YJC_160818_PC9mem_AALmnp_G_01.19993.19993.3	controllerType=0 controllerNumber=1 scan=19993	129.244
22224:3	1	K.LC[+57.021]YVALDFEQEMATAASSSSLEK.S		C[+57]	850.732	3	2550.18	2550.17	0	3.4	216	Specific	474.25	342.56	342.56	4.52	31	>sp|P60709|ACTB_HUMAN Actin, cytoplasmic 1 OS=Homo sapiens GN=ACTB PE=1 SV=1	396	YJC_160818_PC9mem_AALmnp_G_01.19571.19571.3	controllerType=0 controllerNumber=1 scan=19571	126.212
22226:3	1	K.LC[+57.021]YVALDFEQEMATAASSSSLEK.S		C[+57]	850.732	3	2550.18	2550.17	0	3.4	216	Specific	540.82	515.91	515.91	7.04	31	>sp|P60709|ACTB_HUMAN Actin, cytoplasmic 1 OS=Homo sapiens GN=ACTB PE=1 SV=1	396	YJC_160818_PC9mem_AALmnp_G_01.19572.19572.3	controllerType=0 controllerNumber=1 scan=19572	126.22
13030:2	1	K.LC[+57.021]YVALDFEQEMATAASSSSLEK.S		C[+57]	1275.59	2	2550.17	2550.17	0	-3	216	Specific	559.36	429.2	429.2	7.59	31	>sp|P60709|ACTB_HUMAN Actin, cytoplasmic 1 OS=Homo sapiens GN=ACTB PE=1 SV=1	396	YJC_160818_PC9mem_AALmnp_G_01.11251.11251.2	controllerType=0 controllerNumber=1 scan=11251	72.1478
13419:3	1	K.LC[+57.021]YVALDFEQEMATAASSSSLEK.S		C[+57]	850.727	3	2550.17	2550.17	0	-2.7	216	Specific	563.58	394.28	394.28	6.84	31	>sp|P60709|ACTB_HUMAN Actin, cytoplasmic 1 OS=Homo sapiens GN=ACTB PE=1 SV=1	396	YJC_160818_PC9mem_AALmnp_G_01.11602.11602.3	controllerType=0 controllerNumber=1 scan=11602	74.3404
13985:3	1	K.LC[+57.021]YVALDFEQEMATAASSSSLEK.S		C[+57]	850.726	3	2550.16	2550.17	0	-3.8	216	Specific	630.94	554.17	554.17	9.32	31	>sp|P60709|ACTB_HUMAN Actin, cytoplasmic 1 OS=Homo sapiens GN=ACTB PE=1 SV=1	396	YJC_160818_PC9mem_AALmnp_G_01.12106.12106.3	controllerType=0 controllerNumber=1 scan=12106	77.391
22611:3	1	K.LC[+57.021]YVALDFEQEMATAASSSSLEK.S		C[+57]	850.728	3	2550.17	2550.17	0	-1.9	216	Specific	634.15	391.84	391.84	8.63	31	>sp|P60709|ACTB_HUMAN Actin, cytoplasmic 1 OS=Homo sapiens GN=ACTB PE=1 SV=1	396	YJC_160818_PC9mem_AALmnp_G_01.19992.19992.3	controllerType=0 controllerNumber=1 scan=19992	129.235
13421:3	1	K.LC[+57.021]YVALDFEQEMATAASSSSLEK.S		C[+57]	850.727	3	2550.17	2550.17	0	-2.7	216	Specific	638.82	559.14	559.14	9.02	31	>sp|P60709|ACTB_HUMAN Actin, cytoplasmic 1 OS=Homo sapiens GN=ACTB PE=1 SV=1	396	YJC_160818_PC9mem_AALmnp_G_01.11603.11603.3	controllerType=0 controllerNumber=1 scan=11603	74.3464
13028:2	1	K.LC[+57.021]YVALDFEQEMATAASSSSLEK.S		C[+57]	1275.59	2	2550.17	2550.17	0	-3	216	Specific	652.92	488.23	488.23	10.96	31	>sp|P60709|ACTB_HUMAN Actin, cytoplasmic 1 OS=Homo sapiens GN=ACTB PE=1 SV=1	396	YJC_160818_PC9mem_AALmnp_G_01.11250.11250.2	controllerType=0 controllerNumber=1 scan=11250	72.144
10135:3	1	K.LC[+57.021]YVALDFEQEM[+15.995]ATAASSSSLEK.S		C[+57], M[+16]	856.058	3	2566.16	2566.17	0	-3.6	216	Specific	602.91	470.63	470.63	8.66	31	>sp|P60709|ACTB_HUMAN Actin, cytoplasmic 1 OS=Homo sapiens GN=ACTB PE=1 SV=1	396	YJC_160818_PC9mem_AALmnp_G_01.8808.8808.3	controllerType=0 controllerNumber=1 scan=8808	57.7104
10137:3	1	K.LC[+57.021]YVALDFEQEM[+15.995]ATAASSSSLEK.S		C[+57], M[+16]	856.058	3	2566.16	2566.17	0	-3.6	216	Specific	604.45	566.61	566.61	9.32	31	>sp|P60709|ACTB_HUMAN Actin, cytoplasmic 1 OS=Homo sapiens GN=ACTB PE=1 SV=1	396	YJC_160818_PC9mem_AALmnp_G_01.8809.8809.3	controllerType=0 controllerNumber=1 scan=8809	57.7176
22694:3	1	K.LC[+57.021]YVALDFEQEMATAASSSSLEKSYELPDGQVITIGNER.F		C[+57]	1441.36	3	4322.07	4322.05	0	6.2	216	Specific	144.62	144.62	144.62	3.15	31	>sp|P60709|ACTB_HUMAN Actin, cytoplasmic 1 OS=Homo sapiens GN=ACTB PE=1 SV=1	396	YJC_160818_PC9mem_AALmnp_G_01.20878.20878.3	controllerType=0 controllerNumber=1 scan=20878	141.265
22693:3	1	K.LC[+57.021]YVALDFEQEMATAASSSSLEKSYELPDGQVITIGNER.F		C[+57]	1441.36	3	4322.07	4322.05	0	6.2	216	Specific	1029.18	510.71	510.71	17.11	31	>sp|P60709|ACTB_HUMAN Actin, cytoplasmic 1 OS=Homo sapiens GN=ACTB PE=1 SV=1	396	YJC_160818_PC9mem_AALmnp_G_01.20877.20877.3	controllerType=0 controllerNumber=1 scan=20877	141.26
12656:4	1	R.FRC[+57.021]PEALFQPSFLGMESC[+57.021]GIHETTFNSIMK.C		C[+57]*2	884.408	4	3534.61	3534.63	0	-5.9	255	Specific	454.83	228.21	228.21	4.3	31	>sp|P60709|ACTB_HUMAN Actin, cytoplasmic 1 OS=Homo sapiens GN=ACTB PE=1 SV=1	396	YJC_160818_PC9mem_AALmnp_G_01.10954.10954.4	controllerType=0 controllerNumber=1 scan=10954	70.3685
12658:4	1	R.FRC[+57.021]PEALFQPSFLGMESC[+57.021]GIHETTFNSIMK.C		C[+57]*2	884.408	4	3534.61	3534.63	0	-5.9	255	Specific	844.93	756.84	756.84	13.38	31	>sp|P60709|ACTB_HUMAN Actin, cytoplasmic 1 OS=Homo sapiens GN=ACTB PE=1 SV=1	396	YJC_160818_PC9mem_AALmnp_G_01.10955.10955.4	controllerType=0 controllerNumber=1 scan=10955	70.3746
11731:4	1	R.FRC[+57.021]PEALFQPSFLGMESC[+57.021]GIHETTFNSIM[+15.995]K.C		C[+57]*2, M[+16]	888.41	4	3550.62	3550.63	0	-1.8	255	Specific	589.05	486.46	232.04	8.78	31	>sp|P60709|ACTB_HUMAN Actin, cytoplasmic 1 OS=Homo sapiens GN=ACTB PE=1 SV=1	396	YJC_160818_PC9mem_AALmnp_G_01.10158.10158.4	controllerType=0 controllerNumber=1 scan=10158	65.4769
11732:4	1	R.FRC[+57.021]PEALFQPSFLGMESC[+57.021]GIHETTFNSIM[+15.995]K.C		C[+57]*2, M[+16]	888.41	4	3550.62	3550.63	0	-1.8	255	Specific	783.24	783.24	340.65	12.78	31	>sp|P60709|ACTB_HUMAN Actin, cytoplasmic 1 OS=Homo sapiens GN=ACTB PE=1 SV=1	396	YJC_160818_PC9mem_AALmnp_G_01.10159.10159.4	controllerType=0 controllerNumber=1 scan=10159	65.4826
12983:3	1	R.C[+57.021]PEALFQPSFLGMESC[+57.021]GIHETTFNSIMK.C		C[+57]*2	1077.82	3	3231.45	3231.46	0	-3.2	257	Specific	846.66	828.97	828.97	13.77	31	>sp|P60709|ACTB_HUMAN Actin, cytoplasmic 1 OS=Homo sapiens GN=ACTB PE=1 SV=1	396	YJC_160818_PC9mem_AALmnp_G_01.11210.11210.3	controllerType=0 controllerNumber=1 scan=11210	71.8943
12981:3	1	R.C[+57.021]PEALFQPSFLGMESC[+57.021]GIHETTFNSIMK.C		C[+57]*2	1077.82	3	3231.45	3231.46	0	-3.2	257	Specific	918.25	589.56	589.56	15.77	31	>sp|P60709|ACTB_HUMAN Actin, cytoplasmic 1 OS=Homo sapiens GN=ACTB PE=1 SV=1	396	YJC_160818_PC9mem_AALmnp_G_01.11209.11209.3	controllerType=0 controllerNumber=1 scan=11209	71.8883
10024:3	1	K.C[+57.021]DVDIRKDLYANTVLSGGTTMYPGIADR.M		C[+57]	1034.5	3	3101.5	3101.5	0	-1.5	285	Specific	600.2	343.71	343.71	8.06	31	>sp|P60709|ACTB_HUMAN Actin, cytoplasmic 1 OS=Homo sapiens GN=ACTB PE=1 SV=1	396	YJC_160818_PC9mem_AALmnp_G_01.8717.8717.3	controllerType=0 controllerNumber=1 scan=8717	57.1508
10026:3	1	K.C[+57.021]DVDIRKDLYANTVLSGGTTMYPGIADR.M		C[+57]	1034.5	3	3101.5	3101.5	0	-1.5	285	Specific	790.17	743.16	743.16	12.44	31	>sp|P60709|ACTB_HUMAN Actin, cytoplasmic 1 OS=Homo sapiens GN=ACTB PE=1 SV=1	396	YJC_160818_PC9mem_AALmnp_G_01.8718.8718.3	controllerType=0 controllerNumber=1 scan=8718	57.1545
09211:4	1	K.C[+57.021]DVDIRKDLYANTVLSGGTTM[+15.995]YPGIADR.M		C[+57], M[+16]	780.125	4	3117.48	3117.5	0	-5.8	285	Specific	266.45	91.41	91.41	1.63	31	>sp|P60709|ACTB_HUMAN Actin, cytoplasmic 1 OS=Homo sapiens GN=ACTB PE=1 SV=1	396	YJC_160818_PC9mem_AALmnp_G_01.8055.8055.4	controllerType=0 controllerNumber=1 scan=8055	53.2036
10405:4	1	K.C[+57.021]DVDIRKDLYAN[+0.984]TVLSGGTTMYPGIADR.M		C[+57], N[+1]	776.375	4	3102.48	3102.49	0	-2.7	285	Specific	294.19	172.2	172.2	3.55	31	>sp|P60709|ACTB_HUMAN Actin, cytoplasmic 1 OS=Homo sapiens GN=ACTB PE=1 SV=1	396	YJC_160818_PC9mem_AALmnp_G_01.9034.9034.4	controllerType=0 controllerNumber=1 scan=9034	59.1297
09213:4	1	K.C[+57.021]DVDIRKDLYANTVLSGGTTM[+15.995]YPGIADR.M		C[+57], M[+16]	780.125	4	3117.48	3117.5	0	-5.8	285	Specific	369.58	350.72	350.72	4.6	31	>sp|P60709|ACTB_HUMAN Actin, cytoplasmic 1 OS=Homo sapiens GN=ACTB PE=1 SV=1	396	YJC_160818_PC9mem_AALmnp_G_01.8056.8056.4	controllerType=0 controllerNumber=1 scan=8056	53.2062
10407:4	1	K.C[+57.021]DVDIRKDLYAN[+0.984]TVLSGGTTMYPGIADR.M		C[+57], N[+1]	776.375	4	3102.48	3102.49	0	-2.7	285	Specific	370.71	293.43	293.43	4.32	31	>sp|P60709|ACTB_HUMAN Actin, cytoplasmic 1 OS=Homo sapiens GN=ACTB PE=1 SV=1	396	YJC_160818_PC9mem_AALmnp_G_01.9035.9035.4	controllerType=0 controllerNumber=1 scan=9035	59.1329
09228:3	1	K.C[+57.021]DVDIRKDLYANTVLSGGTTM[+15.995]YPGIADR.M		C[+57], M[+16]	1039.83	3	3117.47	3117.5	0	-7.8	285	Specific	467.87	405.74	405.74	5.53	31	>sp|P60709|ACTB_HUMAN Actin, cytoplasmic 1 OS=Homo sapiens GN=ACTB PE=1 SV=1	396	YJC_160818_PC9mem_AALmnp_G_01.8065.8065.3	controllerType=0 controllerNumber=1 scan=8065	53.249
09226:3	1	K.C[+57.021]DVDIRKDLYANTVLSGGTTM[+15.995]YPGIADR.M		C[+57], M[+16]	1039.83	3	3117.47	3117.5	0	-7.8	285	Specific	499.26	212.45	212.45	3.49	31	>sp|P60709|ACTB_HUMAN Actin, cytoplasmic 1 OS=Homo sapiens GN=ACTB PE=1 SV=1	396	YJC_160818_PC9mem_AALmnp_G_01.8064.8064.3	controllerType=0 controllerNumber=1 scan=8064	53.2454
08833:3	1	R.KDLYANTVLSGGTTMYPGIADR.M			781.723	3	2343.16	2343.16	0	-4.1	291	Specific	520.15	347.78	347.78	5.84	31	>sp|P60709|ACTB_HUMAN Actin, cytoplasmic 1 OS=Homo sapiens GN=ACTB PE=1 SV=1	396	YJC_160818_PC9mem_AALmnp_G_01.7755.7755.3	controllerType=0 controllerNumber=1 scan=7755	51.4461
08835:3	1	R.KDLYANTVLSGGTTMYPGIADR.M			781.723	3	2343.16	2343.16	0	-4.1	291	Specific	654.64	618.88	618.88	10.69	31	>sp|P60709|ACTB_HUMAN Actin, cytoplasmic 1 OS=Homo sapiens GN=ACTB PE=1 SV=1	396	YJC_160818_PC9mem_AALmnp_G_01.7756.7756.3	controllerType=0 controllerNumber=1 scan=7756	51.45
16707:4	1	K.IIAPPERKYSVWIGGSILASLSTFQQMWISK.Q			877.474	4	3506.88	3506.89	0	-3.1	329	Specific	354.5	214.77	214.77	3.64	31	>sp|P60709|ACTB_HUMAN Actin, cytoplasmic 1 OS=Homo sapiens GN=ACTB PE=1 SV=1	396	YJC_160818_PC9mem_AALmnp_G_01.14741.14741.4	controllerType=0 controllerNumber=1 scan=14741	93.9043
16708:4	1	K.IIAPPERKYSVWIGGSILASLSTFQQMWISK.Q			877.474	4	3506.88	3506.89	0	-3.1	329	Specific	682.27	623.48	623.48	10.58	31	>sp|P60709|ACTB_HUMAN Actin, cytoplasmic 1 OS=Homo sapiens GN=ACTB PE=1 SV=1	396	YJC_160818_PC9mem_AALmnp_G_01.14742.14742.4	controllerType=0 controllerNumber=1 scan=14742	93.9102
18825:3	1	K.YSVWIGGSILASLSTFQQMWISK.Q			868.114	3	2602.33	2602.34	0	-3.6	337	Specific	556.44	299.1	299.1	5.68	31	>sp|P60709|ACTB_HUMAN Actin, cytoplasmic 1 OS=Homo sapiens GN=ACTB PE=1 SV=1	396	YJC_160818_PC9mem_AALmnp_G_01.16642.16642.3	controllerType=0 controllerNumber=1 scan=16642	106.374
18827:3	1	K.YSVWIGGSILASLSTFQQMWISK.Q			868.114	3	2602.33	2602.34	0	-3.6	337	Specific	690.27	612.13	612.13	10.32	31	>sp|P60709|ACTB_HUMAN Actin, cytoplasmic 1 OS=Homo sapiens GN=ACTB PE=1 SV=1	396	YJC_160818_PC9mem_AALmnp_G_01.16643.16643.3	controllerType=0 controllerNumber=1 scan=16643	106.38
16901:5	1	K.YSVWIGGSILASLSTFQQMWISKQEYDESGPSIVHR.K			820.809	5	4100.02	4100.02	0	-1.2	337	Specific	266.53	19.61	19.61	0.35	31	>sp|P60709|ACTB_HUMAN Actin, cytoplasmic 1 OS=Homo sapiens GN=ACTB PE=1 SV=1	396	YJC_160818_PC9mem_AALmnp_G_01.14909.14909.5	controllerType=0 controllerNumber=1 scan=14909	94.9988
22682:4	1	K.YSVWIGGSILASLSTFQQMWISKQEYDESGPSIVHR.K			1025.77	4	4100.05	4100.02	0	6.1	337	Specific	887.96	257.01	257.01	12.8	31	>sp|P60709|ACTB_HUMAN Actin, cytoplasmic 1 OS=Homo sapiens GN=ACTB PE=1 SV=1	396	YJC_160818_PC9mem_AALmnp_G_01.20867.20867.4	controllerType=0 controllerNumber=1 scan=20867	141.2
16883:3	1	K.YSVWIGGSILASLSTFQQMWISKQEYDESGPSIVHR.K			1367.34	3	4100.02	4100.02	0	-1.6	337	Specific	1044.8	284.34	193.08	16.22	31	>sp|P60709|ACTB_HUMAN Actin, cytoplasmic 1 OS=Homo sapiens GN=ACTB PE=1 SV=1	396	YJC_160818_PC9mem_AALmnp_G_01.14895.14895.3	controllerType=0 controllerNumber=1 scan=14895	94.9039
16881:3	1	K.YSVWIGGSILASLSTFQQMWISKQEYDESGPSIVHR.K			1367.34	3	4100.02	4100.02	0	-1.6	337	Specific	1052.44	212.93	97.42	16.96	31	>sp|P60709|ACTB_HUMAN Actin, cytoplasmic 1 OS=Homo sapiens GN=ACTB PE=1 SV=1	396	YJC_160818_PC9mem_AALmnp_G_01.14894.14894.3	controllerType=0 controllerNumber=1 scan=14894	94.898
16903:5	1	K.YSVWIGGSILASLSTFQQMWISKQEYDESGPSIVHR.K			820.809	5	4100.02	4100.02	0	-1.2	337	Specific	1393.03	418.46	218.65	24.14	31	>sp|P60709|ACTB_HUMAN Actin, cytoplasmic 1 OS=Homo sapiens GN=ACTB PE=1 SV=1	396	YJC_160818_PC9mem_AALmnp_G_01.14910.14910.5	controllerType=0 controllerNumber=1 scan=14910	95.0049
16165:5	1	K.YSVWIGGSILASLSTFQQMWISKQEYDESGPSIVHRK.C			846.428	5	4228.11	4228.12	0	-1.7	337	Specific	256.75	83.3	21.84	2.17	31	>sp|P60709|ACTB_HUMAN Actin, cytoplasmic 1 OS=Homo sapiens GN=ACTB PE=1 SV=1	396	YJC_160818_PC9mem_AALmnp_G_01.14216.14216.5	controllerType=0 controllerNumber=1 scan=14216	90.5428
16161:4	1	K.YSVWIGGSILASLSTFQQMWISKQEYDESGPSIVHRK.C			1057.78	4	4228.11	4228.12	0	-2.3	337	Specific	632.49	196.29	196.29	7.43	31	>sp|P60709|ACTB_HUMAN Actin, cytoplasmic 1 OS=Homo sapiens GN=ACTB PE=1 SV=1	396	YJC_160818_PC9mem_AALmnp_G_01.14213.14213.4	controllerType=0 controllerNumber=1 scan=14213	90.5266
16173:3	1	K.YSVWIGGSILASLSTFQQMWISKQEYDESGPSIVHRK.C			1410.04	3	4228.11	4228.12	0	-1.7	337	Specific	1060.31	302.81	203.38	16.9	31	>sp|P60709|ACTB_HUMAN Actin, cytoplasmic 1 OS=Homo sapiens GN=ACTB PE=1 SV=1	396	YJC_160818_PC9mem_AALmnp_G_01.14224.14224.3	controllerType=0 controllerNumber=1 scan=14224	90.5867
16174:3	1	K.YSVWIGGSILASLSTFQQMWISKQEYDESGPSIVHRK.C			1410.04	3	4228.11	4228.12	0	-1.7	337	Specific	1196.92	335.55	268.47	18.92	31	>sp|P60709|ACTB_HUMAN Actin, cytoplasmic 1 OS=Homo sapiens GN=ACTB PE=1 SV=1	396	YJC_160818_PC9mem_AALmnp_G_01.14225.14225.3	controllerType=0 controllerNumber=1 scan=14225	90.5929
16166:5	1	K.YSVWIGGSILASLSTFQQMWISKQEYDESGPSIVHRK.C			846.428	5	4228.11	4228.12	0	-1.7	337	Specific	1463.2	439.06	231.36	26.61	31	>sp|P60709|ACTB_HUMAN Actin, cytoplasmic 1 OS=Homo sapiens GN=ACTB PE=1 SV=1	396	YJC_160818_PC9mem_AALmnp_G_01.14217.14217.5	controllerType=0 controllerNumber=1 scan=14217	90.5486
16163:4	1	K.YSVWIGGSILASLSTFQQMWISKQEYDESGPSIVHRK.C			1057.78	4	4228.11	4228.12	0	-2.3	337	Specific	1528.88	421.38	363.1	27.47	31	>sp|P60709|ACTB_HUMAN Actin, cytoplasmic 1 OS=Homo sapiens GN=ACTB PE=1 SV=1	396	YJC_160818_PC9mem_AALmnp_G_01.14214.14214.4	controllerType=0 controllerNumber=1 scan=14214	90.5292
15478:5	1	K.YSVWIGGSILASLSTFQQM[+15.995]WISKQEYDESGPSIVHRK.C		M[+16]	849.426	5	4243.1	4244.11	-1	-2	337	Specific	1324.7	431.9	431.9	23.33	31	>sp|P60709|ACTB_HUMAN Actin, cytoplasmic 1 OS=Homo sapiens GN=ACTB PE=1 SV=1	396	YJC_160818_PC9mem_AALmnp_G_01.13570.13570.5	controllerType=0 controllerNumber=1 scan=13570	86.4549
12120:2	2	K.MSINAEEVVVGDLVEVK.G			915.976	2	1830.94	1830.95	0	-3.9	178	Specific	392.2	191.62	191.62	4.3	20	>sp|P05023|AT1A1_HUMAN Sodium/potassium-transporting ATPase subunit alpha-1 OS=Homo sapiens GN=ATP1A1 PE=1 SV=1	1266	YJC_160818_PC9mem_AALmnp_G_01.10462.10462.2	controllerType=0 controllerNumber=1 scan=10462	67.2685
12118:2	2	K.MSINAEEVVVGDLVEVK.G			915.976	2	1830.94	1830.95	0	-3.9	178	Specific	542.91	381.58	381.58	7.75	20	>sp|P05023|AT1A1_HUMAN Sodium/potassium-transporting ATPase subunit alpha-1 OS=Homo sapiens GN=ATP1A1 PE=1 SV=1	1266	YJC_160818_PC9mem_AALmnp_G_01.10461.10461.2	controllerType=0 controllerNumber=1 scan=10461	67.2649
08848:2	2	R.NIAFFSTNC[+57.021]VEGTAR.G		C[+57]	843.895	2	1686.78	1686.79	0	-4.5	241	Specific	453.54	296.76	296.76	5.13	20	>sp|P05023|AT1A1_HUMAN Sodium/potassium-transporting ATPase subunit alpha-1 OS=Homo sapiens GN=ATP1A1 PE=1 SV=1	1266	YJC_160818_PC9mem_AALmnp_G_01.7767.7767.2	controllerType=0 controllerNumber=1 scan=7767	51.5124
08846:2	2	R.NIAFFSTNC[+57.021]VEGTAR.G		C[+57]	843.895	2	1686.78	1686.79	0	-4.5	241	Specific	548.08	373.88	373.88	6.8	20	>sp|P05023|AT1A1_HUMAN Sodium/potassium-transporting ATPase subunit alpha-1 OS=Homo sapiens GN=ATP1A1 PE=1 SV=1	1266	YJC_160818_PC9mem_AALmnp_G_01.7766.7766.2	controllerType=0 controllerNumber=1 scan=7766	51.5086
07379:3	2	K.NLEAVETLGSTSTIC[+57.021]SDKTGTLTQNR.M		C[+57]	932.79	3	2796.36	2796.37	0	-4.2	360	Specific	833.26	291.69	291.69	12.54	20	>sp|P05023|AT1A1_HUMAN Sodium/potassium-transporting ATPase subunit alpha-1 OS=Homo sapiens GN=ATP1A1 PE=1 SV=1	1266	YJC_160818_PC9mem_AALmnp_G_01.6612.6612.3	controllerType=0 controllerNumber=1 scan=6612	44.7773
07380:3	2	K.NLEAVETLGSTSTIC[+57.021]SDKTGTLTQNR.M		C[+57]	932.79	3	2796.36	2796.37	0	-4.2	360	Specific	1083.97	478.37	478.37	18.75	20	>sp|P05023|AT1A1_HUMAN Sodium/potassium-transporting ATPase subunit alpha-1 OS=Homo sapiens GN=ATP1A1 PE=1 SV=1	1266	YJC_160818_PC9mem_AALmnp_G_01.6613.6613.3	controllerType=0 controllerNumber=1 scan=6613	44.7804
09251:4	2	R.MTVAHMWFDNQIHEADTTENQSGVSFDK.T			810.358	4	3238.41	3238.42	0	-3.2	386	Specific	234.15	114.83	114.83	2.73	20	>sp|P05023|AT1A1_HUMAN Sodium/potassium-transporting ATPase subunit alpha-1 OS=Homo sapiens GN=ATP1A1 PE=1 SV=1	1266	YJC_160818_PC9mem_AALmnp_G_01.8084.8084.4	controllerType=0 controllerNumber=1 scan=8084	53.3548
09253:4	2	R.MTVAHMWFDNQIHEADTTENQSGVSFDK.T			810.358	4	3238.41	3238.42	0	-3.2	386	Specific	725.68	671.63	671.63	11.77	20	>sp|P05023|AT1A1_HUMAN Sodium/potassium-transporting ATPase subunit alpha-1 OS=Homo sapiens GN=ATP1A1 PE=1 SV=1	1266	YJC_160818_PC9mem_AALmnp_G_01.8085.8085.4	controllerType=0 controllerNumber=1 scan=8085	53.3623
11938:4	2	R.MTVAHMWFDNQIHEADTTENQSGVSFDKTSATWLALSR.I			1082	4	4325	4325	0	-1.7	386	Specific	432.5	370.38	21.85	5.26	20	>sp|P05023|AT1A1_HUMAN Sodium/potassium-transporting ATPase subunit alpha-1 OS=Homo sapiens GN=ATP1A1 PE=1 SV=1	1266	YJC_160818_PC9mem_AALmnp_G_01.10309.10309.2	controllerType=0 controllerNumber=1 scan=10309	66.3371
11937:4	2	R.MTVAHMWFDNQIHEADTTENQSGVSFDKTSATWLALSR.I			1082	4	4325	4325	0	-1.7	386	Specific	811.03	482.39	38.78	13.05	20	>sp|P05023|AT1A1_HUMAN Sodium/potassium-transporting ATPase subunit alpha-1 OS=Homo sapiens GN=ATP1A1 PE=1 SV=1	1266	YJC_160818_PC9mem_AALmnp_G_01.10308.10308.2	controllerType=0 controllerNumber=1 scan=10308	66.33
11687:5	2	R.MTVAHMWFDNQIHEADTTENQSGVSFDKTSATWLALSR.I			865.804	5	4324.99	4325	0	-2.9	386	Specific	1001.69	1001.69	97.8	17.81	20	>sp|P05023|AT1A1_HUMAN Sodium/potassium-transporting ATPase subunit alpha-1 OS=Homo sapiens GN=ATP1A1 PE=1 SV=1	1266	YJC_160818_PC9mem_AALmnp_G_01.10095.10095.5	controllerType=0 controllerNumber=1 scan=10095	65.0448
23082:4	2	R.MTVAHMWFDNQIHEADTTENQSGVSFDKTSATWLALSR.I			1082.01	4	4325.03	4325	0	5.9	386	Specific	1072.3	1046.89	1046.89	17.96	20	>sp|P05023|AT1A1_HUMAN Sodium/potassium-transporting ATPase subunit alpha-1 OS=Homo sapiens GN=ATP1A1 PE=1 SV=1	1266	YJC_160818_PC9mem_AALmnp_G_01.21362.21362.4	controllerType=0 controllerNumber=1 scan=21362	145.355
11123:5	2	R.MTVAHM[+15.995]WFDNQIHEADTTENQSGVSFDKTSATWLALSR.I		M[+16]	868.802	5	4339.98	4341	-1	-2.8	386	Specific	403.74	128.06	11.55	3.38	20	>sp|P05023|AT1A1_HUMAN Sodium/potassium-transporting ATPase subunit alpha-1 OS=Homo sapiens GN=ATP1A1 PE=1 SV=1	1266	YJC_160818_PC9mem_AALmnp_G_01.9646.9646.5	controllerType=0 controllerNumber=1 scan=9646	62.6503
11685:5	2	R.MTVAHMWFDNQIHEADTTEN[+0.984]QSGVSFDKTSATWLALSR.I		N[+1]	865.804	5	4324.99	4325.99	-1	1.6	386	Specific	552.35	312.62	18.77	5.36	20	>sp|P05023|AT1A1_HUMAN Sodium/potassium-transporting ATPase subunit alpha-1 OS=Homo sapiens GN=ATP1A1 PE=1 SV=1	1266	YJC_160818_PC9mem_AALmnp_G_01.10094.10094.5	controllerType=0 controllerNumber=1 scan=10094	65.039
11125:5	2	R.M[+15.995]TVAHMWFDNQIHEADTTENQSGVSFDKTSATWLALSR.I		M[+16]	868.802	5	4339.98	4341	-1	-2.8	386	Specific	693.1	693.1	25.16	10.53	20	>sp|P05023|AT1A1_HUMAN Sodium/potassium-transporting ATPase subunit alpha-1 OS=Homo sapiens GN=ATP1A1 PE=1 SV=1	1266	YJC_160818_PC9mem_AALmnp_G_01.9647.9647.5	controllerType=0 controllerNumber=1 scan=9647	62.6528
11688:9	2	R.MTVAHMWFDNQIHEADTTEN[+2676.952]QSGVSFDKTSATWLALSRIAGLC[+57.021]NR.A	HexNAc(6)Hex(9)	C[+57], N[+2677]	866.16	9	7787.38	7786.36	1	2.6	386	Specific	206.06	206.06	50.82	1.47	20	>sp|P05023|AT1A1_HUMAN Sodium/potassium-transporting ATPase subunit alpha-1 OS=Homo sapiens GN=ATP1A1 PE=1 SV=1	1266	YJC_160818_PC9mem_AALmnp_G_01.10095.10095.5	controllerType=0 controllerNumber=1 scan=10095	65.0448
18563:4	2	R.VLGFC[+57.021]HLFLPDEQFPEGFQFDTDDVNFPIDNLC[+57.021]FVGLISMIDPPR.A		C[+57]*2	1318.63	4	5271.51	5271.49	0	2.4	552	Specific	600.79	510.15	25.46	8.85	20	>sp|P05023|AT1A1_HUMAN Sodium/potassium-transporting ATPase subunit alpha-1 OS=Homo sapiens GN=ATP1A1 PE=1 SV=1	1266	YJC_160818_PC9mem_AALmnp_G_01.16405.16405.4	controllerType=0 controllerNumber=1 scan=16405	104.795
18561:4	2	R.VLGFC[+57.021]HLFLPDEQFPEGFQFDTDDVNFPIDNLC[+57.021]FVGLISMIDPPR.A		C[+57]*2	1318.63	4	5271.51	5271.49	0	2.4	552	Specific	661.74	206.98	0.03	7.59	20	>sp|P05023|AT1A1_HUMAN Sodium/potassium-transporting ATPase subunit alpha-1 OS=Homo sapiens GN=ATP1A1 PE=1 SV=1	1266	YJC_160818_PC9mem_AALmnp_G_01.16404.16404.4	controllerType=0 controllerNumber=1 scan=16404	104.786
17976:4	2	R.VLGFC[+57.021]HLFLPDEQFPEGFQFDTDDVNFPIDNLC[+57.021]FVGLISMIDPPRAAVPDAVGK.C		C[+57]*2	1520.74	4	6079.93	6079.94	0	-1.5	552	Specific	169.45	169.45	20.14	3.39	20	>sp|P05023|AT1A1_HUMAN Sodium/potassium-transporting ATPase subunit alpha-1 OS=Homo sapiens GN=ATP1A1 PE=1 SV=1	1266	YJC_160818_PC9mem_AALmnp_G_01.15859.15859.2	controllerType=0 controllerNumber=1 scan=15859	101.131
17934:5	2	R.VLGFC[+57.021]HLFLPDEQFPEGFQFDTDDVNFPIDNLC[+57.021]FVGLISMIDPPRAAVPDAVGK.C		C[+57]*2	1216.8	5	6079.95	6079.94	0	2	552	Specific	790.56	372.44	43.15	10.48	20	>sp|P05023|AT1A1_HUMAN Sodium/potassium-transporting ATPase subunit alpha-1 OS=Homo sapiens GN=ATP1A1 PE=1 SV=1	1266	YJC_160818_PC9mem_AALmnp_G_01.15832.15832.5	controllerType=0 controllerNumber=1 scan=15832	100.981
17936:5	2	R.VLGFC[+57.021]HLFLPDEQFPEGFQFDTDDVNFPIDNLC[+57.021]FVGLISMIDPPRAAVPDAVGK.C		C[+57]*2	1216.8	5	6079.95	6079.94	0	2	552	Specific	946.06	943.02	61.32	14.65	20	>sp|P05023|AT1A1_HUMAN Sodium/potassium-transporting ATPase subunit alpha-1 OS=Homo sapiens GN=ATP1A1 PE=1 SV=1	1266	YJC_160818_PC9mem_AALmnp_G_01.15833.15833.5	controllerType=0 controllerNumber=1 scan=15833	100.988
17974:4	2	R.VLGFC[+57.021]HLFLPDEQFPEGFQFDTDDVNFPIDNLC[+57.021]FVGLISMIDPPRAAVPDAVGK.C		C[+57]*2	1520.74	4	6079.93	6079.94	0	-1.5	552	Specific	1002.8	608.36	50.63	17.49	20	>sp|P05023|AT1A1_HUMAN Sodium/potassium-transporting ATPase subunit alpha-1 OS=Homo sapiens GN=ATP1A1 PE=1 SV=1	1266	YJC_160818_PC9mem_AALmnp_G_01.15858.15858.2	controllerType=0 controllerNumber=1 scan=15858	101.128
09511:3	2	K.AC[+57.021]VVHGSDLKDMTSEQLDDILK.Y		C[+57]	825.401	3	2474.19	2474.19	0	-0.2	662	Specific	452.95	255.83	255.83	4.55	20	>sp|P05023|AT1A1_HUMAN Sodium/potassium-transporting ATPase subunit alpha-1 OS=Homo sapiens GN=ATP1A1 PE=1 SV=1	1266	YJC_160818_PC9mem_AALmnp_G_01.8310.8310.3	controllerType=0 controllerNumber=1 scan=8310	54.7837
09513:3	2	K.AC[+57.021]VVHGSDLKDMTSEQLDDILK.Y		C[+57]	825.401	3	2474.19	2474.19	0	-0.2	662	Specific	460.75	413.78	413.78	6.43	20	>sp|P05023|AT1A1_HUMAN Sodium/potassium-transporting ATPase subunit alpha-1 OS=Homo sapiens GN=ATP1A1 PE=1 SV=1	1266	YJC_160818_PC9mem_AALmnp_G_01.8311.8311.3	controllerType=0 controllerNumber=1 scan=8311	54.7914
11625:4	2	K.AC[+57.021]VVHGSDLKDMTSEQLDDILKYHTEIVFAR.T		C[+57]	898.444	4	3590.76	3590.76	0	-1.5	662	Specific	948.57	694.66	694.66	14.97	20	>sp|P05023|AT1A1_HUMAN Sodium/potassium-transporting ATPase subunit alpha-1 OS=Homo sapiens GN=ATP1A1 PE=1 SV=1	1266	YJC_160818_PC9mem_AALmnp_G_01.10034.10034.4	controllerType=0 controllerNumber=1 scan=10034	64.6729
11627:4	2	K.AC[+57.021]VVHGSDLKDMTSEQLDDILKYHTEIVFAR.T		C[+57]	898.444	4	3590.76	3590.76	0	-1.5	662	Specific	1319.9	1286.86	1286.86	22.97	20	>sp|P05023|AT1A1_HUMAN Sodium/potassium-transporting ATPase subunit alpha-1 OS=Homo sapiens GN=ATP1A1 PE=1 SV=1	1266	YJC_160818_PC9mem_AALmnp_G_01.10035.10035.4	controllerType=0 controllerNumber=1 scan=10035	64.6754
15059:3	2	K.QAADMILLDDNFASIVTGVEEGR.L			822.069	3	2464.19	2464.2	0	-4.5	744	Specific	150.53	117.46	117.46	0.52	20	>sp|P05023|AT1A1_HUMAN Sodium/potassium-transporting ATPase subunit alpha-1 OS=Homo sapiens GN=ATP1A1 PE=1 SV=1	1266	YJC_160818_PC9mem_AALmnp_G_01.13156.13156.3	controllerType=0 controllerNumber=1 scan=13156	83.8482
15057:3	2	K.QAADMILLDDNFASIVTGVEEGR.L			822.069	3	2464.19	2464.2	0	-4.5	744	Specific	296.74	166.39	166.39	3.08	20	>sp|P05023|AT1A1_HUMAN Sodium/potassium-transporting ATPase subunit alpha-1 OS=Homo sapiens GN=ATP1A1 PE=1 SV=1	1266	YJC_160818_PC9mem_AALmnp_G_01.13155.13155.3	controllerType=0 controllerNumber=1 scan=13155	83.8457
15064:2	2	K.QAADMILLDDNFASIVTGVEEGR.L			1232.6	2	2464.19	2464.2	0	-4.4	744	Specific	698.09	596.51	596.51	10.7	20	>sp|P05023|AT1A1_HUMAN Sodium/potassium-transporting ATPase subunit alpha-1 OS=Homo sapiens GN=ATP1A1 PE=1 SV=1	1266	YJC_160818_PC9mem_AALmnp_G_01.13160.13160.2	controllerType=0 controllerNumber=1 scan=13160	83.8751
15062:2	2	K.QAADMILLDDNFASIVTGVEEGR.L			1232.6	2	2464.19	2464.2	0	-4.4	744	Specific	740.64	556.51	556.51	11.7	20	>sp|P05023|AT1A1_HUMAN Sodium/potassium-transporting ATPase subunit alpha-1 OS=Homo sapiens GN=ATP1A1 PE=1 SV=1	1266	YJC_160818_PC9mem_AALmnp_G_01.13159.13159.2	controllerType=0 controllerNumber=1 scan=13159	83.8687
16331:4	2	K.QAADMILLDDNFASIVTGVEEGRLIFDNLKK.S			859.7	4	3435.78	3435.78	0	-0.9	744	Specific	548.04	368.54	368.54	6.12	20	>sp|P05023|AT1A1_HUMAN Sodium/potassium-transporting ATPase subunit alpha-1 OS=Homo sapiens GN=ATP1A1 PE=1 SV=1	1266	YJC_160818_PC9mem_AALmnp_G_01.14396.14396.4	controllerType=0 controllerNumber=1 scan=14396	91.7148
16333:4	2	K.QAADMILLDDNFASIVTGVEEGRLIFDNLKK.S			859.7	4	3435.78	3435.78	0	-0.9	744	Specific	1052.7	1038.51	1038.51	18.51	20	>sp|P05023|AT1A1_HUMAN Sodium/potassium-transporting ATPase subunit alpha-1 OS=Homo sapiens GN=ATP1A1 PE=1 SV=1	1266	YJC_160818_PC9mem_AALmnp_G_01.14397.14397.4	controllerType=0 controllerNumber=1 scan=14397	91.7206
22278:3	2	R.LISMAYGQIGMIQALGGFFTYFVILAENGFLPIHLLGLR.V			1428.77	3	4284.3	4284.31	0	-3	849	Specific	502.79	502.79	10.21	7.17	20	>sp|P05023|AT1A1_HUMAN Sodium/potassium-transporting ATPase subunit alpha-1 OS=Homo sapiens GN=ATP1A1 PE=1 SV=1	1266	YJC_160818_PC9mem_AALmnp_G_01.19614.19614.3	controllerType=0 controllerNumber=1 scan=19614	126.492
22265:4	2	R.LISMAYGQIGMIQALGGFFTYFVILAENGFLPIHLLGLR.V			1071.83	4	4284.31	4284.31	0	0.4	849	Specific	660.03	348.63	90.93	8.12	20	>sp|P05023|AT1A1_HUMAN Sodium/potassium-transporting ATPase subunit alpha-1 OS=Homo sapiens GN=ATP1A1 PE=1 SV=1	1266	YJC_160818_PC9mem_AALmnp_G_01.19605.19605.4	controllerType=0 controllerNumber=1 scan=19605	126.436
22266:4	2	R.LISMAYGQIGMIQALGGFFTYFVILAENGFLPIHLLGLR.V			1071.83	4	4284.31	4284.31	0	0.4	849	Specific	819.07	819.07	65.38	12.85	20	>sp|P05023|AT1A1_HUMAN Sodium/potassium-transporting ATPase subunit alpha-1 OS=Homo sapiens GN=ATP1A1 PE=1 SV=1	1266	YJC_160818_PC9mem_AALmnp_G_01.19606.19606.4	controllerType=0 controllerNumber=1 scan=19606	126.442
22276:3	2	R.LISMAYGQIGMIQALGGFFTYFVILAENGFLPIHLLGLR.V			1428.77	3	4284.3	4284.31	0	-3	849	Specific	1017.74	636.03	5.09	17.65	20	>sp|P05023|AT1A1_HUMAN Sodium/potassium-transporting ATPase subunit alpha-1 OS=Homo sapiens GN=ATP1A1 PE=1 SV=1	1266	YJC_160818_PC9mem_AALmnp_G_01.19613.19613.3	controllerType=0 controllerNumber=1 scan=19613	126.485
11989:3	2	R.VDWDDRWINDVEDSYGQQWTYEQR.K			1035.12	3	3103.35	3103.35	0	2.2	888	Specific	518.92	278.93	278.93	5.02	20	>sp|P05023|AT1A1_HUMAN Sodium/potassium-transporting ATPase subunit alpha-1 OS=Homo sapiens GN=ATP1A1 PE=1 SV=1	1266	YJC_160818_PC9mem_AALmnp_G_01.10356.10356.3	controllerType=0 controllerNumber=1 scan=10356	66.6382
11991:3	2	R.VDWDDRWINDVEDSYGQQWTYEQR.K			1035.12	3	3103.35	3103.35	0	2.2	888	Specific	600.7	493.03	493.03	9.27	20	>sp|P05023|AT1A1_HUMAN Sodium/potassium-transporting ATPase subunit alpha-1 OS=Homo sapiens GN=ATP1A1 PE=1 SV=1	1266	YJC_160818_PC9mem_AALmnp_G_01.10357.10357.3	controllerType=0 controllerNumber=1 scan=10357	66.6418
18303:4	2	R.NSVFQQGMKNKILIFGLFEETALAAFLSYC[+57.021]PGMGVALR.M		C[+57]	1056.04	4	4221.16	4221.17	0	-3.2	942	Specific	498.13	229.46	65.88	4.13	20	>sp|P05023|AT1A1_HUMAN Sodium/potassium-transporting ATPase subunit alpha-1 OS=Homo sapiens GN=ATP1A1 PE=1 SV=1	1266	YJC_160818_PC9mem_AALmnp_G_01.16167.16167.4	controllerType=0 controllerNumber=1 scan=16167	103.196
18323:3	2	R.NSVFQQGMKNKILIFGLFEETALAAFLSYC[+57.021]PGMGVALR.M		C[+57]	1407.72	3	4221.16	4221.17	0	-2.5	942	Specific	504.76	493.19	115.33	6.99	20	>sp|P05023|AT1A1_HUMAN Sodium/potassium-transporting ATPase subunit alpha-1 OS=Homo sapiens GN=ATP1A1 PE=1 SV=1	1266	YJC_160818_PC9mem_AALmnp_G_01.16184.16184.3	controllerType=0 controllerNumber=1 scan=16184	103.296
18321:3	2	R.NSVFQQGMKNKILIFGLFEETALAAFLSYC[+57.021]PGMGVALR.M		C[+57]	1407.72	3	4221.16	4221.17	0	-2.5	942	Specific	663.26	204.2	145.98	8.19	20	>sp|P05023|AT1A1_HUMAN Sodium/potassium-transporting ATPase subunit alpha-1 OS=Homo sapiens GN=ATP1A1 PE=1 SV=1	1266	YJC_160818_PC9mem_AALmnp_G_01.16183.16183.3	controllerType=0 controllerNumber=1 scan=16183	103.29
18304:4	2	R.NSVFQQGMKNKILIFGLFEETALAAFLSYC[+57.021]PGMGVALR.M		C[+57]	1056.04	4	4221.16	4221.17	0	-3.2	942	Specific	904.39	817.77	259.83	15.64	20	>sp|P05023|AT1A1_HUMAN Sodium/potassium-transporting ATPase subunit alpha-1 OS=Homo sapiens GN=ATP1A1 PE=1 SV=1	1266	YJC_160818_PC9mem_AALmnp_G_01.16168.16168.4	controllerType=0 controllerNumber=1 scan=16168	103.202
17779:4	2	R.NSVFQQGM[+15.995]KNKILIFGLFEETALAAFLSYC[+57.021]PGMGVALR.M		C[+57], M[+16]	1060.05	4	4237.17	4237.16	0	1.1	942	Specific	418.61	125.05	62.83	2.56	20	>sp|P05023|AT1A1_HUMAN Sodium/potassium-transporting ATPase subunit alpha-1 OS=Homo sapiens GN=ATP1A1 PE=1 SV=1	1266	YJC_160818_PC9mem_AALmnp_G_01.15699.15699.4	controllerType=0 controllerNumber=1 scan=15699	100.145
17781:4	2	R.NSVFQQGM[+15.995]KNKILIFGLFEETALAAFLSYC[+57.021]PGMGVALR.M		C[+57], M[+16]	1060.05	4	4237.17	4237.16	0	1.1	942	Specific	833.68	833.68	226.26	13.31	20	>sp|P05023|AT1A1_HUMAN Sodium/potassium-transporting ATPase subunit alpha-1 OS=Homo sapiens GN=ATP1A1 PE=1 SV=1	1266	YJC_160818_PC9mem_AALmnp_G_01.15700.15700.4	controllerType=0 controllerNumber=1 scan=15700	100.151
20469:3	2	K.ILIFGLFEETALAAFLSYC[+57.021]PGMGVALR.M		C[+57]	987.186	3	2959.54	2959.55	0	-1.1	953	Specific	409.88	171.71	171.71	3.31	20	>sp|P05023|AT1A1_HUMAN Sodium/potassium-transporting ATPase subunit alpha-1 OS=Homo sapiens GN=ATP1A1 PE=1 SV=1	1266	YJC_160818_PC9mem_AALmnp_G_01.18111.18111.3	controllerType=0 controllerNumber=1 scan=18111	116.443
20471:3	2	K.ILIFGLFEETALAAFLSYC[+57.021]PGMGVALR.M		C[+57]	987.186	3	2959.54	2959.55	0	-1.1	953	Specific	718.55	644.37	644.37	11.19	20	>sp|P05023|AT1A1_HUMAN Sodium/potassium-transporting ATPase subunit alpha-1 OS=Homo sapiens GN=ATP1A1 PE=1 SV=1	1266	YJC_160818_PC9mem_AALmnp_G_01.18112.18112.3	controllerType=0 controllerNumber=1 scan=18112	116.45
14193:2	3	K.VILGQ[+0.984]YNWLSYEDVFVR.A		Q[+1]	1051.52	2	2102.04	2102.06	0	-8	127	Specific	357.6	212.4	24.33	3.22	13	>sp|O95573|ACSL3_HUMAN Long-chain-fatty-acid--CoA ligase 3 OS=Homo sapiens GN=ACSL3 PE=1 SV=3	383	YJC_160818_PC9mem_AALmnp_G_01.12293.12293.4	controllerType=0 controllerNumber=1 scan=12293	78.5133
09523:2	3	K.GIIVHTMAAVEALGAK.A			790.943	2	1580.88	1580.88	0	-2.4	250	Specific	560.11	340	340	6.54	13	>sp|O95573|ACSL3_HUMAN Long-chain-fatty-acid--CoA ligase 3 OS=Homo sapiens GN=ACSL3 PE=1 SV=3	383	YJC_160818_PC9mem_AALmnp_G_01.8323.8323.2	controllerType=0 controllerNumber=1 scan=8323	54.8739
09525:2	3	K.GIIVHTMAAVEALGAK.A			790.943	2	1580.88	1580.88	0	-2.4	250	Specific	612.75	481	481	9.56	13	>sp|O95573|ACSL3_HUMAN Long-chain-fatty-acid--CoA ligase 3 OS=Homo sapiens GN=ACSL3 PE=1 SV=3	383	YJC_160818_PC9mem_AALmnp_G_01.8324.8324.2	controllerType=0 controllerNumber=1 scan=8324	54.8807
18142:6	3	K.ASMENQPHSKPLPSDIAVIMYTSGSTGLPKGVMISHSNIIAGITGMAERIPELGEEDVYIGYLPLAHVLELSAELVC[+57.021]LSHGC[+57.021]R.I		C[+57]*2	1488.92	6	8928.46	8927.47	1	-1.6	266	Specific	348.4	348.4	23.73	5.36	13	>sp|O95573|ACSL3_HUMAN Long-chain-fatty-acid--CoA ligase 3 OS=Homo sapiens GN=ACSL3 PE=1 SV=3	383	YJC_160818_PC9mem_AALmnp_G_01.16030.16030.3	controllerType=0 controllerNumber=1 scan=16030	102.306
18141:6	3	K.ASMENQPHSKPLPSDIAVIMYTSGSTGLPKGVMISHSNIIAGITGMAERIPELGEEDVYIGYLPLAHVLELSAELVC[+57.021]LSHGC[+57.021]R.I		C[+57]*2	1488.92	6	8928.46	8927.47	1	-1.6	266	Specific	930.31	448.31	15.65	15.01	13	>sp|O95573|ACSL3_HUMAN Long-chain-fatty-acid--CoA ligase 3 OS=Homo sapiens GN=ACSL3 PE=1 SV=3	383	YJC_160818_PC9mem_AALmnp_G_01.16029.16029.3	controllerType=0 controllerNumber=1 scan=16029	102.299
18767:6	3	K.GVMISHSNIIAGITGMAERIPELGEEDVYIGYLPLAHVLELSAELVC[+57.021]LSHGC[+57.021]R.I		C[+57]*2	965.825	6	5789.91	5789.92	0	-0.6	296	Specific	376.01	28.52	28.52	0.93	13	>sp|O95573|ACSL3_HUMAN Long-chain-fatty-acid--CoA ligase 3 OS=Homo sapiens GN=ACSL3 PE=1 SV=3	383	YJC_160818_PC9mem_AALmnp_G_01.16583.16583.6	controllerType=0 controllerNumber=1 scan=16583	105.978
18804:4	3	K.GVMISHSNIIAGITGMAERIPELGEEDVYIGYLPLAHVLELSAELVC[+57.021]LSHGC[+57.021]R.I		C[+57]*2	1448.23	4	5789.9	5789.92	0	-2.2	296	Specific	867.67	867.67	239.29	14.03	13	>sp|O95573|ACSL3_HUMAN Long-chain-fatty-acid--CoA ligase 3 OS=Homo sapiens GN=ACSL3 PE=1 SV=3	383	YJC_160818_PC9mem_AALmnp_G_01.16618.16618.4	controllerType=0 controllerNumber=1 scan=16618	106.21
18778:5	3	K.GVMISHSNIIAGITGMAERIPELGEEDVYIGYLPLAHVLELSAELVC[+57.021]LSHGC[+57.021]R.I		C[+57]*2	1158.99	5	5790.9	5789.92	1	-3.2	296	Specific	873.16	532.25	85.88	14.26	13	>sp|O95573|ACSL3_HUMAN Long-chain-fatty-acid--CoA ligase 3 OS=Homo sapiens GN=ACSL3 PE=1 SV=3	383	YJC_160818_PC9mem_AALmnp_G_01.16590.16590.5	controllerType=0 controllerNumber=1 scan=16590	106.019
18780:5	3	K.GVMISHSNIIAGITGMAERIPELGEEDVYIGYLPLAHVLELSAELVC[+57.021]LSHGC[+57.021]R.I		C[+57]*2	1158.99	5	5790.9	5789.92	1	-3.2	296	Specific	1075.23	1039.42	319.2	18.26	13	>sp|O95573|ACSL3_HUMAN Long-chain-fatty-acid--CoA ligase 3 OS=Homo sapiens GN=ACSL3 PE=1 SV=3	383	YJC_160818_PC9mem_AALmnp_G_01.16591.16591.5	controllerType=0 controllerNumber=1 scan=16591	106.023
18803:4	3	K.GVMISHSNIIAGITGMAERIPELGEEDVYIGYLPLAHVLELSAELVC[+57.021]LSHGC[+57.021]R.I		C[+57]*2	1448.23	4	5789.9	5789.92	0	-2.2	296	Specific	1094.33	653.51	172.73	18.03	13	>sp|O95573|ACSL3_HUMAN Long-chain-fatty-acid--CoA ligase 3 OS=Homo sapiens GN=ACSL3 PE=1 SV=3	383	YJC_160818_PC9mem_AALmnp_G_01.16617.16617.4	controllerType=0 controllerNumber=1 scan=16617	106.203
18769:6	3	K.GVMISHSNIIAGITGMAERIPELGEEDVYIGYLPLAHVLELSAELVC[+57.021]LSHGC[+57.021]R.I		C[+57]*2	965.825	6	5789.91	5789.92	0	-0.6	296	Specific	1195.56	1062.32	368.91	20.45	13	>sp|O95573|ACSL3_HUMAN Long-chain-fatty-acid--CoA ligase 3 OS=Homo sapiens GN=ACSL3 PE=1 SV=3	383	YJC_160818_PC9mem_AALmnp_G_01.16584.16584.6	controllerType=0 controllerNumber=1 scan=16584	105.984
18665:5	3	K.GVM[+15.995]ISHSNIIAGITGMAERIPELGEEDVYIGYLPLAHVLELSAELVC[+57.021]LSHGC[+57.021]R.I		C[+57]*2, M[+16]	1161.79	5	5804.91	5805.91	-1	-0.3	296	Specific	760.36	366.39	46.97	10.74	13	>sp|O95573|ACSL3_HUMAN Long-chain-fatty-acid--CoA ligase 3 OS=Homo sapiens GN=ACSL3 PE=1 SV=3	383	YJC_160818_PC9mem_AALmnp_G_01.16501.16501.5	controllerType=0 controllerNumber=1 scan=16501	105.449
18667:5	3	K.GVM[+15.995]ISHSNIIAGITGMAERIPELGEEDVYIGYLPLAHVLELSAELVC[+57.021]LSHGC[+57.021]R.I		C[+57]*2, M[+16]	1161.79	5	5804.91	5805.91	-1	-0.3	296	Specific	1143.21	1107.11	117.62	18.91	13	>sp|O95573|ACSL3_HUMAN Long-chain-fatty-acid--CoA ligase 3 OS=Homo sapiens GN=ACSL3 PE=1 SV=3	383	YJC_160818_PC9mem_AALmnp_G_01.16502.16502.5	controllerType=0 controllerNumber=1 scan=16502	105.452
18666:5	3	K.GVMISHSN[+0.984]IIAGITGM[+15.995]AERIPELGEEDVYIGYLPLAHVLELSAELVC[+57.021]LSHGC[+57.021]R.I		C[+57]*2, M[+16], N[+1]	1162.39	5	5807.9	5806.9	1	0.5	296	Specific	594.12	232.73	2.17	5.79	13	>sp|O95573|ACSL3_HUMAN Long-chain-fatty-acid--CoA ligase 3 OS=Homo sapiens GN=ACSL3 PE=1 SV=3	383	YJC_160818_PC9mem_AALmnp_G_01.16501.16501.5	controllerType=0 controllerNumber=1 scan=16501	105.449
18668:5	3	K.GVM[+15.995]ISHSN[+0.984]IIAGITGMAERIPELGEEDVYIGYLPLAHVLELSAELVC[+57.021]LSHGC[+57.021]R.I		C[+57]*2, M[+16], N[+1]	1162.39	5	5807.9	5806.9	1	0.5	296	Specific	751.87	705.98	71.68	12.1	13	>sp|O95573|ACSL3_HUMAN Long-chain-fatty-acid--CoA ligase 3 OS=Homo sapiens GN=ACSL3 PE=1 SV=3	383	YJC_160818_PC9mem_AALmnp_G_01.16502.16502.5	controllerType=0 controllerNumber=1 scan=16502	105.452
18296:6	3	K.GVMISHSNIIAGITGMAERIPELGEEDVYIGYLPLAHVLELSAELVC[+57.021]LSHGC[+57.021]RIGYSSPQTLADQSSK.I		C[+57]*2	1226.45	6	7353.64	7352.67	1	-4.6	296	Specific	768.79	342.81	95.17	10.82	13	>sp|O95573|ACSL3_HUMAN Long-chain-fatty-acid--CoA ligase 3 OS=Homo sapiens GN=ACSL3 PE=1 SV=3	383	YJC_160818_PC9mem_AALmnp_G_01.16157.16157.6	controllerType=0 controllerNumber=1 scan=16157	103.124
18340:5	3	K.GVMISHSNIIAGITGMAERIPELGEEDVYIGYLPLAHVLELSAELVC[+57.021]LSHGC[+57.021]RIGYSSPQTLADQSSK.I		C[+57]*2	1471.13	5	7351.63	7352.67	-1	-4.9	296	Specific	893.53	418.68	418.68	13.14	13	>sp|O95573|ACSL3_HUMAN Long-chain-fatty-acid--CoA ligase 3 OS=Homo sapiens GN=ACSL3 PE=1 SV=3	383	YJC_160818_PC9mem_AALmnp_G_01.16203.16203.5	controllerType=0 controllerNumber=1 scan=16203	103.418
18298:6	3	K.GVMISHSNIIAGITGMAERIPELGEEDVYIGYLPLAHVLELSAELVC[+57.021]LSHGC[+57.021]RIGYSSPQTLADQSSK.I		C[+57]*2	1226.45	6	7353.64	7352.67	1	-4.6	296	Specific	1460.74	1428.08	347.68	26.36	13	>sp|O95573|ACSL3_HUMAN Long-chain-fatty-acid--CoA ligase 3 OS=Homo sapiens GN=ACSL3 PE=1 SV=3	383	YJC_160818_PC9mem_AALmnp_G_01.16158.16158.6	controllerType=0 controllerNumber=1 scan=16158	103.13
17925:3	3	R.IPELGEEDVYIGYLPLAHVLELSAELVC[+57.021]LSHGC[+57.021]R.I		C[+57]*2	1284.65	3	3851.93	3851.93	0	-0.3	315	Specific	712.01	645.15	645.15	11.28	13	>sp|O95573|ACSL3_HUMAN Long-chain-fatty-acid--CoA ligase 3 OS=Homo sapiens GN=ACSL3 PE=1 SV=3	383	YJC_160818_PC9mem_AALmnp_G_01.15824.15824.3	controllerType=0 controllerNumber=1 scan=15824	100.925
17917:4	3	R.IPELGEEDVYIGYLPLAHVLELSAELVC[+57.021]LSHGC[+57.021]R.I		C[+57]*2	963.737	4	3851.93	3851.93	0	-1.6	315	Specific	890.56	696.7	696.7	14.59	13	>sp|O95573|ACSL3_HUMAN Long-chain-fatty-acid--CoA ligase 3 OS=Homo sapiens GN=ACSL3 PE=1 SV=3	383	YJC_160818_PC9mem_AALmnp_G_01.15817.15817.4	controllerType=0 controllerNumber=1 scan=15817	100.886
17923:3	3	R.IPELGEEDVYIGYLPLAHVLELSAELVC[+57.021]LSHGC[+57.021]R.I		C[+57]*2	1284.65	3	3851.93	3851.93	0	-0.3	315	Specific	996.71	615.24	615.24	16.28	13	>sp|O95573|ACSL3_HUMAN Long-chain-fatty-acid--CoA ligase 3 OS=Homo sapiens GN=ACSL3 PE=1 SV=3	383	YJC_160818_PC9mem_AALmnp_G_01.15823.15823.3	controllerType=0 controllerNumber=1 scan=15823	100.918
17918:4	3	R.IPELGEEDVYIGYLPLAHVLELSAELVC[+57.021]LSHGC[+57.021]R.I		C[+57]*2	963.737	4	3851.93	3851.93	0	-1.6	315	Specific	1341.72	1341.72	1341.72	23.59	13	>sp|O95573|ACSL3_HUMAN Long-chain-fatty-acid--CoA ligase 3 OS=Homo sapiens GN=ACSL3 PE=1 SV=3	383	YJC_160818_PC9mem_AALmnp_G_01.15818.15818.4	controllerType=0 controllerNumber=1 scan=15818	100.891
17130:5	3	R.IPELGEEDVYIGYLPLAHVLELSAELVC[+57.021]LSHGC[+57.021]RIGYSSPQTLADQSSK.I		C[+57]*2	1083.75	5	5414.72	5414.69	0	4.4	315	Specific	642.35	289.27	119.97	7.45	13	>sp|O95573|ACSL3_HUMAN Long-chain-fatty-acid--CoA ligase 3 OS=Homo sapiens GN=ACSL3 PE=1 SV=3	383	YJC_160818_PC9mem_AALmnp_G_01.15114.15114.5	controllerType=0 controllerNumber=1 scan=15114	96.3256
17142:4	3	R.IPELGEEDVYIGYLPLAHVLELSAELVC[+57.021]LSHGC[+57.021]RIGYSSPQTLADQSSK.I		C[+57]*2	1354.18	4	5413.7	5414.69	-1	2.9	315	Specific	816.81	351.94	351.94	11.3	13	>sp|O95573|ACSL3_HUMAN Long-chain-fatty-acid--CoA ligase 3 OS=Homo sapiens GN=ACSL3 PE=1 SV=3	383	YJC_160818_PC9mem_AALmnp_G_01.15128.15128.2	controllerType=0 controllerNumber=1 scan=15128	96.4204
17132:5	3	R.IPELGEEDVYIGYLPLAHVLELSAELVC[+57.021]LSHGC[+57.021]RIGYSSPQTLADQSSK.I		C[+57]*2	1083.75	5	5414.72	5414.69	0	4.4	315	Specific	1120.94	1105.2	299.26	19.28	13	>sp|O95573|ACSL3_HUMAN Long-chain-fatty-acid--CoA ligase 3 OS=Homo sapiens GN=ACSL3 PE=1 SV=3	383	YJC_160818_PC9mem_AALmnp_G_01.15115.15115.5	controllerType=0 controllerNumber=1 scan=15115	96.3316
12368:4	3	K.VSEMSSFQRNLFILAYNYKMEQISK.G			757.38	4	3026.5	3026.51	0	-4.3	398	Specific	925.28	816.39	816.39	15.67	13	>sp|O95573|ACSL3_HUMAN Long-chain-fatty-acid--CoA ligase 3 OS=Homo sapiens GN=ACSL3 PE=1 SV=3	383	YJC_160818_PC9mem_AALmnp_G_01.10688.10688.4	controllerType=0 controllerNumber=1 scan=10688	68.6824
14716:3	3	K.NLPLVDNIC[+57.021]AYANSYHSYVIGFVVPNQKELTELAR.K		C[+57]	1336.69	3	4008.04	4008.03	0	2.6	603	Specific	947.31	922.01	52.46	15.21	13	>sp|O95573|ACSL3_HUMAN Long-chain-fatty-acid--CoA ligase 3 OS=Homo sapiens GN=ACSL3 PE=1 SV=3	383	YJC_160818_PC9mem_AALmnp_G_01.12843.12843.3	controllerType=0 controllerNumber=1 scan=12843	81.9267
14715:3	3	K.NLPLVDNIC[+57.021]AYANSYHSYVIGFVVPNQKELTELAR.K		C[+57]	1336.69	3	4008.04	4008.03	0	2.6	603	Specific	963.64	542.59	81.18	16.21	13	>sp|O95573|ACSL3_HUMAN Long-chain-fatty-acid--CoA ligase 3 OS=Homo sapiens GN=ACSL3 PE=1 SV=3	383	YJC_160818_PC9mem_AALmnp_G_01.12842.12842.3	controllerType=0 controllerNumber=1 scan=12842	81.9201
09620:3	3	K.GLKGTWEELC[+57.021]NSC[+57.021]EMENEVLK.V		C[+57]*2	842.712	3	2526.12	2526.13	0	-3.8	640	Specific	569.28	481.72	481.72	7.98	13	>sp|O95573|ACSL3_HUMAN Long-chain-fatty-acid--CoA ligase 3 OS=Homo sapiens GN=ACSL3 PE=1 SV=3	383	YJC_160818_PC9mem_AALmnp_G_01.8390.8390.3	controllerType=0 controllerNumber=1 scan=8390	55.2069
09618:3	3	K.GLKGTWEELC[+57.021]NSC[+57.021]EMENEVLK.V		C[+57]*2	842.712	3	2526.12	2526.13	0	-3.8	640	Specific	620.2	447.74	447.74	9.27	13	>sp|O95573|ACSL3_HUMAN Long-chain-fatty-acid--CoA ligase 3 OS=Homo sapiens GN=ACSL3 PE=1 SV=3	383	YJC_160818_PC9mem_AALmnp_G_01.8389.8389.3	controllerType=0 controllerNumber=1 scan=8389	55.2042
12742:3	4	K.VTYKAPVPTGEVYFADSFDRGTLSGWILSK.A			1102.23	3	3304.68	3304.69	0	-1.8	58	Specific	777.7	777.7	777.7	12.44	17	>sp|P27824|CALX_HUMAN Calnexin OS=Homo sapiens GN=CANX PE=1 SV=2	2082	YJC_160818_PC9mem_AALmnp_G_01.11018.11018.3	controllerType=0 controllerNumber=1 scan=11018	70.7352
12807:4	4	K.VTYKAPVPTGEVYFADSFDRGTLSGWILSK.A			826.925	4	3304.68	3304.69	0	-3.3	58	Specific	791.69	623.86	623.86	12.73	17	>sp|P27824|CALX_HUMAN Calnexin OS=Homo sapiens GN=CANX PE=1 SV=2	2082	YJC_160818_PC9mem_AALmnp_G_01.11069.11069.4	controllerType=0 controllerNumber=1 scan=11069	71.0361
12741:3	4	K.VTYKAPVPTGEVYFADSFDRGTLSGWILSK.A			1102.23	3	3304.68	3304.69	0	-1.8	58	Specific	801.37	557.43	557.43	13.44	17	>sp|P27824|CALX_HUMAN Calnexin OS=Homo sapiens GN=CANX PE=1 SV=2	2082	YJC_160818_PC9mem_AALmnp_G_01.11017.11017.3	controllerType=0 controllerNumber=1 scan=11017	70.7294
12808:4	4	K.VTYKAPVPTGEVYFADSFDRGTLSGWILSK.A			826.925	4	3304.68	3304.69	0	-3.3	58	Specific	993.16	993.16	993.16	16.73	17	>sp|P27824|CALX_HUMAN Calnexin OS=Homo sapiens GN=CANX PE=1 SV=2	2082	YJC_160818_PC9mem_AALmnp_G_01.11070.11070.4	controllerType=0 controllerNumber=1 scan=11070	71.0418
13065:4	4	K.LNKPFLFDTKPLIVQYEVNFQNGIEC[+57.021]GGAYVK.L		C[+57]	926.23	4	3701.9	3701.9	0	-1.3	135	Specific	730.42	521.82	521.82	11.21	17	>sp|P27824|CALX_HUMAN Calnexin OS=Homo sapiens GN=CANX PE=1 SV=2	2082	YJC_160818_PC9mem_AALmnp_G_01.11296.11296.4	controllerType=0 controllerNumber=1 scan=11296	72.4568
13066:4	4	K.LNKPFLFDTKPLIVQYEVNFQNGIEC[+57.021]GGAYVK.L		C[+57]	926.23	4	3701.9	3701.9	0	-1.3	135	Specific	779.6	779.6	779.6	12.59	17	>sp|P27824|CALX_HUMAN Calnexin OS=Homo sapiens GN=CANX PE=1 SV=2	2082	YJC_160818_PC9mem_AALmnp_G_01.11297.11297.4	controllerType=0 controllerNumber=1 scan=11297	72.4626
12509:4	4	K.LNKPFLFDTKPLIVQYEVNFQN[+0.984]GIEC[+57.021]GGAYVK.L		C[+57], N[+1]	926.477	4	3702.89	3702.89	0	-0.5	135	Specific	592.09	397.57	58.59	7.92	17	>sp|P27824|CALX_HUMAN Calnexin OS=Homo sapiens GN=CANX PE=1 SV=2	2082	YJC_160818_PC9mem_AALmnp_G_01.10810.10810.4	controllerType=0 controllerNumber=1 scan=10810	69.4417
12510:4	4	K.LNKPFLFDTKPLIVQYEVNFQN[+0.984]GIEC[+57.021]GGAYVK.L		C[+57], N[+1]	926.477	4	3702.89	3702.89	0	-0.5	135	Specific	791.79	776.57	99.2	12.54	17	>sp|P27824|CALX_HUMAN Calnexin OS=Homo sapiens GN=CANX PE=1 SV=2	2082	YJC_160818_PC9mem_AALmnp_G_01.10811.10811.4	controllerType=0 controllerNumber=1 scan=10811	69.4443
15502:4	4	K.TYFTDKKTHLYTLILNPDNSFEILVDQSVVNSGNLLNDMTPPVNPSR.E			1330.93	4	5320.69	5320.68	0	0.6	228	Specific	849.46	849.46	64.94	13.15	17	>sp|P27824|CALX_HUMAN Calnexin OS=Homo sapiens GN=CANX PE=1 SV=2	2082	YJC_160818_PC9mem_AALmnp_G_01.13591.13591.4	controllerType=0 controllerNumber=1 scan=13591	86.5817
15489:5	4	K.TYFTDKKTHLYTLILNPDNSFEILVDQSVVN[+0.984]SGNLLNDMTPPVNPSR.E		N[+1]	1064.94	5	5320.67	5321.67	-1	1.1	228	Specific	445.29	86.56	9.87	1.79	17	>sp|P27824|CALX_HUMAN Calnexin OS=Homo sapiens GN=CANX PE=1 SV=2	2082	YJC_160818_PC9mem_AALmnp_G_01.13582.13582.5	controllerType=0 controllerNumber=1 scan=13582	86.529
15501:4	4	K.TYFTDKKTHLYTLILNPDNSFEILVDQSVVNSGNLLN[+0.984]DMTPPVNPSR.E		N[+1]	1330.93	4	5320.69	5321.67	-1	4.3	228	Specific	641.2	272.7	3.42	6.13	17	>sp|P27824|CALX_HUMAN Calnexin OS=Homo sapiens GN=CANX PE=1 SV=2	2082	YJC_160818_PC9mem_AALmnp_G_01.13590.13590.4	controllerType=0 controllerNumber=1 scan=13590	86.5758
16422:3	4	K.THLYTLILNPDNSFEILVDQSVVNSGNLLNDMTPPVNPSR.E			1479.75	3	4437.24	4437.24	0	-0.8	235	Specific	748.86	726.42	25.54	11.48	17	>sp|P27824|CALX_HUMAN Calnexin OS=Homo sapiens GN=CANX PE=1 SV=2	2082	YJC_160818_PC9mem_AALmnp_G_01.14478.14478.3	controllerType=0 controllerNumber=1 scan=14478	92.2399
16421:3	4	K.THLYTLILNPDNSFEILVDQSVVNSGNLLNDMTPPVNPSR.E			1479.75	3	4437.24	4437.24	0	-0.8	235	Specific	870.23	480.16	130.36	14.48	17	>sp|P27824|CALX_HUMAN Calnexin OS=Homo sapiens GN=CANX PE=1 SV=2	2082	YJC_160818_PC9mem_AALmnp_G_01.14477.14477.3	controllerType=0 controllerNumber=1 scan=14477	92.2336
15199:6	4	K.THLYTLILNPDNSFEILVDQSVVNSGNLLNDMTPPVNPSREIEDPEDRKPEDWDERPK.I			1117.89	6	6702.31	6701.27	1	4.5	235	Specific	457.17	116.67	7.51	2.12	17	>sp|P27824|CALX_HUMAN Calnexin OS=Homo sapiens GN=CANX PE=1 SV=2	2082	YJC_160818_PC9mem_AALmnp_G_01.13282.13282.6	controllerType=0 controllerNumber=1 scan=13282	84.6241
15201:6	4	K.THLYTLILNPDNSFEILVDQSVVNSGNLLNDMTPPVNPSREIEDPEDRKPEDWDERPK.I			1117.89	6	6702.31	6701.27	1	4.5	235	Specific	744.47	716.35	29.5	10.89	17	>sp|P27824|CALX_HUMAN Calnexin OS=Homo sapiens GN=CANX PE=1 SV=2	2082	YJC_160818_PC9mem_AALmnp_G_01.13283.13283.6	controllerType=0 controllerNumber=1 scan=13283	84.6301
11064:8	4	R.KPEDWDERPKIPDPEAVKPDDWDEDAPAKIPDEEATKPEGWLDDEPEYVPDPDAEKPEDWDEDMDGEWEAPQIANPR.C			1117.75	8	8934.95	8934.98	0	-3.6	283	Specific	240.76	240.76	226.71	4.7	17	>sp|P27824|CALX_HUMAN Calnexin OS=Homo sapiens GN=CANX PE=1 SV=2	2082	YJC_160818_PC9mem_AALmnp_G_01.9606.9606.8	controllerType=0 controllerNumber=1 scan=9606	62.4752
11063:8	4	R.KPEDWDERPKIPDPEAVKPDDWDEDAPAKIPDEEATKPEGWLDDEPEYVPDPDAEKPEDWDEDMDGEWEAPQIANPR.C			1117.75	8	8934.95	8934.98	0	-3.6	283	Specific	456.43	56.46	56.46	2.07	17	>sp|P27824|CALX_HUMAN Calnexin OS=Homo sapiens GN=CANX PE=1 SV=2	2082	YJC_160818_PC9mem_AALmnp_G_01.9605.9605.8	controllerType=0 controllerNumber=1 scan=9605	62.4692
11083:9	4	R.KPEDWDERPKIPDPEAVKPDDWDEDAPAKIPDEEATKPEGWLDDEPEYVPDPDAEKPEDWDEDMDGEWEAPQIANPR.C			993.666	9	8934.94	8934.98	0	-4.9	283	Specific	464.1	464.1	241.93	6.38	17	>sp|P27824|CALX_HUMAN Calnexin OS=Homo sapiens GN=CANX PE=1 SV=2	2082	YJC_160818_PC9mem_AALmnp_G_01.9620.9620.5	controllerType=0 controllerNumber=1 scan=9620	62.5358
11053:6	4	R.KPEDWDERPKIPDPEAVKPDDWDEDAPAKIPDEEATKPEGWLDDEPEYVPDPDAEKPEDWDEDMDGEWEAPQIANPR.C			1490	6	8934.96	8934.98	0	-2.2	283	Specific	527.97	527.97	309.14	7.03	17	>sp|P27824|CALX_HUMAN Calnexin OS=Homo sapiens GN=CANX PE=1 SV=2	2082	YJC_160818_PC9mem_AALmnp_G_01.9599.9599.3	controllerType=0 controllerNumber=1 scan=9599	62.4447
11051:6	4	R.KPEDWDERPKIPDPEAVKPDDWDEDAPAKIPDEEATKPEGWLDDEPEYVPDPDAEKPEDWDEDMDGEWEAPQIANPR.C			1490	6	8934.96	8934.98	0	-2.2	283	Specific	799.53	338.61	338.61	10.61	17	>sp|P27824|CALX_HUMAN Calnexin OS=Homo sapiens GN=CANX PE=1 SV=2	2082	YJC_160818_PC9mem_AALmnp_G_01.9598.9598.3	controllerType=0 controllerNumber=1 scan=9598	62.4392
10682:6	4	R.KPEDWDERPKIPDPEAVKPDDWDEDAPAKIPDEEATKPEGWLDDEPEYVPDPDAEKPEDWDEDM[+15.995]DGEWEAPQIANPR.C		M[+16]	1492.5	6	8949.97	8950.98	-1	-0.3	283	Specific	174.68	174.68	174.68	3.12	17	>sp|P27824|CALX_HUMAN Calnexin OS=Homo sapiens GN=CANX PE=1 SV=2	2082	YJC_160818_PC9mem_AALmnp_G_01.9263.9263.2	controllerType=0 controllerNumber=1 scan=9263	60.4546
10686:7	4	R.KPEDWDERPKIPDPEAVKPDDWDEDAPAKIPDEEATKPEGWLDDEPEYVPDPDAEKPEDWDEDM[+15.995]DGEWEAPQIANPR.C		M[+16]	1279.57	7	8950.95	8950.98	0	-2.6	283	Specific	499.95	499.95	342.04	6.85	17	>sp|P27824|CALX_HUMAN Calnexin OS=Homo sapiens GN=CANX PE=1 SV=2	2082	YJC_160818_PC9mem_AALmnp_G_01.9268.9268.7	controllerType=0 controllerNumber=1 scan=9268	60.4884
10684:7	4	R.KPEDWDERPKIPDPEAVKPDDWDEDAPAKIPDEEATKPEGWLDDEPEYVPDPDAEKPEDWDEDM[+15.995]DGEWEAPQIANPR.C		M[+16]	1279.57	7	8950.95	8950.98	0	-2.6	283	Specific	707.83	228.8	228.8	9.12	17	>sp|P27824|CALX_HUMAN Calnexin OS=Homo sapiens GN=CANX PE=1 SV=2	2082	YJC_160818_PC9mem_AALmnp_G_01.9267.9267.7	controllerType=0 controllerNumber=1 scan=9267	60.4828
10680:6	4	R.KPEDWDERPKIPDPEAVKPDDWDEDAPAKIPDEEATKPEGWLDDEPEYVPDPDAEKPEDWDEDM[+15.995]DGEWEAPQIANPR.C		M[+16]	1492.5	6	8949.97	8950.98	-1	-0.3	283	Specific	868.08	370.47	207.09	12.63	17	>sp|P27824|CALX_HUMAN Calnexin OS=Homo sapiens GN=CANX PE=1 SV=2	2082	YJC_160818_PC9mem_AALmnp_G_01.9262.9262.2	controllerType=0 controllerNumber=1 scan=9262	60.4522
11656:5	4	K.IPDPEAVKPDDWDEDAPAKIPDEEATKPEGWLDDEPEYVPDPDAEKPEDWDEDMDGEWEAPQIANPR.C			1531.68	5	7654.35	7654.37	0	-2	293	Specific	385.72	385.72	319.43	6.66	17	>sp|P27824|CALX_HUMAN Calnexin OS=Homo sapiens GN=CANX PE=1 SV=2	2082	YJC_160818_PC9mem_AALmnp_G_01.10059.10059.5	controllerType=0 controllerNumber=1 scan=10059	64.8228
11705:6	4	K.IPDPEAVKPDDWDEDAPAKIPDEEATKPEGWLDDEPEYVPDPDAEKPEDWDEDMDGEWEAPQIANPR.C			1276.57	6	7654.36	7654.37	0	-1.4	293	Specific	414.2	85.69	85.69	3.08	17	>sp|P27824|CALX_HUMAN Calnexin OS=Homo sapiens GN=CANX PE=1 SV=2	2082	YJC_160818_PC9mem_AALmnp_G_01.10126.10126.6	controllerType=0 controllerNumber=1 scan=10126	65.267
11706:6	4	K.IPDPEAVKPDDWDEDAPAKIPDEEATKPEGWLDDEPEYVPDPDAEKPEDWDEDMDGEWEAPQIANPR.C			1276.57	6	7654.36	7654.37	0	-1.4	293	Specific	429.77	429.77	363.34	6.85	17	>sp|P27824|CALX_HUMAN Calnexin OS=Homo sapiens GN=CANX PE=1 SV=2	2082	YJC_160818_PC9mem_AALmnp_G_01.10127.10127.6	controllerType=0 controllerNumber=1 scan=10127	65.2726
11667:7	4	K.IPDPEAVKPDDWDEDAPAKIPDEEATKPEGWLDDEPEYVPDPDAEKPEDWDEDMDGEWEAPQIANPR.C			1094.34	7	7654.35	7654.37	0	-2.3	293	Specific	469.29	79.26	79.26	2.48	17	>sp|P27824|CALX_HUMAN Calnexin OS=Homo sapiens GN=CANX PE=1 SV=2	2082	YJC_160818_PC9mem_AALmnp_G_01.10074.10074.7	controllerType=0 controllerNumber=1 scan=10074	64.9173
11668:7	4	K.IPDPEAVKPDDWDEDAPAKIPDEEATKPEGWLDDEPEYVPDPDAEKPEDWDEDMDGEWEAPQIANPR.C			1094.34	7	7654.35	7654.37	0	-2.3	293	Specific	573.36	573.36	359.86	7.49	17	>sp|P27824|CALX_HUMAN Calnexin OS=Homo sapiens GN=CANX PE=1 SV=2	2082	YJC_160818_PC9mem_AALmnp_G_01.10075.10075.7	controllerType=0 controllerNumber=1 scan=10075	64.9229
11676:8	4	K.IPDPEAVKPDDWDEDAPAKIPDEEATKPEGWLDDEPEYVPDPDAEKPEDWDEDMDGEWEAPQIANPR.C			957.674	8	7654.34	7654.37	0	-3	293	Specific	628.71	628.71	310.34	9.06	17	>sp|P27824|CALX_HUMAN Calnexin OS=Homo sapiens GN=CANX PE=1 SV=2	2082	YJC_160818_PC9mem_AALmnp_G_01.10085.10085.8	controllerType=0 controllerNumber=1 scan=10085	64.9853
11655:5	4	K.IPDPEAVKPDDWDEDAPAKIPDEEATKPEGWLDDEPEYVPDPDAEKPEDWDEDMDGEWEAPQIANPR.C			1531.68	5	7654.35	7654.37	0	-2	293	Specific	735.84	310.28	310.28	10.1	17	>sp|P27824|CALX_HUMAN Calnexin OS=Homo sapiens GN=CANX PE=1 SV=2	2082	YJC_160818_PC9mem_AALmnp_G_01.10058.10058.5	controllerType=0 controllerNumber=1 scan=10058	64.8172
23053:6	4	K.IPDPEAVKPDDWDEDAPAKIPDEEATKPEGWLDDEPEYVPDPDAEKPEDWDEDM[+15.995]DGEWEAPQIANPR.C		M[+16]	1279.23	6	7670.37	7670.36	0	1.3	293	Specific	175.55	175.55	175.55	3.56	17	>sp|P27824|CALX_HUMAN Calnexin OS=Homo sapiens GN=CANX PE=1 SV=2	2082	YJC_160818_PC9mem_AALmnp_G_01.21342.21342.6	controllerType=0 controllerNumber=1 scan=21342	145.238
11352:6	4	K.IPDPEAVKPDDWDEDAPAKIPDEEATKPEGWLDDEPEYVPDPDAEKPEDWDEDM[+15.995]DGEWEAPQIANPR.C		M[+16]	1279.4	6	7671.33	7670.36	1	-3.9	293	Specific	343.74	343.74	331.38	5.82	17	>sp|P27824|CALX_HUMAN Calnexin OS=Homo sapiens GN=CANX PE=1 SV=2	2082	YJC_160818_PC9mem_AALmnp_G_01.9817.9817.6	controllerType=0 controllerNumber=1 scan=9817	63.5058
11086:5	4	K.IPDPEAVKPDDWDEDAPAKIPDEEATKPEGWLDDEPEYVPDPDAEKPEDWDEDM[+15.995]DGEWEAPQIANPR.C		M[+16]	1534.88	5	7670.35	7670.36	0	-1.9	293	Specific	495.88	495.88	326.51	6.98	17	>sp|P27824|CALX_HUMAN Calnexin OS=Homo sapiens GN=CANX PE=1 SV=2	2082	YJC_160818_PC9mem_AALmnp_G_01.9622.9622.5	controllerType=0 controllerNumber=1 scan=9622	62.5401
11350:6	4	K.IPDPEAVKPDDWDEDAPAKIPDEEATKPEGWLDDEPEYVPDPDAEKPEDWDEDM[+15.995]DGEWEAPQIANPR.C		M[+16]	1279.4	6	7671.33	7670.36	1	-3.9	293	Specific	536.11	97.7	97.7	3.57	17	>sp|P27824|CALX_HUMAN Calnexin OS=Homo sapiens GN=CANX PE=1 SV=2	2082	YJC_160818_PC9mem_AALmnp_G_01.9816.9816.6	controllerType=0 controllerNumber=1 scan=9816	63.5036
23051:6	4	K.IPDPEAVKPDDWDEDAPAKIPDEEATKPEGWLDDEPEYVPDPDAEKPEDWDEDM[+15.995]DGEWEAPQIANPR.C		M[+16]	1279.23	6	7670.37	7670.36	0	1.3	293	Specific	554.91	26.92	26.92	3.45	17	>sp|P27824|CALX_HUMAN Calnexin OS=Homo sapiens GN=CANX PE=1 SV=2	2082	YJC_160818_PC9mem_AALmnp_G_01.21341.21341.6	controllerType=0 controllerNumber=1 scan=21341	145.235
11085:5	4	K.IPDPEAVKPDDWDEDAPAKIPDEEATKPEGWLDDEPEYVPDPDAEKPEDWDEDM[+15.995]DGEWEAPQIANPR.C		M[+16]	1534.88	5	7670.35	7670.36	0	-1.9	293	Specific	779.64	331.61	331.61	10.8	17	>sp|P27824|CALX_HUMAN Calnexin OS=Homo sapiens GN=CANX PE=1 SV=2	2082	YJC_160818_PC9mem_AALmnp_G_01.9621.9621.5	controllerType=0 controllerNumber=1 scan=9621	62.538
11711:5	4	K.PDDWDEDAPAKIPDEEATKPEGWLDDEPEYVPDPDAEKPEDWDEDMDGEWEAPQIANPR.C			1361.79	5	6804.91	6804.91	0	0	301	Specific	615.52	138.48	138.48	6.5	17	>sp|P27824|CALX_HUMAN Calnexin OS=Homo sapiens GN=CANX PE=1 SV=2	2082	YJC_160818_PC9mem_AALmnp_G_01.10133.10133.5	controllerType=0 controllerNumber=1 scan=10133	65.3051
11712:5	4	K.PDDWDEDAPAKIPDEEATKPEGWLDDEPEYVPDPDAEKPEDWDEDMDGEWEAPQIANPR.C			1361.79	5	6804.91	6804.91	0	0	301	Specific	1016.6	1010.87	427.22	17.77	17	>sp|P27824|CALX_HUMAN Calnexin OS=Homo sapiens GN=CANX PE=1 SV=2	2082	YJC_160818_PC9mem_AALmnp_G_01.10134.10134.5	controllerType=0 controllerNumber=1 scan=10134	65.3118
11644:6	4	K.IPDEEATKPEGWLDDEPEYVPDPDAEKPEDWDEDMDGEWEAPQIANPR.C			928.568	6	5566.37	5565.4	1	-6.1	312	Specific	194.62	126.23	126.23	0.49	17	>sp|P27824|CALX_HUMAN Calnexin OS=Homo sapiens GN=CANX PE=1 SV=2	2082	YJC_160818_PC9mem_AALmnp_G_01.10049.10049.6	controllerType=0 controllerNumber=1 scan=10049	64.7641
11605:5	4	K.IPDEEATKPEGWLDDEPEYVPDPDAEKPEDWDEDMDGEWEAPQIANPR.C			1113.89	5	5565.4	5565.4	0	0.1	312	Specific	479.01	30.02	30.02	0.59	17	>sp|P27824|CALX_HUMAN Calnexin OS=Homo sapiens GN=CANX PE=1 SV=2	2082	YJC_160818_PC9mem_AALmnp_G_01.10018.10018.5	controllerType=0 controllerNumber=1 scan=10018	64.5947
11606:5	4	K.IPDEEATKPEGWLDDEPEYVPDPDAEKPEDWDEDMDGEWEAPQIANPR.C			1113.89	5	5565.4	5565.4	0	0.1	312	Specific	706.05	663.71	370.26	10.9	17	>sp|P27824|CALX_HUMAN Calnexin OS=Homo sapiens GN=CANX PE=1 SV=2	2082	YJC_160818_PC9mem_AALmnp_G_01.10019.10019.5	controllerType=0 controllerNumber=1 scan=10019	64.6011
11601:4	4	K.IPDEEATKPEGWLDDEPEYVPDPDAEKPEDWDEDMDGEWEAPQIANPR.C			1392.11	4	5565.41	5565.4	0	0.8	312	Specific	873.57	447.34	391.3	14.05	17	>sp|P27824|CALX_HUMAN Calnexin OS=Homo sapiens GN=CANX PE=1 SV=2	2082	YJC_160818_PC9mem_AALmnp_G_01.10013.10013.4	controllerType=0 controllerNumber=1 scan=10013	64.5594
11603:4	4	K.IPDEEATKPEGWLDDEPEYVPDPDAEKPEDWDEDMDGEWEAPQIANPR.C			1392.11	4	5565.41	5565.4	0	0.8	312	Specific	1138.62	1083.55	503.77	19.45	17	>sp|P27824|CALX_HUMAN Calnexin OS=Homo sapiens GN=CANX PE=1 SV=2	2082	YJC_160818_PC9mem_AALmnp_G_01.10014.10014.4	controllerType=0 controllerNumber=1 scan=10014	64.5656
21331:3	4	R.MTPFSAIGLELWSMTSDIFFDNFIIC[+57.021]ADRR.I		C[+57]	1185.23	3	3553.69	3553.7	0	-1.6	416	Specific	537.69	537.69	537.69	7.47	17	>sp|P27824|CALX_HUMAN Calnexin OS=Homo sapiens GN=CANX PE=1 SV=2	2082	YJC_160818_PC9mem_AALmnp_G_01.18884.18884.3	controllerType=0 controllerNumber=1 scan=18884	121.788
21329:3	4	R.MTPFSAIGLELWSMTSDIFFDNFIIC[+57.021]ADRR.I		C[+57]	1185.23	3	3553.69	3553.7	0	-1.6	416	Specific	897	553.28	553.28	14.78	17	>sp|P27824|CALX_HUMAN Calnexin OS=Homo sapiens GN=CANX PE=1 SV=2	2082	YJC_160818_PC9mem_AALmnp_G_01.18883.18883.3	controllerType=0 controllerNumber=1 scan=18883	121.78
19411:4	4	R.MTPFSAIGLELWSM[+15.995]TSDIFFDNFIIC[+57.021]ADRR.I		C[+57], M[+16]	893.178	4	3569.69	3569.69	0	-0.2	416	Specific	378.29	165.32	165.32	3.26	17	>sp|P27824|CALX_HUMAN Calnexin OS=Homo sapiens GN=CANX PE=1 SV=2	2082	YJC_160818_PC9mem_AALmnp_G_01.17142.17142.4	controllerType=0 controllerNumber=1 scan=17142	109.77
19406:3	4	R.MTPFSAIGLELWSM[+15.995]TSDIFFDNFIIC[+57.021]ADRR.I		C[+57], M[+16]	1190.56	3	3569.68	3569.69	0	-3.1	416	Specific	503.21	497.25	497.25	6.93	17	>sp|P27824|CALX_HUMAN Calnexin OS=Homo sapiens GN=CANX PE=1 SV=2	2082	YJC_160818_PC9mem_AALmnp_G_01.17137.17137.3	controllerType=0 controllerNumber=1 scan=17137	109.732
19404:3	4	R.MTPFSAIGLELWSM[+15.995]TSDIFFDNFIIC[+57.021]ADRR.I		C[+57], M[+16]	1190.56	3	3569.68	3569.69	0	-3.1	416	Specific	767.92	530.04	530.04	12.41	17	>sp|P27824|CALX_HUMAN Calnexin OS=Homo sapiens GN=CANX PE=1 SV=2	2082	YJC_160818_PC9mem_AALmnp_G_01.17136.17136.3	controllerType=0 controllerNumber=1 scan=17136	109.723
19413:4	4	R.MTPFSAIGLELWSM[+15.995]TSDIFFDNFIIC[+57.021]ADRR.I		C[+57], M[+16]	893.178	4	3569.69	3569.69	0	-0.2	416	Specific	865.36	838.19	838.19	14.19	17	>sp|P27824|CALX_HUMAN Calnexin OS=Homo sapiens GN=CANX PE=1 SV=2	2082	YJC_160818_PC9mem_AALmnp_G_01.17143.17143.4	controllerType=0 controllerNumber=1 scan=17143	109.776
20463:3	4	R.M[+15.995]TPFSAIGLELWSMTSDIFFDN[+0.984]FIIC[+57.021]ADRR.I		C[+57], M[+16], N[+1]	1190.9	3	3570.69	3570.67	0	3.3	416	Specific	276.39	232.49	232.49	3.98	17	>sp|P27824|CALX_HUMAN Calnexin OS=Homo sapiens GN=CANX PE=1 SV=2	2082	YJC_160818_PC9mem_AALmnp_G_01.18107.18107.3	controllerType=0 controllerNumber=1 scan=18107	116.418
20474:4	4	R.M[+15.995]TPFSAIGLELWSMTSDIFFDN[+0.984]FIIC[+57.021]ADRR.I		C[+57], M[+16], N[+1]	893.428	4	3570.69	3570.67	0	4.7	416	Specific	399.11	229.05	229.05	3.43	17	>sp|P27824|CALX_HUMAN Calnexin OS=Homo sapiens GN=CANX PE=1 SV=2	2082	YJC_160818_PC9mem_AALmnp_G_01.18113.18113.4	controllerType=0 controllerNumber=1 scan=18113	116.455
20476:4	4	R.M[+15.995]TPFSAIGLELWSMTSDIFFDN[+0.984]FIIC[+57.021]ADRR.I		C[+57], M[+16], N[+1]	893.428	4	3570.69	3570.67	0	4.7	416	Specific	441.71	398.04	398.04	5.75	17	>sp|P27824|CALX_HUMAN Calnexin OS=Homo sapiens GN=CANX PE=1 SV=2	2082	YJC_160818_PC9mem_AALmnp_G_01.18114.18114.4	controllerType=0 controllerNumber=1 scan=18114	116.46
20461:3	4	R.M[+15.995]TPFSAIGLELWSMTSDIFFDN[+0.984]FIIC[+57.021]ADRR.I		C[+57], M[+16], N[+1]	1190.9	3	3570.69	3570.67	0	3.3	416	Specific	509.57	164.11	164.11	3.73	17	>sp|P27824|CALX_HUMAN Calnexin OS=Homo sapiens GN=CANX PE=1 SV=2	2082	YJC_160818_PC9mem_AALmnp_G_01.18106.18106.3	controllerType=0 controllerNumber=1 scan=18106	116.411
19873:4	5	K.TIQEVAGYVLIALNTVERIPLENLQIIR.G			795.46	4	3178.82	3178.82	0	-1.1	81	Specific	547.74	469.27	469.27	6.64	24	>sp|P00533|EGFR_HUMAN Epidermal growth factor receptor OS=Homo sapiens GN=EGFR PE=1 SV=2	5130	YJC_160818_PC9mem_AALmnp_G_01.17580.17580.4	controllerType=0 controllerNumber=1 scan=17580	112.775
19875:4	5	K.TIQEVAGYVLIALNTVERIPLENLQIIR.G			795.46	4	3178.82	3178.82	0	-1.1	81	Specific	1034.43	1034.43	1034.43	17.24	24	>sp|P00533|EGFR_HUMAN Epidermal growth factor receptor OS=Homo sapiens GN=EGFR PE=1 SV=2	5130	YJC_160818_PC9mem_AALmnp_G_01.17581.17581.4	controllerType=0 controllerNumber=1 scan=17581	112.781
11019:3	5	R.GNMYYENSYALAVLSNYDANKTGLK.E			933.778	3	2799.32	2799.33	0	-3.2	109	Specific	535.36	373.47	373.47	6.33	24	>sp|P00533|EGFR_HUMAN Epidermal growth factor receptor OS=Homo sapiens GN=EGFR PE=1 SV=2	5130	YJC_160818_PC9mem_AALmnp_G_01.9568.9568.3	controllerType=0 controllerNumber=1 scan=9568	62.2464
11020:3	5	R.GNMYYENSYALAVLSNYDANKTGLK.E			933.778	3	2799.32	2799.33	0	-3.2	109	Specific	560.65	511.38	511.38	7.99	24	>sp|P00533|EGFR_HUMAN Epidermal growth factor receptor OS=Homo sapiens GN=EGFR PE=1 SV=2	5130	YJC_160818_PC9mem_AALmnp_G_01.9569.9569.3	controllerType=0 controllerNumber=1 scan=9569	62.2527
11499:4	5	R.GNMYYENSYALAVLSNYDANKTGLKELPMR.N			857.165	4	3425.64	3425.65	0	-3.1	109	Specific	203.81	72.4	72.4	0.58	24	>sp|P00533|EGFR_HUMAN Epidermal growth factor receptor OS=Homo sapiens GN=EGFR PE=1 SV=2	5130	YJC_160818_PC9mem_AALmnp_G_01.9926.9926.4	controllerType=0 controllerNumber=1 scan=9926	64.0517
11500:4	5	R.GNMYYENSYALAVLSNYDANKTGLKELPMR.N			857.165	4	3425.64	3425.65	0	-3.1	109	Specific	930.03	930.03	930.03	15.73	24	>sp|P00533|EGFR_HUMAN Epidermal growth factor receptor OS=Homo sapiens GN=EGFR PE=1 SV=2	5130	YJC_160818_PC9mem_AALmnp_G_01.9927.9927.4	controllerType=0 controllerNumber=1 scan=9927	64.0542
11134:4	5	R.GNMYYENSYALAVLSNYDAN[+2205.793]KTGLKELPMR.N	HexNAc(4)Hex(5)Fuc(2)NeuAc(1)	N[+2206]	1408.87	4	5632.46	5631.44	1	2	109	Specific	232.53	232.53	11.2	4.72	24	>sp|P00533|EGFR_HUMAN Epidermal growth factor receptor OS=Homo sapiens GN=EGFR PE=1 SV=2	5130	YJC_160818_PC9mem_AALmnp_G_01.9654.9654.4	controllerType=0 controllerNumber=1 scan=9654	62.6874
10832:4	5	R.GNMYYENSYALAVLSNYDAN[+1914.697]KTGLKELPMR.N	HexNAc(4)Hex(5)Fuc(2)	N[+1915]	1335.84	4	5340.34	5340.35	0	-2.3	109	Specific	330.19	330.19	19.99	4.99	24	>sp|P00533|EGFR_HUMAN Epidermal growth factor receptor OS=Homo sapiens GN=EGFR PE=1 SV=2	5130	YJC_160818_PC9mem_AALmnp_G_01.9379.9379.4	controllerType=0 controllerNumber=1 scan=9379	61.0836
12166:4	5	R.DIVSSDFLSN[+2351.851]MSMDFQNHLGSC[+57.021]QK.C	HexNAc(4)Hex(5)Fuc(3)NeuAc(1)	C[+57], N[+2352]	1278.77	4	5112.04	5112.06	0	-3.2	166	Specific	285.26	285.26	5.85	4.6	24	>sp|P00533|EGFR_HUMAN Epidermal growth factor receptor OS=Homo sapiens GN=EGFR PE=1 SV=2	5130	YJC_160818_PC9mem_AALmnp_G_01.10503.10503.4	controllerType=0 controllerNumber=1 scan=10503	67.5221
12177:4	5	R.DIVSSDFLSN[+2205.793]MSMDFQNHLGSC[+57.021]QK.C	HexNAc(4)Hex(5)Fuc(2)NeuAc(1)	C[+57], N[+2206]	1242.26	4	4966	4966	0	0.8	166	Specific	302.82	302.82	31.09	4.42	24	>sp|P00533|EGFR_HUMAN Epidermal growth factor receptor OS=Homo sapiens GN=EGFR PE=1 SV=2	5130	YJC_160818_PC9mem_AALmnp_G_01.10510.10510.4	controllerType=0 controllerNumber=1 scan=10510	67.5544
11658:3	5	R.DIVSSDFLSN[+1913.677]MSMDFQNHLGSC[+57.021]QK.C	HexNAc(4)Hex(5)NeuAc(1)	C[+57], N[+1914]	1558.96	3	4674.88	4673.88	1	-2	166	Specific	601.71	601.71	601.71	9.84	24	>sp|P00533|EGFR_HUMAN Epidermal growth factor receptor OS=Homo sapiens GN=EGFR PE=1 SV=2	5130	YJC_160818_PC9mem_AALmnp_G_01.10061.10061.3	controllerType=0 controllerNumber=1 scan=10061	64.8278
12192:3	5	R.DIVSSDFLSN[+2204.772]MSMDFQNHLGSC[+57.021]QK.C	HexNAc(4)Hex(5)Fuc(0)NeuAc(2)	C[+57], N[+2205]	1656	3	4965.97	4964.98	1	-1.7	166	Specific	700.49	700.49	700.49	11.84	24	>sp|P00533|EGFR_HUMAN Epidermal growth factor receptor OS=Homo sapiens GN=EGFR PE=1 SV=2	5130	YJC_160818_PC9mem_AALmnp_G_01.10523.10523.3	controllerType=0 controllerNumber=1 scan=10523	67.6324
11614:3	5	R.DIVSSDFLSN[+2060.755]MSMDFQNHLGSC[+57.021]QK.C	HexNAc(4)Hex(5)Fuc(3)	C[+57], N[+2061]	1607.66	3	4820.96	4820.96	0	-0.5	166	Specific	704.69	704.69	3.72	11.79	24	>sp|P00533|EGFR_HUMAN Epidermal growth factor receptor OS=Homo sapiens GN=EGFR PE=1 SV=2	5130	YJC_160818_PC9mem_AALmnp_G_01.10026.10026.3	controllerType=0 controllerNumber=1 scan=10026	64.6332
13727:4	5	K.TVKEITGFLLIQAWPEN[+2204.772]RTDLHAFENLEIIR.G	HexNAc(4)Hex(5)Fuc(0)NeuAc(2)	N[+2205]	1468.94	4	5872.73	5871.74	1	-0.8	397	Specific	422.45	422.45	422.45	4.35	24	>sp|P00533|EGFR_HUMAN Epidermal growth factor receptor OS=Homo sapiens GN=EGFR PE=1 SV=2	5130	YJC_160818_PC9mem_AALmnp_G_01.11879.11879.4	controllerType=0 controllerNumber=1 scan=11879	76.0544
13320:5	5	K.TVKEITGFLLIQAWPEN[+1914.697]RTDLHAFENLEIIR.G	HexNAc(4)Hex(5)Fuc(2)	N[+1915]	1116.94	5	5580.66	5581.66	-1	0.2	397	Specific	464.97	464.97	50.46	6.39	24	>sp|P00533|EGFR_HUMAN Epidermal growth factor receptor OS=Homo sapiens GN=EGFR PE=1 SV=2	5130	YJC_160818_PC9mem_AALmnp_G_01.11522.11522.5	controllerType=0 controllerNumber=1 scan=11522	73.8648
13318:5	5	K.TVKEITGFLLIQ[+0.984]AWPEN[+2060.755]RTDLHAFENLEIIR.G	HexNAc(4)Hex(5)Fuc(3)	N[+2061], Q[+1]	1146.75	5	5729.71	5728.7	1	0.2	397	Specific	155.24	155.24	3.24	3.19	24	>sp|P00533|EGFR_HUMAN Epidermal growth factor receptor OS=Homo sapiens GN=EGFR PE=1 SV=2	5130	YJC_160818_PC9mem_AALmnp_G_01.11519.11519.5	controllerType=0 controllerNumber=1 scan=11519	73.844
13810:4	5	K.EITGFLLIQAWPEN[+2206.813]RTDLHAFENLEIIR.G	HexNAc(4)Hex(5)Fuc(4)	N[+2207]	1387.15	4	5545.57	5545.57	0	1.3	400	Specific	266.53	266.53	7.27	4.52	24	>sp|P00533|EGFR_HUMAN Epidermal growth factor receptor OS=Homo sapiens GN=EGFR PE=1 SV=2	5130	YJC_160818_PC9mem_AALmnp_G_01.11945.11945.2	controllerType=0 controllerNumber=1 scan=11945	76.4476
12051:4	5	R.TKQHGQFSLAVVSLN[+2206.813]ITSLGLR.S	HexNAc(4)Hex(5)Fuc(4)	N[+2207]	1144.54	4	4575.14	4576.14	-1	0.9	430	Specific	333.92	333.92	1	4.91	24	>sp|P00533|EGFR_HUMAN Epidermal growth factor receptor OS=Homo sapiens GN=EGFR PE=1 SV=2	5130	YJC_160818_PC9mem_AALmnp_G_01.10407.10407.4	controllerType=0 controllerNumber=1 scan=10407	66.9693
07866:6	5	R.EFVENSEC[+57.021]IQC[+57.021]HPEC[+57.021]LPQAMN[+2205.793]ITC[+57.021]TGRGPDN[+0.984]C[+57.021]IQC[+57.021]AHYIDGPHC[+57.021]VK.T	HexNAc(4)Hex(5)Fuc(2)NeuAc(1)	C[+57]*7, N[+1][+2206]	1285.52	6	7708.1	7709.12	-1	-1.8	548	Specific	181.86	181.86	13.21	3.37	24	>sp|P00533|EGFR_HUMAN Epidermal growth factor receptor OS=Homo sapiens GN=EGFR PE=1 SV=2	5130	YJC_160818_PC9mem_AALmnp_G_01.7017.7017.6	controllerType=0 controllerNumber=1 scan=7017	47.1378
07222:3	5	K.TC[+57.021]PAGVMGEN[+1914.697]NTLVWK.Y	HexNAc(4)Hex(5)Fuc(2)	C[+57], N[+1915]	1231.18	3	3691.53	3691.54	0	-2.7	594	Specific	182.56	97.93	97.93	3.07	24	>sp|P00533|EGFR_HUMAN Epidermal growth factor receptor OS=Homo sapiens GN=EGFR PE=1 SV=2	5130	YJC_160818_PC9mem_AALmnp_G_01.6479.6479.3	controllerType=0 controllerNumber=1 scan=6479	43.9749
07836:3	5	K.TC[+57.021]PAGVMGEN[+2205.793]NTLVWK.Y	HexNAc(4)Hex(5)Fuc(2)NeuAc(1)	C[+57], N[+2206]	1328.21	3	3982.62	3982.63	0	-3	594	Specific	220.27	141.92	141.92	4.26	24	>sp|P00533|EGFR_HUMAN Epidermal growth factor receptor OS=Homo sapiens GN=EGFR PE=1 SV=2	5130	YJC_160818_PC9mem_AALmnp_G_01.6996.6996.3	controllerType=0 controllerNumber=1 scan=6996	47.0513
07188:3	5	K.TC[+57.021]PAGVMGEN[+2060.755]NTLVWK.Y	HexNAc(4)Hex(5)Fuc(3)	C[+57], N[+2061]	1279.87	3	3837.59	3837.6	0	-1.5	594	Specific	256.59	162.06	162.06	4.34	24	>sp|P00533|EGFR_HUMAN Epidermal growth factor receptor OS=Homo sapiens GN=EGFR PE=1 SV=2	5130	YJC_160818_PC9mem_AALmnp_G_01.6454.6454.3	controllerType=0 controllerNumber=1 scan=6454	43.8458
06062:3	5	K.TC[+57.021]PAGVM[+15.995]GEN[+2205.793]NTLVWK.Y	HexNAc(4)Hex(5)Fuc(2)NeuAc(1)	C[+57], M[+16], N[+2206]	1333.54	3	3998.62	3998.63	0	-2.4	594	Specific	156.11	30.01	30.01	1.78	24	>sp|P00533|EGFR_HUMAN Epidermal growth factor receptor OS=Homo sapiens GN=EGFR PE=1 SV=2	5130	YJC_160818_PC9mem_AALmnp_G_01.5603.5603.3	controllerType=0 controllerNumber=1 scan=5603	38.7093
06061:3	5	K.TC[+57.021]PAGVM[+15.995]GEN[+2204.772]NTLVWK.Y	HexNAc(4)Hex(5)NeuAc(2)	C[+57], M[+16], N[+2205]	1333.21	3	3997.62	3997.61	0	4	594	Specific	156.96	156.96	156.96	3.27	24	>sp|P00533|EGFR_HUMAN Epidermal growth factor receptor OS=Homo sapiens GN=EGFR PE=1 SV=2	5130	YJC_160818_PC9mem_AALmnp_G_01.5603.5603.3	controllerType=0 controllerNumber=1 scan=5603	38.7093
16544:4	5	R.IYTHQSDVWSYGVTVWELMTFGSKPYDGIPASEISSILEK.G			1134.31	4	4534.21	4534.22	0	-2.3	890	Specific	372.27	372.27	151.2	5.72	24	>sp|P00533|EGFR_HUMAN Epidermal growth factor receptor OS=Homo sapiens GN=EGFR PE=1 SV=2	5130	YJC_160818_PC9mem_AALmnp_G_01.14585.14585.4	controllerType=0 controllerNumber=1 scan=14585	92.8957
16543:4	5	R.IYTHQSDVWSYGVTVWELMTFGSKPYDGIPASEISSILEK.G			1134.31	4	4534.21	4534.22	0	-2.3	890	Specific	835.03	835.03	64.14	13.65	24	>sp|P00533|EGFR_HUMAN Epidermal growth factor receptor OS=Homo sapiens GN=EGFR PE=1 SV=2	5130	YJC_160818_PC9mem_AALmnp_G_01.14584.14584.4	controllerType=0 controllerNumber=1 scan=14584	92.8933
15980:4	5	R.IYTHQSDVWSYGVTVWELMTFGSKPYDGIPASEISSILEKGER.L			1219.85	4	4876.38	4876.38	0	0.3	890	Specific	384.26	384.26	215.09	5.57	24	>sp|P00533|EGFR_HUMAN Epidermal growth factor receptor OS=Homo sapiens GN=EGFR PE=1 SV=2	5130	YJC_160818_PC9mem_AALmnp_G_01.14033.14033.2	controllerType=0 controllerNumber=1 scan=14033	89.3918
15978:4	5	R.IYTHQSDVWSYGVTVWELMTFGSKPYDGIPASEISSILEKGER.L			1219.85	4	4876.38	4876.38	0	0.3	890	Specific	1001.86	1001.86	137.26	17.25	24	>sp|P00533|EGFR_HUMAN Epidermal growth factor receptor OS=Homo sapiens GN=EGFR PE=1 SV=2	5130	YJC_160818_PC9mem_AALmnp_G_01.14032.14032.2	controllerType=0 controllerNumber=1 scan=14032	89.388
16343:5	6	R.LRPGEERHFELEVFEPLESPVDLYILMDFSNSMSDDLDNLKK.M			994.285	5	4967.4	4967.41	0	-2.7	110	Specific	417.18	42.3	42.3	1.78	28	>sp|P16144|ITB4_HUMAN Integrin beta-4 OS=Homo sapiens GN=ITGB4 PE=1 SV=5	8369	YJC_160818_PC9mem_AALmnp_G_01.14408.14408.3	controllerType=0 controllerNumber=1 scan=14408	91.7958
16345:5	6	R.LRPGEERHFELEVFEPLESPVDLYILMDFSNSMSDDLDNLKK.M			994.285	5	4967.4	4967.41	0	-2.7	110	Specific	440.74	317.5	121.92	5	28	>sp|P16144|ITB4_HUMAN Integrin beta-4 OS=Homo sapiens GN=ITGB4 PE=1 SV=5	8369	YJC_160818_PC9mem_AALmnp_G_01.14409.14409.3	controllerType=0 controllerNumber=1 scan=14409	91.8033
14813:5	6	R.DIGWRPDSTHLLVFSTESAFHYEADGANVLAGIMSR.N			793.386	5	3962.9	3962.91	0	-2.6	248	Specific	235.32	83.8	83.8	2.34	28	>sp|P16144|ITB4_HUMAN Integrin beta-4 OS=Homo sapiens GN=ITGB4 PE=1 SV=5	8369	YJC_160818_PC9mem_AALmnp_G_01.12942.12942.5	controllerType=0 controllerNumber=1 scan=12942	82.5663
14815:5	6	R.DIGWRPDSTHLLVFSTESAFHYEADGANVLAGIMSR.N			793.386	5	3962.9	3962.91	0	-2.6	248	Specific	553.36	553.36	553.36	7.79	28	>sp|P16144|ITB4_HUMAN Integrin beta-4 OS=Homo sapiens GN=ITGB4 PE=1 SV=5	8369	YJC_160818_PC9mem_AALmnp_G_01.12943.12943.5	controllerType=0 controllerNumber=1 scan=12943	82.5722
14824:3	6	R.DIGWRPDSTHLLVFSTESAFHYEADGANVLAGIMSR.N			1321.64	3	3962.91	3962.91	0	-1.6	248	Specific	913.3	547.77	547.77	15.06	28	>sp|P16144|ITB4_HUMAN Integrin beta-4 OS=Homo sapiens GN=ITGB4 PE=1 SV=5	8369	YJC_160818_PC9mem_AALmnp_G_01.12951.12951.3	controllerType=0 controllerNumber=1 scan=12951	82.6196
14826:3	6	R.DIGWRPDSTHLLVFSTESAFHYEADGANVLAGIMSR.N			1321.64	3	3962.91	3962.91	0	-1.6	248	Specific	1235.32	1116	1116	21.06	28	>sp|P16144|ITB4_HUMAN Integrin beta-4 OS=Homo sapiens GN=ITGB4 PE=1 SV=5	8369	YJC_160818_PC9mem_AALmnp_G_01.12952.12952.3	controllerType=0 controllerNumber=1 scan=12952	82.6258
13440:4	6	R.DIGWRPDSTHLLVFSTESAFHYEADGANVLAGIM[+15.995]SR.N		M[+16]	995.476	4	3978.88	3978.91	0	-5.9	248	Specific	373.84	178.82	178.82	2.52	28	>sp|P16144|ITB4_HUMAN Integrin beta-4 OS=Homo sapiens GN=ITGB4 PE=1 SV=5	8369	YJC_160818_PC9mem_AALmnp_G_01.11616.11616.4	controllerType=0 controllerNumber=1 scan=11616	74.4315
13442:4	6	R.DIGWRPDSTHLLVFSTESAFHYEADGANVLAGIM[+15.995]SR.N		M[+16]	995.476	4	3978.88	3978.91	0	-5.9	248	Specific	786.56	652.87	652.87	11.98	28	>sp|P16144|ITB4_HUMAN Integrin beta-4 OS=Homo sapiens GN=ITGB4 PE=1 SV=5	8369	YJC_160818_PC9mem_AALmnp_G_01.11617.11617.4	controllerType=0 controllerNumber=1 scan=11617	74.4352
18316:6	6	R.LLAKHNIIPIFAVTN[+2059.735]YSYSYYEKLHTYFPVSSLGVLQEDSSN[+0.984]IVELLEEAFNR.I	HexNAc(4)Hex(5)Fuc(1)NeuAc(1)	N[+1][+2060]	1366.48	6	8193.86	8195.86	-2	1.1	313	Specific	216.06	209.53	0	3.09	28	>sp|P16144|ITB4_HUMAN Integrin beta-4 OS=Homo sapiens GN=ITGB4 PE=1 SV=5	8369	YJC_160818_PC9mem_AALmnp_G_01.16179.16179.2	controllerType=0 controllerNumber=1 scan=16179	103.266
13052:3	6	K.HNIIPIFAVTN[+2205.793]YSYSYYEK.L	HexNAc(4)Hex(5)Fuc(2)NeuAc(1)	N[+2206]	1509.99	3	4527.95	4527.94	0	2.7	317	Specific	162.25	29.52	5.2	2.36	28	>sp|P16144|ITB4_HUMAN Integrin beta-4 OS=Homo sapiens GN=ITGB4 PE=1 SV=5	8369	YJC_160818_PC9mem_AALmnp_G_01.11280.11280.3	controllerType=0 controllerNumber=1 scan=11280	72.3471
10806:4	6	K.HNIIPIFAVTN[+1768.640]YSYSYYEK.L	HexNAc(4)Hex(5)Fuc(1)	N[+1769]	1023.45	4	4090.78	4090.78	0	-1.2	317	Specific	205.76	114.29	114.29	2.33	28	>sp|P16144|ITB4_HUMAN Integrin beta-4 OS=Homo sapiens GN=ITGB4 PE=1 SV=5	8369	YJC_160818_PC9mem_AALmnp_G_01.9359.9359.4	controllerType=0 controllerNumber=1 scan=9359	60.9786
11460:3	6	K.HNIIPIFAVTN[+2059.735]YSYSYYEK.L	HexNAc(4)Hex(5)Fuc(1)NeuAc(1)	N[+2060]	1461.3	3	4381.87	4381.88	0	-1.6	317	Specific	214.8	162.66	27.62	4.09	28	>sp|P16144|ITB4_HUMAN Integrin beta-4 OS=Homo sapiens GN=ITGB4 PE=1 SV=5	8369	YJC_160818_PC9mem_AALmnp_G_01.9898.9898.3	controllerType=0 controllerNumber=1 scan=9898	63.9094
12288:4	6	K.HNIIPIFAVTN[+2351.851]YSYSYYEK.L	HexNAc(4)Hex(5)Fuc(3)NeuAc(1)	N[+2352]	1169	4	4672.98	4673.99	-1	-1.5	317	Specific	349.45	194.46	7.36	4.32	28	>sp|P16144|ITB4_HUMAN Integrin beta-4 OS=Homo sapiens GN=ITGB4 PE=1 SV=5	8369	YJC_160818_PC9mem_AALmnp_G_01.10612.10612.4	controllerType=0 controllerNumber=1 scan=10612	68.1811
10785:3	6	K.HNIIPIFAVTN[+1768.640]YSYSYYEK.L	HexNAc(4)Hex(5)Fuc(1)	N[+1769]	1363.93	3	4089.78	4090.78	-1	-0.9	317	Specific	544.26	420.4	420.4	7.53	28	>sp|P16144|ITB4_HUMAN Integrin beta-4 OS=Homo sapiens GN=ITGB4 PE=1 SV=5	8369	YJC_160818_PC9mem_AALmnp_G_01.9344.9344.3	controllerType=0 controllerNumber=1 scan=9344	60.9059
12298:3	6	K.HNIIPIFAVTN[+2350.830]YSYSYYEK.L	HexNAc(4)Hex(5)Fuc(1)NeuAc(2)	N[+2351]	1558.32	3	4672.96	4672.97	0	-3.1	317	Specific	568.54	403.79	9.2	7.94	28	>sp|P16144|ITB4_HUMAN Integrin beta-4 OS=Homo sapiens GN=ITGB4 PE=1 SV=5	8369	YJC_160818_PC9mem_AALmnp_G_01.10624.10624.3	controllerType=0 controllerNumber=1 scan=10624	68.2659
11438:3	6	K.HNIIPIFAVTN[+2204.772]YSYSYYEK.L	HexNAc(4)Hex(5)Fuc(0)NeuAc(2)	N[+2205]	1509.65	3	4526.92	4526.92	0	1.3	317	Specific	649.91	493.67	7.23	9.53	28	>sp|P16144|ITB4_HUMAN Integrin beta-4 OS=Homo sapiens GN=ITGB4 PE=1 SV=5	8369	YJC_160818_PC9mem_AALmnp_G_01.9877.9877.3	controllerType=0 controllerNumber=1 scan=9877	63.7792
10786:3	6	K.HN[+0.984]IIPIFAVTN[+1768.640]YSYSYYEK.L	HexNAc(4)Hex(5)Fuc(1)	N[+1][+1769]	1364.94	3	4092.79	4091.77	1	5.4	317	Specific	198.12	80.68	80.68	2.44	28	>sp|P16144|ITB4_HUMAN Integrin beta-4 OS=Homo sapiens GN=ITGB4 PE=1 SV=5	8369	YJC_160818_PC9mem_AALmnp_G_01.9344.9344.3	controllerType=0 controllerNumber=1 scan=9344	60.9059
18890:5	6	K.HNIIPIFAVTN[+2059.735]YSYSYYEKLHTYFPVSSLGVLQEDSSNIVELLEEAFNR.I	HexNAc(4)Hex(5)Fuc(1)NeuAc(1)	N[+2060]	1554.52	5	7768.56	7769.58	-1	-2.1	317	Specific	161.39	161.39	161.39	3.73	28	>sp|P16144|ITB4_HUMAN Integrin beta-4 OS=Homo sapiens GN=ITGB4 PE=1 SV=5	8369	YJC_160818_PC9mem_AALmnp_G_01.16703.16703.5	controllerType=0 controllerNumber=1 scan=16703	106.798
18894:6	6	K.HNIIPIFAVTN[+2059.735]YSYSYYEKLHTYFPVSSLGVLQEDSSNIVELLEEAFNR.I	HexNAc(4)Hex(5)Fuc(1)NeuAc(1)	N[+2060]	1295.59	6	7768.51	7769.58	-1	-7.8	317	Specific	232.07	207.98	207.98	3.42	28	>sp|P16144|ITB4_HUMAN Integrin beta-4 OS=Homo sapiens GN=ITGB4 PE=1 SV=5	8369	YJC_160818_PC9mem_AALmnp_G_01.16705.16705.2	controllerType=0 controllerNumber=1 scan=16705	106.805
19575:5	6	K.HNIIPIFAVTN[+2350.830]YSYSYYEKLHTYFPVSSLGVLQEDSSNIVELLEEAFNR.I	HexNAc(4)Hex(5)Fuc(1)NeuAc(2)	N[+2351]	1612.95	5	8060.71	8060.67	0	4.6	317	Specific	482.65	5.33	5.33	1.48	28	>sp|P16144|ITB4_HUMAN Integrin beta-4 OS=Homo sapiens GN=ITGB4 PE=1 SV=5	8369	YJC_160818_PC9mem_AALmnp_G_01.17310.17310.3	controllerType=0 controllerNumber=1 scan=17310	110.907
19821:6	6	K.HNIIPIFAVTN[+2350.793]YSYSYYEKLHTYFPVSSLGVLQEDSSNIVELLEEAFNRIR.S	HexNAc(2)Hex(12)	N[+2351]	1388.97	6	8328.81	8329.82	-1	-0.5	317	Specific	243.71	211.76	6.55	4.49	28	>sp|P16144|ITB4_HUMAN Integrin beta-4 OS=Homo sapiens GN=ITGB4 PE=1 SV=5	8369	YJC_160818_PC9mem_AALmnp_G_01.17537.17537.3	controllerType=0 controllerNumber=1 scan=17537	112.486
19230:6	6	K.HNIIPIFAVTN[+2059.735]YSYSYYEKLHTYFPVSSLGVLQEDSSNIVELLEEAFNRIR.S	HexNAc(4)Hex(5)Fuc(1)NeuAc(1)	N[+2060]	1340.3	6	8036.77	8038.76	-2	1.3	317	Specific	542.42	471.98	369.11	6.77	28	>sp|P16144|ITB4_HUMAN Integrin beta-4 OS=Homo sapiens GN=ITGB4 PE=1 SV=5	8369	YJC_160818_PC9mem_AALmnp_G_01.16993.16993.3	controllerType=0 controllerNumber=1 scan=16993	108.756
09462:7	6	R.ALEHVDGTHVC[+57.021]QLPEDQKGNIHLKPSFSDGLKMDAGIIC[+57.021]DVC[+57.021]TC[+57.021]ELQK.E		C[+57]*4	781.379	7	5463.61	5463.59	0	4	414	Specific	271.28	251.02	26.46	3.63	28	>sp|P16144|ITB4_HUMAN Integrin beta-4 OS=Homo sapiens GN=ITGB4 PE=1 SV=5	8369	YJC_160818_PC9mem_AALmnp_G_01.8267.8267.7	controllerType=0 controllerNumber=1 scan=8267	54.5286
05848:6	6	R.EGEDKPC[+57.021]SGRGEC[+57.021]QC[+57.021]GHC[+57.021]VC[+57.021]YGEGRYEGQFC[+57.021]EYDNFQC[+57.021]PR.T		C[+57]*7	823.82	6	4937.88	4937.9	0	-3.9	506	Specific	431.28	259.69	8.14	5.12	28	>sp|P16144|ITB4_HUMAN Integrin beta-4 OS=Homo sapiens GN=ITGB4 PE=1 SV=5	8369	YJC_160818_PC9mem_AALmnp_G_01.5447.5447.6	controllerType=0 controllerNumber=1 scan=5447	37.7419
06252:4	6	R.C[+57.021]SFRDEDDDC[+57.021]TYSYTMEGDGAPGPN[+2278.809]STVLVHK.K	HexNAc(5)Hex(6)NeuAc(1)	C[+57]*2, N[+2279]	1476.59	4	5903.33	5902.31	1	2.3	671	Specific	108.51	12.14	7.43	1.78	28	>sp|P16144|ITB4_HUMAN Integrin beta-4 OS=Homo sapiens GN=ITGB4 PE=1 SV=5	8369	YJC_160818_PC9mem_AALmnp_G_01.5743.5743.4	controllerType=0 controllerNumber=1 scan=5743	39.5812
06288:5	6	R.C[+57.021]SFRDEDDDC[+57.021]TYSYTMEGDGAPGPN[+1914.697]STVLVHK.K	HexNAc(4)Hex(5)Fuc(2)	C[+57]*2, N[+1915]	1108.44	5	5538.18	5538.2	0	-3.9	671	Specific	168.98	30.27	30.27	1.64	28	>sp|P16144|ITB4_HUMAN Integrin beta-4 OS=Homo sapiens GN=ITGB4 PE=1 SV=5	8369	YJC_160818_PC9mem_AALmnp_G_01.5770.5770.5	controllerType=0 controllerNumber=1 scan=5770	39.7461
06264:4	6	R.C[+57.021]SFRDEDDDC[+57.021]TYSYTMEGDGAPGPN[+2425.887]STVLVHK.K	HexNAc(5)Hex(6)Fuc(3)	C[+57]*2, N[+2426]	1513.35	4	6050.38	6049.39	1	-2.5	671	Specific	210	80.92	80.92	3.43	28	>sp|P16144|ITB4_HUMAN Integrin beta-4 OS=Homo sapiens GN=ITGB4 PE=1 SV=5	8369	YJC_160818_PC9mem_AALmnp_G_01.5750.5750.4	controllerType=0 controllerNumber=1 scan=5750	39.6236
06263:4	6	R.C[+57.021]SFRDEDDDC[+57.021]TYSYTMEGDGAPGPN[+2424.867]STVLVHK.K	HexNAc(5)Hex(6)Fuc(1)NeuAc(1)	C[+57]*2, N[+2425]	1512.85	4	6048.38	6048.37	0	2.5	671	Specific	236.36	98.91	20.95	3.74	28	>sp|P16144|ITB4_HUMAN Integrin beta-4 OS=Homo sapiens GN=ITGB4 PE=1 SV=5	8369	YJC_160818_PC9mem_AALmnp_G_01.5750.5750.4	controllerType=0 controllerNumber=1 scan=5750	39.6236
10579:2	6	R.GMVEFQEGVELVDVR.V			853.92	2	1706.83	1706.84	0	-4.8	931	Specific	473.69	289.69	289.69	5.6	28	>sp|P16144|ITB4_HUMAN Integrin beta-4 OS=Homo sapiens GN=ITGB4 PE=1 SV=5	8369	YJC_160818_PC9mem_AALmnp_G_01.9186.9186.2	controllerType=0 controllerNumber=1 scan=9186	60.0176
10581:2	6	R.GMVEFQEGVELVDVR.V			853.92	2	1706.83	1706.84	0	-4.8	931	Specific	501.49	421.33	421.33	7.08	28	>sp|P16144|ITB4_HUMAN Integrin beta-4 OS=Homo sapiens GN=ITGB4 PE=1 SV=5	8369	YJC_160818_PC9mem_AALmnp_G_01.9187.9187.2	controllerType=0 controllerNumber=1 scan=9187	60.0249
14599:4	6	R.GMVEFQEGVELVDVRVPLFIRPEDDDEKQLLVEAIDVPAGTATLGR.R			1267.16	4	5065.61	5065.62	0	-2.2	931	Specific	606.06	606.06	71.02	9.43	28	>sp|P16144|ITB4_HUMAN Integrin beta-4 OS=Homo sapiens GN=ITGB4 PE=1 SV=5	8369	YJC_160818_PC9mem_AALmnp_G_01.12718.12718.4	controllerType=0 controllerNumber=1 scan=12718	81.1524
14597:4	6	R.GMVEFQEGVELVDVRVPLFIRPEDDDEKQ[+0.984]LLVEAIDVPAGTATLGR.R		Q[+1]	1267.16	4	5065.61	5066.6	-1	1.6	931	Specific	518.97	249.98	114.86	3.56	28	>sp|P16144|ITB4_HUMAN Integrin beta-4 OS=Homo sapiens GN=ITGB4 PE=1 SV=5	8369	YJC_160818_PC9mem_AALmnp_G_01.12717.12717.4	controllerType=0 controllerNumber=1 scan=12717	81.1467
11165:4	6	R.LVNITIIKEQARDVVSFEQPEFSVSR.G			751.906	4	3004.6	3004.61	0	-2.2	978	Specific	191.17	138.92	138.92	1.78	28	>sp|P16144|ITB4_HUMAN Integrin beta-4 OS=Homo sapiens GN=ITGB4 PE=1 SV=5	8369	YJC_160818_PC9mem_AALmnp_G_01.9676.9676.4	controllerType=0 controllerNumber=1 scan=9676	62.8069
11166:4	6	R.LVNITIIKEQARDVVSFEQPEFSVSR.G			751.906	4	3004.6	3004.61	0	-2.2	978	Specific	591.72	591.72	591.72	8.93	28	>sp|P16144|ITB4_HUMAN Integrin beta-4 OS=Homo sapiens GN=ITGB4 PE=1 SV=5	8369	YJC_160818_PC9mem_AALmnp_G_01.9677.9677.4	controllerType=0 controllerNumber=1 scan=9677	62.8096
15464:3	6	K.RPMSIPIIPDIPIVDAQSGEDYDSFLMYSDDVLR.S			1289.96	3	3867.88	3867.88	0	-0.9	1322	Specific	684.11	612.41	612.41	10.54	28	>sp|P16144|ITB4_HUMAN Integrin beta-4 OS=Homo sapiens GN=ITGB4 PE=1 SV=5	8369	YJC_160818_PC9mem_AALmnp_G_01.13555.13555.3	controllerType=0 controllerNumber=1 scan=13555	86.3484
15463:3	6	K.RPMSIPIIPDIPIVDAQSGEDYDSFLMYSDDVLR.S			1289.96	3	3867.88	3867.88	0	-0.9	1322	Specific	945.61	653.6	653.6	15.54	28	>sp|P16144|ITB4_HUMAN Integrin beta-4 OS=Homo sapiens GN=ITGB4 PE=1 SV=5	8369	YJC_160818_PC9mem_AALmnp_G_01.13554.13554.3	controllerType=0 controllerNumber=1 scan=13554	86.342
15641:3	7	R.LKASLDRPFTNLESAFYSIVGLSSLGAQVPDAK.K			1165.62	3	3494.84	3494.85	0	-4.3	37	Specific	487.71	289.11	289.11	4.02	9	>sp|P04844|RPN2_HUMAN Dolichyl-diphosphooligosaccharide--protein glycosyltransferase subunit 2 OS=Homo sapiens GN=RPN2 PE=1 SV=3	14884	YJC_160818_PC9mem_AALmnp_G_01.13714.13714.3	controllerType=0 controllerNumber=1 scan=13714	87.3295
15643:3	7	R.LKASLDRPFTNLESAFYSIVGLSSLGAQVPDAK.K			1165.62	3	3494.84	3494.85	0	-4.3	37	Specific	706.15	633.68	633.68	11.24	9	>sp|P04844|RPN2_HUMAN Dolichyl-diphosphooligosaccharide--protein glycosyltransferase subunit 2 OS=Homo sapiens GN=RPN2 PE=1 SV=3	14884	YJC_160818_PC9mem_AALmnp_G_01.13715.13715.3	controllerType=0 controllerNumber=1 scan=13715	87.3358
16311:3	7	K.ASLDRPFTNLESAFYSIVGLSSLGAQVPDAK.K			1085.23	3	3253.67	3253.67	0	0.3	39	Specific	443.23	239.25	239.25	3.77	9	>sp|P04844|RPN2_HUMAN Dolichyl-diphosphooligosaccharide--protein glycosyltransferase subunit 2 OS=Homo sapiens GN=RPN2 PE=1 SV=3	14884	YJC_160818_PC9mem_AALmnp_G_01.14373.14373.3	controllerType=0 controllerNumber=1 scan=14373	91.5563
16313:3	7	K.ASLDRPFTNLESAFYSIVGLSSLGAQVPDAK.K			1085.23	3	3253.67	3253.67	0	0.3	39	Specific	597.7	477.07	477.07	8.46	9	>sp|P04844|RPN2_HUMAN Dolichyl-diphosphooligosaccharide--protein glycosyltransferase subunit 2 OS=Homo sapiens GN=RPN2 PE=1 SV=3	14884	YJC_160818_PC9mem_AALmnp_G_01.14374.14374.3	controllerType=0 controllerNumber=1 scan=14374	91.5629
20625:4	7	R.SNLDPSNVDSLFYAAQASQALSGC[+57.021]EISISNETKDLLLAAVSEDSSVTQIYHAVAALSGFGLPLASQEALSALTAR.L		C[+57]	1939.22	4	7753.88	7753.87	0	0.9	77	Specific	210.79	210.79	28.99	3.93	9	>sp|P04844|RPN2_HUMAN Dolichyl-diphosphooligosaccharide--protein glycosyltransferase subunit 2 OS=Homo sapiens GN=RPN2 PE=1 SV=3	14884	YJC_160818_PC9mem_AALmnp_G_01.18253.18253.2	controllerType=0 controllerNumber=1 scan=18253	117.393
20608:5	7	R.SNLDPSNVDSLFYAAQASQALSGC[+57.021]EISISNETKDLLLAAVSEDSSVTQIYHAVAALSGFGLPLASQEALSALTAR.L		C[+57]	1551.58	5	7753.87	7753.87	0	0.2	77	Specific	555.76	555.76	18.9	7.32	9	>sp|P04844|RPN2_HUMAN Dolichyl-diphosphooligosaccharide--protein glycosyltransferase subunit 2 OS=Homo sapiens GN=RPN2 PE=1 SV=3	14884	YJC_160818_PC9mem_AALmnp_G_01.18238.18238.5	controllerType=0 controllerNumber=1 scan=18238	117.304
20630:6	7	R.SNLDPSNVDSLFYAAQASQALSGC[+57.021]EISISNETKDLLLAAVSEDSSVTQIYHAVAALSGFGLPLASQEALSALTAR.L		C[+57]	1292.99	6	7752.91	7753.87	-1	5	77	Specific	650.36	650.36	650.36	9.47	9	>sp|P04844|RPN2_HUMAN Dolichyl-diphosphooligosaccharide--protein glycosyltransferase subunit 2 OS=Homo sapiens GN=RPN2 PE=1 SV=3	14884	YJC_160818_PC9mem_AALmnp_G_01.18255.18255.6	controllerType=0 controllerNumber=1 scan=18255	117.4
20628:6	7	R.SNLDPSNVDSLFYAAQASQALSGC[+57.021]EISISNETKDLLLAAVSEDSSVTQIYHAVAALSGFGLPLASQEALSALTAR.L		C[+57]	1292.99	6	7752.91	7753.87	-1	5	77	Specific	721.1	222.65	222.65	8.15	9	>sp|P04844|RPN2_HUMAN Dolichyl-diphosphooligosaccharide--protein glycosyltransferase subunit 2 OS=Homo sapiens GN=RPN2 PE=1 SV=3	14884	YJC_160818_PC9mem_AALmnp_G_01.18254.18254.6	controllerType=0 controllerNumber=1 scan=18254	117.397
20607:5	7	R.SNLDPSNVDSLFYAAQASQALSGC[+57.021]EISISNETKDLLLAAVSEDSSVTQIYHAVAALSGFGLPLASQEALSALTAR.L		C[+57]	1551.58	5	7753.87	7753.87	0	0.2	77	Specific	722.07	315.63	18.38	9.71	9	>sp|P04844|RPN2_HUMAN Dolichyl-diphosphooligosaccharide--protein glycosyltransferase subunit 2 OS=Homo sapiens GN=RPN2 PE=1 SV=3	14884	YJC_160818_PC9mem_AALmnp_G_01.18237.18237.5	controllerType=0 controllerNumber=1 scan=18237	117.299
20623:4	7	R.SNLDPSNVDSLFYAAQASQALSGC[+57.021]EISISNETKDLLLAAVSEDSSVTQIYHAVAALSGFGLPLASQEALSALTAR.L		C[+57]	1939.22	4	7753.88	7753.87	0	0.9	77	Specific	848.21	462.51	31.9	13.84	9	>sp|P04844|RPN2_HUMAN Dolichyl-diphosphooligosaccharide--protein glycosyltransferase subunit 2 OS=Homo sapiens GN=RPN2 PE=1 SV=3	14884	YJC_160818_PC9mem_AALmnp_G_01.18252.18252.2	controllerType=0 controllerNumber=1 scan=18252	117.391
19456:3	7	K.DLLLAAVSEDSSVTQIYHAVAALSGFGLPLASQEALSALTAR.L			1419.42	3	4256.25	4256.24	0	1.8	110	Specific	446.92	378.89	42.64	5.67	9	>sp|P04844|RPN2_HUMAN Dolichyl-diphosphooligosaccharide--protein glycosyltransferase subunit 2 OS=Homo sapiens GN=RPN2 PE=1 SV=3	14884	YJC_160818_PC9mem_AALmnp_G_01.17198.17198.3	controllerType=0 controllerNumber=1 scan=17198	110.165
19455:3	7	K.DLLLAAVSEDSSVTQIYHAVAALSGFGLPLASQEALSALTAR.L			1419.42	3	4256.25	4256.24	0	1.8	110	Specific	811.93	395.93	48.37	12.57	9	>sp|P04844|RPN2_HUMAN Dolichyl-diphosphooligosaccharide--protein glycosyltransferase subunit 2 OS=Homo sapiens GN=RPN2 PE=1 SV=3	14884	YJC_160818_PC9mem_AALmnp_G_01.17197.17197.3	controllerType=0 controllerNumber=1 scan=17197	110.162
22189:3	7	R.SIVEEIEDLVARLDELGGVYLQFEEGLETTALFVAATYK.L			1444.41	3	4331.23	4331.22	0	1.2	179	Specific	613.16	601.2	19.51	9.27	9	>sp|P04844|RPN2_HUMAN Dolichyl-diphosphooligosaccharide--protein glycosyltransferase subunit 2 OS=Homo sapiens GN=RPN2 PE=1 SV=3	14884	YJC_160818_PC9mem_AALmnp_G_01.19546.19546.3	controllerType=0 controllerNumber=1 scan=19546	126.052
22187:3	7	R.SIVEEIEDLVARLDELGGVYLQFEEGLETTALFVAATYK.L			1444.41	3	4331.23	4331.22	0	1.2	179	Specific	834.31	424.29	122.43	12.87	9	>sp|P04844|RPN2_HUMAN Dolichyl-diphosphooligosaccharide--protein glycosyltransferase subunit 2 OS=Homo sapiens GN=RPN2 PE=1 SV=3	14884	YJC_160818_PC9mem_AALmnp_G_01.19545.19545.3	controllerType=0 controllerNumber=1 scan=19545	126.046
11559:3	7	K.KNFESLSEAFSVASAAAVLSHNR.Y			812.412	3	2435.22	2435.23	0	-3.6	244	Specific	591.63	397.88	397.88	8.23	9	>sp|P04844|RPN2_HUMAN Dolichyl-diphosphooligosaccharide--protein glycosyltransferase subunit 2 OS=Homo sapiens GN=RPN2 PE=1 SV=3	14884	YJC_160818_PC9mem_AALmnp_G_01.9978.9978.3	controllerType=0 controllerNumber=1 scan=9978	64.3304
11561:3	7	K.KNFESLSEAFSVASAAAVLSHNR.Y			812.412	3	2435.22	2435.23	0	-3.6	244	Specific	666.94	645.52	645.52	10.61	9	>sp|P04844|RPN2_HUMAN Dolichyl-diphosphooligosaccharide--protein glycosyltransferase subunit 2 OS=Homo sapiens GN=RPN2 PE=1 SV=3	14884	YJC_160818_PC9mem_AALmnp_G_01.9979.9979.3	controllerType=0 controllerNumber=1 scan=9979	64.3364
08234:3	7	R.VKISTEVGITNVDLSTVDKDQSIAPK.T			919.832	3	2757.48	2757.49	0	-1.8	367	Specific	738.61	725	725	11.54	9	>sp|P04844|RPN2_HUMAN Dolichyl-diphosphooligosaccharide--protein glycosyltransferase subunit 2 OS=Homo sapiens GN=RPN2 PE=1 SV=3	14884	YJC_160818_PC9mem_AALmnp_G_01.7301.7301.3	controllerType=0 controllerNumber=1 scan=7301	48.8406
08232:3	7	R.VKISTEVGITNVDLSTVDKDQSIAPK.T			919.832	3	2757.48	2757.49	0	-1.8	367	Specific	785.9	568.27	568.27	12.54	9	>sp|P04844|RPN2_HUMAN Dolichyl-diphosphooligosaccharide--protein glycosyltransferase subunit 2 OS=Homo sapiens GN=RPN2 PE=1 SV=3	14884	YJC_160818_PC9mem_AALmnp_G_01.7300.7300.3	controllerType=0 controllerNumber=1 scan=7300	48.8369
13256:6	7	R.VTYPAKAKGTFIADSHQNFALFFQLVDVNTGAELTPHQTFVR.L			780.738	6	4679.39	4679.4	0	-3.2	396	Specific	388.84	161.05	20.56	4.02	9	>sp|P04844|RPN2_HUMAN Dolichyl-diphosphooligosaccharide--protein glycosyltransferase subunit 2 OS=Homo sapiens GN=RPN2 PE=1 SV=3	14884	YJC_160818_PC9mem_AALmnp_G_01.11471.11471.6	controllerType=0 controllerNumber=1 scan=11471	73.5699
13258:6	7	R.VTYPAKAKGTFIADSHQNFALFFQLVDVNTGAELTPHQTFVR.L			780.738	6	4679.39	4679.4	0	-3.2	396	Specific	826.45	748.76	26.58	13.52	9	>sp|P04844|RPN2_HUMAN Dolichyl-diphosphooligosaccharide--protein glycosyltransferase subunit 2 OS=Homo sapiens GN=RPN2 PE=1 SV=3	14884	YJC_160818_PC9mem_AALmnp_G_01.11472.11472.6	controllerType=0 controllerNumber=1 scan=11472	73.5757
22684:4	7	K.GTFIADSHQNFALFFQLVDVNTGAELTPHQTFVR.L			955.986	4	3820.92	3820.91	0	4.2	404	Specific	514.53	514.53	514.53	6.83	9	>sp|P04844|RPN2_HUMAN Dolichyl-diphosphooligosaccharide--protein glycosyltransferase subunit 2 OS=Homo sapiens GN=RPN2 PE=1 SV=3	14884	YJC_160818_PC9mem_AALmnp_G_01.20870.20870.4	controllerType=0 controllerNumber=1 scan=20870	141.223
14633:4	7	K.GTFIADSHQNFALFFQLVDVNTGAELTPHQTFVR.L			955.98	4	3820.9	3820.91	0	-2.4	404	Specific	802.61	547.11	547.11	13.71	9	>sp|P04844|RPN2_HUMAN Dolichyl-diphosphooligosaccharide--protein glycosyltransferase subunit 2 OS=Homo sapiens GN=RPN2 PE=1 SV=3	14884	YJC_160818_PC9mem_AALmnp_G_01.12743.12743.4	controllerType=0 controllerNumber=1 scan=12743	81.3035
22683:4	7	K.GTFIADSHQNFALFFQLVDVNTGAELTPHQTFVR.L			955.986	4	3820.92	3820.91	0	4.2	404	Specific	835.9	582.31	582.31	13.31	9	>sp|P04844|RPN2_HUMAN Dolichyl-diphosphooligosaccharide--protein glycosyltransferase subunit 2 OS=Homo sapiens GN=RPN2 PE=1 SV=3	14884	YJC_160818_PC9mem_AALmnp_G_01.20869.20869.4	controllerType=0 controllerNumber=1 scan=20869	141.215
14634:4	7	K.GTFIADSHQNFALFFQLVDVNTGAELTPHQTFVR.L			955.98	4	3820.9	3820.91	0	-2.4	404	Specific	1076.86	1076.86	1076.86	18.71	9	>sp|P04844|RPN2_HUMAN Dolichyl-diphosphooligosaccharide--protein glycosyltransferase subunit 2 OS=Homo sapiens GN=RPN2 PE=1 SV=3	14884	YJC_160818_PC9mem_AALmnp_G_01.12744.12744.4	controllerType=0 controllerNumber=1 scan=12744	81.3093
15016:5	8	R.TVDLSSHLAKVTAEVVLAHLGGGSTSRATSFLLALEPELEAR.L			870.075	5	4346.34	4346.34	0	2.2	39	Specific	451.53	370.77	370.77	5.09	8	>sp|P04843|RPN1_HUMAN Dolichyl-diphosphooligosaccharide--protein glycosyltransferase subunit 1 OS=Homo sapiens GN=RPN1 PE=1 SV=1	14883	YJC_160818_PC9mem_AALmnp_G_01.13117.13117.5	controllerType=0 controllerNumber=1 scan=13117	83.6439
16195:5	8	R.FFTVKLPVALDPGAKISVIVETVYTHVLHPYPTQITQSEK.Q			894.091	5	4466.43	4466.44	0	-2	112	Specific	625.38	493.85	261.92	9.35	8	>sp|P04843|RPN1_HUMAN Dolichyl-diphosphooligosaccharide--protein glycosyltransferase subunit 1 OS=Homo sapiens GN=RPN1 PE=1 SV=1	14883	YJC_160818_PC9mem_AALmnp_G_01.14242.14242.5	controllerType=0 controllerNumber=1 scan=14242	90.6955
16197:5	8	R.FFTVKLPVALDPGAKISVIVETVYTHVLHPYPTQITQSEK.Q			894.091	5	4466.43	4466.44	0	-2	112	Specific	1396.18	1396.18	514.25	24.35	8	>sp|P04843|RPN1_HUMAN Dolichyl-diphosphooligosaccharide--protein glycosyltransferase subunit 1 OS=Homo sapiens GN=RPN1 PE=1 SV=1	14883	YJC_160818_PC9mem_AALmnp_G_01.14243.14243.5	controllerType=0 controllerNumber=1 scan=14243	90.7014
15653:5	8	K.LPVALDPGAKISVIVETVYTHVLHPYPTQITQSEK.Q			769.623	5	3844.08	3844.09	0	-1.2	117	Specific	933.64	911.26	911.26	15.68	8	>sp|P04843|RPN1_HUMAN Dolichyl-diphosphooligosaccharide--protein glycosyltransferase subunit 1 OS=Homo sapiens GN=RPN1 PE=1 SV=1	14883	YJC_160818_PC9mem_AALmnp_G_01.13724.13724.5	controllerType=0 controllerNumber=1 scan=13724	87.3951
15486:7	8	K.LPVALDPGAKISVIVETVYTHVLHPYPTQITQSEKQFVVFEGNHYFYSPYPTK.T			864.881	7	6048.13	6048.13	0	0.1	117	Specific	341.6	35.15	28.99	1.13	8	>sp|P04843|RPN1_HUMAN Dolichyl-diphosphooligosaccharide--protein glycosyltransferase subunit 1 OS=Homo sapiens GN=RPN1 PE=1 SV=1	14883	YJC_160818_PC9mem_AALmnp_G_01.13578.13578.7	controllerType=0 controllerNumber=1 scan=13578	86.5043
15495:5	8	K.LPVALDPGAKISVIVETVYTHVLHPYPTQITQSEKQFVVFEGNHYFYSPYPTK.T			1210.43	5	6048.12	6048.13	0	-0.8	117	Specific	768.45	768.45	175.03	11.79	8	>sp|P04843|RPN1_HUMAN Dolichyl-diphosphooligosaccharide--protein glycosyltransferase subunit 1 OS=Homo sapiens GN=RPN1 PE=1 SV=1	14883	YJC_160818_PC9mem_AALmnp_G_01.13586.13586.5	controllerType=0 controllerNumber=1 scan=13586	86.5539
15493:5	8	K.LPVALDPGAKISVIVETVYTHVLHPYPTQITQSEKQFVVFEGNHYFYSPYPTK.T			1210.43	5	6048.12	6048.13	0	-0.8	117	Specific	858.64	424.03	22.6	13.39	8	>sp|P04843|RPN1_HUMAN Dolichyl-diphosphooligosaccharide--protein glycosyltransferase subunit 1 OS=Homo sapiens GN=RPN1 PE=1 SV=1	14883	YJC_160818_PC9mem_AALmnp_G_01.13585.13585.5	controllerType=0 controllerNumber=1 scan=13585	86.5479
15488:7	8	K.LPVALDPGAKISVIVETVYTHVLHPYPTQITQSEKQFVVFEGNHYFYSPYPTK.T			864.881	7	6048.13	6048.13	0	0.1	117	Specific	906.58	906.58	133.37	15.29	8	>sp|P04843|RPN1_HUMAN Dolichyl-diphosphooligosaccharide--protein glycosyltransferase subunit 1 OS=Homo sapiens GN=RPN1 PE=1 SV=1	14883	YJC_160818_PC9mem_AALmnp_G_01.13579.13579.7	controllerType=0 controllerNumber=1 scan=13579	86.5101
12886:6	8	K.ISVIVETVYTHVLHPYPTQITQSEKQFVVFEGNHYFYSPYPTK.T			848.6	6	5086.56	5086.57	0	-0.7	127	Specific	497.85	257.6	36.93	5.12	8	>sp|P04843|RPN1_HUMAN Dolichyl-diphosphooligosaccharide--protein glycosyltransferase subunit 1 OS=Homo sapiens GN=RPN1 PE=1 SV=1	14883	YJC_160818_PC9mem_AALmnp_G_01.11127.11127.6	controllerType=0 controllerNumber=1 scan=11127	71.3699
12888:6	8	K.ISVIVETVYTHVLHPYPTQITQSEKQFVVFEGNHYFYSPYPTK.T			848.6	6	5086.56	5086.57	0	-0.7	127	Specific	1355.09	1222.3	192.25	24.6	8	>sp|P04843|RPN1_HUMAN Dolichyl-diphosphooligosaccharide--protein glycosyltransferase subunit 1 OS=Homo sapiens GN=RPN1 PE=1 SV=1	14883	YJC_160818_PC9mem_AALmnp_G_01.11128.11128.6	controllerType=0 controllerNumber=1 scan=11128	71.3723
12484:6	8	K.ISVIVETVYTHVLHPYPTQITQSEKQFVVFEGNHYFYSPYPTKTQTMR.V			951.479	6	5703.84	5703.86	0	-4	127	Specific	624.86	300.06	4.13	7.53	8	>sp|P04843|RPN1_HUMAN Dolichyl-diphosphooligosaccharide--protein glycosyltransferase subunit 1 OS=Homo sapiens GN=RPN1 PE=1 SV=1	14883	YJC_160818_PC9mem_AALmnp_G_01.10784.10784.6	controllerType=0 controllerNumber=1 scan=10784	69.2714
12500:5	8	K.ISVIVETVYTHVLHPYPTQITQSEKQFVVFEGNHYFYSPYPTKTQTMR.V			1141.58	5	5703.88	5703.86	0	2.4	127	Specific	955.63	895.04	126.34	15.75	8	>sp|P04843|RPN1_HUMAN Dolichyl-diphosphooligosaccharide--protein glycosyltransferase subunit 1 OS=Homo sapiens GN=RPN1 PE=1 SV=1	14883	YJC_160818_PC9mem_AALmnp_G_01.10797.10797.5	controllerType=0 controllerNumber=1 scan=10797	69.3593
12486:6	8	K.ISVIVETVYTHVLHPYPTQITQSEKQFVVFEGNHYFYSPYPTKTQTMR.V			951.479	6	5703.84	5703.86	0	-4	127	Specific	1048.31	970.62	81	17.31	8	>sp|P04843|RPN1_HUMAN Dolichyl-diphosphooligosaccharide--protein glycosyltransferase subunit 1 OS=Homo sapiens GN=RPN1 PE=1 SV=1	14883	YJC_160818_PC9mem_AALmnp_G_01.10785.10785.6	controllerType=0 controllerNumber=1 scan=10785	69.2742
12499:5	8	K.ISVIVETVYTHVLHPYPTQITQ[+0.984]SEKQFVVFEGNHYFYSPYPTKTQTMR.V		Q[+1]	1141.58	5	5703.88	5704.85	-1	5.8	127	Specific	626.91	217.84	9.26	5.94	8	>sp|P04843|RPN1_HUMAN Dolichyl-diphosphooligosaccharide--protein glycosyltransferase subunit 1 OS=Homo sapiens GN=RPN1 PE=1 SV=1	14883	YJC_160818_PC9mem_AALmnp_G_01.10796.10796.5	controllerType=0 controllerNumber=1 scan=10796	69.3523
12155:5	8	K.TILPAAAQDVYYRDEIGN[+1378.476]VSTSHLLILDDSVEMEIRPR.F	HexNAc(2)Hex(6)	N[+1378]	1136.54	5	5678.65	5678.67	0	-2.8	282	Specific	264.05	42.21	42.21	3.45	8	>sp|P04843|RPN1_HUMAN Dolichyl-diphosphooligosaccharide--protein glycosyltransferase subunit 1 OS=Homo sapiens GN=RPN1 PE=1 SV=1	14883	YJC_160818_PC9mem_AALmnp_G_01.10493.10493.5	controllerType=0 controllerNumber=1 scan=10493	67.4545
16221:3	9	R.DMDLTEVITGTLWNLSSHDSIK.M			825.741	3	2475.21	2475.21	0	0.2	465	Specific	533.32	394.69	394.69	7.01	9	>sp|O60716|CTND1_HUMAN Catenin delta-1 OS=Homo sapiens GN=CTNND1 PE=1 SV=1	4059	YJC_160818_PC9mem_AALmnp_G_01.14266.14266.3	controllerType=0 controllerNumber=1 scan=14266	90.8239
16222:3	9	R.DMDLTEVITGTLWNLSSHDSIK.M			825.741	3	2475.21	2475.21	0	0.2	465	Specific	596.41	471.48	471.48	8.7	9	>sp|O60716|CTND1_HUMAN Catenin delta-1 OS=Homo sapiens GN=CTNND1 PE=1 SV=1	4059	YJC_160818_PC9mem_AALmnp_G_01.14267.14267.3	controllerType=0 controllerNumber=1 scan=14267	90.8298
16810:4	9	R.DMDLTEVITGTLWNLSSHDSIKMEIVDHALHALTDEVIIPHSGWEREPNEDC[+57.021]KPR.H		C[+57]	1588.27	4	6350.06	6350.06	0	-0.4	465	Specific	178.65	178.65	26.32	3.38	9	>sp|O60716|CTND1_HUMAN Catenin delta-1 OS=Homo sapiens GN=CTNND1 PE=1 SV=1	4059	YJC_160818_PC9mem_AALmnp_G_01.14834.14834.2	controllerType=0 controllerNumber=1 scan=14834	94.5093
16807:7	9	R.DMDLTEVITGTLWNLSSHDSIKMEIVDHALHALTDEVIIPHSGWEREPNEDC[+57.021]KPR.H		C[+57]	908.013	7	6350.05	6350.06	0	-1.4	465	Specific	572.69	572.69	90.56	6.99	9	>sp|O60716|CTND1_HUMAN Catenin delta-1 OS=Homo sapiens GN=CTNND1 PE=1 SV=1	4059	YJC_160818_PC9mem_AALmnp_G_01.14831.14831.7	controllerType=0 controllerNumber=1 scan=14831	94.4917
16797:5	9	R.DMDLTEVITGTLWNLSSHDSIKMEIVDHALHALTDEVIIPHSGWEREPNEDC[+57.021]KPR.H		C[+57]	1270.82	5	6350.06	6350.06	0	-0.2	465	Specific	761.28	364.04	45.88	10.5	9	>sp|O60716|CTND1_HUMAN Catenin delta-1 OS=Homo sapiens GN=CTNND1 PE=1 SV=1	4059	YJC_160818_PC9mem_AALmnp_G_01.14825.14825.5	controllerType=0 controllerNumber=1 scan=14825	94.4596
16809:4	9	R.DMDLTEVITGTLWNLSSHDSIKMEIVDHALHALTDEVIIPHSGWEREPNEDC[+57.021]KPR.H		C[+57]	1588.27	4	6350.06	6350.06	0	-0.4	465	Specific	784.61	397.86	13.28	11.71	9	>sp|O60716|CTND1_HUMAN Catenin delta-1 OS=Homo sapiens GN=CTNND1 PE=1 SV=1	4059	YJC_160818_PC9mem_AALmnp_G_01.14833.14833.2	controllerType=0 controllerNumber=1 scan=14833	94.5032
16799:5	9	R.DMDLTEVITGTLWNLSSHDSIKMEIVDHALHALTDEVIIPHSGWEREPNEDC[+57.021]KPR.H		C[+57]	1270.82	5	6350.06	6350.06	0	-0.2	465	Specific	816.25	816.25	105.15	12.76	9	>sp|O60716|CTND1_HUMAN Catenin delta-1 OS=Homo sapiens GN=CTNND1 PE=1 SV=1	4059	YJC_160818_PC9mem_AALmnp_G_01.14826.14826.5	controllerType=0 controllerNumber=1 scan=14826	94.4624
16792:8	9	R.DMDLTEVITGTLWNLSSHDSIKMEIVDHALHALTDEVIIPHSGWEREPNEDC[+57.021]KPR.H		C[+57]	794.637	8	6350.04	6350.06	0	-2.2	465	Specific	956.68	956.68	74.6	16.36	9	>sp|O60716|CTND1_HUMAN Catenin delta-1 OS=Homo sapiens GN=CTNND1 PE=1 SV=1	4059	YJC_160818_PC9mem_AALmnp_G_01.14821.14821.8	controllerType=0 controllerNumber=1 scan=14821	94.4361
11141:5	9	K.MEIVDHALHALTDEVIIPHSGWEREPN[+0.984]EDC[+57.021]KPR.H		C[+57], N[+1]	779.778	5	3894.86	3894.85	0	2.3	487	Specific	412.5	185.89	185.89	3.64	9	>sp|O60716|CTND1_HUMAN Catenin delta-1 OS=Homo sapiens GN=CTNND1 PE=1 SV=1	4059	YJC_160818_PC9mem_AALmnp_G_01.9659.9659.5	controllerType=0 controllerNumber=1 scan=9659	62.7008
11143:5	9	K.MEIVDHALHALTDEVIIPHSGWEREPN[+0.984]EDC[+57.021]KPR.H		C[+57], N[+1]	779.778	5	3894.86	3894.85	0	2.3	487	Specific	505.83	497.11	497.11	5.55	9	>sp|O60716|CTND1_HUMAN Catenin delta-1 OS=Homo sapiens GN=CTNND1 PE=1 SV=1	4059	YJC_160818_PC9mem_AALmnp_G_01.9660.9660.5	controllerType=0 controllerNumber=1 scan=9660	62.7038
17259:3	9	K.LREC[+57.021]DGLVDALIFIVQAEIGQK.D		C[+57]	829.783	3	2487.33	2487.33	0	2.3	548	Specific	393.35	191.62	191.62	3.89	9	>sp|O60716|CTND1_HUMAN Catenin delta-1 OS=Homo sapiens GN=CTNND1 PE=1 SV=1	4059	YJC_160818_PC9mem_AALmnp_G_01.15226.15226.3	controllerType=0 controllerNumber=1 scan=15226	97.0762
17261:3	9	K.LREC[+57.021]DGLVDALIFIVQAEIGQK.D		C[+57]	829.783	3	2487.33	2487.33	0	2.3	548	Specific	630.48	545.93	545.93	9.66	9	>sp|O60716|CTND1_HUMAN Catenin delta-1 OS=Homo sapiens GN=CTNND1 PE=1 SV=1	4059	YJC_160818_PC9mem_AALmnp_G_01.15227.15227.3	controllerType=0 controllerNumber=1 scan=15227	97.0789
16011:3	9	K.LREC[+57.021]DGLVDALIFIVQAEIGQKDSDSK.L		C[+57]	1007.18	3	3019.53	3019.54	0	-3.5	548	Specific	681.47	418.67	418.67	10.1	9	>sp|O60716|CTND1_HUMAN Catenin delta-1 OS=Homo sapiens GN=CTNND1 PE=1 SV=1	4059	YJC_160818_PC9mem_AALmnp_G_01.14069.14069.3	controllerType=0 controllerNumber=1 scan=14069	89.6409
16013:3	9	K.LREC[+57.021]DGLVDALIFIVQAEIGQKDSDSK.L		C[+57]	1007.18	3	3019.53	3019.54	0	-3.5	548	Specific	770.55	593	593	12.47	9	>sp|O60716|CTND1_HUMAN Catenin delta-1 OS=Homo sapiens GN=CTNND1 PE=1 SV=1	4059	YJC_160818_PC9mem_AALmnp_G_01.14070.14070.3	controllerType=0 controllerNumber=1 scan=14070	89.6473
16743:4	9	R.EC[+57.021]DGLVDALIFIVQAEIGQKDSDSKLVENC[+57.021]VC[+57.021]LLR.N		C[+57]*3	1002.5	4	4006.98	4006.99	0	-2.4	550	Specific	471.07	232.35	57.74	4.31	9	>sp|O60716|CTND1_HUMAN Catenin delta-1 OS=Homo sapiens GN=CTNND1 PE=1 SV=1	4059	YJC_160818_PC9mem_AALmnp_G_01.14780.14780.4	controllerType=0 controllerNumber=1 scan=14780	94.1735
16745:4	9	R.EC[+57.021]DGLVDALIFIVQAEIGQKDSDSKLVENC[+57.021]VC[+57.021]LLR.N		C[+57]*3	1002.5	4	4006.98	4006.99	0	-2.4	550	Specific	1159.49	925.52	271.41	20.73	9	>sp|O60716|CTND1_HUMAN Catenin delta-1 OS=Homo sapiens GN=CTNND1 PE=1 SV=1	4059	YJC_160818_PC9mem_AALmnp_G_01.14781.14781.4	controllerType=0 controllerNumber=1 scan=14781	94.1797
20534:3	9	K.NLPGGQQNSSWNFSEDTVISILNTINEVIAENLEAAKK.L			1382.03	3	4144.07	4144.08	0	-2	758	Specific	434.64	369.94	38.34	5.91	9	>sp|O60716|CTND1_HUMAN Catenin delta-1 OS=Homo sapiens GN=CTNND1 PE=1 SV=1	4059	YJC_160818_PC9mem_AALmnp_G_01.18165.18165.3	controllerType=0 controllerNumber=1 scan=18165	116.797
20533:3	9	K.NLPGGQQN[+0.984]SSWNFSEDTVISILNTINEVIAENLEAAKK.L		N[+1]	1382.03	3	4144.07	4145.07	-1	2.7	758	Specific	982.04	571.99	3.81	16.2	9	>sp|O60716|CTND1_HUMAN Catenin delta-1 OS=Homo sapiens GN=CTNND1 PE=1 SV=1	4059	YJC_160818_PC9mem_AALmnp_G_01.18164.18164.3	controllerType=0 controllerNumber=1 scan=18164	116.791
10259:3	9	R.AAALVLQTIWGYKELRKPLEK.E			809.809	3	2427.41	2427.41	0	-0.1	821	Specific	458.65	343.51	343.51	4.82	9	>sp|O60716|CTND1_HUMAN Catenin delta-1 OS=Homo sapiens GN=CTNND1 PE=1 SV=1	4059	YJC_160818_PC9mem_AALmnp_G_01.8909.8909.3	controllerType=0 controllerNumber=1 scan=8909	58.3363
10261:3	9	R.AAALVLQTIWGYKELRKPLEK.E			809.809	3	2427.41	2427.41	0	-0.1	821	Specific	772.2	750.8	750.8	12.16	9	>sp|O60716|CTND1_HUMAN Catenin delta-1 OS=Homo sapiens GN=CTNND1 PE=1 SV=1	4059	YJC_160818_PC9mem_AALmnp_G_01.8910.8910.3	controllerType=0 controllerNumber=1 scan=8910	58.3429
14521:4	10	R.GVGMVADPDNPLVLDILTGSSTSYSFFPDKPITQYPHAVGK.N			1084.29	4	4334.16	4334.17	0	-2.8	199	Specific	896.88	623.69	98.77	14.65	6	>sp|P39656|OST48_HUMAN Dolichyl-diphosphooligosaccharide--protein glycosyltransferase 48 kDa subunit OS=Homo sapiens GN=DDOST PE=1 SV=4	12312	YJC_160818_PC9mem_AALmnp_G_01.12634.12634.4	controllerType=0 controllerNumber=1 scan=12634	80.6338
14522:4	10	R.GVGMVADPDNPLVLDILTGSSTSYSFFPDKPITQYPHAVGK.N			1084.29	4	4334.16	4334.17	0	-2.8	199	Specific	1216.56	1206.23	131.4	21.65	6	>sp|P39656|OST48_HUMAN Dolichyl-diphosphooligosaccharide--protein glycosyltransferase 48 kDa subunit OS=Homo sapiens GN=DDOST PE=1 SV=4	12312	YJC_160818_PC9mem_AALmnp_G_01.12635.12635.4	controllerType=0 controllerNumber=1 scan=12635	80.6396
14163:4	10	R.GVGM[+15.995]VADPDNPLVLDILTGSSTSYSFFPDKPITQYPHAVGK.N		M[+16]	1088.29	4	4350.14	4350.16	0	-5.5	199	Specific	720.93	434.28	91.87	10.75	6	>sp|P39656|OST48_HUMAN Dolichyl-diphosphooligosaccharide--protein glycosyltransferase 48 kDa subunit OS=Homo sapiens GN=DDOST PE=1 SV=4	12312	YJC_160818_PC9mem_AALmnp_G_01.12268.12268.4	controllerType=0 controllerNumber=1 scan=12268	78.3545
14165:4	10	R.GVGM[+15.995]VADPDNPLVLDILTGSSTSYSFFPDKPITQYPHAVGK.N		M[+16]	1088.29	4	4350.14	4350.16	0	-5.5	199	Specific	1052.38	937.03	108.67	18.13	6	>sp|P39656|OST48_HUMAN Dolichyl-diphosphooligosaccharide--protein glycosyltransferase 48 kDa subunit OS=Homo sapiens GN=DDOST PE=1 SV=4	12312	YJC_160818_PC9mem_AALmnp_G_01.12269.12269.4	controllerType=0 controllerNumber=1 scan=12269	78.3574
14695:4	10	R.GVGMVADPDNPLVLDILTGSSTSYSFFPDKPITQYPHAVGKNTLLIAGLQAR.N			1371.96	4	5484.84	5484.85	0	-2.5	199	Specific	808.71	425.93	64.56	12.73	6	>sp|P39656|OST48_HUMAN Dolichyl-diphosphooligosaccharide--protein glycosyltransferase 48 kDa subunit OS=Homo sapiens GN=DDOST PE=1 SV=4	12312	YJC_160818_PC9mem_AALmnp_G_01.12819.12819.4	controllerType=0 controllerNumber=1 scan=12819	81.7717
14697:4	10	R.GVGMVADPDNPLVLDILTGSSTSYSFFPDKPITQYPHAVGKNTLLIAGLQAR.N			1371.96	4	5484.84	5484.85	0	-2.5	199	Specific	1030.71	1030.71	61.3	17.36	6	>sp|P39656|OST48_HUMAN Dolichyl-diphosphooligosaccharide--protein glycosyltransferase 48 kDa subunit OS=Homo sapiens GN=DDOST PE=1 SV=4	12312	YJC_160818_PC9mem_AALmnp_G_01.12820.12820.4	controllerType=0 controllerNumber=1 scan=12820	81.7744
14019:6	10	R.GVGMVADPDNPLVLDILTGSSTSYSFFPDKPITQYPHAVGKNTLLIAGLQARNNAR.V			990.851	6	5940.07	5940.08	0	-0.6	199	Specific	1016.76	957.34	128.98	17.45	6	>sp|P39656|OST48_HUMAN Dolichyl-diphosphooligosaccharide--protein glycosyltransferase 48 kDa subunit OS=Homo sapiens GN=DDOST PE=1 SV=4	12312	YJC_160818_PC9mem_AALmnp_G_01.12141.12141.6	controllerType=0 controllerNumber=1 scan=12141	77.6083
15210:2	10	R.VIFSGSLDFFSDSFFNSAVQK.A			1171.57	2	2342.14	2342.13	0	2.4	255	Specific	186.41	100.4	100.4	0.99	6	>sp|P39656|OST48_HUMAN Dolichyl-diphosphooligosaccharide--protein glycosyltransferase 48 kDa subunit OS=Homo sapiens GN=DDOST PE=1 SV=4	12312	YJC_160818_PC9mem_AALmnp_G_01.13291.13291.2	controllerType=0 controllerNumber=1 scan=13291	84.6718
15185:3	10	R.VIFSGSLDFFSDSFFNSAVQK.A			781.383	3	2342.14	2342.13	0	0.6	255	Specific	449.66	281.2	281.2	4.72	6	>sp|P39656|OST48_HUMAN Dolichyl-diphosphooligosaccharide--protein glycosyltransferase 48 kDa subunit OS=Homo sapiens GN=DDOST PE=1 SV=4	12312	YJC_160818_PC9mem_AALmnp_G_01.13266.13266.3	controllerType=0 controllerNumber=1 scan=13266	84.5151
15183:3	10	R.VIFSGSLDFFSDSFFNSAVQK.A			781.383	3	2342.14	2342.13	0	0.6	255	Specific	458.74	295.29	295.29	4.72	6	>sp|P39656|OST48_HUMAN Dolichyl-diphosphooligosaccharide--protein glycosyltransferase 48 kDa subunit OS=Homo sapiens GN=DDOST PE=1 SV=4	12312	YJC_160818_PC9mem_AALmnp_G_01.13265.13265.3	controllerType=0 controllerNumber=1 scan=13265	84.5122
15209:2	10	R.VIFSGSLDFFSDSFFNSAVQK.A			1171.57	2	2342.14	2342.13	0	2.4	255	Specific	609.09	407.61	407.61	9.62	6	>sp|P39656|OST48_HUMAN Dolichyl-diphosphooligosaccharide--protein glycosyltransferase 48 kDa subunit OS=Homo sapiens GN=DDOST PE=1 SV=4	12312	YJC_160818_PC9mem_AALmnp_G_01.13290.13290.2	controllerType=0 controllerNumber=1 scan=13290	84.6653
14269:3	10	R.YSQTGNYELAVALSRWVFKEEGVLR.V			972.505	3	2915.5	2915.51	0	-1.9	283	Specific	791.25	687.72	687.72	12.54	6	>sp|P39656|OST48_HUMAN Dolichyl-diphosphooligosaccharide--protein glycosyltransferase 48 kDa subunit OS=Homo sapiens GN=DDOST PE=1 SV=4	12312	YJC_160818_PC9mem_AALmnp_G_01.12384.12384.3	controllerType=0 controllerNumber=1 scan=12384	79.0981
14916:2	11	K.VVVYSNTIQSIIAIIR.A			895.031	2	1789.05	1789.06	0	-1.9	71	Specific	553.54	445.85	445.85	7.72	10	>sp|P08754|GNAI3_HUMAN Guanine nucleotide-binding protein G(k) subunit alpha OS=Homo sapiens GN=GNAI3 PE=1 SV=3	6873	YJC_160818_PC9mem_AALmnp_G_01.13035.13035.2	controllerType=0 controllerNumber=1 scan=13035	83.1566
14915:2	11	K.VVVYSNTIQSIIAIIR.A			895.031	2	1789.05	1789.06	0	-1.9	71	Specific	684.18	523.51	523.51	10.7	10	>sp|P08754|GNAI3_HUMAN Guanine nucleotide-binding protein G(k) subunit alpha OS=Homo sapiens GN=GNAI3 PE=1 SV=3	6873	YJC_160818_PC9mem_AALmnp_G_01.13034.13034.2	controllerType=0 controllerNumber=1 scan=13034	83.1509
12171:3	11	R.QLFVLAGSAEEGVMTPELAGVIKR.L			839.125	3	2515.36	2515.36	0	0.7	106	Specific	801.34	614.09	614.09	13.75	10	>sp|P08754|GNAI3_HUMAN Guanine nucleotide-binding protein G(k) subunit alpha OS=Homo sapiens GN=GNAI3 PE=1 SV=3	6873	YJC_160818_PC9mem_AALmnp_G_01.10507.10507.3	controllerType=0 controllerNumber=1 scan=10507	67.5427
12173:3	11	R.QLFVLAGSAEEGVMTPELAGVIKR.L			839.125	3	2515.36	2515.36	0	0.7	106	Specific	816.77	787.89	787.89	13.75	10	>sp|P08754|GNAI3_HUMAN Guanine nucleotide-binding protein G(k) subunit alpha OS=Homo sapiens GN=GNAI3 PE=1 SV=3	6873	YJC_160818_PC9mem_AALmnp_G_01.10508.10508.3	controllerType=0 controllerNumber=1 scan=10508	67.5486
08721:3	11	R.SREYQLNDSASYYLNDLDR.I			774.689	3	2322.05	2322.06	0	-4.4	143	Specific	278.2	181.32	181.32	3.51	10	>sp|P08754|GNAI3_HUMAN Guanine nucleotide-binding protein G(k) subunit alpha OS=Homo sapiens GN=GNAI3 PE=1 SV=3	6873	YJC_160818_PC9mem_AALmnp_G_01.7677.7677.3	controllerType=0 controllerNumber=1 scan=7677	51.0135
08723:3	11	R.SREYQLNDSASYYLNDLDR.I			774.689	3	2322.05	2322.06	0	-4.4	143	Specific	662.73	611.79	611.79	10.73	10	>sp|P08754|GNAI3_HUMAN Guanine nucleotide-binding protein G(k) subunit alpha OS=Homo sapiens GN=GNAI3 PE=1 SV=3	6873	YJC_160818_PC9mem_AALmnp_G_01.7678.7678.3	controllerType=0 controllerNumber=1 scan=7678	51.0219
11728:4	11	R.SREYQLNDSASYYLNDLDRISQSNYIPTQQDVLR.T			1016.99	4	4064.95	4064.96	0	-2.9	143	Specific	808	768.3	201.12	13.68	10	>sp|P08754|GNAI3_HUMAN Guanine nucleotide-binding protein G(k) subunit alpha OS=Homo sapiens GN=GNAI3 PE=1 SV=3	6873	YJC_160818_PC9mem_AALmnp_G_01.10150.10150.4	controllerType=0 controllerNumber=1 scan=10150	65.4216
11727:4	11	R.SREYQLNDSASYYLNDLDRISQSN[+0.984]YIPTQQDVLR.T		N[+1]	1016.99	4	4064.95	4065.94	-1	1.8	143	Specific	316.14	68.27	20.69	0.82	10	>sp|P08754|GNAI3_HUMAN Guanine nucleotide-binding protein G(k) subunit alpha OS=Homo sapiens GN=GNAI3 PE=1 SV=3	6873	YJC_160818_PC9mem_AALmnp_G_01.10149.10149.4	controllerType=0 controllerNumber=1 scan=10149	65.4152
09445:3	11	R.VKTTGIVETHFTFKDLYFK.M			758.742	3	2274.21	2274.22	0	-2.5	179	Specific	500.99	362.29	362.29	5.68	10	>sp|P08754|GNAI3_HUMAN Guanine nucleotide-binding protein G(k) subunit alpha OS=Homo sapiens GN=GNAI3 PE=1 SV=3	6873	YJC_160818_PC9mem_AALmnp_G_01.8249.8249.3	controllerType=0 controllerNumber=1 scan=8249	54.4155
09447:3	11	R.VKTTGIVETHFTFKDLYFK.M			758.742	3	2274.21	2274.22	0	-2.5	179	Specific	586.11	555.87	555.87	8.33	10	>sp|P08754|GNAI3_HUMAN Guanine nucleotide-binding protein G(k) subunit alpha OS=Homo sapiens GN=GNAI3 PE=1 SV=3	6873	YJC_160818_PC9mem_AALmnp_G_01.8250.8250.3	controllerType=0 controllerNumber=1 scan=8250	54.4217
14224:3	11	K.RSPLTIC[+57.021]YPEYTGSNTYEEAAAYIQC[+57.021]QFEDLNR.R		C[+57]*2	1320.6	3	3959.78	3959.78	0	-2.4	280	Specific	681.1	610.56	610.56	10.71	10	>sp|P08754|GNAI3_HUMAN Guanine nucleotide-binding protein G(k) subunit alpha OS=Homo sapiens GN=GNAI3 PE=1 SV=3	6873	YJC_160818_PC9mem_AALmnp_G_01.12329.12329.3	controllerType=0 controllerNumber=1 scan=12329	78.7454
14223:3	11	K.RSPLTIC[+57.021]YPEYTGSNTYEEAAAYIQC[+57.021]QFEDLNR.R		C[+57]*2	1320.6	3	3959.78	3959.78	0	-2.4	280	Specific	722.5	388.2	388.2	11.05	10	>sp|P08754|GNAI3_HUMAN Guanine nucleotide-binding protein G(k) subunit alpha OS=Homo sapiens GN=GNAI3 PE=1 SV=3	6873	YJC_160818_PC9mem_AALmnp_G_01.12328.12328.3	controllerType=0 controllerNumber=1 scan=12328	78.7428
14999:3	11	R.SPLTIC[+57.021]YPEYTGSNTYEEAAAYIQC[+57.021]QFEDLNR.R		C[+57]*2	1268.57	3	3803.68	3803.68	0	-0.5	281	Specific	938.25	858.16	858.16	15	10	>sp|P08754|GNAI3_HUMAN Guanine nucleotide-binding protein G(k) subunit alpha OS=Homo sapiens GN=GNAI3 PE=1 SV=3	6873	YJC_160818_PC9mem_AALmnp_G_01.13107.13107.3	controllerType=0 controllerNumber=1 scan=13107	83.5881
14997:3	11	R.SPLTIC[+57.021]YPEYTGSNTYEEAAAYIQC[+57.021]QFEDLNR.R		C[+57]*2	1268.57	3	3803.68	3803.68	0	-0.5	281	Specific	995.34	711.79	711.79	16	10	>sp|P08754|GNAI3_HUMAN Guanine nucleotide-binding protein G(k) subunit alpha OS=Homo sapiens GN=GNAI3 PE=1 SV=3	6873	YJC_160818_PC9mem_AALmnp_G_01.13106.13106.3	controllerType=0 controllerNumber=1 scan=13106	83.5851
14351:5	11	K.EIYTHFTC[+57.021]ATDTKNVQFVFDAVTDVIIKNN[+0.984]LK.E		C[+57], N[+1]	749.984	5	3745.89	3745.88	0	3.1	318	Specific	267.13	122.4	0	2.81	10	>sp|P08754|GNAI3_HUMAN Guanine nucleotide-binding protein G(k) subunit alpha OS=Homo sapiens GN=GNAI3 PE=1 SV=3	6873	YJC_160818_PC9mem_AALmnp_G_01.12464.12464.5	controllerType=0 controllerNumber=1 scan=12464	79.5716
14353:5	11	K.EIYTHFTC[+57.021]ATDTKN[+0.984]VQFVFDAVTDVIIKNNLK.E		C[+57], N[+1]	749.984	5	3745.89	3745.88	0	3.1	318	Specific	857.17	839.51	18.7	14.34	10	>sp|P08754|GNAI3_HUMAN Guanine nucleotide-binding protein G(k) subunit alpha OS=Homo sapiens GN=GNAI3 PE=1 SV=3	6873	YJC_160818_PC9mem_AALmnp_G_01.12465.12465.5	controllerType=0 controllerNumber=1 scan=12465	79.5779
16555:3	12	R.AAFNSGKVDIVAINDPFIDLNYMVYMFQYDSTHGK.F			1328.64	3	3983.89	3983.9	0	-1.3	21	Specific	481.63	409.59	409.59	6.44	8	>sp|P04406|G3P_HUMAN Glyceraldehyde-3-phosphate dehydrogenase OS=Homo sapiens GN=GAPDH PE=1 SV=3	6436	YJC_160818_PC9mem_AALmnp_G_01.14596.14596.3	controllerType=0 controllerNumber=1 scan=14596	92.9663
16553:3	12	R.AAFNSGKVDIVAINDPFIDLNYMVYMFQYDSTHGK.F			1328.64	3	3983.89	3983.9	0	-1.3	21	Specific	682.89	363	363	9.16	8	>sp|P04406|G3P_HUMAN Glyceraldehyde-3-phosphate dehydrogenase OS=Homo sapiens GN=GAPDH PE=1 SV=3	6436	YJC_160818_PC9mem_AALmnp_G_01.14595.14595.3	controllerType=0 controllerNumber=1 scan=14595	92.9604
17019:4	12	R.AAFN[+0.984]SGKVDIVAINDPFIDLNYMVYMFQ[+0.984]YDSTHGK.F		N[+1], Q[+1]	997.226	4	3985.88	3985.87	0	4.1	21	Specific	324.64	170.78	170.78	3.86	8	>sp|P04406|G3P_HUMAN Glyceraldehyde-3-phosphate dehydrogenase OS=Homo sapiens GN=GAPDH PE=1 SV=3	6436	YJC_160818_PC9mem_AALmnp_G_01.15004.15004.4	controllerType=0 controllerNumber=1 scan=15004	95.5994
15299:4	12	R.AAFNSGKVDIVAINDPFIDLNYMVYMFQYDSTHGKFHGTVK.A			1164.07	4	4653.26	4653.26	0	0.3	21	Specific	823.04	422.19	50.01	12.15	8	>sp|P04406|G3P_HUMAN Glyceraldehyde-3-phosphate dehydrogenase OS=Homo sapiens GN=GAPDH PE=1 SV=3	6436	YJC_160818_PC9mem_AALmnp_G_01.13394.13394.4	controllerType=0 controllerNumber=1 scan=13394	85.3348
15293:5	12	R.AAFNSGKVDIVAINDPFIDLNYMVYMFQYDSTHGKFHGTVK.A			931.456	5	4653.25	4653.26	0	-1.6	21	Specific	1054.75	968.52	95.01	18.23	8	>sp|P04406|G3P_HUMAN Glyceraldehyde-3-phosphate dehydrogenase OS=Homo sapiens GN=GAPDH PE=1 SV=3	6436	YJC_160818_PC9mem_AALmnp_G_01.13387.13387.5	controllerType=0 controllerNumber=1 scan=13387	85.2869
15300:4	12	R.AAFNSGKVDIVAINDPFIDLNYMVYMFQYDSTHGKFHGTVK.A			1164.07	4	4653.26	4653.26	0	0.3	21	Specific	1236.9	1144.83	96.83	20.78	8	>sp|P04406|G3P_HUMAN Glyceraldehyde-3-phosphate dehydrogenase OS=Homo sapiens GN=GAPDH PE=1 SV=3	6436	YJC_160818_PC9mem_AALmnp_G_01.13395.13395.4	controllerType=0 controllerNumber=1 scan=13395	85.3411
17589:3	12	K.VDIVAINDPFIDLNYMVYMFQYDSTHGK.F			1103.52	3	3308.55	3308.56	0	-2.9	28	Specific	520.38	472.17	472.17	7.17	8	>sp|P04406|G3P_HUMAN Glyceraldehyde-3-phosphate dehydrogenase OS=Homo sapiens GN=GAPDH PE=1 SV=3	6436	YJC_160818_PC9mem_AALmnp_G_01.15521.15521.3	controllerType=0 controllerNumber=1 scan=15521	98.9466
17587:3	12	K.VDIVAINDPFIDLNYMVYMFQYDSTHGK.F			1103.52	3	3308.55	3308.56	0	-2.9	28	Specific	548.84	270.27	270.27	5.7	8	>sp|P04406|G3P_HUMAN Glyceraldehyde-3-phosphate dehydrogenase OS=Homo sapiens GN=GAPDH PE=1 SV=3	6436	YJC_160818_PC9mem_AALmnp_G_01.15520.15520.3	controllerType=0 controllerNumber=1 scan=15520	98.9386
15947:5	12	K.VDIVAINDPFIDLNYMVYMFQYDSTHGKFHGTVK.A			796.39	5	3977.92	3977.92	0	-0.9	28	Specific	360.48	152.56	152.56	3.43	8	>sp|P04406|G3P_HUMAN Glyceraldehyde-3-phosphate dehydrogenase OS=Homo sapiens GN=GAPDH PE=1 SV=3	6436	YJC_160818_PC9mem_AALmnp_G_01.14005.14005.5	controllerType=0 controllerNumber=1 scan=14005	89.2367
15948:5	12	K.VDIVAINDPFIDLNYMVYMFQYDSTHGKFHGTVK.A			796.39	5	3977.92	3977.92	0	-0.9	28	Specific	1039.21	1039.21	1039.21	17.58	8	>sp|P04406|G3P_HUMAN Glyceraldehyde-3-phosphate dehydrogenase OS=Homo sapiens GN=GAPDH PE=1 SV=3	6436	YJC_160818_PC9mem_AALmnp_G_01.14006.14006.5	controllerType=0 controllerNumber=1 scan=14006	89.2426
12025:3	12	K.WGDAGAEYVVESTGVFTTMEK.A			759.682	3	2277.03	2277.04	0	-3	87	Specific	410.53	295.23	295.23	4.51	8	>sp|P04406|G3P_HUMAN Glyceraldehyde-3-phosphate dehydrogenase OS=Homo sapiens GN=GAPDH PE=1 SV=3	6436	YJC_160818_PC9mem_AALmnp_G_01.10385.10385.3	controllerType=0 controllerNumber=1 scan=10385	66.8323
12369:3	12	K.VIHDNFGIVEGLM[+15.995]TTVHAITATQK.T		M[+16]	871.12	3	2611.35	2611.35	0	-3.6	163	Specific	500.85	272.25	272.25	5.29	8	>sp|P04406|G3P_HUMAN Glyceraldehyde-3-phosphate dehydrogenase OS=Homo sapiens GN=GAPDH PE=1 SV=3	6436	YJC_160818_PC9mem_AALmnp_G_01.10690.10690.3	controllerType=0 controllerNumber=1 scan=10690	68.6958
12371:3	12	K.VIHDNFGIVEGLM[+15.995]TTVHAITATQK.T		M[+16]	871.12	3	2611.35	2611.35	0	-3.6	163	Specific	596.8	569.73	569.73	8.61	8	>sp|P04406|G3P_HUMAN Glyceraldehyde-3-phosphate dehydrogenase OS=Homo sapiens GN=GAPDH PE=1 SV=3	6436	YJC_160818_PC9mem_AALmnp_G_01.10691.10691.3	controllerType=0 controllerNumber=1 scan=10691	68.7021
10114:5	12	K.GILGYTEHQVVSSDFNSDTHSSTFDAGAGIALNDHFVK.L			808.186	5	4036.9	4036.89	0	1.8	272	Specific	730.55	718.97	32.82	11.35	8	>sp|P04406|G3P_HUMAN Glyceraldehyde-3-phosphate dehydrogenase OS=Homo sapiens GN=GAPDH PE=1 SV=3	6436	YJC_160818_PC9mem_AALmnp_G_01.8785.8785.5	controllerType=0 controllerNumber=1 scan=8785	57.5648
10115:4	12	K.GILGYTEHQVVSSDFNSDTHSSTFDAGAGIALNDHFVK.L			1009.73	4	4035.9	4036.89	-1	1.8	272	Specific	878.7	574.23	574.23	13.81	8	>sp|P04406|G3P_HUMAN Glyceraldehyde-3-phosphate dehydrogenase OS=Homo sapiens GN=GAPDH PE=1 SV=3	6436	YJC_160818_PC9mem_AALmnp_G_01.8786.8786.4	controllerType=0 controllerNumber=1 scan=8786	57.5686
10117:4	12	K.GILGYTEHQVVSSDFNSDTHSSTFDAGAGIALNDHFVK.L			1009.73	4	4035.9	4036.89	-1	1.8	272	Specific	1458.87	1380.73	1380.73	25.81	8	>sp|P04406|G3P_HUMAN Glyceraldehyde-3-phosphate dehydrogenase OS=Homo sapiens GN=GAPDH PE=1 SV=3	6436	YJC_160818_PC9mem_AALmnp_G_01.8787.8787.4	controllerType=0 controllerNumber=1 scan=8787	57.5716
08953:4	13	K.LTVNKGLSNHFQVNHTVALSTIGESNYHFGVTYVGTK.Q			1009.27	4	4034.06	4033.06	1	-0.7	103	Specific	838.73	550.28	104.26	13.05	6	>sp|O96008|TOM40_HUMAN Mitochondrial import receptor subunit TOM40 homolog OS=Homo sapiens GN=TOMM40 PE=1 SV=1	17897	YJC_160818_PC9mem_AALmnp_G_01.7853.7853.4	controllerType=0 controllerNumber=1 scan=7853	52.0241
08954:4	13	K.LTVNKGLSNHFQVNHTVALSTIGESNYHFGVTYVGTK.Q			1009.27	4	4034.06	4033.06	1	-0.7	103	Specific	972.67	905.59	174.5	16.05	6	>sp|O96008|TOM40_HUMAN Mitochondrial import receptor subunit TOM40 homolog OS=Homo sapiens GN=TOMM40 PE=1 SV=1	17897	YJC_160818_PC9mem_AALmnp_G_01.7854.7854.4	controllerType=0 controllerNumber=1 scan=7854	52.028
09183:4	13	K.GLSNHFQVNHTVALSTIGESNYHFGVTYVGTK.Q			870.183	4	3477.71	3477.72	0	-2.7	108	Specific	792.56	591.25	591.25	12.45	6	>sp|O96008|TOM40_HUMAN Mitochondrial import receptor subunit TOM40 homolog OS=Homo sapiens GN=TOMM40 PE=1 SV=1	17897	YJC_160818_PC9mem_AALmnp_G_01.8037.8037.4	controllerType=0 controllerNumber=1 scan=8037	53.1172
09184:4	13	K.GLSNHFQVNHTVALSTIGESNYHFGVTYVGTK.Q			870.183	4	3477.71	3477.72	0	-2.7	108	Specific	1146.03	1086	1086	19.45	6	>sp|O96008|TOM40_HUMAN Mitochondrial import receptor subunit TOM40 homolog OS=Homo sapiens GN=TOMM40 PE=1 SV=1	17897	YJC_160818_PC9mem_AALmnp_G_01.8038.8038.4	controllerType=0 controllerNumber=1 scan=8038	53.1231
17330:6	13	K.MAIQTQQSKFVNWQVDGEYRGSDFTAAVTLGNPDVLVGSGILVAHYLQSITPC[+57.021]LALGGELVYHR.R		C[+57]	1166.1	6	6991.54	6990.53	1	-0.2	176	Specific	964.02	964.02	85.3	16.38	6	>sp|O96008|TOM40_HUMAN Mitochondrial import receptor subunit TOM40 homolog OS=Homo sapiens GN=TOMM40 PE=1 SV=1	17897	YJC_160818_PC9mem_AALmnp_G_01.15289.15289.6	controllerType=0 controllerNumber=1 scan=15289	97.453
17329:6	13	K.MAIQ[+0.984]TQQSKFVN[+0.984]WQVDGEYRGSDFTAAVTLGNPDVLVGSGILVAHYLQSITPC[+57.021]LALGGELVYHR.R		C[+57], N[+1], Q[+1]	1166.1	6	6991.54	6992.5	-1	5.4	176	Specific	480.29	101.69	0	2.07	6	>sp|O96008|TOM40_HUMAN Mitochondrial import receptor subunit TOM40 homolog OS=Homo sapiens GN=TOMM40 PE=1 SV=1	17897	YJC_160818_PC9mem_AALmnp_G_01.15288.15288.6	controllerType=0 controllerNumber=1 scan=15288	97.45
18027:5	13	K.FVNWQVDGEYRGSDFTAAVTLGNPDVLVGSGILVAHYLQSITPC[+57.021]LALGGELVYHR.R		C[+57]	1195.81	5	5975.03	5975.02	0	1.4	185	Specific	720.01	321.68	8.05	9.71	6	>sp|O96008|TOM40_HUMAN Mitochondrial import receptor subunit TOM40 homolog OS=Homo sapiens GN=TOMM40 PE=1 SV=1	17897	YJC_160818_PC9mem_AALmnp_G_01.15913.15913.5	controllerType=0 controllerNumber=1 scan=15913	101.489
18029:5	13	K.FVNWQVDGEYRGSDFTAAVTLGNPDVLVGSGILVAHYLQSITPC[+57.021]LALGGELVYHR.R		C[+57]	1195.81	5	5975.03	5975.02	0	1.4	185	Specific	826.51	826.51	82.48	13.27	6	>sp|O96008|TOM40_HUMAN Mitochondrial import receptor subunit TOM40 homolog OS=Homo sapiens GN=TOMM40 PE=1 SV=1	17897	YJC_160818_PC9mem_AALmnp_G_01.15914.15914.5	controllerType=0 controllerNumber=1 scan=15914	101.496
18309:4	13	R.GSDFTAAVTLGNPDVLVGSGILVAHYLQSITPC[+57.021]LALGGELVYHR.R		C[+57]	1146.35	4	4582.38	4581.38	1	-0.4	196	Specific	845.17	492.82	47.75	13.56	6	>sp|O96008|TOM40_HUMAN Mitochondrial import receptor subunit TOM40 homolog OS=Homo sapiens GN=TOMM40 PE=1 SV=1	17897	YJC_160818_PC9mem_AALmnp_G_01.16173.16173.4	controllerType=0 controllerNumber=1 scan=16173	103.23
18310:4	13	R.GSDFTAAVTLGNPDVLVGSGILVAHYLQSITPC[+57.021]LALGGELVYHR.R		C[+57]	1146.35	4	4582.38	4581.38	1	-0.4	196	Specific	1191.02	1162.38	79.5	20.56	6	>sp|O96008|TOM40_HUMAN Mitochondrial import receptor subunit TOM40 homolog OS=Homo sapiens GN=TOMM40 PE=1 SV=1	17897	YJC_160818_PC9mem_AALmnp_G_01.16174.16174.4	controllerType=0 controllerNumber=1 scan=16174	103.236
18231:6	14	R.ALLDSLQLGPDSLTVHLIHEVTKVLLVLELQGLQKN[+1864.634]MTR.F	HexNAc(2)Hex(9)	N[+1865]	1034.19	6	6200.1	6200.08	0	2.4	62	Specific	104.21	61.55	21.5	0.47	10	>sp|Q14697|GANAB_HUMAN Neutral alpha-glucosidase AB OS=Homo sapiens GN=GANAB PE=1 SV=3	6515	YJC_160818_PC9mem_AALmnp_G_01.16108.16108.6	controllerType=0 controllerNumber=1 scan=16108	102.811
18229:6	14	R.ALLDSLQLGPDSLTVHLIHEVTKVLLVLELQGLQKN[+1864.634]MTR.F	HexNAc(2)Hex(9)	N[+1865]	1034.19	6	6200.1	6200.08	0	2.4	62	Specific	392.96	6.77	1.73	0.96	10	>sp|Q14697|GANAB_HUMAN Neutral alpha-glucosidase AB OS=Homo sapiens GN=GANAB PE=1 SV=3	6515	YJC_160818_PC9mem_AALmnp_G_01.16107.16107.6	controllerType=0 controllerNumber=1 scan=16107	102.805
18253:5	14	R.ALLDSLQLGPDSLTVHLIHEVTKVLLVLELQGLQ[+0.984]KN[+1702.581]MTR.F	HexNAc(2)Hex(8)	N[+1703], Q[+1]	1208.41	5	6038.03	6039.01	-1	2.8	62	Specific	173.44	119.15	5.09	1.46	10	>sp|Q14697|GANAB_HUMAN Neutral alpha-glucosidase AB OS=Homo sapiens GN=GANAB PE=1 SV=3	6515	YJC_160818_PC9mem_AALmnp_G_01.16127.16127.5	controllerType=0 controllerNumber=1 scan=16127	102.941
14454:6	14	R.LKVTEGGEPYRLYNLDVFQYELYNPMALYGSVPVLLAHNPHR.D			813.586	6	4876.48	4876.49	0	-2.6	268	Specific	980.45	973.8	101.34	16.61	10	>sp|Q14697|GANAB_HUMAN Neutral alpha-glucosidase AB OS=Homo sapiens GN=GANAB PE=1 SV=3	6515	YJC_160818_PC9mem_AALmnp_G_01.12560.12560.6	controllerType=0 controllerNumber=1 scan=12560	80.1514
17540:6	14	K.VTEGGEPYRLYNLDVFQYELYNPMALYGSVPVLLAHNPHRDLGIFWLNAAETWVDISSNTAGK.T			1188.27	6	7124.56	7124.54	0	3.5	270	Specific	182.99	182.99	28.03	1.79	10	>sp|Q14697|GANAB_HUMAN Neutral alpha-glucosidase AB OS=Homo sapiens GN=GANAB PE=1 SV=3	6515	YJC_160818_PC9mem_AALmnp_G_01.15482.15482.2	controllerType=0 controllerNumber=1 scan=15482	98.6924
17538:6	14	K.VTEGGEPYRLYNLDVFQYELYNPMALYGSVPVLLAHNPHRDLGIFWLNAAETWVDISSNTAGK.T			1188.27	6	7124.56	7124.54	0	3.5	270	Specific	571.14	177.3	15.2	3.95	10	>sp|Q14697|GANAB_HUMAN Neutral alpha-glucosidase AB OS=Homo sapiens GN=GANAB PE=1 SV=3	6515	YJC_160818_PC9mem_AALmnp_G_01.15481.15481.2	controllerType=0 controllerNumber=1 scan=15481	98.6852
17491:3	14	R.DLGIFWLNAAETWVDISSNTAGK.T			836.75	3	2508.24	2508.24	0	-1.5	310	Specific	493.15	322.26	322.26	4.95	10	>sp|Q14697|GANAB_HUMAN Neutral alpha-glucosidase AB OS=Homo sapiens GN=GANAB PE=1 SV=3	6515	YJC_160818_PC9mem_AALmnp_G_01.15423.15423.3	controllerType=0 controllerNumber=1 scan=15423	98.2885
17493:3	14	R.DLGIFWLNAAETWVDISSNTAGK.T			836.75	3	2508.24	2508.24	0	-1.5	310	Specific	667.81	626.87	626.87	10.29	10	>sp|Q14697|GANAB_HUMAN Neutral alpha-glucosidase AB OS=Homo sapiens GN=GANAB PE=1 SV=3	6515	YJC_160818_PC9mem_AALmnp_G_01.15424.15424.3	controllerType=0 controllerNumber=1 scan=15424	98.2959
20166:2	14	R.WMSETGIIDVFLLLGPSISDVFR.Q			1298.18	2	2595.36	2595.35	0	1.1	355	Specific	303.65	303.65	303.65	4.54	10	>sp|Q14697|GANAB_HUMAN Neutral alpha-glucosidase AB OS=Homo sapiens GN=GANAB PE=1 SV=3	6515	YJC_160818_PC9mem_AALmnp_G_01.17841.17841.2	controllerType=0 controllerNumber=1 scan=17841	114.548
20151:3	14	R.WMSETGIIDVFLLLGPSISDVFR.Q			865.788	3	2595.35	2595.35	0	-1.7	355	Specific	398.57	253.12	253.12	3.68	10	>sp|Q14697|GANAB_HUMAN Neutral alpha-glucosidase AB OS=Homo sapiens GN=GANAB PE=1 SV=3	6515	YJC_160818_PC9mem_AALmnp_G_01.17830.17830.3	controllerType=0 controllerNumber=1 scan=17830	114.476
20153:3	14	R.WMSETGIIDVFLLLGPSISDVFR.Q			865.788	3	2595.35	2595.35	0	-1.7	355	Specific	555.72	468.28	468.28	7.32	10	>sp|Q14697|GANAB_HUMAN Neutral alpha-glucosidase AB OS=Homo sapiens GN=GANAB PE=1 SV=3	6515	YJC_160818_PC9mem_AALmnp_G_01.17831.17831.3	controllerType=0 controllerNumber=1 scan=17831	114.484
20165:2	14	R.WMSETGIIDVFLLLGPSISDVFR.Q			1298.18	2	2595.36	2595.35	0	1.1	355	Specific	629.72	456.62	456.62	9.54	10	>sp|Q14697|GANAB_HUMAN Neutral alpha-glucosidase AB OS=Homo sapiens GN=GANAB PE=1 SV=3	6515	YJC_160818_PC9mem_AALmnp_G_01.17840.17840.2	controllerType=0 controllerNumber=1 scan=17840	114.543
21076:4	14	R.WMSETGIIDVFLLLGPSISDVFRQYASLTGTQALPPLFSLGYHQSR.W			1278.66	4	5111.64	5111.63	0	0.7	355	Specific	603.68	603.68	133.71	9.51	10	>sp|Q14697|GANAB_HUMAN Neutral alpha-glucosidase AB OS=Homo sapiens GN=GANAB PE=1 SV=3	6515	YJC_160818_PC9mem_AALmnp_G_01.18648.18648.4	controllerType=0 controllerNumber=1 scan=18648	120.135
21075:4	14	R.WMSETGIIDVFLLLGPSISDVFRQYASLTGTQALPPLFSLGYHQSR.W			1278.66	4	5111.64	5111.63	0	0.7	355	Specific	735.99	341.29	28.43	9.78	10	>sp|Q14697|GANAB_HUMAN Neutral alpha-glucosidase AB OS=Homo sapiens GN=GANAB PE=1 SV=3	6515	YJC_160818_PC9mem_AALmnp_G_01.18647.18647.4	controllerType=0 controllerNumber=1 scan=18647	120.129
16945:3	14	K.ISIPMC[+57.021]LSLGLVGLSFC[+57.021]GADVGGFFKNPEPELLVR.W		C[+57]*2	1264.99	3	3792.94	3792.95	0	-2.6	628	Specific	853.61	584.83	584.83	14.81	10	>sp|Q14697|GANAB_HUMAN Neutral alpha-glucosidase AB OS=Homo sapiens GN=GANAB PE=1 SV=3	6515	YJC_160818_PC9mem_AALmnp_G_01.14944.14944.3	controllerType=0 controllerNumber=1 scan=14944	95.2177
16946:3	14	K.ISIPMC[+57.021]LSLGLVGLSFC[+57.021]GADVGGFFKNPEPELLVR.W		C[+57]*2	1264.99	3	3792.94	3792.95	0	-2.6	628	Specific	1005.94	983.38	983.38	17.81	10	>sp|Q14697|GANAB_HUMAN Neutral alpha-glucosidase AB OS=Homo sapiens GN=GANAB PE=1 SV=3	6515	YJC_160818_PC9mem_AALmnp_G_01.14945.14945.3	controllerType=0 controllerNumber=1 scan=14945	95.2243
17062:6	14	R.YSLLPFWYTLLYQAHREGIPVMRPLWVQYPQDVTTFNIDDQYLLGDALLVHPVSDSGAHGVQ[+0.984]VYLPGQGEVWYDIQSYQK.H		Q[+1]	1550.12	6	9295.67	9297.62	-2	5.8	705	Specific	700.28	217.47	20.8	8.13	10	>sp|Q14697|GANAB_HUMAN Neutral alpha-glucosidase AB OS=Homo sapiens GN=GANAB PE=1 SV=3	6515	YJC_160818_PC9mem_AALmnp_G_01.15035.15035.2	controllerType=0 controllerNumber=1 scan=15035	95.7761
15479:5	14	R.EGIPVMRPLWVQYPQDVTTFNIDDQYLLGDALLVHPVSDSGAHGVQVYLPGQGEVWYDIQSYQK.H			1449.72	5	7244.59	7244.58	0	2.1	721	Specific	886.08	463.5	31.56	14.17	10	>sp|Q14697|GANAB_HUMAN Neutral alpha-glucosidase AB OS=Homo sapiens GN=GANAB PE=1 SV=3	6515	YJC_160818_PC9mem_AALmnp_G_01.13571.13571.5	controllerType=0 controllerNumber=1 scan=13571	86.458
15480:5	14	R.EGIPVMRPLWVQYPQDVTTFNIDDQYLLGDALLVHPVSDSGAHGVQVYLPGQGEVWYDIQSYQK.H			1449.72	5	7244.59	7244.58	0	2.1	721	Specific	901.39	901.39	38.48	15.17	10	>sp|Q14697|GANAB_HUMAN Neutral alpha-glucosidase AB OS=Homo sapiens GN=GANAB PE=1 SV=3	6515	YJC_160818_PC9mem_AALmnp_G_01.13572.13572.5	controllerType=0 controllerNumber=1 scan=13572	86.4611
14106:3	15	R.FQEHLQLQNLGIN[+0.984]PANIGFSTLTMESDKFIC[+57.021]IR.E		C[+57], N[+1]	1279.31	3	3835.93	3835.91	0	3.2	9	Specific	832.67	755.85	22.12	13.09	13	>sp|Q00610|CLH1_HUMAN Clathrin heavy chain 1 OS=Homo sapiens GN=CLTC PE=1 SV=5	3295	YJC_160818_PC9mem_AALmnp_G_01.12210.12210.3	controllerType=0 controllerNumber=1 scan=12210	78.0077
14105:3	15	R.FQEHLQLQN[+0.984]LGINPANIGFSTLTMESDKFIC[+57.021]IR.E		C[+57], N[+1]	1279.31	3	3835.93	3835.91	0	3.2	9	Specific	887.62	530.93	15.78	14.09	13	>sp|Q00610|CLH1_HUMAN Clathrin heavy chain 1 OS=Homo sapiens GN=CLTC PE=1 SV=5	3295	YJC_160818_PC9mem_AALmnp_G_01.12209.12209.3	controllerType=0 controllerNumber=1 scan=12209	78.0048
10725:3	15	K.YGYIHLYDLETGTC[+57.021]IYMNR.I		C[+57]	794.699	3	2382.08	2382.09	0	-3.3	279	Specific	487.9	374.64	374.64	5.65	13	>sp|Q00610|CLH1_HUMAN Clathrin heavy chain 1 OS=Homo sapiens GN=CLTC PE=1 SV=5	3295	YJC_160818_PC9mem_AALmnp_G_01.9295.9295.3	controllerType=0 controllerNumber=1 scan=9295	60.6175
10727:3	15	K.YGYIHLYDLETGTC[+57.021]IYMNR.I		C[+57]	794.699	3	2382.08	2382.09	0	-3.3	279	Specific	598.49	513.53	513.53	8.86	13	>sp|Q00610|CLH1_HUMAN Clathrin heavy chain 1 OS=Homo sapiens GN=CLTC PE=1 SV=5	3295	YJC_160818_PC9mem_AALmnp_G_01.9296.9296.3	controllerType=0 controllerNumber=1 scan=9296	60.6201
20890:4	15	R.ISPDQGQQFAQMLVQDEEPLADITQIVDVFMEYNLIQQC[+57.021]TAFLLDALKNNRPSEGPLQTR.L		C[+57]	1720.1	4	6877.39	6876.4	1	-1.8	524	Specific	195.26	195.26	26.35	4.17	13	>sp|Q00610|CLH1_HUMAN Clathrin heavy chain 1 OS=Homo sapiens GN=CLTC PE=1 SV=5	3295	YJC_160818_PC9mem_AALmnp_G_01.18474.18474.4	controllerType=0 controllerNumber=1 scan=18474	118.93
20859:5	15	R.ISPDQGQQFAQMLVQDEEPLADITQIVDVFMEYNLIQQC[+57.021]TAFLLDALKNNRPSEGPLQTR.L		C[+57]	1375.89	5	6875.41	6876.4	-1	2.8	524	Specific	733.01	733.01	733.01	10.79	13	>sp|Q00610|CLH1_HUMAN Clathrin heavy chain 1 OS=Homo sapiens GN=CLTC PE=1 SV=5	3295	YJC_160818_PC9mem_AALmnp_G_01.18452.18452.5	controllerType=0 controllerNumber=1 scan=18452	118.787
20888:4	15	R.ISPDQGQQFAQMLVQDEEPLADITQIVDVFMEYNLIQQC[+57.021]TAFLLDALKNNRPSEGPLQTR.L		C[+57]	1720.1	4	6877.39	6876.4	1	-1.8	524	Specific	792.15	472.85	9.98	12.42	13	>sp|Q00610|CLH1_HUMAN Clathrin heavy chain 1 OS=Homo sapiens GN=CLTC PE=1 SV=5	3295	YJC_160818_PC9mem_AALmnp_G_01.18473.18473.4	controllerType=0 controllerNumber=1 scan=18473	118.924
20860:5	15	R.ISPDQGQQFAQMLVQ[+0.984]DEEPLADITQIVDVFMEYN[+0.984]LIQQC[+57.021]TAFLLDALKNNRPSEGPLQTR.L		C[+57], N[+1], Q[+1]	1376.69	5	6879.42	6878.36	1	7.6	524	Specific	471.77	471.77	15.4	6.13	13	>sp|Q00610|CLH1_HUMAN Clathrin heavy chain 1 OS=Homo sapiens GN=CLTC PE=1 SV=5	3295	YJC_160818_PC9mem_AALmnp_G_01.18452.18452.5	controllerType=0 controllerNumber=1 scan=18452	118.787
15369:4	15	R.AVVHTHLLNPEWLVNYFGSLSVEDSLEC[+57.021]LR.A		C[+57]	875.188	4	3497.73	3497.75	0	-6.7	639	Specific	184.53	184.53	184.53	1.77	13	>sp|Q00610|CLH1_HUMAN Clathrin heavy chain 1 OS=Homo sapiens GN=CLTC PE=1 SV=5	3295	YJC_160818_PC9mem_AALmnp_G_01.13458.13458.4	controllerType=0 controllerNumber=1 scan=13458	85.7227
15367:4	15	R.AVVHTHLLNPEWLVNYFGSLSVEDSLEC[+57.021]LR.A		C[+57]	875.188	4	3497.73	3497.75	0	-6.7	639	Specific	434.01	262.54	262.54	4.12	13	>sp|Q00610|CLH1_HUMAN Clathrin heavy chain 1 OS=Homo sapiens GN=CLTC PE=1 SV=5	3295	YJC_160818_PC9mem_AALmnp_G_01.13457.13457.4	controllerType=0 controllerNumber=1 scan=13457	85.7201
17293:4	15	K.LTDQLPLIIVC[+57.021]DRFDFVHDLVLYLYR.N		C[+57]	809.934	4	3236.72	3236.72	0	-0.5	768	Specific	478.96	292.24	292.24	5.21	13	>sp|Q00610|CLH1_HUMAN Clathrin heavy chain 1 OS=Homo sapiens GN=CLTC PE=1 SV=5	3295	YJC_160818_PC9mem_AALmnp_G_01.15261.15261.4	controllerType=0 controllerNumber=1 scan=15261	97.3054
17294:4	15	K.LTDQLPLIIVC[+57.021]DRFDFVHDLVLYLYR.N		C[+57]	809.934	4	3236.72	3236.72	0	-0.5	768	Specific	1026.94	966.83	966.83	17.83	13	>sp|Q00610|CLH1_HUMAN Clathrin heavy chain 1 OS=Homo sapiens GN=CLTC PE=1 SV=5	3295	YJC_160818_PC9mem_AALmnp_G_01.15262.15262.4	controllerType=0 controllerNumber=1 scan=15262	97.3113
16727:4	15	K.VNPSRLPVVIGGLLDVDC[+57.021]SEDVIKNLILVVR.G		C[+57]	851.234	4	3401.91	3401.92	0	-1.7	807	Specific	651.89	546.62	546.62	10.55	13	>sp|Q00610|CLH1_HUMAN Clathrin heavy chain 1 OS=Homo sapiens GN=CLTC PE=1 SV=5	3295	YJC_160818_PC9mem_AALmnp_G_01.14765.14765.4	controllerType=0 controllerNumber=1 scan=14765	94.0709
16729:4	15	K.VNPSRLPVVIGGLLDVDC[+57.021]SEDVIKNLILVVR.G		C[+57]	851.234	4	3401.91	3401.92	0	-1.7	807	Specific	933.65	933.65	933.65	15.55	13	>sp|Q00610|CLH1_HUMAN Clathrin heavy chain 1 OS=Homo sapiens GN=CLTC PE=1 SV=5	3295	YJC_160818_PC9mem_AALmnp_G_01.14766.14766.4	controllerType=0 controllerNumber=1 scan=14766	94.0773
17969:4	15	R.VMEYINRLDNYDAPDIANIAISNELFEEAFAIFR.K			994.984	4	3976.91	3976.94	0	-7.3	1040	Specific	424.86	147.26	147.26	1.95	13	>sp|Q00610|CLH1_HUMAN Clathrin heavy chain 1 OS=Homo sapiens GN=CLTC PE=1 SV=5	3295	YJC_160818_PC9mem_AALmnp_G_01.15856.15856.4	controllerType=0 controllerNumber=1 scan=15856	101.116
17971:4	15	R.VMEYINRLDNYDAPDIANIAISNELFEEAFAIFR.K			994.984	4	3976.91	3976.94	0	-7.3	1040	Specific	654.1	609.38	609.38	9.59	13	>sp|Q00610|CLH1_HUMAN Clathrin heavy chain 1 OS=Homo sapiens GN=CLTC PE=1 SV=5	3295	YJC_160818_PC9mem_AALmnp_G_01.15857.15857.4	controllerType=0 controllerNumber=1 scan=15857	101.123
17962:3	15	R.VMEYINRLDNYDAPDIANIAISNELFEEAFAIFR.K			1326.32	3	3976.95	3976.94	0	0.7	1040	Specific	655.41	628.68	628.68	10.5	13	>sp|Q00610|CLH1_HUMAN Clathrin heavy chain 1 OS=Homo sapiens GN=CLTC PE=1 SV=5	3295	YJC_160818_PC9mem_AALmnp_G_01.15850.15850.3	controllerType=0 controllerNumber=1 scan=15850	101.085
17960:3	15	R.VMEYINRLDNYDAPDIANIAISNELFEEAFAIFR.K			1326.32	3	3976.95	3976.94	0	0.7	1040	Specific	748.2	440.19	440.19	10.84	13	>sp|Q00610|CLH1_HUMAN Clathrin heavy chain 1 OS=Homo sapiens GN=CLTC PE=1 SV=5	3295	YJC_160818_PC9mem_AALmnp_G_01.15849.15849.3	controllerType=0 controllerNumber=1 scan=15849	101.081
00540:4	15	R.KAN[+2935.037]STR.T	HexNAc(6)Hex(7)NeuAc(2)	N[+2935]	903.61	4	3611.42	3611.41	0	2.2	1246	Specific	124.89	8.4	8.4	0.09	13	>sp|Q00610|CLH1_HUMAN Clathrin heavy chain 1 OS=Homo sapiens GN=CLTC PE=1 SV=5	3295	YJC_160818_PC9mem_AALmnp_G_01.1312.1312.4	controllerType=0 controllerNumber=1 scan=1312	12.6693
13327:4	15	R.LAQMC[+57.021]GLHIVVHADELEELINYYQDR.G		C[+57]	783.131	4	3129.5	3129.51	0	-3.5	1268	Specific	434.85	402.6	402.6	6.23	13	>sp|Q00610|CLH1_HUMAN Clathrin heavy chain 1 OS=Homo sapiens GN=CLTC PE=1 SV=5	3295	YJC_160818_PC9mem_AALmnp_G_01.11526.11526.4	controllerType=0 controllerNumber=1 scan=11526	73.8807
19663:4	15	K.VANVELYYRAIQFYLEFKPLLLNDLLMVLSPR.L			961.042	4	3841.15	3841.11	0	9	1398	Specific	258.62	108.06	108.06	1.46	13	>sp|Q00610|CLH1_HUMAN Clathrin heavy chain 1 OS=Homo sapiens GN=CLTC PE=1 SV=5	3295	YJC_160818_PC9mem_AALmnp_G_01.17385.17385.2	controllerType=0 controllerNumber=1 scan=17385	111.403
16959:3	16	R.GIPLDFSSSLGIIVKDFETIGQNK.L			860.129	3	2578.37	2578.38	0	-2	56	Specific	360.42	180.29	180.29	4.13	10	>sp|Q9NZM1|MYOF_HUMAN Myoferlin OS=Homo sapiens GN=MYOF PE=1 SV=1	10875	YJC_160818_PC9mem_AALmnp_G_01.14954.14954.3	controllerType=0 controllerNumber=1 scan=14954	95.2763
16961:3	16	R.GIPLDFSSSLGIIVKDFETIGQNK.L			860.129	3	2578.37	2578.38	0	-2	56	Specific	796.23	654.73	654.73	13	10	>sp|Q9NZM1|MYOF_HUMAN Myoferlin OS=Homo sapiens GN=MYOF PE=1 SV=1	10875	YJC_160818_PC9mem_AALmnp_G_01.14955.14955.3	controllerType=0 controllerNumber=1 scan=14955	95.2823
12056:6	16	R.SLLTEADAGHTEFTDEVYQNESRYPGGDWKPAEDTYTDANGDKAASPSELTC[+57.021]PPGWEWEDDAWSYDINR.A		C[+57]	1305.4	6	7827.37	7826.39	1	-3.4	918	Specific	116.73	85.49	11.01	1.52	10	>sp|Q9NZM1|MYOF_HUMAN Myoferlin OS=Homo sapiens GN=MYOF PE=1 SV=1	10875	YJC_160818_PC9mem_AALmnp_G_01.10410.10410.2	controllerType=0 controllerNumber=1 scan=10410	66.9914
12054:6	16	R.SLLTEADAGHTEFTDEVYQNESRYPGGDWKPAEDTYTDANGDKAASPSELTC[+57.021]PPGWEWEDDAWSYDINR.A		C[+57]	1305.4	6	7827.37	7826.39	1	-3.4	918	Specific	510.27	2.8	1.86	1.97	10	>sp|Q9NZM1|MYOF_HUMAN Myoferlin OS=Homo sapiens GN=MYOF PE=1 SV=1	10875	YJC_160818_PC9mem_AALmnp_G_01.10409.10409.2	controllerType=0 controllerNumber=1 scan=10409	66.984
13425:4	16	R.SKTTEIIHSTLNPTWDQTIIFDEVEIYGEPQTVLQNPPK.V			1121.57	4	4483.27	4482.27	1	-0.7	1172	Specific	1122.32	1025.09	296.76	19.52	10	>sp|Q9NZM1|MYOF_HUMAN Myoferlin OS=Homo sapiens GN=MYOF PE=1 SV=1	10875	YJC_160818_PC9mem_AALmnp_G_01.11606.11606.4	controllerType=0 controllerNumber=1 scan=11606	74.3654
13423:4	16	R.SKTTEIIHSTLNPTWDQTIIFDEVEIYGEPQ[+0.984]TVLQNPPK.V		Q[+1]	1121.57	4	4483.27	4483.26	0	3.6	1172	Specific	624.85	301.9	65.14	7.34	10	>sp|Q9NZM1|MYOF_HUMAN Myoferlin OS=Homo sapiens GN=MYOF PE=1 SV=1	10875	YJC_160818_PC9mem_AALmnp_G_01.11605.11605.4	controllerType=0 controllerNumber=1 scan=11605	74.3589
13975:3	16	K.TTEIIHSTLNPTWDQTIIFDEVEIYGEPQTVLQNPPK.V			1423.04	3	4267.11	4267.14	0	-8.1	1174	Specific	565.09	154.48	14.11	3.7	10	>sp|Q9NZM1|MYOF_HUMAN Myoferlin OS=Homo sapiens GN=MYOF PE=1 SV=1	10875	YJC_160818_PC9mem_AALmnp_G_01.12096.12096.3	controllerType=0 controllerNumber=1 scan=12096	77.3265
13976:3	16	K.TTEIIHSTLNPTWDQTIIFDEVEIYGEPQTVLQNPPK.V			1423.04	3	4267.11	4267.14	0	-8.1	1174	Specific	593.95	527.52	45.94	8.15	10	>sp|Q9NZM1|MYOF_HUMAN Myoferlin OS=Homo sapiens GN=MYOF PE=1 SV=1	10875	YJC_160818_PC9mem_AALmnp_G_01.12097.12097.3	controllerType=0 controllerNumber=1 scan=12097	77.3334
17669:3	16	R.APNLYMVPQGIRPVVQLTAIEILAWGLR.N			1040.26	3	3118.76	3118.76	0	-1.3	1287	Specific	758.36	409.99	409.99	12.74	10	>sp|Q9NZM1|MYOF_HUMAN Myoferlin OS=Homo sapiens GN=MYOF PE=1 SV=1	10875	YJC_160818_PC9mem_AALmnp_G_01.15594.15594.3	controllerType=0 controllerNumber=1 scan=15594	99.4426
17671:3	16	R.APNLYMVPQGIRPVVQLTAIEILAWGLR.N			1040.26	3	3118.76	3118.76	0	-1.3	1287	Specific	865.31	854.74	854.74	14.74	10	>sp|Q9NZM1|MYOF_HUMAN Myoferlin OS=Homo sapiens GN=MYOF PE=1 SV=1	10875	YJC_160818_PC9mem_AALmnp_G_01.15595.15595.3	controllerType=0 controllerNumber=1 scan=15595	99.4488
18476:5	16	R.APNLYMVPQGIRPVVQLTAIEILAWGLRNMKNFQMASITSPSLVVEC[+57.021]GGER.V		C[+57]	1131.8	5	5654.95	5654.95	0	0.1	1287	Specific	767.1	715.37	86.52	12.29	10	>sp|Q9NZM1|MYOF_HUMAN Myoferlin OS=Homo sapiens GN=MYOF PE=1 SV=1	10875	YJC_160818_PC9mem_AALmnp_G_01.16328.16328.5	controllerType=0 controllerNumber=1 scan=16328	104.252
18474:5	16	R.APNLYMVPQGIRPVVQLTAIEILAWGLRN[+0.984]MKNFQMASITSPSLVVEC[+57.021]GGER.V		C[+57], N[+1]	1131.8	5	5654.95	5655.93	-1	3.5	1287	Specific	403.83	96.68	7.93	1.51	10	>sp|Q9NZM1|MYOF_HUMAN Myoferlin OS=Homo sapiens GN=MYOF PE=1 SV=1	10875	YJC_160818_PC9mem_AALmnp_G_01.16327.16327.5	controllerType=0 controllerNumber=1 scan=16327	104.248
11826:3	16	K.NFQ[+0.984]MASITSPSLVVEC[+57.021]GGERVESVVIK.N		C[+57], Q[+1]	979.836	3	2937.49	2937.47	0	8.5	1318	Specific	440.98	412.51	55.46	6.03	10	>sp|Q9NZM1|MYOF_HUMAN Myoferlin OS=Homo sapiens GN=MYOF PE=1 SV=1	10875	YJC_160818_PC9mem_AALmnp_G_01.10222.10222.3	controllerType=0 controllerNumber=1 scan=10222	65.8201
17121:3	16	R.LIIQIWDNDKFSLDDYLGFLELDLR.H			1018.86	3	3054.58	3054.58	0	-1.9	1883	Specific	387.81	219.75	219.75	3.68	10	>sp|Q9NZM1|MYOF_HUMAN Myoferlin OS=Homo sapiens GN=MYOF PE=1 SV=1	10875	YJC_160818_PC9mem_AALmnp_G_01.15106.15106.3	controllerType=0 controllerNumber=1 scan=15106	96.2708
17123:3	16	R.LIIQIWDNDKFSLDDYLGFLELDLR.H			1018.86	3	3054.58	3054.58	0	-1.9	1883	Specific	583.94	559.15	559.15	8.88	10	>sp|Q9NZM1|MYOF_HUMAN Myoferlin OS=Homo sapiens GN=MYOF PE=1 SV=1	10875	YJC_160818_PC9mem_AALmnp_G_01.15107.15107.3	controllerType=0 controllerNumber=1 scan=15107	96.2748
14989:3	17	K.RAEDYPIDLYYLMDLSYSMKDDLENVK.S			1100.52	3	3299.55	3299.55	0	-0.7	137	Specific	747.44	528.07	528.07	11.08	27	>sp|P05556|ITB1_HUMAN Integrin beta-1 OS=Homo sapiens GN=ITGB1 PE=1 SV=2	8370	YJC_160818_PC9mem_AALmnp_G_01.13101.13101.3	controllerType=0 controllerNumber=1 scan=13101	83.5577
14991:3	17	K.RAEDYPIDLYYLMDLSYSMKDDLENVK.S			1100.52	3	3299.55	3299.55	0	-0.7	137	Specific	835.8	772.27	772.27	13.47	27	>sp|P05556|ITB1_HUMAN Integrin beta-1 OS=Homo sapiens GN=ITGB1 PE=1 SV=2	8370	YJC_160818_PC9mem_AALmnp_G_01.13102.13102.3	controllerType=0 controllerNumber=1 scan=13102	83.5612
04000:3	17	K.LRNPC[+57.021]TSEQN[+2278.809]C[+57.021]TSPFSYK.N	HexNAc(5)Hex(6)NeuAc(1)	C[+57]*2, N[+2279]	1490.27	3	4468.79	4467.78	1	0.5	203	Specific	251.89	88.74	0.58	3.97	27	>sp|P05556|ITB1_HUMAN Integrin beta-1 OS=Homo sapiens GN=ITGB1 PE=1 SV=2	8370	YJC_160818_PC9mem_AALmnp_G_01.4003.4003.3	controllerType=0 controllerNumber=1 scan=4003	29.1469
04490:3	17	K.LRNPC[+57.021]TSEQN[+2205.793]C[+57.021]TSPFSYK.N	HexNAc(4)Hex(5)Fuc(2)NeuAc(1)	C[+57]*2, N[+2206]	1465.59	3	4394.76	4394.77	0	-2.6	203	Specific	333.73	152.47	10.82	4.97	27	>sp|P05556|ITB1_HUMAN Integrin beta-1 OS=Homo sapiens GN=ITGB1 PE=1 SV=2	8370	YJC_160818_PC9mem_AALmnp_G_01.4414.4414.3	controllerType=0 controllerNumber=1 scan=4414	31.4953
04074:3	17	K.LRNPC[+57.021]TSEQN[+1914.697]C[+57.021]TSPFSYK.N	HexNAc(4)Hex(5)Fuc(2)	C[+57]*2, N[+1915]	1368.56	3	4103.66	4103.67	0	-2.6	203	Specific	498.69	304.92	30.34	6.15	27	>sp|P05556|ITB1_HUMAN Integrin beta-1 OS=Homo sapiens GN=ITGB1 PE=1 SV=2	8370	YJC_160818_PC9mem_AALmnp_G_01.4062.4062.3	controllerType=0 controllerNumber=1 scan=4062	29.4611
04423:3	17	K.LRNPC[+57.021]TSEQN[+349.137]C[+57.021]TSPFSYK.N	HexNAc(1)Fuc(1)	C[+57]*2, N[+349]	846.706	3	2538.1	2538.11	0	-3.7	203	Specific	551.2	419.28	419.28	7.79	27	>sp|P05556|ITB1_HUMAN Integrin beta-1 OS=Homo sapiens GN=ITGB1 PE=1 SV=2	8370	YJC_160818_PC9mem_AALmnp_G_01.4365.4365.3	controllerType=0 controllerNumber=1 scan=4365	31.2148
03910:3	17	K.LRN[+0.984]PC[+57.021]TSEQN[+1647.613]C[+57.021]TSPFSYK.N	HexNAc(5)Hex(3)Fuc(1)	C[+57]*2, N[+1][+1648]	1279.85	3	3837.54	3837.57	0	-8.8	203	Specific	140.95	70.14	10.56	2.4	27	>sp|P05556|ITB1_HUMAN Integrin beta-1 OS=Homo sapiens GN=ITGB1 PE=1 SV=2	8370	YJC_160818_PC9mem_AALmnp_G_01.3929.3929.3	controllerType=0 controllerNumber=1 scan=3929	28.7224
03909:3	17	R.NPC[+57.021]TSEQN[+1914.697]C[+57.021]TSPFSYK.N	HexNAc(4)Hex(5)Fuc(2)	C[+57]*2, N[+1915]	1278.83	3	3834.49	3834.49	0	-0.5	205	Specific	314.12	194.37	113.35	4.31	27	>sp|P05556|ITB1_HUMAN Integrin beta-1 OS=Homo sapiens GN=ITGB1 PE=1 SV=2	8370	YJC_160818_PC9mem_AALmnp_G_01.3929.3929.3	controllerType=0 controllerNumber=1 scan=3929	28.7224
10173:2	17	K.NVLSLTNKGEVFNELVGK.Q			981.038	2	1961.07	1961.07	0	-0.6	221	Specific	303.84	218.8	218.8	3.94	27	>sp|P05556|ITB1_HUMAN Integrin beta-1 OS=Homo sapiens GN=ITGB1 PE=1 SV=2	8370	YJC_160818_PC9mem_AALmnp_G_01.8838.8838.2	controllerType=0 controllerNumber=1 scan=8838	57.9021
10171:2	17	K.NVLSLTNKGEVFNELVGK.Q			981.038	2	1961.07	1961.07	0	-0.6	221	Specific	422.55	308.19	308.19	5.33	27	>sp|P05556|ITB1_HUMAN Integrin beta-1 OS=Homo sapiens GN=ITGB1 PE=1 SV=2	8370	YJC_160818_PC9mem_AALmnp_G_01.8837.8837.2	controllerType=0 controllerNumber=1 scan=8837	57.8947
16359:3	17	R.ISGNLDSPEGGFDAIMQVAVC[+57.021]GSLIGWR.N		C[+57]	983.816	3	2949.43	2949.42	0	3.8	241	Specific	273.35	49.19	49.19	0.11	27	>sp|P05556|ITB1_HUMAN Integrin beta-1 OS=Homo sapiens GN=ITGB1 PE=1 SV=2	8370	YJC_160818_PC9mem_AALmnp_G_01.14424.14424.3	controllerType=0 controllerNumber=1 scan=14424	91.9046
16361:3	17	R.ISGNLDSPEGGFDAIMQVAVC[+57.021]GSLIGWR.N		C[+57]	983.816	3	2949.43	2949.42	0	3.8	241	Specific	679.37	583.83	583.83	9.91	27	>sp|P05556|ITB1_HUMAN Integrin beta-1 OS=Homo sapiens GN=ITGB1 PE=1 SV=2	8370	YJC_160818_PC9mem_AALmnp_G_01.14425.14425.3	controllerType=0 controllerNumber=1 scan=14425	91.9121
14101:3	17	K.LSENNIQTIFAVTEEFQPVYK.E			824.087	3	2470.25	2470.25	0	-1.9	326	Specific	333.41	144.57	144.57	3.26	27	>sp|P05556|ITB1_HUMAN Integrin beta-1 OS=Homo sapiens GN=ITGB1 PE=1 SV=2	8370	YJC_160818_PC9mem_AALmnp_G_01.12207.12207.3	controllerType=0 controllerNumber=1 scan=12207	77.9964
14103:3	17	K.LSENNIQTIFAVTEEFQPVYK.E			824.087	3	2470.25	2470.25	0	-1.9	326	Specific	533.05	475.18	475.18	6.97	27	>sp|P05556|ITB1_HUMAN Integrin beta-1 OS=Homo sapiens GN=ITGB1 PE=1 SV=2	8370	YJC_160818_PC9mem_AALmnp_G_01.12208.12208.3	controllerType=0 controllerNumber=1 scan=12208	78.0022
14081:3	17	K.LSENNIQTIFAVTEEFQPVYKELK.N			947.492	3	2840.46	2840.47	0	-3.8	326	Specific	388.49	191.4	191.4	3.65	27	>sp|P05556|ITB1_HUMAN Integrin beta-1 OS=Homo sapiens GN=ITGB1 PE=1 SV=2	8370	YJC_160818_PC9mem_AALmnp_G_01.12193.12193.3	controllerType=0 controllerNumber=1 scan=12193	77.917
14083:3	17	K.LSENNIQTIFAVTEEFQPVYKELK.N			947.492	3	2840.46	2840.47	0	-3.8	326	Specific	732.81	675.85	675.85	11.91	27	>sp|P05556|ITB1_HUMAN Integrin beta-1 OS=Homo sapiens GN=ITGB1 PE=1 SV=2	8370	YJC_160818_PC9mem_AALmnp_G_01.12194.12194.3	controllerType=0 controllerNumber=1 scan=12194	77.9207
16821:4	17	K.IRPLGFTEEVEVILQYIC[+57.021]EC[+57.021]EC[+57.021]QSEGIPESPK.C		C[+57]*3	953.208	4	3809.81	3809.81	0	0.8	445	Specific	372.73	125.04	125.04	1.74	27	>sp|P05556|ITB1_HUMAN Integrin beta-1 OS=Homo sapiens GN=ITGB1 PE=1 SV=2	8370	YJC_160818_PC9mem_AALmnp_G_01.14848.14848.2	controllerType=0 controllerNumber=1 scan=14848	94.601
16823:4	17	K.IRPLGFTEEVEVILQYIC[+57.021]EC[+57.021]EC[+57.021]QSEGIPESPK.C		C[+57]*3	953.208	4	3809.81	3809.81	0	0.8	445	Specific	381.85	367.94	367.94	4.43	27	>sp|P05556|ITB1_HUMAN Integrin beta-1 OS=Homo sapiens GN=ITGB1 PE=1 SV=2	8370	YJC_160818_PC9mem_AALmnp_G_01.14849.14849.2	controllerType=0 controllerNumber=1 scan=14849	94.6086
17428:9	17	R.VC[+57.021]EC[+57.021]NPN[+2081.717]YTGSAC[+57.021]DC[+57.021]SLDTSTC[+57.021]EASNGQIC[+57.021]NGRGIC[+57.021]EC[+57.021]GVC[+57.021]K.C	HexNAc(4)Hex(5)Fuc(1)NeuAc(1)Na(1)	C[+57]*9, N[+2082]	767.737	9	6901.57	6902.58	-1	-0.2	578	Specific	290.31	9.43	9.43	0.09	27	>sp|P05556|ITB1_HUMAN Integrin beta-1 OS=Homo sapiens GN=ITGB1 PE=1 SV=2	8370	YJC_160818_PC9mem_AALmnp_G_01.15375.15375.6	controllerType=0 controllerNumber=1 scan=15375	98.0012
05079:3	17	K.KDTC[+57.021]TQEC[+57.021]SYFN[+2569.905]ITK.V	HexNAc(5)Hex(6)NeuAc(2)	C[+57]*2, N[+2570]	1489.25	3	4465.75	4464.74	1	2	658	Specific	130.33	3.92	2.73	1.78	27	>sp|P05556|ITB1_HUMAN Integrin beta-1 OS=Homo sapiens GN=ITGB1 PE=1 SV=2	8370	YJC_160818_PC9mem_AALmnp_G_01.4864.4864.3	controllerType=0 controllerNumber=1 scan=4864	34.1278
04473:3	17	K.KDTC[+57.021]TQEC[+57.021]SYFN[+1914.697]ITK.V	HexNAc(4)Hex(5)Fuc(2)	C[+57]*2, N[+1915]	1270.51	3	3809.52	3809.53	0	-2.3	658	Specific	254.34	95.08	95.08	4.19	27	>sp|P05556|ITB1_HUMAN Integrin beta-1 OS=Homo sapiens GN=ITGB1 PE=1 SV=2	8370	YJC_160818_PC9mem_AALmnp_G_01.4403.4403.3	controllerType=0 controllerNumber=1 scan=4403	31.4344
06317:4	17	K.KDTC[+57.021]TQEC[+57.021]SYFN[+3008.078]ITKVESR.D	HexNAc(5)Hex(6)Fuc(3)NeuAc(2)	C[+57]*2, N[+3008]	1344.29	4	5374.15	5374.15	0	0.2	658	Specific	123.29	33.75	9.57	1.47	27	>sp|P05556|ITB1_HUMAN Integrin beta-1 OS=Homo sapiens GN=ITGB1 PE=1 SV=2	8370	YJC_160818_PC9mem_AALmnp_G_01.5790.5790.4	controllerType=0 controllerNumber=1 scan=5790	39.8567
05106:4	17	K.KDTC[+57.021]TQEC[+57.021]SYFN[+2279.830]ITKVESR.D	HexNAc(5)Hex(6)Fuc(2)	C[+57]*2, N[+2280]	1162.23	4	4645.9	4645.9	0	-0.8	658	Specific	154.55	36.63	36.63	1.74	27	>sp|P05556|ITB1_HUMAN Integrin beta-1 OS=Homo sapiens GN=ITGB1 PE=1 SV=2	8370	YJC_160818_PC9mem_AALmnp_G_01.4886.4886.4	controllerType=0 controllerNumber=1 scan=4886	34.2681
05739:3	17	K.KDTC[+57.021]TQEC[+57.021]SYFN[+2350.830]ITKVESR.D	HexNAc(4)Hex(5)Fuc(1)NeuAc(2)	C[+57]*2, N[+2351]	1573.31	3	4717.91	4716.91	1	0.8	658	Specific	224.9	89.78	4.15	3.8	27	>sp|P05556|ITB1_HUMAN Integrin beta-1 OS=Homo sapiens GN=ITGB1 PE=1 SV=2	8370	YJC_160818_PC9mem_AALmnp_G_01.5358.5358.3	controllerType=0 controllerNumber=1 scan=5358	37.1702
05718:4	17	K.KDTC[+57.021]TQEC[+57.021]SYFN[+2205.793]ITKVESR.D	HexNAc(4)Hex(5)Fuc(2)NeuAc(1)	C[+57]*2, N[+2206]	1143.47	4	4570.86	4571.87	-1	-1.7	658	Specific	242.89	52.98	40.16	3.59	27	>sp|P05556|ITB1_HUMAN Integrin beta-1 OS=Homo sapiens GN=ITGB1 PE=1 SV=2	8370	YJC_160818_PC9mem_AALmnp_G_01.5343.5343.4	controllerType=0 controllerNumber=1 scan=5343	37.0968
05153:3	17	K.KDTC[+57.021]TQEC[+57.021]SYFN[+1914.697]ITKVESR.D	HexNAc(4)Hex(5)Fuc(2)	C[+57]*2, N[+1915]	1427.6	3	4280.78	4280.77	0	1.2	658	Specific	265.79	154.33	21.35	4.26	27	>sp|P05556|ITB1_HUMAN Integrin beta-1 OS=Homo sapiens GN=ITGB1 PE=1 SV=2	8370	YJC_160818_PC9mem_AALmnp_G_01.4927.4927.3	controllerType=0 controllerNumber=1 scan=4927	34.5384
05708:4	17	K.KDTC[+57.021]TQEC[+57.021]SYFN[+2351.851]ITKVESR.D	HexNAc(4)Hex(5)Fuc(3)NeuAc(1)	C[+57]*2, N[+2352]	1180.24	4	4717.92	4717.93	0	-0.7	658	Specific	301.76	77.66	6.03	3.66	27	>sp|P05556|ITB1_HUMAN Integrin beta-1 OS=Homo sapiens GN=ITGB1 PE=1 SV=2	8370	YJC_160818_PC9mem_AALmnp_G_01.5336.5336.4	controllerType=0 controllerNumber=1 scan=5336	37.0561
05734:3	17	K.KDTC[+57.021]TQEC[+57.021]SYFN[+2205.793]ITKVESR.D	HexNAc(4)Hex(5)Fuc(2)NeuAc(1)	C[+57]*2, N[+2206]	1524.62	3	4571.85	4571.87	0	-2.9	658	Specific	335.82	118.81	16.53	4.48	27	>sp|P05556|ITB1_HUMAN Integrin beta-1 OS=Homo sapiens GN=ITGB1 PE=1 SV=2	8370	YJC_160818_PC9mem_AALmnp_G_01.5354.5354.3	controllerType=0 controllerNumber=1 scan=5354	37.1533
06718:3	17	K.DTC[+57.021]TQEC[+57.021]SYFN[+2205.793]ITKVESR.D	HexNAc(4)Hex(5)Fuc(2)NeuAc(1)	C[+57]*2, N[+2206]	1481.93	3	4443.77	4443.77	0	-0.3	659	Specific	179.25	51.67	19.18	2.97	27	>sp|P05556|ITB1_HUMAN Integrin beta-1 OS=Homo sapiens GN=ITGB1 PE=1 SV=2	8370	YJC_160818_PC9mem_AALmnp_G_01.6093.6093.3	controllerType=0 controllerNumber=1 scan=6093	41.6813
06278:3	17	K.DTC[+57.021]TQEC[+57.021]SYFN[+1768.640]ITKVESR.D	HexNAc(4)Hex(5)Fuc(1)	C[+57]*2, N[+1769]	1336.54	3	4007.6	4006.62	1	-6.5	659	Specific	191.19	62.97	62.97	2.86	27	>sp|P05556|ITB1_HUMAN Integrin beta-1 OS=Homo sapiens GN=ITGB1 PE=1 SV=2	8370	YJC_160818_PC9mem_AALmnp_G_01.5759.5759.3	controllerType=0 controllerNumber=1 scan=5759	39.6798
06207:4	17	K.DTC[+57.021]TQEC[+57.021]SYFN[+1914.697]ITKVESR.D	HexNAc(4)Hex(5)Fuc(2)	C[+57]*2, N[+1915]	1038.92	4	4152.67	4152.68	0	-1.4	659	Specific	213.01	78.38	35.1	2.68	27	>sp|P05556|ITB1_HUMAN Integrin beta-1 OS=Homo sapiens GN=ITGB1 PE=1 SV=2	8370	YJC_160818_PC9mem_AALmnp_G_01.5712.5712.4	controllerType=0 controllerNumber=1 scan=5712	39.3897
06722:4	17	K.DTC[+57.021]TQEC[+57.021]SYFN[+2205.793]ITKVESR.D	HexNAc(4)Hex(5)Fuc(2)NeuAc(1)	C[+57]*2, N[+2206]	1111.45	4	4442.77	4443.77	-1	0.5	659	Specific	237.63	84.86	42.82	3.37	27	>sp|P05556|ITB1_HUMAN Integrin beta-1 OS=Homo sapiens GN=ITGB1 PE=1 SV=2	8370	YJC_160818_PC9mem_AALmnp_G_01.6095.6095.4	controllerType=0 controllerNumber=1 scan=6095	41.6904
06712:3	17	K.DTC[+57.021]TQEC[+57.021]SYFN[+2350.830]ITKVESR.D	HexNAc(4)Hex(5)Fuc(1)NeuAc(2)	C[+57]*2, N[+2351]	1530.61	3	4589.8	4588.81	1	-2.7	659	Specific	251.83	81.78	9.2	4.23	27	>sp|P05556|ITB1_HUMAN Integrin beta-1 OS=Homo sapiens GN=ITGB1 PE=1 SV=2	8370	YJC_160818_PC9mem_AALmnp_G_01.6087.6087.3	controllerType=0 controllerNumber=1 scan=6087	41.6423
06191:3	17	K.DTC[+57.021]TQEC[+57.021]SYFN[+2059.735]ITKVESR.D	HexNAc(4)Hex(5)Fuc(1)NeuAc(1)	C[+57]*2, N[+2060]	1433.59	3	4298.74	4297.72	1	5.3	659	Specific	252.54	104.8	2.1	3.95	27	>sp|P05556|ITB1_HUMAN Integrin beta-1 OS=Homo sapiens GN=ITGB1 PE=1 SV=2	8370	YJC_160818_PC9mem_AALmnp_G_01.5697.5697.3	controllerType=0 controllerNumber=1 scan=5697	39.2903
06201:3	17	K.DTC[+57.021]TQEC[+57.021]SYFN[+1914.697]ITKVESR.D	HexNAc(4)Hex(5)Fuc(2)	C[+57]*2, N[+1915]	1384.9	3	4152.67	4152.68	0	-1.6	659	Specific	397.67	232.68	2.87	5.22	27	>sp|P05556|ITB1_HUMAN Integrin beta-1 OS=Homo sapiens GN=ITGB1 PE=1 SV=2	8370	YJC_160818_PC9mem_AALmnp_G_01.5707.5707.3	controllerType=0 controllerNumber=1 scan=5707	39.3591
22733:4	18	K.YQFVREPEDEEEEEEEEEEDEDEDLEELEVLER.K			1047.44	4	4186.74	4186.73	0	4.1	25	Specific	277.8	143.85	143.85	2.79	9	>sp|Q9NQC3|RTN4_HUMAN Reticulon-4 OS=Homo sapiens GN=RTN4 PE=1 SV=2	15034	YJC_160818_PC9mem_AALmnp_G_01.20905.20905.4	controllerType=0 controllerNumber=1 scan=20905	141.391
22600:3	18	K.YQFVREPEDEEEEEEEEEEDEDEDLEELEVLER.K			1396.25	3	4186.73	4186.73	0	0.9	25	Specific	350.42	350.42	196.86	5.46	9	>sp|Q9NQC3|RTN4_HUMAN Reticulon-4 OS=Homo sapiens GN=RTN4 PE=1 SV=2	15034	YJC_160818_PC9mem_AALmnp_G_01.19973.19973.3	controllerType=0 controllerNumber=1 scan=19973	129.083
11806:4	18	K.YQFVREPEDEEEEEEEEEEDEDEDLEELEVLER.K			1047.69	4	4187.72	4186.73	1	-2.5	25	Specific	351.78	265.2	230.17	4.35	9	>sp|Q9NQC3|RTN4_HUMAN Reticulon-4 OS=Homo sapiens GN=RTN4 PE=1 SV=2	15034	YJC_160818_PC9mem_AALmnp_G_01.10206.10206.4	controllerType=0 controllerNumber=1 scan=10206	65.72
11804:4	18	K.YQFVREPEDEEEEEEEEEEDEDEDLEELEVLER.K			1047.69	4	4187.72	4186.73	1	-2.5	25	Specific	370.09	61.33	61.33	1.46	9	>sp|Q9NQC3|RTN4_HUMAN Reticulon-4 OS=Homo sapiens GN=RTN4 PE=1 SV=2	15034	YJC_160818_PC9mem_AALmnp_G_01.10205.10205.4	controllerType=0 controllerNumber=1 scan=10205	65.7172
21278:3	18	K.YQFVREPEDEEEEEEEEEEDEDEDLEELEVLER.K			1396.25	3	4186.73	4186.73	0	1.3	25	Specific	388.11	283.65	173.69	5.1	9	>sp|Q9NQC3|RTN4_HUMAN Reticulon-4 OS=Homo sapiens GN=RTN4 PE=1 SV=2	15034	YJC_160818_PC9mem_AALmnp_G_01.18841.18841.3	controllerType=0 controllerNumber=1 scan=18841	121.492
11130:4	18	K.YQFVREPEDEEEEEEEEEEDEDEDLEELEVLER.K			1047.43	4	4186.71	4186.73	0	-2.9	25	Specific	425.72	162.66	162.66	3.18	9	>sp|Q9NQC3|RTN4_HUMAN Reticulon-4 OS=Homo sapiens GN=RTN4 PE=1 SV=2	15034	YJC_160818_PC9mem_AALmnp_G_01.9650.9650.4	controllerType=0 controllerNumber=1 scan=9650	62.6647
11132:4	18	K.YQFVREPEDEEEEEEEEEEDEDEDLEELEVLER.K			1047.43	4	4186.71	4186.73	0	-2.9	25	Specific	427.63	316.26	232.5	4.72	9	>sp|Q9NQC3|RTN4_HUMAN Reticulon-4 OS=Homo sapiens GN=RTN4 PE=1 SV=2	15034	YJC_160818_PC9mem_AALmnp_G_01.9651.9651.4	controllerType=0 controllerNumber=1 scan=9651	62.6674
20815:3	18	K.YQFVREPEDEEEEEEEEEEDEDEDLEELEVLER.K			1396.25	3	4186.73	4186.73	0	0.9	25	Specific	481.25	338.72	236.49	5.81	9	>sp|Q9NQC3|RTN4_HUMAN Reticulon-4 OS=Homo sapiens GN=RTN4 PE=1 SV=2	15034	YJC_160818_PC9mem_AALmnp_G_01.18409.18409.3	controllerType=0 controllerNumber=1 scan=18409	118.478
22194:3	18	K.YQFVREPEDEEEEEEEEEEDEDEDLEELEVLER.K			1396.24	3	4186.72	4186.73	0	-2.6	25	Specific	501.7	390.25	262.33	7.27	9	>sp|Q9NQC3|RTN4_HUMAN Reticulon-4 OS=Homo sapiens GN=RTN4 PE=1 SV=2	15034	YJC_160818_PC9mem_AALmnp_G_01.19549.19549.3	controllerType=0 controllerNumber=1 scan=19549	126.073
18720:3	18	K.YQFVREPEDEEEEEEEEEEDEDEDLEELEVLER.K			1395.91	3	4185.71	4186.73	-1	-3.9	25	Specific	521	355.52	355.52	6.16	9	>sp|Q9NQC3|RTN4_HUMAN Reticulon-4 OS=Homo sapiens GN=RTN4 PE=1 SV=2	15034	YJC_160818_PC9mem_AALmnp_G_01.16543.16543.3	controllerType=0 controllerNumber=1 scan=16543	105.729
20315:3	18	K.YQFVREPEDEEEEEEEEEEDEDEDLEELEVLER.K			1396.26	3	4186.76	4186.73	0	7.7	25	Specific	553.39	486.54	486.54	7.27	9	>sp|Q9NQC3|RTN4_HUMAN Reticulon-4 OS=Homo sapiens GN=RTN4 PE=1 SV=2	15034	YJC_160818_PC9mem_AALmnp_G_01.17969.17969.3	controllerType=0 controllerNumber=1 scan=17969	115.452
10458:3	18	K.YQFVREPEDEEEEEEEEEEDEDEDLEELEVLER.K			1395.91	3	4185.71	4186.73	-1	-2.4	25	Specific	557.97	417.32	417.32	7.51	9	>sp|Q9NQC3|RTN4_HUMAN Reticulon-4 OS=Homo sapiens GN=RTN4 PE=1 SV=2	15034	YJC_160818_PC9mem_AALmnp_G_01.9077.9077.3	controllerType=0 controllerNumber=1 scan=9077	59.3791
17660:3	18	K.YQFVREPEDEEEEEEEEEEDEDEDLEELEVLER.K			1396.24	3	4186.72	4186.73	0	-1.6	25	Specific	558.49	412.99	288.22	7.66	9	>sp|Q9NQC3|RTN4_HUMAN Reticulon-4 OS=Homo sapiens GN=RTN4 PE=1 SV=2	15034	YJC_160818_PC9mem_AALmnp_G_01.15586.15586.3	controllerType=0 controllerNumber=1 scan=15586	99.3827
19241:3	18	K.YQFVREPEDEEEEEEEEEEDEDEDLEELEVLER.K			1396.24	3	4186.71	4186.73	0	-4.9	25	Specific	571.95	436.05	267.07	7.58	9	>sp|Q9NQC3|RTN4_HUMAN Reticulon-4 OS=Homo sapiens GN=RTN4 PE=1 SV=2	15034	YJC_160818_PC9mem_AALmnp_G_01.17000.17000.3	controllerType=0 controllerNumber=1 scan=17000	108.795
11058:3	18	K.YQFVREPEDEEEEEEEEEEDEDEDLEELEVLER.K			1396.24	3	4186.71	4186.73	0	-3.1	25	Specific	586.9	410.02	289.65	8.66	9	>sp|Q9NQC3|RTN4_HUMAN Reticulon-4 OS=Homo sapiens GN=RTN4 PE=1 SV=2	15034	YJC_160818_PC9mem_AALmnp_G_01.9601.9601.3	controllerType=0 controllerNumber=1 scan=9601	62.4496
17112:3	18	K.YQFVREPEDEEEEEEEEEEDEDEDLEELEVLER.K			1396.26	3	4186.75	4186.73	0	6.5	25	Specific	589.3	515.64	515.64	7.99	9	>sp|Q9NQC3|RTN4_HUMAN Reticulon-4 OS=Homo sapiens GN=RTN4 PE=1 SV=2	15034	YJC_160818_PC9mem_AALmnp_G_01.15098.15098.3	controllerType=0 controllerNumber=1 scan=15098	96.2163
15880:3	18	K.YQFVREPEDEEEEEEEEEEDEDEDLEELEVLER.K			1396.58	3	4187.73	4186.73	1	-0.6	25	Specific	606.28	443.67	291.35	9.58	9	>sp|Q9NQC3|RTN4_HUMAN Reticulon-4 OS=Homo sapiens GN=RTN4 PE=1 SV=2	15034	YJC_160818_PC9mem_AALmnp_G_01.13943.13943.3	controllerType=0 controllerNumber=1 scan=13943	88.8379
23049:4	18	K.YQFVREPEDEEEEEEEEEEDEDEDLEELEVLER.K			1047.44	4	4186.73	4186.73	0	0.3	25	Specific	631.85	474.95	174.2	8.58	9	>sp|Q9NQC3|RTN4_HUMAN Reticulon-4 OS=Homo sapiens GN=RTN4 PE=1 SV=2	15034	YJC_160818_PC9mem_AALmnp_G_01.21339.21339.4	controllerType=0 controllerNumber=1 scan=21339	145.224
18154:3	18	K.YQFVREPEDEEEEEEEEEEDEDEDLEELEVLER.K			1395.91	3	4185.72	4186.73	-1	-0.1	25	Specific	632.66	491.2	491.2	9.31	9	>sp|Q9NQC3|RTN4_HUMAN Reticulon-4 OS=Homo sapiens GN=RTN4 PE=1 SV=2	15034	YJC_160818_PC9mem_AALmnp_G_01.16044.16044.3	controllerType=0 controllerNumber=1 scan=16044	102.4
11277:5	18	K.YQFVREPEDEEEEEEEEEEDEDEDLEELEVLER.K			838.148	5	4186.71	4186.73	0	-3.3	25	Specific	652.96	396.86	144.58	9.15	9	>sp|Q9NQC3|RTN4_HUMAN Reticulon-4 OS=Homo sapiens GN=RTN4 PE=1 SV=2	15034	YJC_160818_PC9mem_AALmnp_G_01.9763.9763.5	controllerType=0 controllerNumber=1 scan=9763	63.251
12332:3	18	K.YQFVREPEDEEEEEEEEEEDEDEDLEELEVLER.K			1396.24	3	4186.71	4186.73	0	-3.7	25	Specific	669.58	526.28	321.71	10.66	9	>sp|Q9NQC3|RTN4_HUMAN Reticulon-4 OS=Homo sapiens GN=RTN4 PE=1 SV=2	15034	YJC_160818_PC9mem_AALmnp_G_01.10656.10656.3	controllerType=0 controllerNumber=1 scan=10656	68.4724
21277:3	18	K.YQFVREPEDEEEEEEEEEEDEDEDLEELEVLER.K			1396.25	3	4186.73	4186.73	0	1.3	25	Specific	694	383.99	205.74	9.51	9	>sp|Q9NQC3|RTN4_HUMAN Reticulon-4 OS=Homo sapiens GN=RTN4 PE=1 SV=2	15034	YJC_160818_PC9mem_AALmnp_G_01.18840.18840.3	controllerType=0 controllerNumber=1 scan=18840	121.483
14772:3	18	K.YQFVREPEDEEEEEEEEEEDEDEDLEELEVLER.K			1396.25	3	4186.74	4186.73	0	3.7	25	Specific	694.14	548.98	343.31	10.35	9	>sp|Q9NQC3|RTN4_HUMAN Reticulon-4 OS=Homo sapiens GN=RTN4 PE=1 SV=2	15034	YJC_160818_PC9mem_AALmnp_G_01.12895.12895.3	controllerType=0 controllerNumber=1 scan=12895	82.2614
22192:3	18	K.YQFVREPEDEEEEEEEEEEDEDEDLEELEVLER.K			1396.24	3	4186.72	4186.73	0	-2.6	25	Specific	698.26	372.97	170.51	9.49	9	>sp|Q9NQC3|RTN4_HUMAN Reticulon-4 OS=Homo sapiens GN=RTN4 PE=1 SV=2	15034	YJC_160818_PC9mem_AALmnp_G_01.19548.19548.3	controllerType=0 controllerNumber=1 scan=19548	126.067
11730:3	18	K.YQFVREPEDEEEEEEEEEEDEDEDLEELEVLER.K			1396.25	3	4186.72	4186.73	0	-0.9	25	Specific	701.61	522.07	311.91	11.58	9	>sp|Q9NQC3|RTN4_HUMAN Reticulon-4 OS=Homo sapiens GN=RTN4 PE=1 SV=2	15034	YJC_160818_PC9mem_AALmnp_G_01.10155.10155.3	controllerType=0 controllerNumber=1 scan=10155	65.4571
22700:3	18	K.YQFVREPEDEEEEEEEEEEDEDEDLEELEVLER.K			1396.25	3	4186.74	4186.73	0	4.2	25	Specific	715.26	497.5	75.18	10.91	9	>sp|Q9NQC3|RTN4_HUMAN Reticulon-4 OS=Homo sapiens GN=RTN4 PE=1 SV=2	15034	YJC_160818_PC9mem_AALmnp_G_01.20881.20881.3	controllerType=0 controllerNumber=1 scan=20881	141.281
17111:3	18	K.YQFVREPEDEEEEEEEEEEDEDEDLEELEVLER.K			1396.26	3	4186.75	4186.73	0	6.5	25	Specific	715.94	372.12	372.12	9.73	9	>sp|Q9NQC3|RTN4_HUMAN Reticulon-4 OS=Homo sapiens GN=RTN4 PE=1 SV=2	15034	YJC_160818_PC9mem_AALmnp_G_01.15097.15097.3	controllerType=0 controllerNumber=1 scan=15097	96.2085
20313:3	18	K.YQFVREPEDEEEEEEEEEEDEDEDLEELEVLER.K			1396.26	3	4186.76	4186.73	0	7.7	25	Specific	722.13	382.69	382.69	10.42	9	>sp|Q9NQC3|RTN4_HUMAN Reticulon-4 OS=Homo sapiens GN=RTN4 PE=1 SV=2	15034	YJC_160818_PC9mem_AALmnp_G_01.17968.17968.3	controllerType=0 controllerNumber=1 scan=17968	115.447
18718:3	18	K.YQFVREPEDEEEEEEEEEEDEDEDLEELEVLER.K			1395.91	3	4185.71	4186.73	-1	-3.9	25	Specific	728.6	408.46	408.46	10.56	9	>sp|Q9NQC3|RTN4_HUMAN Reticulon-4 OS=Homo sapiens GN=RTN4 PE=1 SV=2	15034	YJC_160818_PC9mem_AALmnp_G_01.16542.16542.3	controllerType=0 controllerNumber=1 scan=16542	105.72
20813:3	18	K.YQFVREPEDEEEEEEEEEEDEDEDLEELEVLER.K			1396.25	3	4186.73	4186.73	0	0.9	25	Specific	736.83	407.1	195.48	11.03	9	>sp|Q9NQC3|RTN4_HUMAN Reticulon-4 OS=Homo sapiens GN=RTN4 PE=1 SV=2	15034	YJC_160818_PC9mem_AALmnp_G_01.18408.18408.3	controllerType=0 controllerNumber=1 scan=18408	118.47
11279:5	18	K.YQFVREPEDEEEEEEEEEEDEDEDLEELEVLER.K			838.148	5	4186.71	4186.73	0	-3.3	25	Specific	738.46	738.46	432.23	10.77	9	>sp|Q9NQC3|RTN4_HUMAN Reticulon-4 OS=Homo sapiens GN=RTN4 PE=1 SV=2	15034	YJC_160818_PC9mem_AALmnp_G_01.9764.9764.5	controllerType=0 controllerNumber=1 scan=9764	63.2568
12916:3	18	K.YQFVREPEDEEEEEEEEEEDEDEDLEELEVLER.K			1396.24	3	4186.71	4186.73	0	-3.4	25	Specific	744.74	589.19	342.69	11.66	9	>sp|Q9NQC3|RTN4_HUMAN Reticulon-4 OS=Homo sapiens GN=RTN4 PE=1 SV=2	15034	YJC_160818_PC9mem_AALmnp_G_01.11151.11151.3	controllerType=0 controllerNumber=1 scan=11151	71.5069
15879:3	18	K.YQFVREPEDEEEEEEEEEEDEDEDLEELEVLER.K			1396.58	3	4187.73	4186.73	1	-0.6	25	Specific	746.37	465.32	191.19	10.92	9	>sp|Q9NQC3|RTN4_HUMAN Reticulon-4 OS=Homo sapiens GN=RTN4 PE=1 SV=2	15034	YJC_160818_PC9mem_AALmnp_G_01.13942.13942.3	controllerType=0 controllerNumber=1 scan=13942	88.8312
14198:3	18	K.YQFVREPEDEEEEEEEEEEDEDEDLEELEVLER.K			1396.25	3	4186.73	4186.73	0	0.8	25	Specific	753.8	584.45	350.8	12.5	9	>sp|Q9NQC3|RTN4_HUMAN Reticulon-4 OS=Homo sapiens GN=RTN4 PE=1 SV=2	15034	YJC_160818_PC9mem_AALmnp_G_01.12295.12295.3	controllerType=0 controllerNumber=1 scan=12295	78.5216
10457:3	18	K.YQFVREPEDEEEEEEEEEEDEDEDLEELEVLER.K			1395.91	3	4185.71	4186.73	-1	-2.4	25	Specific	767.07	466.39	466.39	11.82	9	>sp|Q9NQC3|RTN4_HUMAN Reticulon-4 OS=Homo sapiens GN=RTN4 PE=1 SV=2	15034	YJC_160818_PC9mem_AALmnp_G_01.9076.9076.3	controllerType=0 controllerNumber=1 scan=9076	59.3719
22598:3	18	K.YQFVREPEDEEEEEEEEEEDEDEDLEELEVLER.K			1396.25	3	4186.73	4186.73	0	0.9	25	Specific	768.92	426.08	204.13	12.03	9	>sp|Q9NQC3|RTN4_HUMAN Reticulon-4 OS=Homo sapiens GN=RTN4 PE=1 SV=2	15034	YJC_160818_PC9mem_AALmnp_G_01.19972.19972.3	controllerType=0 controllerNumber=1 scan=19972	129.074
18153:3	18	K.YQFVREPEDEEEEEEEEEEDEDEDLEELEVLER.K			1395.91	3	4185.72	4186.73	-1	-0.1	25	Specific	772.7	441.11	441.11	11.84	9	>sp|Q9NQC3|RTN4_HUMAN Reticulon-4 OS=Homo sapiens GN=RTN4 PE=1 SV=2	15034	YJC_160818_PC9mem_AALmnp_G_01.16043.16043.3	controllerType=0 controllerNumber=1 scan=16043	102.396
11056:3	18	K.YQFVREPEDEEEEEEEEEEDEDEDLEELEVLER.K			1396.24	3	4186.71	4186.73	0	-3.1	25	Specific	799.84	477.79	215.81	12.19	9	>sp|Q9NQC3|RTN4_HUMAN Reticulon-4 OS=Homo sapiens GN=RTN4 PE=1 SV=2	15034	YJC_160818_PC9mem_AALmnp_G_01.9600.9600.3	controllerType=0 controllerNumber=1 scan=9600	62.4472
13462:3	18	K.YQFVREPEDEEEEEEEEEEDEDEDLEELEVLER.K			1396.24	3	4186.7	4186.73	0	-5.5	25	Specific	808.43	614.13	370.76	13.23	9	>sp|Q9NQC3|RTN4_HUMAN Reticulon-4 OS=Homo sapiens GN=RTN4 PE=1 SV=2	15034	YJC_160818_PC9mem_AALmnp_G_01.11633.11633.3	controllerType=0 controllerNumber=1 scan=11633	74.5175
17659:3	18	K.YQFVREPEDEEEEEEEEEEDEDEDLEELEVLER.K			1396.24	3	4186.72	4186.73	0	-1.6	25	Specific	816.26	526.82	207.39	12.97	9	>sp|Q9NQC3|RTN4_HUMAN Reticulon-4 OS=Homo sapiens GN=RTN4 PE=1 SV=2	15034	YJC_160818_PC9mem_AALmnp_G_01.15585.15585.3	controllerType=0 controllerNumber=1 scan=15585	99.3789
12914:3	18	K.YQFVREPEDEEEEEEEEEEDEDEDLEELEVLER.K			1396.24	3	4186.71	4186.73	0	-3.4	25	Specific	820.38	557.55	244.98	13.28	9	>sp|Q9NQC3|RTN4_HUMAN Reticulon-4 OS=Homo sapiens GN=RTN4 PE=1 SV=2	15034	YJC_160818_PC9mem_AALmnp_G_01.11150.11150.3	controllerType=0 controllerNumber=1 scan=11150	71.5042
12330:3	18	K.YQFVREPEDEEEEEEEEEEDEDEDLEELEVLER.K			1396.24	3	4186.71	4186.73	0	-3.7	25	Specific	825.23	560.18	179.01	13.66	9	>sp|Q9NQC3|RTN4_HUMAN Reticulon-4 OS=Homo sapiens GN=RTN4 PE=1 SV=2	15034	YJC_160818_PC9mem_AALmnp_G_01.10655.10655.3	controllerType=0 controllerNumber=1 scan=10655	68.4667
11729:3	18	K.YQFVREPEDEEEEEEEEEEDEDEDLEELEVLER.K			1396.25	3	4186.72	4186.73	0	-0.9	25	Specific	838.32	594.8	230.11	13.58	9	>sp|Q9NQC3|RTN4_HUMAN Reticulon-4 OS=Homo sapiens GN=RTN4 PE=1 SV=2	15034	YJC_160818_PC9mem_AALmnp_G_01.10154.10154.3	controllerType=0 controllerNumber=1 scan=10154	65.4515
23013:3	18	K.YQFVREPEDEEEEEEEEEEDEDEDLEELEVLER.K			1396.25	3	4186.73	4186.73	0	1.3	25	Specific	852.4	583.4	245.44	14.33	9	>sp|Q9NQC3|RTN4_HUMAN Reticulon-4 OS=Homo sapiens GN=RTN4 PE=1 SV=2	15034	YJC_160818_PC9mem_AALmnp_G_01.21250.21250.3	controllerType=0 controllerNumber=1 scan=21250	144.503
14770:3	18	K.YQFVREPEDEEEEEEEEEEDEDEDLEELEVLER.K			1396.25	3	4186.74	4186.73	0	3.7	25	Specific	856.13	574.41	205.8	13.73	9	>sp|Q9NQC3|RTN4_HUMAN Reticulon-4 OS=Homo sapiens GN=RTN4 PE=1 SV=2	15034	YJC_160818_PC9mem_AALmnp_G_01.12894.12894.3	controllerType=0 controllerNumber=1 scan=12894	82.2542
13461:3	18	K.YQFVREPEDEEEEEEEEEEDEDEDLEELEVLER.K			1396.24	3	4186.7	4186.73	0	-5.5	25	Specific	857.48	603.83	222.84	14.23	9	>sp|Q9NQC3|RTN4_HUMAN Reticulon-4 OS=Homo sapiens GN=RTN4 PE=1 SV=2	15034	YJC_160818_PC9mem_AALmnp_G_01.11632.11632.3	controllerType=0 controllerNumber=1 scan=11632	74.5138
19239:3	18	K.YQFVREPEDEEEEEEEEEEDEDEDLEELEVLER.K			1396.24	3	4186.71	4186.73	0	-4.9	25	Specific	859.46	489.74	179.06	14.12	9	>sp|Q9NQC3|RTN4_HUMAN Reticulon-4 OS=Homo sapiens GN=RTN4 PE=1 SV=2	15034	YJC_160818_PC9mem_AALmnp_G_01.16999.16999.3	controllerType=0 controllerNumber=1 scan=16999	108.791
22702:3	18	K.YQFVREPEDEEEEEEEEEEDEDEDLEELEVLER.K			1396.25	3	4186.74	4186.73	0	4.2	25	Specific	924.28	924.28	455.05	15.29	9	>sp|Q9NQC3|RTN4_HUMAN Reticulon-4 OS=Homo sapiens GN=RTN4 PE=1 SV=2	15034	YJC_160818_PC9mem_AALmnp_G_01.20882.20882.3	controllerType=0 controllerNumber=1 scan=20882	141.287
23050:4	18	K.YQFVREPEDEEEEEEEEEEDEDEDLEELEVLER.K			1047.44	4	4186.73	4186.73	0	0.3	25	Specific	928.84	804.73	537.37	14.96	9	>sp|Q9NQC3|RTN4_HUMAN Reticulon-4 OS=Homo sapiens GN=RTN4 PE=1 SV=2	15034	YJC_160818_PC9mem_AALmnp_G_01.21340.21340.4	controllerType=0 controllerNumber=1 scan=21340	145.23
14196:3	18	K.YQFVREPEDEEEEEEEEEEDEDEDLEELEVLER.K			1396.25	3	4186.73	4186.73	0	0.8	25	Specific	971.79	630.3	218.72	16.5	9	>sp|Q9NQC3|RTN4_HUMAN Reticulon-4 OS=Homo sapiens GN=RTN4 PE=1 SV=2	15034	YJC_160818_PC9mem_AALmnp_G_01.12294.12294.3	controllerType=0 controllerNumber=1 scan=12294	78.5186
19771:3	18	K.YQ[+0.984]FVREPEDEEEEEEEEEEDEDEDLEELEVLER.K		Q[+1]	1396.57	3	4187.68	4187.71	0	-6.6	25	Specific	217.57	132.04	132.04	2.79	9	>sp|Q9NQC3|RTN4_HUMAN Reticulon-4 OS=Homo sapiens GN=RTN4 PE=1 SV=2	15034	YJC_160818_PC9mem_AALmnp_G_01.17486.17486.4	controllerType=0 controllerNumber=1 scan=17486	112.133
19769:3	18	K.YQ[+0.984]FVREPEDEEEEEEEEEEDEDEDLEELEVLER.K		Q[+1]	1396.57	3	4187.68	4187.71	0	-6.6	25	Specific	448.57	204.98	204.98	3.3	9	>sp|Q9NQC3|RTN4_HUMAN Reticulon-4 OS=Homo sapiens GN=RTN4 PE=1 SV=2	15034	YJC_160818_PC9mem_AALmnp_G_01.17485.17485.4	controllerType=0 controllerNumber=1 scan=17485	112.126
10415:3	18	K.YQFVREPEDEEEEEEEEEEDEDEDLEELEVLERK.P			1438.94	3	4314.81	4314.82	0	-2.8	25	Specific	490.49	135.68	135.68	3.31	9	>sp|Q9NQC3|RTN4_HUMAN Reticulon-4 OS=Homo sapiens GN=RTN4 PE=1 SV=2	15034	YJC_160818_PC9mem_AALmnp_G_01.9042.9042.3	controllerType=0 controllerNumber=1 scan=9042	59.1765
13164:5	18	K.YQFVREPEDEEEEEEEEEEDEDEDLEELEVLERKPAAGLSAAPVPTAPAAGAPLMDFGNDFVPPAPR.G			1488.68	5	7439.4	7439.4	0	-0.8	25	Specific	333.51	333.51	198.67	5.53	9	>sp|Q9NQC3|RTN4_HUMAN Reticulon-4 OS=Homo sapiens GN=RTN4 PE=1 SV=2	15034	YJC_160818_PC9mem_AALmnp_G_01.11387.11387.5	controllerType=0 controllerNumber=1 scan=11387	73.0326
13474:4	18	K.YQFVREPEDEEEEEEEEEEDEDEDLEELEVLERKPAAGLSAAPVPTAPAAGAPLMDFGNDFVPPAPR.G			1860.6	4	7439.38	7439.4	0	-3	25	Specific	396.14	337.58	117.43	5.48	9	>sp|Q9NQC3|RTN4_HUMAN Reticulon-4 OS=Homo sapiens GN=RTN4 PE=1 SV=2	15034	YJC_160818_PC9mem_AALmnp_G_01.11643.11643.2	controllerType=0 controllerNumber=1 scan=11643	74.5704
13520:9	18	K.YQFVREPEDEEEEEEEEEEDEDEDLEELEVLERKPAAGLSAAPVPTAPAAGAPLMDFGNDFVPPAPR.G			827.494	9	7439.38	7439.4	0	-2.4	25	Specific	412.8	412.8	84.46	6.2	9	>sp|Q9NQC3|RTN4_HUMAN Reticulon-4 OS=Homo sapiens GN=RTN4 PE=1 SV=2	15034	YJC_160818_PC9mem_AALmnp_G_01.11687.11687.9	controllerType=0 controllerNumber=1 scan=11687	74.8314
13519:9	18	K.YQFVREPEDEEEEEEEEEEDEDEDLEELEVLERKPAAGLSAAPVPTAPAAGAPLMDFGNDFVPPAPR.G			827.494	9	7439.38	7439.4	0	-2.4	25	Specific	440.91	62.07	62.07	1.79	9	>sp|Q9NQC3|RTN4_HUMAN Reticulon-4 OS=Homo sapiens GN=RTN4 PE=1 SV=2	15034	YJC_160818_PC9mem_AALmnp_G_01.11686.11686.9	controllerType=0 controllerNumber=1 scan=11686	74.8256
13473:4	18	K.YQFVREPEDEEEEEEEEEEDEDEDLEELEVLERKPAAGLSAAPVPTAPAAGAPLMDFGNDFVPPAPR.G			1860.6	4	7439.38	7439.4	0	-3	25	Specific	889.54	439.52	95.7	14.61	9	>sp|Q9NQC3|RTN4_HUMAN Reticulon-4 OS=Homo sapiens GN=RTN4 PE=1 SV=2	15034	YJC_160818_PC9mem_AALmnp_G_01.11642.11642.2	controllerType=0 controllerNumber=1 scan=11642	74.5647
12736:6	18	K.YQFVREPEDEEEEEEEEEEDEDEDLEELEVLERKPAAGLSAAPVPTAPAAGAPLM[+15.995]DFGNDFVPPAPR.G		M[+16]	1243.23	6	7454.37	7455.4	-1	-3.7	25	Specific	268.35	268.35	268.35	3.71	9	>sp|Q9NQC3|RTN4_HUMAN Reticulon-4 OS=Homo sapiens GN=RTN4 PE=1 SV=2	15034	YJC_160818_PC9mem_AALmnp_G_01.11013.11013.3	controllerType=0 controllerNumber=1 scan=11013	70.7073
13329:6	18	K.YQFVREPEDEEEEEEEEEEDEDEDLEELEVLERKPAAGLSAAPVPTAPAAGAPLMDFGN[+0.984]DFVPPAPR.G		N[+1]	1240.9	6	7440.37	7440.39	0	-2.1	25	Specific	428.25	4.12	4.12	0.94	9	>sp|Q9NQC3|RTN4_HUMAN Reticulon-4 OS=Homo sapiens GN=RTN4 PE=1 SV=2	15034	YJC_160818_PC9mem_AALmnp_G_01.11528.11528.6	controllerType=0 controllerNumber=1 scan=11528	73.8952
12902:8	18	K.YQFVREPEDEEEEEEEEEEDEDEDLEELEVLERKPAAGLSAAPVPTAPAAGAPLM[+15.995]DFGNDFVPPAPR.G		M[+16]	932.681	8	7454.4	7455.4	-1	0.8	25	Specific	501.65	449.36	449.36	5.9	9	>sp|Q9NQC3|RTN4_HUMAN Reticulon-4 OS=Homo sapiens GN=RTN4 PE=1 SV=2	15034	YJC_160818_PC9mem_AALmnp_G_01.11141.11141.8	controllerType=0 controllerNumber=1 scan=11141	71.4499
13330:6	18	K.YQFVREPEDEEEEEEEEEEDEDEDLEELEVLERKPAAGLSAAPVPTAPAAGAPLMDFGN[+0.984]DFVPPAPR.G		N[+1]	1240.9	6	7440.37	7440.39	0	-2.1	25	Specific	510.06	510.06	163.03	6.85	9	>sp|Q9NQC3|RTN4_HUMAN Reticulon-4 OS=Homo sapiens GN=RTN4 PE=1 SV=2	15034	YJC_160818_PC9mem_AALmnp_G_01.11529.11529.6	controllerType=0 controllerNumber=1 scan=11529	73.9009
12923:4	18	K.YQFVREPEDEEEEEEEEEEDEDEDLEELEVLERKPAAGLSAAPVPTAPAAGAPLM[+15.995]DFGNDFVPPAPR.G		M[+16]	1864.34	4	7454.34	7455.4	-1	-7.3	25	Specific	629.21	194.36	194.36	5.72	9	>sp|Q9NQC3|RTN4_HUMAN Reticulon-4 OS=Homo sapiens GN=RTN4 PE=1 SV=2	15034	YJC_160818_PC9mem_AALmnp_G_01.11159.11159.2	controllerType=0 controllerNumber=1 scan=11159	71.5642
12718:5	18	K.YQFVREPEDEEEEEEEEEEDEDEDLEELEVLERKPAAGLSAAPVPTAPAAGAPLM[+15.995]DFGN[+0.984]DFVPPAPR.G		M[+16], N[+1]	1492.28	5	7457.37	7456.38	1	-1.6	25	Specific	599.89	599.89	267.8	8.75	9	>sp|Q9NQC3|RTN4_HUMAN Reticulon-4 OS=Homo sapiens GN=RTN4 PE=1 SV=2	15034	YJC_160818_PC9mem_AALmnp_G_01.11002.11002.5	controllerType=0 controllerNumber=1 scan=11002	70.6542
13724:4	18	R.EPEDEEEEEEEEEEDEDEDLEELEVLERKPAAGLSAAPVPTAPAAGAPLMDFGNDFVPPAPR.G			1687.26	4	6746.01	6746.04	0	-4.6	30	Specific	399.86	399.86	250.52	6.66	9	>sp|Q9NQC3|RTN4_HUMAN Reticulon-4 OS=Homo sapiens GN=RTN4 PE=1 SV=2	15034	YJC_160818_PC9mem_AALmnp_G_01.11875.11875.4	controllerType=0 controllerNumber=1 scan=11875	76.0321
13716:5	18	R.EPEDEEEEEEEEEEDEDEDLEELEVLERKPAAGLSAAPVPTAPAAGAPLMDFGNDFVPPAPR.G			1349.81	5	6745.02	6746.04	-1	-2.9	30	Specific	608.3	118.54	118.54	5.33	9	>sp|Q9NQC3|RTN4_HUMAN Reticulon-4 OS=Homo sapiens GN=RTN4 PE=1 SV=2	15034	YJC_160818_PC9mem_AALmnp_G_01.11867.11867.5	controllerType=0 controllerNumber=1 scan=11867	75.994
13723:4	18	R.EPEDEEEEEEEEEEDEDEDLEELEVLERKPAAGLSAAPVPTAPAAGAPLMDFGNDFVPPAPR.G			1687.26	4	6746.01	6746.04	0	-4.6	30	Specific	686.85	279.8	147.62	8.52	9	>sp|Q9NQC3|RTN4_HUMAN Reticulon-4 OS=Homo sapiens GN=RTN4 PE=1 SV=2	15034	YJC_160818_PC9mem_AALmnp_G_01.11874.11874.4	controllerType=0 controllerNumber=1 scan=11874	76.0299
13718:5	18	R.EPEDEEEEEEEEEEDEDEDLEELEVLERKPAAGLSAAPVPTAPAAGAPLMDFGNDFVPPAPR.G			1349.81	5	6745.02	6746.04	-1	-2.9	30	Specific	712.16	675.16	675.16	11.12	9	>sp|Q9NQC3|RTN4_HUMAN Reticulon-4 OS=Homo sapiens GN=RTN4 PE=1 SV=2	15034	YJC_160818_PC9mem_AALmnp_G_01.11868.11868.5	controllerType=0 controllerNumber=1 scan=11868	76.0001
13003:4	18	R.AYLESEVAISEELVQKYSNSALGHVNC[+57.021]TIK.E		C[+57]	838.921	4	3352.66	3352.67	0	-3.4	1075	Specific	182.67	8.26	8.26	0.06	9	>sp|Q9NQC3|RTN4_HUMAN Reticulon-4 OS=Homo sapiens GN=RTN4 PE=1 SV=2	15034	YJC_160818_PC9mem_AALmnp_G_01.11226.11226.4	controllerType=0 controllerNumber=1 scan=11226	71.9917
13005:4	18	R.AYLESEVAISEELVQKYSNSALGHVNC[+57.021]TIK.E		C[+57]	838.921	4	3352.66	3352.67	0	-3.4	1075	Specific	1196.45	1075.14	1075.14	20.81	9	>sp|Q9NQC3|RTN4_HUMAN Reticulon-4 OS=Homo sapiens GN=RTN4 PE=1 SV=2	15034	YJC_160818_PC9mem_AALmnp_G_01.11227.11227.4	controllerType=0 controllerNumber=1 scan=11227	71.9981
05512:5	19	R.ETKDLDEMDDDDDDDDVGDHDDDHPGMEVVLHEDKK.Y			831.534	5	4153.64	4153.65	0	-2	29	Specific	457.05	222.82	222.82	4.07	6	>sp|Q15029|U5S1_HUMAN 116 kDa U5 small nuclear ribonucleoprotein component OS=Homo sapiens GN=EFTUD2 PE=1 SV=1	18459	YJC_160818_PC9mem_AALmnp_G_01.5190.5190.5	controllerType=0 controllerNumber=1 scan=5190	36.1268
05514:5	19	R.ETKDLDEMDDDDDDDDVGDHDDDHPGMEVVLHEDKK.Y			831.534	5	4153.64	4153.65	0	-2	29	Specific	1136.24	1078.94	1078.94	19.15	6	>sp|Q15029|U5S1_HUMAN 116 kDa U5 small nuclear ribonucleoprotein component OS=Homo sapiens GN=EFTUD2 PE=1 SV=1	18459	YJC_160818_PC9mem_AALmnp_G_01.5191.5191.5	controllerType=0 controllerNumber=1 scan=5191	36.1324
05245:5	19	K.DLDEM[+15.995]DDDDDDDDVGDHDDDHPGMEVVLHEDKK.Y		M[+16]	763.096	5	3811.45	3811.46	0	-2.3	32	Specific	314.69	155.28	155.28	3.16	6	>sp|Q15029|U5S1_HUMAN 116 kDa U5 small nuclear ribonucleoprotein component OS=Homo sapiens GN=EFTUD2 PE=1 SV=1	18459	YJC_160818_PC9mem_AALmnp_G_01.4989.4989.5	controllerType=0 controllerNumber=1 scan=4989	34.9181
05246:5	19	K.DLDEM[+15.995]DDDDDDDDVGDHDDDHPGMEVVLHEDKK.Y		M[+16]	763.096	5	3811.45	3811.46	0	-2.3	32	Specific	432.9	414.04	414.04	6.52	6	>sp|Q15029|U5S1_HUMAN 116 kDa U5 small nuclear ribonucleoprotein component OS=Homo sapiens GN=EFTUD2 PE=1 SV=1	18459	YJC_160818_PC9mem_AALmnp_G_01.4990.4990.5	controllerType=0 controllerNumber=1 scan=4990	34.9267
09207:3	19	R.KRYDQDLC[+57.021]YTDILFTEQER.G		C[+57]	831.726	3	2493.16	2493.17	0	-2.9	159	Specific	460.21	299.39	299.39	5.3	6	>sp|Q15029|U5S1_HUMAN 116 kDa U5 small nuclear ribonucleoprotein component OS=Homo sapiens GN=EFTUD2 PE=1 SV=1	18459	YJC_160818_PC9mem_AALmnp_G_01.8053.8053.3	controllerType=0 controllerNumber=1 scan=8053	53.1948
09209:3	19	R.KRYDQDLC[+57.021]YTDILFTEQER.G		C[+57]	831.726	3	2493.16	2493.17	0	-2.9	159	Specific	702.75	632.48	632.48	11.73	6	>sp|Q15029|U5S1_HUMAN 116 kDa U5 small nuclear ribonucleoprotein component OS=Homo sapiens GN=EFTUD2 PE=1 SV=1	18459	YJC_160818_PC9mem_AALmnp_G_01.8054.8054.3	controllerType=0 controllerNumber=1 scan=8054	53.1981
16918:3	19	R.ISDGVVLFIDAAEGVMLNTER.L			750.387	3	2249.15	2249.15	0	-0.3	221	Specific	485.75	329.43	329.43	5.17	6	>sp|Q15029|U5S1_HUMAN 116 kDa U5 small nuclear ribonucleoprotein component OS=Homo sapiens GN=EFTUD2 PE=1 SV=1	18459	YJC_160818_PC9mem_AALmnp_G_01.14918.14918.3	controllerType=0 controllerNumber=1 scan=14918	95.0425
16920:3	19	R.ISDGVVLFIDAAEGVMLNTER.L			750.387	3	2249.15	2249.15	0	-0.3	221	Specific	641.1	586.63	586.63	9.24	6	>sp|Q15029|U5S1_HUMAN 116 kDa U5 small nuclear ribonucleoprotein component OS=Homo sapiens GN=EFTUD2 PE=1 SV=1	18459	YJC_160818_PC9mem_AALmnp_G_01.14919.14919.3	controllerType=0 controllerNumber=1 scan=14919	95.0458
11556:6	19	R.THTQGQAFSLSVFHHWQIVPGDPLDKSIVIRPLEPQPAPHLAR.E			804.263	6	4820.54	4820.55	0	-2.9	889	Specific	1338.5	1338.5	181.68	23.18	6	>sp|Q15029|U5S1_HUMAN 116 kDa U5 small nuclear ribonucleoprotein component OS=Homo sapiens GN=EFTUD2 PE=1 SV=1	18459	YJC_160818_PC9mem_AALmnp_G_01.9970.9970.6	controllerType=0 controllerNumber=1 scan=9970	64.2729
11555:6	19	R.THTQGQAFSLSVFHHWQIVPGDPLDKSIVIRPLEPQ[+0.984]PAPHLAR.E		Q[+1]	804.263	6	4820.54	4821.54	-1	1.1	889	Specific	510.04	274.65	34.03	3.99	6	>sp|Q15029|U5S1_HUMAN 116 kDa U5 small nuclear ribonucleoprotein component OS=Homo sapiens GN=EFTUD2 PE=1 SV=1	18459	YJC_160818_PC9mem_AALmnp_G_01.9969.9969.6	controllerType=0 controllerNumber=1 scan=9969	64.2668
21829:5	20	R.YIPDAMNLILLLVTEKLEDVALQILLAC[+57.021]PVSKEDGPSVFGSFFLQHC[+57.021]VTMNTPVEK.L		C[+57]*2	1261.46	5	6303.26	6303.25	0	1	334	Specific	903.19	903.19	27.02	15.36	7	>sp|P42704|LPPRC_HUMAN Leucine-rich PPR motif-containing protein, mitochondrial OS=Homo sapiens GN=LRPPRC PE=1 SV=3	9559	YJC_160818_PC9mem_AALmnp_G_01.19289.19289.5	controllerType=0 controllerNumber=1 scan=19289	124.559
15683:3	20	R.SMNINLWSEITELLYKDGR.Y			761.387	3	2282.15	2282.15	0	-1.4	551	Specific	388.43	148.85	148.85	3.84	7	>sp|P42704|LPPRC_HUMAN Leucine-rich PPR motif-containing protein, mitochondrial OS=Homo sapiens GN=LRPPRC PE=1 SV=3	9559	YJC_160818_PC9mem_AALmnp_G_01.13755.13755.3	controllerType=0 controllerNumber=1 scan=13755	87.5987
15685:3	20	R.SMNINLWSEITELLYKDGR.Y			761.387	3	2282.15	2282.15	0	-1.4	551	Specific	707.91	685.99	685.99	11.87	7	>sp|P42704|LPPRC_HUMAN Leucine-rich PPR motif-containing protein, mitochondrial OS=Homo sapiens GN=LRPPRC PE=1 SV=3	9559	YJC_160818_PC9mem_AALmnp_G_01.13756.13756.3	controllerType=0 controllerNumber=1 scan=13756	87.6048
16259:4	20	R.GPTEAVGYFLYNLIDSMSDSEVQAKEEHLR.Q			850.409	4	3398.61	3398.62	0	-1.8	576	Specific	607.05	480.32	480.32	9.78	7	>sp|P42704|LPPRC_HUMAN Leucine-rich PPR motif-containing protein, mitochondrial OS=Homo sapiens GN=LRPPRC PE=1 SV=3	9559	YJC_160818_PC9mem_AALmnp_G_01.14304.14304.4	controllerType=0 controllerNumber=1 scan=14304	91.0617
16261:4	20	R.GPTEAVGYFLYNLIDSMSDSEVQAKEEHLR.Q			850.409	4	3398.61	3398.62	0	-1.8	576	Specific	1108.21	1047.9	1047.9	19.78	7	>sp|P42704|LPPRC_HUMAN Leucine-rich PPR motif-containing protein, mitochondrial OS=Homo sapiens GN=LRPPRC PE=1 SV=3	9559	YJC_160818_PC9mem_AALmnp_G_01.14305.14305.4	controllerType=0 controllerNumber=1 scan=14305	91.0677
10459:3	20	K.AKYESDMVTGGYAALINLC[+57.021]C[+57.021]R.H		C[+57]*2	798.044	3	2392.12	2392.11	0	3.6	703	Specific	339.87	161.78	161.78	3.56	7	>sp|P42704|LPPRC_HUMAN Leucine-rich PPR motif-containing protein, mitochondrial OS=Homo sapiens GN=LRPPRC PE=1 SV=3	9559	YJC_160818_PC9mem_AALmnp_G_01.9079.9079.3	controllerType=0 controllerNumber=1 scan=9079	59.3938
10461:3	20	K.AKYESDMVTGGYAALINLC[+57.021]C[+57.021]R.H		C[+57]*2	798.044	3	2392.12	2392.11	0	3.6	703	Specific	636.04	479.92	479.92	9.59	7	>sp|P42704|LPPRC_HUMAN Leucine-rich PPR motif-containing protein, mitochondrial OS=Homo sapiens GN=LRPPRC PE=1 SV=3	9559	YJC_160818_PC9mem_AALmnp_G_01.9080.9080.3	controllerType=0 controllerNumber=1 scan=9080	59.4003
20946:3	20	K.AMDFVSQEQGEMVMLYDLFFAFLQTGNYK.E			1141.53	3	3422.59	3422.58	0	3.3	877	Specific	424.42	170.93	170.93	2.72	7	>sp|P42704|LPPRC_HUMAN Leucine-rich PPR motif-containing protein, mitochondrial OS=Homo sapiens GN=LRPPRC PE=1 SV=3	9559	YJC_160818_PC9mem_AALmnp_G_01.18522.18522.2	controllerType=0 controllerNumber=1 scan=18522	119.263
19292:3	20	K.AM[+15.995]DFVSQEQGEMVMLYDLFFAFLQTGNYKEAK.K		M[+16]	1256.26	3	3766.76	3766.75	0	2.9	877	Specific	204.3	163.85	82.49	3.44	7	>sp|P42704|LPPRC_HUMAN Leucine-rich PPR motif-containing protein, mitochondrial OS=Homo sapiens GN=LRPPRC PE=1 SV=3	9559	YJC_160818_PC9mem_AALmnp_G_01.17039.17039.3	controllerType=0 controllerNumber=1 scan=17039	109.06
19290:3	20	K.AM[+15.995]DFVSQEQGEMVMLYDLFFAFLQTGNYKEAK.K		M[+16]	1256.26	3	3766.76	3766.75	0	2.9	877	Specific	468.8	202.3	186.3	3.54	7	>sp|P42704|LPPRC_HUMAN Leucine-rich PPR motif-containing protein, mitochondrial OS=Homo sapiens GN=LRPPRC PE=1 SV=3	9559	YJC_160818_PC9mem_AALmnp_G_01.17038.17038.3	controllerType=0 controllerNumber=1 scan=17038	109.055
13347:3	20	K.GAYDIFLNAKEQNIVFNAETYSNLIK.L			992.508	3	2975.51	2975.51	0	-2.1	1050	Specific	464.66	223.06	223.06	4.33	7	>sp|P42704|LPPRC_HUMAN Leucine-rich PPR motif-containing protein, mitochondrial OS=Homo sapiens GN=LRPPRC PE=1 SV=3	9559	YJC_160818_PC9mem_AALmnp_G_01.11545.11545.3	controllerType=0 controllerNumber=1 scan=11545	74.0085
13349:3	20	K.GAYDIFLNAKEQNIVFNAETYSNLIK.L			992.508	3	2975.51	2975.51	0	-2.1	1050	Specific	600.35	509.81	509.81	10	7	>sp|P42704|LPPRC_HUMAN Leucine-rich PPR motif-containing protein, mitochondrial OS=Homo sapiens GN=LRPPRC PE=1 SV=3	9559	YJC_160818_PC9mem_AALmnp_G_01.11546.11546.3	controllerType=0 controllerNumber=1 scan=11546	74.0149
21942:5	21	M.PEETQTQDQPMEEEEVETFAFQAEIAQLMSLIINTFYSNKEIFLR.E			1068.32	5	5337.55	5337.55	0	0	2	NRagged	713.34	336.67	102.47	8.95	4	>sp|P07900|HS90A_HUMAN Heat shock protein HSP 90-alpha OS=Homo sapiens GN=HSP90AA1 PE=1 SV=5	7697	YJC_160818_PC9mem_AALmnp_G_01.19375.19375.5	controllerType=0 controllerNumber=1 scan=19375	125.083
21944:5	21	M.PEETQTQDQPMEEEEVETFAFQAEIAQLMSLIINTFYSNKEIFLR.E			1068.32	5	5337.55	5337.55	0	0	2	NRagged	873.89	873.89	122.58	13.71	4	>sp|P07900|HS90A_HUMAN Heat shock protein HSP 90-alpha OS=Homo sapiens GN=HSP90AA1 PE=1 SV=5	7697	YJC_160818_PC9mem_AALmnp_G_01.19376.19376.5	controllerType=0 controllerNumber=1 scan=19376	125.086
21921:4	21	M.PEETQTQDQPMEEEEVETFAFQAEIAQLMSLIINTFYSNKEIFLR.E			1335.14	4	5337.55	5337.55	0	0.8	2	NRagged	944.46	615.55	113.94	14.97	4	>sp|P07900|HS90A_HUMAN Heat shock protein HSP 90-alpha OS=Homo sapiens GN=HSP90AA1 PE=1 SV=5	7697	YJC_160818_PC9mem_AALmnp_G_01.19360.19360.4	controllerType=0 controllerNumber=1 scan=19360	125.022
21922:4	21	M.PEETQTQDQPMEEEEVETFAFQAEIAQLMSLIINTFYSNKEIFLR.E			1335.14	4	5337.55	5337.55	0	0.8	2	NRagged	989.67	986.29	132.48	15.97	4	>sp|P07900|HS90A_HUMAN Heat shock protein HSP 90-alpha OS=Homo sapiens GN=HSP90AA1 PE=1 SV=5	7697	YJC_160818_PC9mem_AALmnp_G_01.19361.19361.4	controllerType=0 controllerNumber=1 scan=19361	125.028
12723:3	21	R.TLTIVDTGIGMTKADLINNLGTIAK.S			858.473	3	2573.4	2573.42	0	-6.8	88	Specific	814.84	588.06	588.06	13.4	4	>sp|P07900|HS90A_HUMAN Heat shock protein HSP 90-alpha OS=Homo sapiens GN=HSP90AA1 PE=1 SV=5	7697	YJC_160818_PC9mem_AALmnp_G_01.11005.11005.3	controllerType=0 controllerNumber=1 scan=11005	70.666
12725:3	21	R.TLTIVDTGIGMTKADLINNLGTIAK.S			858.473	3	2573.4	2573.42	0	-6.8	88	Specific	862.61	760.03	760.03	14.4	4	>sp|P07900|HS90A_HUMAN Heat shock protein HSP 90-alpha OS=Homo sapiens GN=HSP90AA1 PE=1 SV=5	7697	YJC_160818_PC9mem_AALmnp_G_01.11006.11006.3	controllerType=0 controllerNumber=1 scan=11006	70.6686
17619:3	21	K.SVKDLVILLYETALLSSGFSLEDPQTHANR.I			1106.25	3	3316.74	3316.74	0	-0.5	658	Specific	635.68	635.68	635.68	9.47	4	>sp|P07900|HS90A_HUMAN Heat shock protein HSP 90-alpha OS=Homo sapiens GN=HSP90AA1 PE=1 SV=5	7697	YJC_160818_PC9mem_AALmnp_G_01.15555.15555.3	controllerType=0 controllerNumber=1 scan=15555	99.1896
17617:3	21	K.SVKDLVILLYETALLSSGFSLEDPQTHANR.I			1106.25	3	3316.74	3316.74	0	-0.5	658	Specific	939.32	629.47	629.47	15.47	4	>sp|P07900|HS90A_HUMAN Heat shock protein HSP 90-alpha OS=Homo sapiens GN=HSP90AA1 PE=1 SV=5	7697	YJC_160818_PC9mem_AALmnp_G_01.15554.15554.3	controllerType=0 controllerNumber=1 scan=15554	99.1821
17301:4	21	K.DLVILLYETALLSSGFSLEDPQTHANR.I			751.392	4	3002.55	3002.55	0	0.2	661	Specific	596.98	465.8	465.8	8.06	4	>sp|P07900|HS90A_HUMAN Heat shock protein HSP 90-alpha OS=Homo sapiens GN=HSP90AA1 PE=1 SV=5	7697	YJC_160818_PC9mem_AALmnp_G_01.15269.15269.4	controllerType=0 controllerNumber=1 scan=15269	97.3503
17303:4	21	K.DLVILLYETALLSSGFSLEDPQTHANR.I			751.392	4	3002.55	3002.55	0	0.2	661	Specific	1141.96	1082.87	1082.87	19.06	4	>sp|P07900|HS90A_HUMAN Heat shock protein HSP 90-alpha OS=Homo sapiens GN=HSP90AA1 PE=1 SV=5	7697	YJC_160818_PC9mem_AALmnp_G_01.15270.15270.4	controllerType=0 controllerNumber=1 scan=15270	97.3533
12011:5	22	-.MFLYN[+0.984]LTLQRATGISFAIHGNFSGTKQQEIVVSR.G		N[+1]	766.407	5	3828.01	3827.99	0	4.1	1	NRagged	603.74	603.74	43.08	9.27	4	>sp|Q15393|SF3B3_HUMAN Splicing factor 3B subunit 3 OS=Homo sapiens GN=SF3B3 PE=1 SV=4	15682	YJC_160818_PC9mem_AALmnp_G_01.10376.10376.5	controllerType=0 controllerNumber=1 scan=10376	66.7773
16077:5	22	K.TGFLFVASEFGNHYLYQIAHLGDDDEEPEFSSAMPLEEGDTFFFQPRPLK.N			1148.54	5	5738.69	5738.67	0	2.8	344	Specific	812.31	393.84	65.52	12.97	4	>sp|Q15393|SF3B3_HUMAN Splicing factor 3B subunit 3 OS=Homo sapiens GN=SF3B3 PE=1 SV=4	15682	YJC_160818_PC9mem_AALmnp_G_01.14146.14146.5	controllerType=0 controllerNumber=1 scan=14146	90.144
16078:5	22	K.TGFLFVASEFGNHYLYQIAHLGDDDEEPEFSSAMPLEEGDTFFFQPRPLK.N			1148.54	5	5738.69	5738.67	0	2.8	344	Specific	1340.57	1284.4	154.14	23.37	4	>sp|Q15393|SF3B3_HUMAN Splicing factor 3B subunit 3 OS=Homo sapiens GN=SF3B3 PE=1 SV=4	15682	YJC_160818_PC9mem_AALmnp_G_01.14147.14147.5	controllerType=0 controllerNumber=1 scan=14147	90.1501
12375:3	22	R.WVTTASLLDYDTVAGADKFGNIC[+57.021]VVR.L		C[+57]	957.818	3	2871.44	2871.43	0	1.4	1032	Specific	963.92	883.14	883.14	16.58	4	>sp|Q15393|SF3B3_HUMAN Splicing factor 3B subunit 3 OS=Homo sapiens GN=SF3B3 PE=1 SV=4	15682	YJC_160818_PC9mem_AALmnp_G_01.10695.10695.3	controllerType=0 controllerNumber=1 scan=10695	68.7309
15522:5	22	K.TTLIPGGSESLVYTTLSGGIGILVPFTSHEDHDFFQHVEMHLR.S			948.477	5	4738.36	4738.36	0	-0.6	1107	Specific	306.76	8.57	8.57	0.5	4	>sp|Q15393|SF3B3_HUMAN Splicing factor 3B subunit 3 OS=Homo sapiens GN=SF3B3 PE=1 SV=4	15682	YJC_160818_PC9mem_AALmnp_G_01.13612.13612.5	controllerType=0 controllerNumber=1 scan=13612	86.7235
15562:4	22	K.TTLIPGGSESLVYTTLSGGIGILVPFTSHEDHDFFQHVEMHLR.S			1185.34	4	4738.36	4738.36	0	-1.2	1107	Specific	749.92	746.95	369.65	11.02	4	>sp|Q15393|SF3B3_HUMAN Splicing factor 3B subunit 3 OS=Homo sapiens GN=SF3B3 PE=1 SV=4	15682	YJC_160818_PC9mem_AALmnp_G_01.13642.13642.4	controllerType=0 controllerNumber=1 scan=13642	86.8967
15524:5	22	K.TTLIPGGSESLVYTTLSGGIGILVPFTSHEDHDFFQHVEMHLR.S			948.477	5	4738.36	4738.36	0	-0.6	1107	Specific	961.63	929.33	220.44	16.3	4	>sp|Q15393|SF3B3_HUMAN Splicing factor 3B subunit 3 OS=Homo sapiens GN=SF3B3 PE=1 SV=4	15682	YJC_160818_PC9mem_AALmnp_G_01.13613.13613.5	controllerType=0 controllerNumber=1 scan=13613	86.7296
19641:4	23	K.MLGSPVDSVLFYAITTLHNLLLHQEGAK.M			767.662	4	3067.62	3067.63	0	-1.1	243	Specific	562.94	418.21	418.21	7.82	3	>sp|P35222|CTNB1_HUMAN Catenin beta-1 OS=Homo sapiens GN=CTNNB1 PE=1 SV=1	4057	YJC_160818_PC9mem_AALmnp_G_01.17370.17370.4	controllerType=0 controllerNumber=1 scan=17370	111.313
19643:4	23	K.MLGSPVDSVLFYAITTLHNLLLHQEGAK.M			767.662	4	3067.62	3067.63	0	-1.1	243	Specific	1204.67	1160.15	1160.15	21.74	3	>sp|P35222|CTNB1_HUMAN Catenin beta-1 OS=Homo sapiens GN=CTNNB1 PE=1 SV=1	4057	YJC_160818_PC9mem_AALmnp_G_01.17371.17371.4	controllerType=0 controllerNumber=1 scan=17371	111.32
13786:4	23	R.VAAGVLC[+57.021]ELAQDKEAAEAIEAEGATAPLTELLHSR.N		C[+57]	909.213	4	3633.83	3633.84	0	-3.8	613	Specific	442.42	294.76	294.76	4.57	3	>sp|P35222|CTNB1_HUMAN Catenin beta-1 OS=Homo sapiens GN=CTNNB1 PE=1 SV=1	4057	YJC_160818_PC9mem_AALmnp_G_01.11926.11926.4	controllerType=0 controllerNumber=1 scan=11926	76.3279
13788:4	23	R.VAAGVLC[+57.021]ELAQDKEAAEAIEAEGATAPLTELLHSR.N		C[+57]	909.213	4	3633.83	3633.84	0	-3.8	613	Specific	1068.74	963.51	963.51	18.71	3	>sp|P35222|CTNB1_HUMAN Catenin beta-1 OS=Homo sapiens GN=CTNNB1 PE=1 SV=1	4057	YJC_160818_PC9mem_AALmnp_G_01.11927.11927.4	controllerType=0 controllerNumber=1 scan=11927	76.331
15203:4	23	R.VAAGVLC[+57.021]ELAQDKEAAEAIEAEGATAPLTELLHSRNEGVATYAAAVLFR.M		C[+57]	1274.91	4	5096.6	5096.6	0	0.6	613	Specific	720.4	317.32	46.4	9.23	3	>sp|P35222|CTNB1_HUMAN Catenin beta-1 OS=Homo sapiens GN=CTNNB1 PE=1 SV=1	4057	YJC_160818_PC9mem_AALmnp_G_01.13284.13284.4	controllerType=0 controllerNumber=1 scan=13284	84.6337
15204:4	23	R.VAAGVLC[+57.021]ELAQDKEAAEAIEAEGATAPLTELLHSRNEGVATYAAAVLFR.M		C[+57]	1274.91	4	5096.6	5096.6	0	0.6	613	Specific	1128.5	1114.92	220.38	19.15	3	>sp|P35222|CTNB1_HUMAN Catenin beta-1 OS=Homo sapiens GN=CTNNB1 PE=1 SV=1	4057	YJC_160818_PC9mem_AALmnp_G_01.13285.13285.4	controllerType=0 controllerNumber=1 scan=13285	84.6362
07028:4	24	K.C[+57.021]GLSQSQGN[+1913.677]LSHVDWFSVHK.E	HexNAc(4)Hex(5)NeuAc(1)	C[+57], N[+1914]	1050.94	4	4200.75	4199.75	1	-0.3	48	Specific	139.86	50.96	18.88	1.71	11	>sp|P43121|MUC18_HUMAN Cell surface glycoprotein MUC18 OS=Homo sapiens GN=MCAM PE=1 SV=2	10760	YJC_160818_PC9mem_AALmnp_G_01.6335.6335.2	controllerType=0 controllerNumber=1 scan=6335	43.1694
09250:3	24	K.C[+57.021]GLSQSQGN[+2188.740]LSHVDWFSVHK.E	HexNAc(2)Hex(11)	C[+57], N[+2189]	1492.28	3	4474.83	4474.81	0	4.4	48	Specific	192.81	27.72	9.06	1.76	11	>sp|P43121|MUC18_HUMAN Cell surface glycoprotein MUC18 OS=Homo sapiens GN=MCAM PE=1 SV=2	10760	YJC_160818_PC9mem_AALmnp_G_01.8082.8082.3	controllerType=0 controllerNumber=1 scan=8082	53.3414
07004:4	24	K.C[+57.021]GLSQSQGN[+2060.755]LSHVDWFSVHK.E	HexNAc(4)Hex(5)Fuc(3)	C[+57], N[+2061]	1087.21	4	4345.83	4346.83	-1	0.4	48	Specific	207.88	11.73	7.91	0.99	11	>sp|P43121|MUC18_HUMAN Cell surface glycoprotein MUC18 OS=Homo sapiens GN=MCAM PE=1 SV=2	10760	YJC_160818_PC9mem_AALmnp_G_01.6318.6318.4	controllerType=0 controllerNumber=1 scan=6318	43.0672
07488:4	24	K.C[+57.021]GLSQSQGN[+2205.793]LSHVDWFSVHK.E	HexNAc(4)Hex(5)Fuc(2)NeuAc(1)	C[+57], N[+2206]	1123.72	4	4491.85	4491.86	0	-2.8	48	Specific	315.61	97.25	11.38	3.86	11	>sp|P43121|MUC18_HUMAN Cell surface glycoprotein MUC18 OS=Homo sapiens GN=MCAM PE=1 SV=2	10760	YJC_160818_PC9mem_AALmnp_G_01.6700.6700.4	controllerType=0 controllerNumber=1 scan=6700	45.3231
07520:3	24	K.C[+57.021]GLSQSQGN[+2205.793]LSHVDWFSVHK.E	HexNAc(4)Hex(5)Fuc(2)NeuAc(1)	C[+57], N[+2206]	1497.96	3	4491.86	4491.86	0	-1	48	Specific	342.63	211.52	7	4.98	11	>sp|P43121|MUC18_HUMAN Cell surface glycoprotein MUC18 OS=Homo sapiens GN=MCAM PE=1 SV=2	10760	YJC_160818_PC9mem_AALmnp_G_01.6724.6724.3	controllerType=0 controllerNumber=1 scan=6724	45.4607
08672:3	24	K.C[+57.021]GLSQ[+0.984]SQGN[+1897.682]LSHVDWFSVHK.E	HexNAc(4)Hex(4)Fuc(1)NeuAc(1)	C[+57], N[+1898], Q[+1]	1395.25	3	4183.73	4184.74	-1	-0.3	48	Specific	224.23	52.58	16.57	3.35	11	>sp|P43121|MUC18_HUMAN Cell surface glycoprotein MUC18 OS=Homo sapiens GN=MCAM PE=1 SV=2	10760	YJC_160818_PC9mem_AALmnp_G_01.7642.7642.3	controllerType=0 controllerNumber=1 scan=7642	50.8044
08692:3	24	K.C[+57.021]GLSQ[+0.984]SQGN[+1938.709]LSHVDWFSVHK.E	HexNAc(5)Hex(3)Fuc(1)NeuAc(1)	C[+57], N[+1939], Q[+1]	1409.26	3	4225.75	4225.76	0	-3.2	48	Specific	240.02	58.52	18.87	3.59	11	>sp|P43121|MUC18_HUMAN Cell surface glycoprotein MUC18 OS=Homo sapiens GN=MCAM PE=1 SV=2	10760	YJC_160818_PC9mem_AALmnp_G_01.7654.7654.3	controllerType=0 controllerNumber=1 scan=7654	50.8722
06097:5	24	K.C[+57.021]GLSQSQGN[+1914.697]LSHVDWFSVHKEK.R	HexNAc(4)Hex(5)Fuc(2)	C[+57], N[+1915]	892.385	5	4457.9	4457.91	0	-2.4	48	Specific	335.15	53.95	53.95	3.51	11	>sp|P43121|MUC18_HUMAN Cell surface glycoprotein MUC18 OS=Homo sapiens GN=MCAM PE=1 SV=2	10760	YJC_160818_PC9mem_AALmnp_G_01.5629.5629.5	controllerType=0 controllerNumber=1 scan=5629	38.8626
11719:3	24	R.VHIQSSQTVESSGLYTLQSILK.A			806.764	3	2418.28	2418.29	0	-3.9	188	Specific	478.38	283.24	283.24	5.23	11	>sp|P43121|MUC18_HUMAN Cell surface glycoprotein MUC18 OS=Homo sapiens GN=MCAM PE=1 SV=2	10760	YJC_160818_PC9mem_AALmnp_G_01.10144.10144.3	controllerType=0 controllerNumber=1 scan=10144	65.3847
11721:3	24	R.VHIQSSQTVESSGLYTLQSILK.A			806.764	3	2418.28	2418.29	0	-3.9	188	Specific	827.65	751.27	751.27	13.86	11	>sp|P43121|MUC18_HUMAN Cell surface glycoprotein MUC18 OS=Homo sapiens GN=MCAM PE=1 SV=2	10760	YJC_160818_PC9mem_AALmnp_G_01.10145.10145.3	controllerType=0 controllerNumber=1 scan=10145	65.3914
06580:3	24	K.AQLVKEDKDAQFYC[+57.021]ELNYR.L		C[+57]	797.384	3	2390.14	2390.14	0	-2.7	210	Specific	574.58	470.33	470.33	7.34	11	>sp|P43121|MUC18_HUMAN Cell surface glycoprotein MUC18 OS=Homo sapiens GN=MCAM PE=1 SV=2	10760	YJC_160818_PC9mem_AALmnp_G_01.5981.5981.3	controllerType=0 controllerNumber=1 scan=5981	41.0023
06582:3	24	K.AQLVKEDKDAQFYC[+57.021]ELNYR.L		C[+57]	797.384	3	2390.14	2390.14	0	-2.7	210	Specific	840.74	840.74	840.74	13.65	11	>sp|P43121|MUC18_HUMAN Cell surface glycoprotein MUC18 OS=Homo sapiens GN=MCAM PE=1 SV=2	10760	YJC_160818_PC9mem_AALmnp_G_01.5982.5982.3	controllerType=0 controllerNumber=1 scan=5982	41.006
17720:4	24	K.EHSGRYEC[+57.021]QGLDLDTMISLLSEPQELLVNYVSDVR.V		C[+57]	1017.24	4	4065.94	4065.95	0	-3.7	313	Specific	478.41	146.62	55.21	3.61	11	>sp|P43121|MUC18_HUMAN Cell surface glycoprotein MUC18 OS=Homo sapiens GN=MCAM PE=1 SV=2	10760	YJC_160818_PC9mem_AALmnp_G_01.15641.15641.4	controllerType=0 controllerNumber=1 scan=15641	99.7539
17722:4	24	K.EHSGRYEC[+57.021]QGLDLDTMISLLSEPQELLVNYVSDVR.V		C[+57]	1017.24	4	4065.94	4065.95	0	-3.7	313	Specific	800.96	714.42	161.16	13.71	11	>sp|P43121|MUC18_HUMAN Cell surface glycoprotein MUC18 OS=Homo sapiens GN=MCAM PE=1 SV=2	10760	YJC_160818_PC9mem_AALmnp_G_01.15642.15642.4	controllerType=0 controllerNumber=1 scan=15642	99.7568
12715:4	24	R.VSPAAPERQEGSSLTLTC[+57.021]EAESSQDLEFQWLREETGQVLER.G		C[+57]	1166.56	4	4663.21	4663.22	0	-1.6	348	Specific	893.8	502.89	31.75	14.49	11	>sp|P43121|MUC18_HUMAN Cell surface glycoprotein MUC18 OS=Homo sapiens GN=MCAM PE=1 SV=2	10760	YJC_160818_PC9mem_AALmnp_G_01.10999.10999.4	controllerType=0 controllerNumber=1 scan=10999	70.643
12716:4	24	R.VSPAAPERQEGSSLTLTC[+57.021]EAESSQDLEFQWLREETGQVLER.G		C[+57]	1166.56	4	4663.21	4663.22	0	-1.6	348	Specific	953.07	940.46	177.15	16.49	11	>sp|P43121|MUC18_HUMAN Cell surface glycoprotein MUC18 OS=Homo sapiens GN=MCAM PE=1 SV=2	10760	YJC_160818_PC9mem_AALmnp_G_01.11000.11000.4	controllerType=0 controllerNumber=1 scan=11000	70.6488
12251:3	25	R.MMILYC[+57.021]TLLASAQSEAEKER.I		C[+57]	782.047	3	2344.13	2344.13	0	-3.8	326	Specific	315.06	159.87	159.87	3.68	6	>sp|O75643|U520_HUMAN U5 small nuclear ribonucleoprotein 200 kDa helicase OS=Homo sapiens GN=SNRNP200 PE=1 SV=2	18458	YJC_160818_PC9mem_AALmnp_G_01.10585.10585.3	controllerType=0 controllerNumber=1 scan=10585	68.0372
12252:3	25	R.MMILYC[+57.021]TLLASAQSEAEKER.I		C[+57]	782.047	3	2344.13	2344.13	0	-3.8	326	Specific	681.43	577.63	577.63	10.9	6	>sp|O75643|U520_HUMAN U5 small nuclear ribonucleoprotein 200 kDa helicase OS=Homo sapiens GN=SNRNP200 PE=1 SV=2	18458	YJC_160818_PC9mem_AALmnp_G_01.10586.10586.3	controllerType=0 controllerNumber=1 scan=10586	68.0444
15339:5	25	R.VDRTLVEDLFADKHIQVLVSTATLAWGVNLPAHTVIIK.G			837.469	5	4183.31	4183.33	0	-3.1	792	Specific	648.96	501.73	13.01	9.38	6	>sp|O75643|U520_HUMAN U5 small nuclear ribonucleoprotein 200 kDa helicase OS=Homo sapiens GN=SNRNP200 PE=1 SV=2	18458	YJC_160818_PC9mem_AALmnp_G_01.13432.13432.5	controllerType=0 controllerNumber=1 scan=13432	85.5724
15341:5	25	R.VDRTLVEDLFADKHIQVLVSTATLAWGVNLPAHTVIIK.G			837.469	5	4183.31	4183.33	0	-3.1	792	Specific	836.96	836.96	109.66	13.38	6	>sp|O75643|U520_HUMAN U5 small nuclear ribonucleoprotein 200 kDa helicase OS=Homo sapiens GN=SNRNP200 PE=1 SV=2	18458	YJC_160818_PC9mem_AALmnp_G_01.13433.13433.5	controllerType=0 controllerNumber=1 scan=13433	85.5786
13640:4	25	R.IASHYYITNDTVQTYNQLLKPTLSEIELFR.V			893.466	4	3570.84	3570.85	0	-1.1	987	Specific	464.14	192.69	192.69	4.61	6	>sp|O75643|U520_HUMAN U5 small nuclear ribonucleoprotein 200 kDa helicase OS=Homo sapiens GN=SNRNP200 PE=1 SV=2	18458	YJC_160818_PC9mem_AALmnp_G_01.11806.11806.4	controllerType=0 controllerNumber=1 scan=11806	75.6165
13642:4	25	R.IASHYYITNDTVQTYNQLLKPTLSEIELFR.V			893.466	4	3570.84	3570.85	0	-1.1	987	Specific	814.73	797.19	797.19	13.74	6	>sp|O75643|U520_HUMAN U5 small nuclear ribonucleoprotein 200 kDa helicase OS=Homo sapiens GN=SNRNP200 PE=1 SV=2	18458	YJC_160818_PC9mem_AALmnp_G_01.11807.11807.4	controllerType=0 controllerNumber=1 scan=11807	75.6227
13323:7	25	R.IVALSSSLSNAKDVAHWLGC[+57.021]SATSTFNFHPNVRPVPLELHIQGFNISHTQTR.L		C[+57]	822.853	7	5753.93	5754.93	-1	-0.6	1487	Specific	801.63	768.13	768.13	12.91	6	>sp|O75643|U520_HUMAN U5 small nuclear ribonucleoprotein 200 kDa helicase OS=Homo sapiens GN=SNRNP200 PE=1 SV=2	18458	YJC_160818_PC9mem_AALmnp_G_01.11524.11524.7	controllerType=0 controllerNumber=1 scan=11524	73.8718
12423:7	25	K.DVAHWLGC[+57.021]SATSTFNFHPNVRPVPLELHIQGFNISHTQTRLLSMAKPVYHAITK.H		C[+57]	877.599	7	6137.15	6137.15	0	-1	1499	Specific	788.14	655.68	50.99	11.77	6	>sp|O75643|U520_HUMAN U5 small nuclear ribonucleoprotein 200 kDa helicase OS=Homo sapiens GN=SNRNP200 PE=1 SV=2	18458	YJC_160818_PC9mem_AALmnp_G_01.10732.10732.7	controllerType=0 controllerNumber=1 scan=10732	68.9567
01136:10	25	K.DVAHWLGC[+57.021]SATSTFNFHPNVRPVPLELHIQGFN[+2262.814]ISHTQ[+0.984]TRLLSMAKPVYHAITKHSPK.K	HexNAc(5)Hex(5)Fuc(1)NeuAc(1)	C[+57], N[+2263], Q[+1]	886.027	10	8851.2	8850.19	1	1	1499	Specific	411.82	39.43	6.98	0.55	6	>sp|O75643|U520_HUMAN U5 small nuclear ribonucleoprotein 200 kDa helicase OS=Homo sapiens GN=SNRNP200 PE=1 SV=2	18458	YJC_160818_PC9mem_AALmnp_G_01.1854.1854.7	controllerType=0 controllerNumber=1 scan=1854	16.3931
10827:4	26	R.AKITYYQNTLTVMINNGFTPDKN[+0.984]DYEFC[+57.021]AK.V		C[+57], N[+1]	890.922	4	3560.66	3560.67	0	-1.9	203	Specific	517.14	271.83	17.86	5.06	5	>sp|P49257|LMAN1_HUMAN Protein ERGIC-53 OS=Homo sapiens GN=LMAN1 PE=1 SV=2	9479	YJC_160818_PC9mem_AALmnp_G_01.9376.9376.4	controllerType=0 controllerNumber=1 scan=9376	61.0699
10829:4	26	R.AKITYYQNTLTVMINN[+0.984]GFTPDKNDYEFC[+57.021]AK.V		C[+57], N[+1]	890.922	4	3560.66	3560.67	0	-1.9	203	Specific	935.65	817.55	39.03	15.7	5	>sp|P49257|LMAN1_HUMAN Protein ERGIC-53 OS=Homo sapiens GN=LMAN1 PE=1 SV=2	9479	YJC_160818_PC9mem_AALmnp_G_01.9377.9377.4	controllerType=0 controllerNumber=1 scan=9377	61.0761
12152:3	26	K.ITYYQNTLTVMINNGFTPDKNDYEFC[+57.021]AK.V		C[+57]	1120.86	3	3360.56	3360.56	0	2.4	205	Specific	849.95	771.37	771.37	13.57	5	>sp|P49257|LMAN1_HUMAN Protein ERGIC-53 OS=Homo sapiens GN=LMAN1 PE=1 SV=2	9479	YJC_160818_PC9mem_AALmnp_G_01.10491.10491.3	controllerType=0 controllerNumber=1 scan=10491	67.4469
12151:3	26	K.ITYYQNTLTVMINNGFTPDKNDYEFC[+57.021]AK.V		C[+57]	1120.86	3	3360.56	3360.56	0	2.4	205	Specific	863.76	622.96	622.96	14.57	5	>sp|P49257|LMAN1_HUMAN Protein ERGIC-53 OS=Homo sapiens GN=LMAN1 PE=1 SV=2	9479	YJC_160818_PC9mem_AALmnp_G_01.10490.10490.3	controllerType=0 controllerNumber=1 scan=10490	67.4441
08131:4	26	R.LVSGMQHPGSAGGVYETTQHFIDIKEHLHIVKR.D			921.98	4	3684.9	3684.91	0	-2.7	416	Specific	787.01	568.68	568.68	11.99	5	>sp|P49257|LMAN1_HUMAN Protein ERGIC-53 OS=Homo sapiens GN=LMAN1 PE=1 SV=2	9479	YJC_160818_PC9mem_AALmnp_G_01.7220.7220.4	controllerType=0 controllerNumber=1 scan=7220	48.3368
08132:4	26	R.LVSGMQHPGSAGGVYETTQHFIDIKEHLHIVKR.D			921.98	4	3684.9	3684.91	0	-2.7	416	Specific	1303.68	1180.98	1180.98	22.99	5	>sp|P49257|LMAN1_HUMAN Protein ERGIC-53 OS=Homo sapiens GN=LMAN1 PE=1 SV=2	9479	YJC_160818_PC9mem_AALmnp_G_01.7221.7221.4	controllerType=0 controllerNumber=1 scan=7221	48.3434
22375:4	26	K.C[+57.021]PELPPFPSC[+57.021]LSTVHFIIFVVVQTVLFIGYIMYRSQQEAAAK.K		C[+57]*2	1214.88	4	4856.52	4856.5	0	3	466	Specific	597.28	597.28	191.96	8.36	5	>sp|P49257|LMAN1_HUMAN Protein ERGIC-53 OS=Homo sapiens GN=LMAN1 PE=1 SV=2	9479	YJC_160818_PC9mem_AALmnp_G_01.19687.19687.4	controllerType=0 controllerNumber=1 scan=19687	126.942
22373:4	26	K.C[+57.021]PELPPFPSC[+57.021]LSTVHFIIFVVVQTVLFIGYIMYRSQQEAAAK.K		C[+57]*2	1214.88	4	4856.52	4856.5	0	3	466	Specific	676.23	207.71	48.76	8.07	5	>sp|P49257|LMAN1_HUMAN Protein ERGIC-53 OS=Homo sapiens GN=LMAN1 PE=1 SV=2	9479	YJC_160818_PC9mem_AALmnp_G_01.19686.19686.4	controllerType=0 controllerNumber=1 scan=19686	126.934
21313:4	27	K.NLMITEALLTLTENIIIPFSGWPEGDYPK.A			819.676	4	3275.68	3275.69	0	-2.4	517	Specific	596.67	596.67	596.67	7.97	4	>sp|Q99959|PKP2_HUMAN Plakophilin-2 OS=Homo sapiens GN=PKP2 PE=1 SV=2	13152	YJC_160818_PC9mem_AALmnp_G_01.18869.18869.4	controllerType=0 controllerNumber=1 scan=18869	121.684
21327:3	27	K.NLMITEALLTLTENIIIPFSGWPEGDYPK.A			1092.57	3	3275.69	3275.69	0	0.6	517	Specific	640.08	640.08	640.08	9.06	4	>sp|Q99959|PKP2_HUMAN Plakophilin-2 OS=Homo sapiens GN=PKP2 PE=1 SV=2	13152	YJC_160818_PC9mem_AALmnp_G_01.18880.18880.3	controllerType=0 controllerNumber=1 scan=18880	121.758
21325:3	27	K.NLMITEALLTLTENIIIPFSGWPEGDYPK.A			1092.57	3	3275.69	3275.69	0	0.6	517	Specific	671.17	377.75	377.75	8.89	4	>sp|Q99959|PKP2_HUMAN Plakophilin-2 OS=Homo sapiens GN=PKP2 PE=1 SV=2	13152	YJC_160818_PC9mem_AALmnp_G_01.18879.18879.3	controllerType=0 controllerNumber=1 scan=18879	121.751
21311:4	27	K.NLMITEALLTLTENIIIPFSGWPEGDYPK.A			819.676	4	3275.68	3275.69	0	-2.4	517	Specific	690.27	394.77	394.77	9.97	4	>sp|Q99959|PKP2_HUMAN Plakophilin-2 OS=Homo sapiens GN=PKP2 PE=1 SV=2	13152	YJC_160818_PC9mem_AALmnp_G_01.18868.18868.4	controllerType=0 controllerNumber=1 scan=18868	121.68
12719:5	27	R.GTIADYQPDDKATENC[+57.021]VC[+57.021]ILHNLSYQLEAELPEKYSQNIYIQNR.N		C[+57]*2	1043.7	5	5214.48	5214.48	0	1.1	592	Specific	466.55	161.24	29.2	3.45	4	>sp|Q99959|PKP2_HUMAN Plakophilin-2 OS=Homo sapiens GN=PKP2 PE=1 SV=2	13152	YJC_160818_PC9mem_AALmnp_G_01.11003.11003.5	controllerType=0 controllerNumber=1 scan=11003	70.6591
12721:5	27	R.GTIADYQPDDKATENC[+57.021]VC[+57.021]ILHNLSYQLEAELPEKYSQNIYIQNR.N		C[+57]*2	1043.7	5	5214.48	5214.48	0	1.1	592	Specific	1240.18	1198.04	205.16	21.27	4	>sp|Q99959|PKP2_HUMAN Plakophilin-2 OS=Homo sapiens GN=PKP2 PE=1 SV=2	13152	YJC_160818_PC9mem_AALmnp_G_01.11004.11004.5	controllerType=0 controllerNumber=1 scan=11004	70.6618
18927:4	27	R.NLSLQNEIAKETLPDLVSIIPDTVPSTDLLIETTASAC[+57.021]YTLNNIIQNSYQNAR.D		C[+57]	1469.25	4	5873.97	5875	-1	-4.6	759	Specific	971.49	454.41	454.41	15.55	4	>sp|Q99959|PKP2_HUMAN Plakophilin-2 OS=Homo sapiens GN=PKP2 PE=1 SV=2	13152	YJC_160818_PC9mem_AALmnp_G_01.16733.16733.2	controllerType=0 controllerNumber=1 scan=16733	106.999
09633:3	27	K.AASVLLYSLWAHTELHHAYKK.A			813.435	3	2438.29	2438.3	0	-3.4	839	Specific	486.84	272.77	272.77	4.89	4	>sp|Q99959|PKP2_HUMAN Plakophilin-2 OS=Homo sapiens GN=PKP2 PE=1 SV=2	13152	YJC_160818_PC9mem_AALmnp_G_01.8401.8401.3	controllerType=0 controllerNumber=1 scan=8401	55.2639
09635:3	27	K.AASVLLYSLWAHTELHHAYKK.A			813.435	3	2438.29	2438.3	0	-3.4	839	Specific	785.24	616.87	616.87	12.22	4	>sp|Q99959|PKP2_HUMAN Plakophilin-2 OS=Homo sapiens GN=PKP2 PE=1 SV=2	13152	YJC_160818_PC9mem_AALmnp_G_01.8402.8402.3	controllerType=0 controllerNumber=1 scan=8402	55.2703
16388:4	28	K.QIFLGGVDKRTQFWLYFAGNLASGGAAGATSLC[+57.021]FVYPLDFAR.T		C[+57]	1147.32	4	4586.27	4585.31	1	-10.2	97	Specific	302.66	278.87	30.54	3.83	9	>sp|P05141|ADT2_HUMAN ADP/ATP translocase 2 OS=Homo sapiens GN=SLC25A5 PE=1 SV=7	514	YJC_160818_PC9mem_AALmnp_G_01.14447.14447.3	controllerType=0 controllerNumber=1 scan=14447	92.0539
16386:4	28	K.QIFLGGVDKRTQFWLYFAGNLASGGAAGATSLC[+57.021]FVYPLDFAR.T		C[+57]	1147.32	4	4586.27	4585.31	1	-10.2	97	Specific	407.17	86.35	52.55	1.47	9	>sp|P05141|ADT2_HUMAN ADP/ATP translocase 2 OS=Homo sapiens GN=SLC25A5 PE=1 SV=7	514	YJC_160818_PC9mem_AALmnp_G_01.14446.14446.3	controllerType=0 controllerNumber=1 scan=14446	92.048
11933:3	28	K.IYKSDGIKGLYQGFNVSVQGIIIYR.A			944.52	3	2831.54	2831.55	0	-0.4	164	Specific	667.15	522.4	522.4	10.1	9	>sp|P05141|ADT2_HUMAN ADP/ATP translocase 2 OS=Homo sapiens GN=SLC25A5 PE=1 SV=7	514	YJC_160818_PC9mem_AALmnp_G_01.10305.10305.3	controllerType=0 controllerNumber=1 scan=10305	66.3123
11935:3	28	K.IYKSDGIKGLYQGFNVSVQGIIIYR.A			944.52	3	2831.54	2831.55	0	-0.4	164	Specific	857.81	712.84	712.84	14.49	9	>sp|P05141|ADT2_HUMAN ADP/ATP translocase 2 OS=Homo sapiens GN=SLC25A5 PE=1 SV=7	514	YJC_160818_PC9mem_AALmnp_G_01.10306.10306.3	controllerType=0 controllerNumber=1 scan=10306	66.3154
19509:4	28	K.GMLPDPKNTHIVISWMIAQTVTAVAGLTSYPFDTVR.R			983.263	4	3930.03	3930.03	0	-0.1	200	Specific	380.25	147.75	147.75	3.41	9	>sp|P05141|ADT2_HUMAN ADP/ATP translocase 2 OS=Homo sapiens GN=SLC25A5 PE=1 SV=7	514	YJC_160818_PC9mem_AALmnp_G_01.17258.17258.4	controllerType=0 controllerNumber=1 scan=17258	110.578
19343:5	28	K.GMLPDPKNTHIVISWMIAQTVTAVAGLTSYPFDTVR.R			786.811	5	3930.02	3930.03	0	-1.4	200	Specific	431.79	317.89	317.89	4.58	9	>sp|P05141|ADT2_HUMAN ADP/ATP translocase 2 OS=Homo sapiens GN=SLC25A5 PE=1 SV=7	514	YJC_160818_PC9mem_AALmnp_G_01.17075.17075.5	controllerType=0 controllerNumber=1 scan=17075	109.294
19325:3	28	K.GMLPDPKNTHIVISWMIAQTVTAVAGLTSYPFDTVR.R			1310.68	3	3930.03	3930.03	0	-0.5	200	Specific	599.5	292.31	292.31	6.35	9	>sp|P05141|ADT2_HUMAN ADP/ATP translocase 2 OS=Homo sapiens GN=SLC25A5 PE=1 SV=7	514	YJC_160818_PC9mem_AALmnp_G_01.17062.17062.3	controllerType=0 controllerNumber=1 scan=17062	109.214
19326:3	28	K.GMLPDPKNTHIVISWMIAQTVTAVAGLTSYPFDTVR.R			1310.68	3	3930.03	3930.03	0	-0.5	200	Specific	720.81	720.81	720.81	11.38	9	>sp|P05141|ADT2_HUMAN ADP/ATP translocase 2 OS=Homo sapiens GN=SLC25A5 PE=1 SV=7	514	YJC_160818_PC9mem_AALmnp_G_01.17063.17063.3	controllerType=0 controllerNumber=1 scan=17063	109.217
19345:5	28	K.GMLPDPKNTHIVISWMIAQTVTAVAGLTSYPFDTVR.R			786.811	5	3930.02	3930.03	0	-1.4	200	Specific	761.6	710.21	710.21	12.14	9	>sp|P05141|ADT2_HUMAN ADP/ATP translocase 2 OS=Homo sapiens GN=SLC25A5 PE=1 SV=7	514	YJC_160818_PC9mem_AALmnp_G_01.17076.17076.5	controllerType=0 controllerNumber=1 scan=17076	109.301
19511:4	28	K.GMLPDPKNTHIVISWMIAQTVTAVAGLTSYPFDTVR.R			983.263	4	3930.03	3930.03	0	-0.1	200	Specific	804.92	716.23	716.23	13.64	9	>sp|P05141|ADT2_HUMAN ADP/ATP translocase 2 OS=Homo sapiens GN=SLC25A5 PE=1 SV=7	514	YJC_160818_PC9mem_AALmnp_G_01.17259.17259.4	controllerType=0 controllerNumber=1 scan=17259	110.585
20016:4	28	K.GMLPDPKNTHIVISWMIAQ[+0.984]TVTAVAGLTSYPFDTVR.R		Q[+1]	983.509	4	3931.02	3931.01	0	0.6	200	Specific	504.45	189.95	80.06	4.07	9	>sp|P05141|ADT2_HUMAN ADP/ATP translocase 2 OS=Homo sapiens GN=SLC25A5 PE=1 SV=7	514	YJC_160818_PC9mem_AALmnp_G_01.17701.17701.4	controllerType=0 controllerNumber=1 scan=17701	113.597
20018:4	28	K.GMLPDPKN[+0.984]THIVISWMIAQTVTAVAGLTSYPFDTVR.R		N[+1]	983.509	4	3931.02	3931.01	0	0.6	200	Specific	563.45	560.72	6.45	7.64	9	>sp|P05141|ADT2_HUMAN ADP/ATP translocase 2 OS=Homo sapiens GN=SLC25A5 PE=1 SV=7	514	YJC_160818_PC9mem_AALmnp_G_01.17702.17702.4	controllerType=0 controllerNumber=1 scan=17702	113.603
18608:5	28	K.GMLPDPKNTHIVISWMIAQTVTAVAGLTSYPFDTVRR.R			818.031	5	4086.12	4086.13	0	-1.6	200	Specific	501.02	327.87	26.12	5.4	9	>sp|P05141|ADT2_HUMAN ADP/ATP translocase 2 OS=Homo sapiens GN=SLC25A5 PE=1 SV=7	514	YJC_160818_PC9mem_AALmnp_G_01.16445.16445.5	controllerType=0 controllerNumber=1 scan=16445	105.058
18634:3	28	K.GMLPDPKNTHIVISWMIAQTVTAVAGLTSYPFDTVRR.R			1362.71	3	4086.12	4086.13	0	-1.5	200	Specific	664.55	650.58	149.22	10.02	9	>sp|P05141|ADT2_HUMAN ADP/ATP translocase 2 OS=Homo sapiens GN=SLC25A5 PE=1 SV=7	514	YJC_160818_PC9mem_AALmnp_G_01.16466.16466.3	controllerType=0 controllerNumber=1 scan=16466	105.196
18633:3	28	K.GMLPDPKNTHIVISWMIAQTVTAVAGLTSYPFDTVRR.R			1362.71	3	4086.12	4086.13	0	-1.5	200	Specific	722.6	394.02	151.28	10.4	9	>sp|P05141|ADT2_HUMAN ADP/ATP translocase 2 OS=Homo sapiens GN=SLC25A5 PE=1 SV=7	514	YJC_160818_PC9mem_AALmnp_G_01.16465.16465.3	controllerType=0 controllerNumber=1 scan=16465	105.189
18610:5	28	K.GMLPDPKNTHIVISWMIAQTVTAVAGLTSYPFDTVRR.R			818.031	5	4086.12	4086.13	0	-1.6	200	Specific	920.83	920.83	88.28	15.61	9	>sp|P05141|ADT2_HUMAN ADP/ATP translocase 2 OS=Homo sapiens GN=SLC25A5 PE=1 SV=7	514	YJC_160818_PC9mem_AALmnp_G_01.16446.16446.5	controllerType=0 controllerNumber=1 scan=16446	105.065
18509:3	28	K.NTHIVISWMIAQTVTAVAGLTSYPFDTVR.R			1064.56	3	3191.65	3191.66	0	-0.3	207	Specific	394.9	83.79	83.79	2.51	9	>sp|P05141|ADT2_HUMAN ADP/ATP translocase 2 OS=Homo sapiens GN=SLC25A5 PE=1 SV=7	514	YJC_160818_PC9mem_AALmnp_G_01.16361.16361.3	controllerType=0 controllerNumber=1 scan=16361	104.486
18529:4	28	K.NTHIVISWMIAQTVTAVAGLTSYPFDTVR.R			798.668	4	3191.65	3191.66	0	-1.9	207	Specific	511.35	341.11	341.11	5.42	9	>sp|P05141|ADT2_HUMAN ADP/ATP translocase 2 OS=Homo sapiens GN=SLC25A5 PE=1 SV=7	514	YJC_160818_PC9mem_AALmnp_G_01.16377.16377.4	controllerType=0 controllerNumber=1 scan=16377	104.597
18511:3	28	K.NTHIVISWMIAQTVTAVAGLTSYPFDTVR.R			1064.56	3	3191.65	3191.66	0	-0.3	207	Specific	760.64	726.38	726.38	12.69	9	>sp|P05141|ADT2_HUMAN ADP/ATP translocase 2 OS=Homo sapiens GN=SLC25A5 PE=1 SV=7	514	YJC_160818_PC9mem_AALmnp_G_01.16362.16362.3	controllerType=0 controllerNumber=1 scan=16362	104.493
18530:4	28	K.NTHIVISWMIAQTVTAVAGLTSYPFDTVR.R			798.668	4	3191.65	3191.66	0	-1.9	207	Specific	800.94	786.26	786.26	13.19	9	>sp|P05141|ADT2_HUMAN ADP/ATP translocase 2 OS=Homo sapiens GN=SLC25A5 PE=1 SV=7	514	YJC_160818_PC9mem_AALmnp_G_01.16378.16378.4	controllerType=0 controllerNumber=1 scan=16378	104.603
20769:3	28	K.N[+0.984]THIVISWMIAQTVTAVAGLTSYPFDTVR.R		N[+1]	1064.89	3	3192.65	3192.64	0	3	207	Specific	282.75	18.19	18.19	0.63	9	>sp|P05141|ADT2_HUMAN ADP/ATP translocase 2 OS=Homo sapiens GN=SLC25A5 PE=1 SV=7	514	YJC_160818_PC9mem_AALmnp_G_01.18371.18371.3	controllerType=0 controllerNumber=1 scan=18371	118.216
20771:3	28	K.N[+0.984]THIVISWMIAQTVTAVAGLTSYPFDTVR.R		N[+1]	1064.89	3	3192.65	3192.64	0	3	207	Specific	545.38	545.38	246.57	7.56	9	>sp|P05141|ADT2_HUMAN ADP/ATP translocase 2 OS=Homo sapiens GN=SLC25A5 PE=1 SV=7	514	YJC_160818_PC9mem_AALmnp_G_01.18372.18372.3	controllerType=0 controllerNumber=1 scan=18372	118.221
16099:2	28	R.GMGGAFVLVLYDEIKKYT.-			1002.53	2	2004.05	2004.05	0	-0.5	281	CRagged	226.8	70.71	70.71	1.74	9	>sp|P05141|ADT2_HUMAN ADP/ATP translocase 2 OS=Homo sapiens GN=SLC25A5 PE=1 SV=7	514	YJC_160818_PC9mem_AALmnp_G_01.14165.14165.2	controllerType=0 controllerNumber=1 scan=14165	90.2506
16097:2	28	R.GMGGAFVLVLYDEIKKYT.-			1002.53	2	2004.05	2004.05	0	-0.5	281	CRagged	399.88	232.29	232.29	4.44	9	>sp|P05141|ADT2_HUMAN ADP/ATP translocase 2 OS=Homo sapiens GN=SLC25A5 PE=1 SV=7	514	YJC_160818_PC9mem_AALmnp_G_01.14164.14164.2	controllerType=0 controllerNumber=1 scan=14164	90.2448
13000:6	29	R.GAEAFEIALPRESN[+1241.454]ITVLIKLGTPTLLAKPC[+57.021]YIVISK.R	HexNAc(3)Hex(3)Fuc(1)	C[+57], N[+1241]	878.626	6	5266.72	5267.73	-1	-1	26	Specific	248.84	22.89	22.89	0.11	34	>sp|Q9H5V8|CDCP1_HUMAN CUB domain-containing protein 1 OS=Homo sapiens GN=CDCP1 PE=1 SV=3	2637	YJC_160818_PC9mem_AALmnp_G_01.11223.11223.4	controllerType=0 controllerNumber=1 scan=11223	71.9682
02522:2	29	R.IGTFC[+57.021]SN[+1914.697]GTVSR.I	HexNAc(4)Hex(5)Fuc(2)	C[+57], N[+1915]	1607.15	2	3213.3	3213.31	0	-3.7	174	Specific	168.8	38.43	38.43	1.53	34	>sp|Q9H5V8|CDCP1_HUMAN CUB domain-containing protein 1 OS=Homo sapiens GN=CDCP1 PE=1 SV=3	2637	YJC_160818_PC9mem_AALmnp_G_01.2868.2868.2	controllerType=0 controllerNumber=1 scan=2868	22.4532
02531:2	29	R.IGTFC[+57.021]SN[+1403.507]GTVSR.I	HexNAc(3)Hex(4)Fuc(1)	C[+57], N[+1404]	1351.56	2	2702.12	2702.12	0	-2.7	174	Specific	182.1	93.02	93.02	2.77	34	>sp|Q9H5V8|CDCP1_HUMAN CUB domain-containing protein 1 OS=Homo sapiens GN=CDCP1 PE=1 SV=3	2637	YJC_160818_PC9mem_AALmnp_G_01.2876.2876.2	controllerType=0 controllerNumber=1 scan=2876	22.5021
02528:3	29	R.IGTFC[+57.021]SN[+1914.697]GTVSR.I	HexNAc(4)Hex(5)Fuc(2)	C[+57], N[+1915]	1071.77	3	3213.3	3213.31	0	-3.9	174	Specific	243.64	11.78	11.78	1.78	34	>sp|Q9H5V8|CDCP1_HUMAN CUB domain-containing protein 1 OS=Homo sapiens GN=CDCP1 PE=1 SV=3	2637	YJC_160818_PC9mem_AALmnp_G_01.2874.2874.3	controllerType=0 controllerNumber=1 scan=2874	22.4961
05994:3	29	R.LQFQVLVQHPQN[+2060.755]ESNK.I	HexNAc(4)Hex(5)Fuc(3)	N[+2061]	1323.92	3	3969.75	3969.75	0	0.6	328	Specific	269.15	105	105	4.16	34	>sp|Q9H5V8|CDCP1_HUMAN CUB domain-containing protein 1 OS=Homo sapiens GN=CDCP1 PE=1 SV=3	2637	YJC_160818_PC9mem_AALmnp_G_01.5553.5553.3	controllerType=0 controllerNumber=1 scan=5553	38.3861
06570:3	29	R.LQFQVLVQHPQN[+2205.793]ESNK.I	HexNAc(4)Hex(5)Fuc(2)NeuAc(1)	N[+2206]	1372.27	3	4114.78	4114.79	0	-0.5	328	Specific	415.07	235.04	2.96	5.27	34	>sp|Q9H5V8|CDCP1_HUMAN CUB domain-containing protein 1 OS=Homo sapiens GN=CDCP1 PE=1 SV=3	2637	YJC_160818_PC9mem_AALmnp_G_01.5975.5975.3	controllerType=0 controllerNumber=1 scan=5975	40.9654
09049:4	29	R.LQFQVLVQHPQN[+2278.809]ESNKIYVVDLSNER.A	HexNAc(5)Hex(6)NeuAc(1)	N[+2279]	1344.86	4	5376.41	5376.42	0	-1.8	328	Specific	204.97	160.06	19.2	3.76	34	>sp|Q9H5V8|CDCP1_HUMAN CUB domain-containing protein 1 OS=Homo sapiens GN=CDCP1 PE=1 SV=3	2637	YJC_160818_PC9mem_AALmnp_G_01.7934.7934.2	controllerType=0 controllerNumber=1 scan=7934	52.5413
09074:4	29	R.LQFQVLVQHPQN[+2715.963]ESNKIYVVDLSNER.A	HexNAc(5)Hex(6)Fuc(1)NeuAc(2)	N[+2716]	1454.4	4	5814.57	5813.57	1	-1.1	328	Specific	220.73	45.47	9.2	3.71	34	>sp|Q9H5V8|CDCP1_HUMAN CUB domain-containing protein 1 OS=Homo sapiens GN=CDCP1 PE=1 SV=3	2637	YJC_160818_PC9mem_AALmnp_G_01.7953.7953.4	controllerType=0 controllerNumber=1 scan=7953	52.6428
09084:4	29	R.LQFQVLVQHPQN[+2424.867]ESNKIYVVDLSNER.A	HexNAc(5)Hex(6)Fuc(1)NeuAc(1)	N[+2425]	1381.63	4	5523.48	5522.47	1	0.4	328	Specific	314.25	59.31	14.07	3.63	34	>sp|Q9H5V8|CDCP1_HUMAN CUB domain-containing protein 1 OS=Homo sapiens GN=CDCP1 PE=1 SV=3	2637	YJC_160818_PC9mem_AALmnp_G_01.7960.7960.4	controllerType=0 controllerNumber=1 scan=7960	52.6836
09072:4	29	R.LQFQVLVQHPQN[+2570.925]ESNKIYVVDLSNER.A	HexNAc(5)Hex(6)Fuc(2)NeuAc(1)	N[+2571]	1418.14	4	5669.54	5668.53	1	1.3	328	Specific	321.59	82.94	82.94	4.02	34	>sp|Q9H5V8|CDCP1_HUMAN CUB domain-containing protein 1 OS=Homo sapiens GN=CDCP1 PE=1 SV=3	2637	YJC_160818_PC9mem_AALmnp_G_01.7951.7951.4	controllerType=0 controllerNumber=1 scan=7951	52.6354
10060:4	29	R.LQFQVLVQHPQN[+2350.830]ESNKIYVVDLSNER.A	HexNAc(4)Hex(5)Fuc(1)NeuAc(2)	N[+2351]	1362.62	4	5447.44	5448.44	-1	1.9	328	Specific	322.89	244.58	27.19	4.82	34	>sp|Q9H5V8|CDCP1_HUMAN CUB domain-containing protein 1 OS=Homo sapiens GN=CDCP1 PE=1 SV=3	2637	YJC_160818_PC9mem_AALmnp_G_01.8744.8744.2	controllerType=0 controllerNumber=1 scan=8744	57.3186
09146:4	29	R.LQFQVLVQHPQN[+2188.740]ESNKIYVVDLSNER.A	HexNAc(2)Hex(11)	N[+2189]	1322.1	4	5285.37	5286.35	-1	4.5	328	Specific	416.67	333.44	333.44	5.27	34	>sp|Q9H5V8|CDCP1_HUMAN CUB domain-containing protein 1 OS=Homo sapiens GN=CDCP1 PE=1 SV=3	2637	YJC_160818_PC9mem_AALmnp_G_01.8002.8002.2	controllerType=0 controllerNumber=1 scan=8002	52.897
09148:5	29	R.LQFQVLVQHPQN[+2060.755]ESNKIYVVDLSNER.A	HexNAc(4)Hex(5)Fuc(3)	N[+2061]	1032.48	5	5158.37	5158.36	0	0.7	328	Specific	494.33	217.92	8	5.16	34	>sp|Q9H5V8|CDCP1_HUMAN CUB domain-containing protein 1 OS=Homo sapiens GN=CDCP1 PE=1 SV=3	2637	YJC_160818_PC9mem_AALmnp_G_01.8005.8005.5	controllerType=0 controllerNumber=1 scan=8005	52.9179
09522:3	29	R.LQFQVLVQHPQN[+2205.793]ESNKIYVVDLSNER.A	HexNAc(4)Hex(5)Fuc(2)NeuAc(1)	N[+2206]	1768.46	3	5303.37	5303.4	0	-4.9	328	Specific	513.34	299.47	24.87	5.8	34	>sp|Q9H5V8|CDCP1_HUMAN CUB domain-containing protein 1 OS=Homo sapiens GN=CDCP1 PE=1 SV=3	2637	YJC_160818_PC9mem_AALmnp_G_01.8321.8321.3	controllerType=0 controllerNumber=1 scan=8321	54.8593
09112:4	29	R.LQFQVLVQHPQN[+2205.793]ESNKIYVVDLSNER.A	HexNAc(4)Hex(5)Fuc(2)NeuAc(1)	N[+2206]	1326.86	4	5304.4	5303.4	1	0	328	Specific	532.4	177.25	16.68	5.85	34	>sp|Q9H5V8|CDCP1_HUMAN CUB domain-containing protein 1 OS=Homo sapiens GN=CDCP1 PE=1 SV=3	2637	YJC_160818_PC9mem_AALmnp_G_01.7980.7980.4	controllerType=0 controllerNumber=1 scan=7980	52.7857
09131:4	29	R.LQFQVLVQHPQN[+1914.697]ESNKIYVVDLSNER.A	HexNAc(4)Hex(5)Fuc(2)	N[+1915]	1253.83	4	5012.3	5012.3	0	-0.6	328	Specific	610.09	291.12	73.63	8.63	34	>sp|Q9H5V8|CDCP1_HUMAN CUB domain-containing protein 1 OS=Homo sapiens GN=CDCP1 PE=1 SV=3	2637	YJC_160818_PC9mem_AALmnp_G_01.7993.7993.4	controllerType=0 controllerNumber=1 scan=7993	52.8514
09050:4	29	R.LQFQVLVQHPQN[+2279.830]ESN[+0.984]KIYVVDLSNER.A	HexNAc(5)Hex(6)Fuc(2)	N[+1][+2280]	1345.61	4	5379.43	5378.42	1	2	328	Specific	173.09	102.69	0	3.24	34	>sp|Q9H5V8|CDCP1_HUMAN CUB domain-containing protein 1 OS=Homo sapiens GN=CDCP1 PE=1 SV=3	2637	YJC_160818_PC9mem_AALmnp_G_01.7934.7934.2	controllerType=0 controllerNumber=1 scan=7934	52.5413
09760:4	29	R.LQFQVLVQHPQ[+0.984]N[+2205.793]ESNKIYVVDLSNER.A	HexNAc(4)Hex(5)Fuc(2)NeuAc(1)	N[+2206], Q[+1]	1326.85	4	5304.36	5304.38	0	-3.6	328	Specific	349.72	63.72	4.54	4.21	34	>sp|Q9H5V8|CDCP1_HUMAN CUB domain-containing protein 1 OS=Homo sapiens GN=CDCP1 PE=1 SV=3	2637	YJC_160818_PC9mem_AALmnp_G_01.8495.8495.4	controllerType=0 controllerNumber=1 scan=8495	55.8259
01608:3	29	R.TC[+57.021]SSN[+1914.697]LTLTSGSK.H	HexNAc(4)Hex(5)Fuc(2)	C[+57], N[+1915]	1090.78	3	3270.34	3270.34	0	-2.4	382	Specific	116.75	40.95	40.95	1.04	34	>sp|Q9H5V8|CDCP1_HUMAN CUB domain-containing protein 1 OS=Homo sapiens GN=CDCP1 PE=1 SV=3	2637	YJC_160818_PC9mem_AALmnp_G_01.2203.2203.3	controllerType=0 controllerNumber=1 scan=2203	18.5766
01554:3	29	R.TC[+57.021]SSN[+2060.755]LTLTSGSK.H	HexNAc(4)Hex(5)Fuc(3)	C[+57], N[+2061]	1139.47	3	3416.4	3416.4	0	-1.9	382	Specific	176.07	75.32	75.32	1.54	34	>sp|Q9H5V8|CDCP1_HUMAN CUB domain-containing protein 1 OS=Homo sapiens GN=CDCP1 PE=1 SV=3	2637	YJC_160818_PC9mem_AALmnp_G_01.2163.2163.3	controllerType=0 controllerNumber=1 scan=2163	18.3269
02115:3	29	R.TC[+57.021]SSN[+2205.793]LTLTSGSK.H	HexNAc(4)Hex(5)Fuc(2)NeuAc(1)	C[+57], N[+2206]	1187.82	3	3561.44	3561.44	0	-1.2	382	Specific	176.22	70.43	70.43	1.54	34	>sp|Q9H5V8|CDCP1_HUMAN CUB domain-containing protein 1 OS=Homo sapiens GN=CDCP1 PE=1 SV=3	2637	YJC_160818_PC9mem_AALmnp_G_01.2553.2553.3	controllerType=0 controllerNumber=1 scan=2553	20.6342
12561:6	29	R.LSLVLVPAQKLQQHTHEKPC[+57.021]N[+2059.735]TSFSYLVASAIPSQDLYFGSFC[+57.021]PGGSIK.Q	HexNAc(4)Hex(5)Fuc(1)NeuAc(1)	C[+57]*2, N[+2060]	1247.58	6	7480.47	7480.48	0	-1.3	457	Specific	349.63	239.92	10.93	4.63	34	>sp|Q9H5V8|CDCP1_HUMAN CUB domain-containing protein 1 OS=Homo sapiens GN=CDCP1 PE=1 SV=3	2637	YJC_160818_PC9mem_AALmnp_G_01.10865.10865.2	controllerType=0 controllerNumber=1 scan=10865	69.8094
12559:6	29	R.LSLVLVPAQKLQQ[+0.984]HTHEKPC[+57.021]N[+2059.735]TSFSYLVASAIPSQDLYFGSFC[+57.021]PGGSIK.Q	HexNAc(4)Hex(5)Fuc(1)NeuAc(1)	C[+57]*2, N[+2060], Q[+1]	1247.58	6	7480.47	7481.46	-1	1.3	457	Specific	463.67	6.08	6.08	0.52	34	>sp|Q9H5V8|CDCP1_HUMAN CUB domain-containing protein 1 OS=Homo sapiens GN=CDCP1 PE=1 SV=3	2637	YJC_160818_PC9mem_AALmnp_G_01.10864.10864.2	controllerType=0 controllerNumber=1 scan=10864	69.8024
11828:4	29	K.LQQHTHEKPC[+57.021]N[+1913.677]TSFSYLVASAIPSQDLYFGSFC[+57.021]PGGSIK.Q	HexNAc(4)Hex(5)Fuc(0)NeuAc(1)	C[+57]*2, N[+1914]	1572.45	4	6286.76	6285.76	1	0.6	467	Specific	338.15	309.63	11.57	4.55	34	>sp|Q9H5V8|CDCP1_HUMAN CUB domain-containing protein 1 OS=Homo sapiens GN=CDCP1 PE=1 SV=3	2637	YJC_160818_PC9mem_AALmnp_G_01.10225.10225.4	controllerType=0 controllerNumber=1 scan=10225	65.8414
11906:4	29	K.LQQHTHEKPC[+57.021]N[+1872.651]TSFSYLVASAIPSQDLYFGSFC[+57.021]PGGSIK.Q	HexNAc(3)Hex(6)NeuAc(1)	C[+57]*2, N[+1873]	1562.19	4	6245.74	6244.73	1	1	467	Specific	348.94	348.94	89.53	5.1	34	>sp|Q9H5V8|CDCP1_HUMAN CUB domain-containing protein 1 OS=Homo sapiens GN=CDCP1 PE=1 SV=3	2637	YJC_160818_PC9mem_AALmnp_G_01.10281.10281.4	controllerType=0 controllerNumber=1 scan=10281	66.1536
11792:5	29	K.LQQHTHEKPC[+57.021]N[+2205.793]TSFSYLVASAIPSQDLYFGSFC[+57.021]PGGSIK.Q	HexNAc(4)Hex(5)Fuc(2)NeuAc(1)	C[+57]*2, N[+2206]	1316.58	5	6578.89	6577.87	1	2.2	467	Specific	375.66	351.92	13.78	4.9	34	>sp|Q9H5V8|CDCP1_HUMAN CUB domain-containing protein 1 OS=Homo sapiens GN=CDCP1 PE=1 SV=3	2637	YJC_160818_PC9mem_AALmnp_G_01.10195.10195.5	controllerType=0 controllerNumber=1 scan=10195	65.6684
11799:6	29	K.LQQHTHEKPC[+57.021]N[+2059.735]TSFSYLVASAIPSQDLYFGSFC[+57.021]PGGSIK.Q	HexNAc(4)Hex(5)Fuc(1)NeuAc(1)	C[+57]*2, N[+2060]	1072.8	6	6431.76	6431.81	0	-8.7	467	Specific	402.23	298.51	29.32	3.84	34	>sp|Q9H5V8|CDCP1_HUMAN CUB domain-containing protein 1 OS=Homo sapiens GN=CDCP1 PE=1 SV=3	2637	YJC_160818_PC9mem_AALmnp_G_01.10202.10202.3	controllerType=0 controllerNumber=1 scan=10202	65.7027
12268:6	29	K.LQQHTHEKPC[+57.021]N[+2204.772]TSFSYLVASAIPSQDLYFGSFC[+57.021]PGGSIK.Q	HexNAc(4)Hex(5)Fuc(0)NeuAc(2)	C[+57]*2, N[+2205]	1096.99	6	6576.89	6576.85	0	5.5	467	Specific	420.29	318.67	2.8	4.05	34	>sp|Q9H5V8|CDCP1_HUMAN CUB domain-containing protein 1 OS=Homo sapiens GN=CDCP1 PE=1 SV=3	2637	YJC_160818_PC9mem_AALmnp_G_01.10597.10597.3	controllerType=0 controllerNumber=1 scan=10597	68.0999
11957:5	29	K.LQQHTHEKPC[+57.021]N[+1549.565]TSFSYLVASAIPSQDLYFGSFC[+57.021]PGGSIK.Q	HexNAc(3)Hex(4)Fuc(2)	C[+57]*2, N[+1550]	1184.93	5	5920.63	5921.65	-1	-1.3	467	Specific	438.53	391.51	7.31	5.65	34	>sp|Q9H5V8|CDCP1_HUMAN CUB domain-containing protein 1 OS=Homo sapiens GN=CDCP1 PE=1 SV=3	2637	YJC_160818_PC9mem_AALmnp_G_01.10330.10330.5	controllerType=0 controllerNumber=1 scan=10330	66.4754
11827:4	29	K.LQQHTHEKPC[+57.021]N[+1913.677]TSFSYLVASAIPSQDLYFGSFC[+57.021]PGGSIK.Q	HexNAc(4)Hex(5)Fuc(0)NeuAc(1)	C[+57]*2, N[+1914]	1572.45	4	6286.76	6285.76	1	0.6	467	Specific	453.36	64.07	35.44	1.79	34	>sp|Q9H5V8|CDCP1_HUMAN CUB domain-containing protein 1 OS=Homo sapiens GN=CDCP1 PE=1 SV=3	2637	YJC_160818_PC9mem_AALmnp_G_01.10224.10224.4	controllerType=0 controllerNumber=1 scan=10224	65.8354
11900:5	29	K.LQQHTHEKPC[+57.021]N[+2060.755]TSFSYLVASAIPSQDLYFGSFC[+57.021]PGGSIK.Q	HexNAc(4)Hex(5)Fuc(3)	C[+57]*2, N[+2061]	1287.57	5	6433.8	6432.84	1	-5.3	467	Specific	504.36	402.52	42.44	6.65	34	>sp|Q9H5V8|CDCP1_HUMAN CUB domain-containing protein 1 OS=Homo sapiens GN=CDCP1 PE=1 SV=3	2637	YJC_160818_PC9mem_AALmnp_G_01.10275.10275.5	controllerType=0 controllerNumber=1 scan=10275	66.1101
11893:5	29	K.LQQHTHEKPC[+57.021]N[+1768.640]TSFSYLVASAIPSQDLYFGSFC[+57.021]PGGSIK.Q	HexNAc(4)Hex(5)Fuc(1)	C[+57]*2, N[+1769]	1228.95	5	6140.7	6140.72	0	-2.5	467	Specific	515.2	36.33	36.33	1.95	34	>sp|Q9H5V8|CDCP1_HUMAN CUB domain-containing protein 1 OS=Homo sapiens GN=CDCP1 PE=1 SV=3	2637	YJC_160818_PC9mem_AALmnp_G_01.10272.10272.5	controllerType=0 controllerNumber=1 scan=10272	66.0977
11899:5	29	K.LQQHTHEKPC[+57.021]N[+2059.735]TSFSYLVASAIPSQDLYFGSFC[+57.021]PGGSIK.Q	HexNAc(4)Hex(5)Fuc(1)NeuAc(1)	C[+57]*2, N[+2060]	1287.17	5	6431.81	6431.81	0	-1.2	467	Specific	532.48	433.82	24.98	7.21	34	>sp|Q9H5V8|CDCP1_HUMAN CUB domain-containing protein 1 OS=Homo sapiens GN=CDCP1 PE=1 SV=3	2637	YJC_160818_PC9mem_AALmnp_G_01.10275.10275.5	controllerType=0 controllerNumber=1 scan=10275	66.1101
12255:4	29	K.LQQHTHEKPC[+57.021]N[+2205.793]TSFSYLVASAIPSQDLYFGSFC[+57.021]PGGSIK.Q	HexNAc(4)Hex(5)Fuc(2)NeuAc(1)	C[+57]*2, N[+2206]	1645.23	4	6577.88	6577.87	0	1	467	Specific	532.8	405.98	5.2	6.82	34	>sp|Q9H5V8|CDCP1_HUMAN CUB domain-containing protein 1 OS=Homo sapiens GN=CDCP1 PE=1 SV=3	2637	YJC_160818_PC9mem_AALmnp_G_01.10588.10588.2	controllerType=0 controllerNumber=1 scan=10588	68.053
11800:6	29	K.LQQHTHEKPC[+57.021]N[+2060.755]TSFSYLVASAIPSQ[+0.984]DLYFGSFC[+57.021]PGGSIK.Q	HexNAc(4)Hex(5)Fuc(3)	C[+57]*2, N[+2061], Q[+1]	1073.31	6	6434.82	6433.82	1	-0.1	467	Specific	386.73	268.27	22.71	3.92	34	>sp|Q9H5V8|CDCP1_HUMAN CUB domain-containing protein 1 OS=Homo sapiens GN=CDCP1 PE=1 SV=3	2637	YJC_160818_PC9mem_AALmnp_G_01.10202.10202.3	controllerType=0 controllerNumber=1 scan=10202	65.7027
11895:5	29	K.LQ[+0.984]QHTHEKPC[+57.021]N[+1768.640]TSFSYLVASAIPSQDLYFGSFC[+57.021]PGGSIK.Q	HexNAc(4)Hex(5)Fuc(1)	C[+57]*2, N[+1769], Q[+1]	1228.95	5	6140.7	6141.7	-1	0.6	467	Specific	440.76	373.95	0	4.94	34	>sp|Q9H5V8|CDCP1_HUMAN CUB domain-containing protein 1 OS=Homo sapiens GN=CDCP1 PE=1 SV=3	2637	YJC_160818_PC9mem_AALmnp_G_01.10273.10273.5	controllerType=0 controllerNumber=1 scan=10273	66.1036
04571:10	29	K.DN[+1751.624]DSHVYAVIEDTMVYGHLLQDSSGSFLQPEVDTYRPFQGTMGVC[+57.021]PPSPPTIC[+57.021]SRAPTAK.L	HexNAc(4)Hex(4)NeuAc(1)	C[+57]*2, N[+1752]	839.777	10	8388.71	8390.72	-2	-1.4	728	Specific	367.37	11.2	11.2	0.36	34	>sp|Q9H5V8|CDCP1_HUMAN CUB domain-containing protein 1 OS=Homo sapiens GN=CDCP1 PE=1 SV=3	2637	YJC_160818_PC9mem_AALmnp_G_01.4476.4476.10	controllerType=0 controllerNumber=1 scan=4476	31.8363
22130:3	30	-.MVDLTQVMDDEVFMAFASYATIILSKMMLMSTATAFYR.L			1448.36	3	4343.08	4342.07	1	0.7	1	NRagged	505.02	483.78	107.82	7.07	5	>sp|P10620|MGST1_HUMAN Microsomal glutathione S-transferase 1 OS=Homo sapiens GN=MGST1 PE=1 SV=1	10311	YJC_160818_PC9mem_AALmnp_G_01.19503.19503.3	controllerType=0 controllerNumber=1 scan=19503	125.808
22128:3	30	-.MVDLTQVMDDEVFMAFASYATIILSKMMLMSTATAFYR.L			1448.36	3	4343.08	4342.07	1	0.7	1	NRagged	859.47	433.4	211.98	14.18	5	>sp|P10620|MGST1_HUMAN Microsomal glutathione S-transferase 1 OS=Homo sapiens GN=MGST1 PE=1 SV=1	10311	YJC_160818_PC9mem_AALmnp_G_01.19502.19502.3	controllerType=0 controllerNumber=1 scan=19502	125.805
20835:3	30	M.VDLTQVMDDEVFMAFASYATIILSK.M			936.468	3	2807.39	2807.39	0	0.5	2	NRagged	288.58	100.41	100.41	1.7	5	>sp|P10620|MGST1_HUMAN Microsomal glutathione S-transferase 1 OS=Homo sapiens GN=MGST1 PE=1 SV=1	10311	YJC_160818_PC9mem_AALmnp_G_01.18429.18429.3	controllerType=0 controllerNumber=1 scan=18429	118.625
20837:3	30	M.VDLTQVMDDEVFMAFASYATIILSK.M			936.468	3	2807.39	2807.39	0	0.5	2	NRagged	537.2	481.34	481.34	6.85	5	>sp|P10620|MGST1_HUMAN Microsomal glutathione S-transferase 1 OS=Homo sapiens GN=MGST1 PE=1 SV=1	10311	YJC_160818_PC9mem_AALmnp_G_01.18430.18430.3	controllerType=0 controllerNumber=1 scan=18430	118.633
20157:3	30	M.VDLTQVMDDEVFM[+15.995]AFASYATIILSK.M		M[+16]	941.795	3	2823.37	2823.38	0	-4.7	2	NRagged	424.52	218.94	99.69	3.49	5	>sp|P10620|MGST1_HUMAN Microsomal glutathione S-transferase 1 OS=Homo sapiens GN=MGST1 PE=1 SV=1	10311	YJC_160818_PC9mem_AALmnp_G_01.17835.17835.3	controllerType=0 controllerNumber=1 scan=17835	114.51
20159:3	30	M.VDLTQVMDDEVFM[+15.995]AFASYATIILSK.M		M[+16]	941.795	3	2823.37	2823.38	0	-4.7	2	NRagged	507.22	507.22	72.85	6.68	5	>sp|P10620|MGST1_HUMAN Microsomal glutathione S-transferase 1 OS=Homo sapiens GN=MGST1 PE=1 SV=1	10311	YJC_160818_PC9mem_AALmnp_G_01.17836.17836.3	controllerType=0 controllerNumber=1 scan=17836	114.514
22103:3	30	M.VDLTQVMDDEVFMAFASYATIILSKMMLMSTATAFYR.L			1404.35	3	4211.02	4211.03	0	-0.8	2	NRagged	590.43	533	188.16	8.64	5	>sp|P10620|MGST1_HUMAN Microsomal glutathione S-transferase 1 OS=Homo sapiens GN=MGST1 PE=1 SV=1	10311	YJC_160818_PC9mem_AALmnp_G_01.19486.19486.3	controllerType=0 controllerNumber=1 scan=19486	125.73
22101:3	30	M.VDLTQVMDDEVFMAFASYATIILSKMMLMSTATAFYR.L			1404.35	3	4211.02	4211.03	0	-0.8	2	NRagged	956.73	596.38	190.86	16.64	5	>sp|P10620|MGST1_HUMAN Microsomal glutathione S-transferase 1 OS=Homo sapiens GN=MGST1 PE=1 SV=1	10311	YJC_160818_PC9mem_AALmnp_G_01.19485.19485.3	controllerType=0 controllerNumber=1 scan=19485	125.724
19565:4	30	R.AHLNDLENIIPFLGIGLLYSLSGPDPSTAILHFRLFVGARIYHTIAYLTPLPQPNR.A			1557.1	4	6225.37	6225.38	0	-1.8	75	Specific	170.43	170.43	26.58	3.05	5	>sp|P10620|MGST1_HUMAN Microsomal glutathione S-transferase 1 OS=Homo sapiens GN=MGST1 PE=1 SV=1	10311	YJC_160818_PC9mem_AALmnp_G_01.17298.17298.2	controllerType=0 controllerNumber=1 scan=17298	110.819
19517:5	30	R.AHLNDLENIIPFLGIGLLYSLSGPDPSTAILHFRLFVGARIYHTIAYLTPLPQPNR.A			1245.88	5	6225.36	6225.38	0	-3.5	75	Specific	496.85	139.87	139.87	2.96	5	>sp|P10620|MGST1_HUMAN Microsomal glutathione S-transferase 1 OS=Homo sapiens GN=MGST1 PE=1 SV=1	10311	YJC_160818_PC9mem_AALmnp_G_01.17263.17263.5	controllerType=0 controllerNumber=1 scan=17263	110.608
19563:4	30	R.AHLNDLENIIPFLGIGLLYSLSGPDPSTAILHFRLFVGARIYHTIAYLTPLPQPNR.A			1557.1	4	6225.37	6225.38	0	-1.8	75	Specific	580.08	310.97	81.81	6.23	5	>sp|P10620|MGST1_HUMAN Microsomal glutathione S-transferase 1 OS=Homo sapiens GN=MGST1 PE=1 SV=1	10311	YJC_160818_PC9mem_AALmnp_G_01.17297.17297.2	controllerType=0 controllerNumber=1 scan=17297	110.811
19519:5	30	R.AHLNDLENIIPFLGIGLLYSLSGPDPSTAILHFRLFVGARIYHTIAYLTPLPQPNR.A			1245.88	5	6225.36	6225.38	0	-3.5	75	Specific	635.56	635.56	209.34	8.94	5	>sp|P10620|MGST1_HUMAN Microsomal glutathione S-transferase 1 OS=Homo sapiens GN=MGST1 PE=1 SV=1	10311	YJC_160818_PC9mem_AALmnp_G_01.17264.17264.5	controllerType=0 controllerNumber=1 scan=17264	110.614
19536:7	30	R.AHLNDLENIIPFLGIGLLYSLSGPDPSTAILHFRLFVGARIYHTIAYLTPLPQPNR.A			890.203	7	6225.38	6225.38	0	-0.1	75	Specific	854.81	854.81	142	14.45	5	>sp|P10620|MGST1_HUMAN Microsomal glutathione S-transferase 1 OS=Homo sapiens GN=MGST1 PE=1 SV=1	10311	YJC_160818_PC9mem_AALmnp_G_01.17275.17275.7	controllerType=0 controllerNumber=1 scan=17275	110.675
19516:6	30	R.AHLNDLENIIPFLGIGLLYSLSGPDPSTAILHFRLFVGARIYHTIAYLTPLPQPNR.A			1038.57	6	6226.41	6225.38	1	4.7	75	Specific	1041.54	1021.59	323.48	16.89	5	>sp|P10620|MGST1_HUMAN Microsomal glutathione S-transferase 1 OS=Homo sapiens GN=MGST1 PE=1 SV=1	10311	YJC_160818_PC9mem_AALmnp_G_01.17261.17261.6	controllerType=0 controllerNumber=1 scan=17261	110.593
12609:2	31	K.SALTVQFVQGIFVEK.Y			833.462	2	1665.92	1665.92	0	-2.3	17	Specific	385.03	240.38	240.38	4.57	7	>sp|P62834|RAP1A_HUMAN Ras-related protein Rap-1A OS=Homo sapiens GN=RAP1A PE=1 SV=1	14105	YJC_160818_PC9mem_AALmnp_G_01.10902.10902.2	controllerType=0 controllerNumber=1 scan=10902	70.0308
12607:2	31	K.SALTVQFVQGIFVEK.Y			833.462	2	1665.92	1665.92	0	-2.3	17	Specific	543.67	363.47	363.47	7.05	7	>sp|P62834|RAP1A_HUMAN Ras-related protein Rap-1A OS=Homo sapiens GN=RAP1A PE=1 SV=1	14105	YJC_160818_PC9mem_AALmnp_G_01.10901.10901.2	controllerType=0 controllerNumber=1 scan=10901	70.0274
12085:3	31	K.SALTVQFVQGIFVEKYDPTIEDSYRK.Q			1011.85	3	3033.55	3033.56	0	-2.2	17	Specific	881.9	631.28	631.28	14.66	7	>sp|P62834|RAP1A_HUMAN Ras-related protein Rap-1A OS=Homo sapiens GN=RAP1A PE=1 SV=1	14105	YJC_160818_PC9mem_AALmnp_G_01.10436.10436.3	controllerType=0 controllerNumber=1 scan=10436	67.133
12086:3	31	K.SALTVQFVQGIFVEKYDPTIEDSYRK.Q			1011.85	3	3033.55	3033.56	0	-2.2	17	Specific	884.61	860.58	860.58	14.66	7	>sp|P62834|RAP1A_HUMAN Ras-related protein Rap-1A OS=Homo sapiens GN=RAP1A PE=1 SV=1	14105	YJC_160818_PC9mem_AALmnp_G_01.10437.10437.3	controllerType=0 controllerNumber=1 scan=10437	67.1388
12515:3	31	R.KQVEVDC[+57.021]QQC[+57.021]MLEILDTAGTEQFTAMR.D		C[+57]*2	1067.83	3	3201.48	3201.47	0	2.7	42	Specific	668.37	393.28	393.28	9.87	7	>sp|P62834|RAP1A_HUMAN Ras-related protein Rap-1A OS=Homo sapiens GN=RAP1A PE=1 SV=1	14105	YJC_160818_PC9mem_AALmnp_G_01.10817.10817.3	controllerType=0 controllerNumber=1 scan=10817	69.4859
12516:3	31	R.KQVEVDC[+57.021]QQC[+57.021]MLEILDTAGTEQFTAMR.D		C[+57]*2	1067.83	3	3201.48	3201.47	0	2.7	42	Specific	693.86	568.67	568.67	10.53	7	>sp|P62834|RAP1A_HUMAN Ras-related protein Rap-1A OS=Homo sapiens GN=RAP1A PE=1 SV=1	14105	YJC_160818_PC9mem_AALmnp_G_01.10818.10818.3	controllerType=0 controllerNumber=1 scan=10818	69.4924
16722:4	31	R.DLYMKNGQGFALVYSITAQSTFNDLQDLREQILR.V			987.745	4	3947.96	3948	0	-9.5	69	Specific	620.92	544.13	544.13	8.95	7	>sp|P62834|RAP1A_HUMAN Ras-related protein Rap-1A OS=Homo sapiens GN=RAP1A PE=1 SV=1	14105	YJC_160818_PC9mem_AALmnp_G_01.14754.14754.4	controllerType=0 controllerNumber=1 scan=14754	93.9903
16844:3	31	R.DLYMKN[+0.984]GQGFALVYSITAQSTFNDLQDLREQILR.V		N[+1]	1317	3	3948.97	3948.98	0	-1.5	69	Specific	906.48	829.66	81.77	15.29	7	>sp|P62834|RAP1A_HUMAN Ras-related protein Rap-1A OS=Homo sapiens GN=RAP1A PE=1 SV=1	14105	YJC_160818_PC9mem_AALmnp_G_01.14866.14866.3	controllerType=0 controllerNumber=1 scan=14866	94.7131
16843:3	31	R.DLYMKN[+0.984]GQGFALVYSITAQSTFNDLQDLREQILR.V		N[+1]	1317	3	3948.97	3948.98	0	-1.5	69	Specific	920.93	555.28	116.16	15.29	7	>sp|P62834|RAP1A_HUMAN Ras-related protein Rap-1A OS=Homo sapiens GN=RAP1A PE=1 SV=1	14105	YJC_160818_PC9mem_AALmnp_G_01.14865.14865.3	controllerType=0 controllerNumber=1 scan=14865	94.7047
17367:3	31	K.N[+0.984]GQGFALVYSITAQSTFNDLQDLREQILR.V		N[+1]	1100.23	3	3298.67	3298.67	0	0.9	74	Specific	675.55	450.38	0	10.27	7	>sp|P62834|RAP1A_HUMAN Ras-related protein Rap-1A OS=Homo sapiens GN=RAP1A PE=1 SV=1	14105	YJC_160818_PC9mem_AALmnp_G_01.15323.15323.3	controllerType=0 controllerNumber=1 scan=15323	97.6722
16831:3	31	K.NGQ[+0.984]GFALVYSITAQSTFNDLQDLREQILR.V		Q[+1]	1100.23	3	3298.68	3298.67	0	1.6	74	Specific	728.87	391.94	0	11.11	7	>sp|P62834|RAP1A_HUMAN Ras-related protein Rap-1A OS=Homo sapiens GN=RAP1A PE=1 SV=1	14105	YJC_160818_PC9mem_AALmnp_G_01.14855.14855.3	controllerType=0 controllerNumber=1 scan=14855	94.6446
16833:3	31	K.NGQ[+0.984]GFALVYSITAQSTFNDLQDLREQILR.V		Q[+1]	1100.23	3	3298.68	3298.67	0	1.6	74	Specific	816.1	763.54	0.69	13.48	7	>sp|P62834|RAP1A_HUMAN Ras-related protein Rap-1A OS=Homo sapiens GN=RAP1A PE=1 SV=1	14105	YJC_160818_PC9mem_AALmnp_G_01.14856.14856.3	controllerType=0 controllerNumber=1 scan=14856	94.6481
17369:3	31	K.N[+0.984]GQGFALVYSITAQSTFNDLQDLREQILR.V		N[+1]	1100.23	3	3298.67	3298.67	0	0.9	74	Specific	1044.96	937.52	1.8	17.65	7	>sp|P62834|RAP1A_HUMAN Ras-related protein Rap-1A OS=Homo sapiens GN=RAP1A PE=1 SV=1	14105	YJC_160818_PC9mem_AALmnp_G_01.15324.15324.3	controllerType=0 controllerNumber=1 scan=15324	97.6784
15097:3	32	K.EVVLLDFAAAGGELGWLTHPYGK.G			815.091	3	2443.26	2443.27	0	-2.3	28	Specific	382.59	260.78	260.78	4.77	8	>sp|P29317|EPHA2_HUMAN Ephrin type-A receptor 2 OS=Homo sapiens GN=EPHA2 PE=1 SV=2	5341	YJC_160818_PC9mem_AALmnp_G_01.13193.13193.3	controllerType=0 controllerNumber=1 scan=13193	84.0938
15099:3	32	K.EVVLLDFAAAGGELGWLTHPYGK.G			815.091	3	2443.26	2443.27	0	-2.3	28	Specific	786.95	705.19	705.19	12.96	8	>sp|P29317|EPHA2_HUMAN Ephrin type-A receptor 2 OS=Homo sapiens GN=EPHA2 PE=1 SV=2	5341	YJC_160818_PC9mem_AALmnp_G_01.13194.13194.3	controllerType=0 controllerNumber=1 scan=13194	84.0999
10348:3	32	K.ETFNLYYAESDLDYGTNFQKR.L			858.73	3	2574.18	2574.18	0	-1	117	Specific	791.42	756.28	756.28	12.87	8	>sp|P29317|EPHA2_HUMAN Ephrin type-A receptor 2 OS=Homo sapiens GN=EPHA2 PE=1 SV=2	5341	YJC_160818_PC9mem_AALmnp_G_01.8991.8991.3	controllerType=0 controllerNumber=1 scan=8991	58.8737
09822:3	32	R.TSVTVSDLEPHMN[+2205.793]YTFTVEAR.N	HexNAc(4)Hex(5)Fuc(2)NeuAc(1)	N[+2206]	1535.31	3	4603.92	4602.93	1	-2.5	395	Specific	169.02	72.5	26.44	3.49	8	>sp|P29317|EPHA2_HUMAN Ephrin type-A receptor 2 OS=Homo sapiens GN=EPHA2 PE=1 SV=2	5341	YJC_160818_PC9mem_AALmnp_G_01.8549.8549.3	controllerType=0 controllerNumber=1 scan=8549	56.1438
09284:3	32	R.TSVTVSDLEPHMN[+1914.697]YTFTVEAR.N	HexNAc(4)Hex(5)Fuc(2)	N[+1915]	1437.96	3	4311.87	4311.84	0	7.5	395	Specific	471.86	341.16	341.16	5.77	8	>sp|P29317|EPHA2_HUMAN Ephrin type-A receptor 2 OS=Homo sapiens GN=EPHA2 PE=1 SV=2	5341	YJC_160818_PC9mem_AALmnp_G_01.8114.8114.3	controllerType=0 controllerNumber=1 scan=8114	53.5583
02986:3	32	R.TASVSIN[+1914.697]QTEPPKVR.L	HexNAc(4)Hex(5)Fuc(2)	N[+1915]	1181.19	3	3541.56	3541.58	0	-6.3	429	Specific	197.93	0.16	0.16	1.03	8	>sp|P29317|EPHA2_HUMAN Ephrin type-A receptor 2 OS=Homo sapiens GN=EPHA2 PE=1 SV=2	5341	YJC_160818_PC9mem_AALmnp_G_01.3219.3219.3	controllerType=0 controllerNumber=1 scan=3219	24.5116
03360:3	32	R.TASVSIN[+2205.793]QTEPPKVR.L	HexNAc(4)Hex(5)Fuc(2)NeuAc(1)	N[+2206]	1278.23	3	3832.67	3832.67	0	-2.2	429	Specific	288.62	52.06	52.06	3.75	8	>sp|P29317|EPHA2_HUMAN Ephrin type-A receptor 2 OS=Homo sapiens GN=EPHA2 PE=1 SV=2	5341	YJC_160818_PC9mem_AALmnp_G_01.3509.3509.3	controllerType=0 controllerNumber=1 scan=3509	26.1888
16951:4	32	R.KFTSASDVWSFGIVMWEVMTYGERPYWELSNHEVMK.A			1085.76	4	4340.02	4340.03	0	-2.6	793	Specific	866.84	512.52	332.3	14.5	8	>sp|P29317|EPHA2_HUMAN Ephrin type-A receptor 2 OS=Homo sapiens GN=EPHA2 PE=1 SV=2	5341	YJC_160818_PC9mem_AALmnp_G_01.14949.14949.4	controllerType=0 controllerNumber=1 scan=14949	95.2468
16953:4	32	R.KFTSASDVWSFGIVMWEVMTYGERPYWELSNHEVMK.A			1085.76	4	4340.02	4340.03	0	-2.6	793	Specific	898.94	835.59	338.43	14.5	8	>sp|P29317|EPHA2_HUMAN Ephrin type-A receptor 2 OS=Homo sapiens GN=EPHA2 PE=1 SV=2	5341	YJC_160818_PC9mem_AALmnp_G_01.14950.14950.4	controllerType=0 controllerNumber=1 scan=14950	95.2531
13171:3	32	R.TVSEWLESIKMQQYTEHFMAAGYTAIEK.V			1097.86	3	3291.57	3291.57	0	-1.2	908	Specific	781.35	469.15	469.15	12.14	8	>sp|P29317|EPHA2_HUMAN Ephrin type-A receptor 2 OS=Homo sapiens GN=EPHA2 PE=1 SV=2	5341	YJC_160818_PC9mem_AALmnp_G_01.11399.11399.3	controllerType=0 controllerNumber=1 scan=11399	73.1157
13173:3	32	R.TVSEWLESIKMQQYTEHFMAAGYTAIEK.V			1097.86	3	3291.57	3291.57	0	-1.2	908	Specific	798.69	669.3	669.3	12.52	8	>sp|P29317|EPHA2_HUMAN Ephrin type-A receptor 2 OS=Homo sapiens GN=EPHA2 PE=1 SV=2	5341	YJC_160818_PC9mem_AALmnp_G_01.11400.11400.3	controllerType=0 controllerNumber=1 scan=11400	73.1224
20333:4	33	M.PEEVHHGEEEVETFAFQAEIAQLMSLIINTFYSNK.E			1013.49	4	4050.94	4050.94	0	-0.4	2	NRagged	609.36	351.77	40.9	8.02	5	>sp|P08238|HS90B_HUMAN Heat shock protein HSP 90-beta OS=Homo sapiens GN=HSP90AB1 PE=1 SV=4	7699	YJC_160818_PC9mem_AALmnp_G_01.17984.17984.4	controllerType=0 controllerNumber=1 scan=17984	115.556
20335:4	33	M.PEEVHHGEEEVETFAFQAEIAQLMSLIINTFYSNK.E			1013.49	4	4050.94	4050.94	0	-0.4	2	NRagged	890.3	890.3	166.49	14.6	5	>sp|P08238|HS90B_HUMAN Heat shock protein HSP 90-beta OS=Homo sapiens GN=HSP90AB1 PE=1 SV=4	7699	YJC_160818_PC9mem_AALmnp_G_01.17985.17985.4	controllerType=0 controllerNumber=1 scan=17985	115.563
20606:5	33	M.PEEVHHGEEEVETFAFQ[+0.984]AEIAQLMSLIINTFYSNKEIFLR.E		Q[+1]	943.073	5	4711.33	4710.31	1	5.1	2	NRagged	483.24	483.24	7.12	6.64	5	>sp|P08238|HS90B_HUMAN Heat shock protein HSP 90-beta OS=Homo sapiens GN=HSP90AB1 PE=1 SV=4	7699	YJC_160818_PC9mem_AALmnp_G_01.18235.18235.4	controllerType=0 controllerNumber=1 scan=18235	117.284
12723:3	33	R.TLTLVDTGIGMTKADLINNLGTIAK.S			858.473	3	2573.4	2573.42	0	-6.8	83	Specific	814.84	588.06	588.06	13.4	5	>sp|P08238|HS90B_HUMAN Heat shock protein HSP 90-beta OS=Homo sapiens GN=HSP90AB1 PE=1 SV=4	7699	YJC_160818_PC9mem_AALmnp_G_01.11005.11005.3	controllerType=0 controllerNumber=1 scan=11005	70.666
12725:3	33	R.TLTLVDTGIGMTKADLINNLGTIAK.S			858.473	3	2573.4	2573.42	0	-6.8	83	Specific	862.61	760.03	760.03	14.4	5	>sp|P08238|HS90B_HUMAN Heat shock protein HSP 90-beta OS=Homo sapiens GN=HSP90AB1 PE=1 SV=4	7699	YJC_160818_PC9mem_AALmnp_G_01.11006.11006.3	controllerType=0 controllerNumber=1 scan=11006	70.6686
07507:3	33	K.SIYYITGESKEQVANSAFVER.V			797.73	3	2391.18	2391.18	0	-2.9	482	Specific	304.27	161.97	161.97	3.68	5	>sp|P08238|HS90B_HUMAN Heat shock protein HSP 90-beta OS=Homo sapiens GN=HSP90AB1 PE=1 SV=4	7699	YJC_160818_PC9mem_AALmnp_G_01.6715.6715.7	controllerType=0 controllerNumber=1 scan=6715	45.4064
07509:3	33	K.SIYYITGESKEQVANSAFVER.V			797.73	3	2391.18	2391.18	0	-2.9	482	Specific	468.53	421.15	421.15	6.84	5	>sp|P08238|HS90B_HUMAN Heat shock protein HSP 90-beta OS=Homo sapiens GN=HSP90AB1 PE=1 SV=4	7699	YJC_160818_PC9mem_AALmnp_G_01.6716.6716.7	controllerType=0 controllerNumber=1 scan=6716	45.409
18245:4	33	K.AVKDLVVLLFETALLSSGFSLEDPQTHSNR.I			822.438	4	3286.73	3286.73	0	-0.1	650	Specific	606.64	450.13	450.13	9.36	5	>sp|P08238|HS90B_HUMAN Heat shock protein HSP 90-beta OS=Homo sapiens GN=HSP90AB1 PE=1 SV=4	7699	YJC_160818_PC9mem_AALmnp_G_01.16121.16121.4	controllerType=0 controllerNumber=1 scan=16121	102.904
18247:4	33	K.AVKDLVVLLFETALLSSGFSLEDPQTHSNR.I			822.438	4	3286.73	3286.73	0	-0.1	650	Specific	1074.88	1074.88	1074.88	18.73	5	>sp|P08238|HS90B_HUMAN Heat shock protein HSP 90-beta OS=Homo sapiens GN=HSP90AB1 PE=1 SV=4	7699	YJC_160818_PC9mem_AALmnp_G_01.16122.16122.4	controllerType=0 controllerNumber=1 scan=16122	102.91
05972:3	34	K.TC[+57.021]DWLPKPN[+1038.375]MSASC[+57.021]K.E	HexNAc(2)Hex(3)Fuc(1)	C[+57]*2, N[+1038]	945.06	3	2833.16	2833.17	0	-2.6	93	Specific	771.77	515.85	515.85	12.82	5	>sp|P07602|SAP_HUMAN Prosaposin OS=Homo sapiens GN=PSAP PE=1 SV=2	15384	YJC_160818_PC9mem_AALmnp_G_01.5535.5535.3	controllerType=0 controllerNumber=1 scan=5535	38.2759
15383:4	34	K.TC[+57.021]DWLPKPN[+1038.375]MSASC[+57.021]KEIVDSYLPVILDIIK.G	HexNAc(2)Hex(3)Fuc(1)	C[+57]*2, N[+1038]	1136.8	4	4544.16	4544.15	0	2	93	Specific	378.36	27	27	0.85	5	>sp|P07602|SAP_HUMAN Prosaposin OS=Homo sapiens GN=PSAP PE=1 SV=2	15384	YJC_160818_PC9mem_AALmnp_G_01.13468.13468.4	controllerType=0 controllerNumber=1 scan=13468	85.7763
15412:4	34	K.TC[+57.021]DWLPKPN[+876.322]MSASC[+57.021]KEIVDSYLPVILDIIK.G	HexNAc(2)Hex(2)Fuc(1)	C[+57]*2, N[+876]	1096.03	4	4381.1	4382.1	-1	1	93	Specific	423.61	32.68	32.68	0.82	5	>sp|P07602|SAP_HUMAN Prosaposin OS=Homo sapiens GN=PSAP PE=1 SV=2	15384	YJC_160818_PC9mem_AALmnp_G_01.13506.13506.4	controllerType=0 controllerNumber=1 scan=13506	86.0289
15384:4	34	K.TC[+57.021]DWLPKPN[+1038.375]MSASC[+57.021]KEIVDSYLPVILDIIK.G	HexNAc(2)Hex(3)Fuc(1)	C[+57]*2, N[+1038]	1136.8	4	4544.16	4544.15	0	2	93	Specific	867.68	576.57	576.57	14.48	5	>sp|P07602|SAP_HUMAN Prosaposin OS=Homo sapiens GN=PSAP PE=1 SV=2	15384	YJC_160818_PC9mem_AALmnp_G_01.13469.13469.4	controllerType=0 controllerNumber=1 scan=13469	85.7821
15414:4	34	K.TC[+57.021]DWLPKPN[+876.322]MSASC[+57.021]KEIVDSYLPVILDIIK.G	HexNAc(2)Hex(2)Fuc(1)	C[+57]*2, N[+876]	1096.03	4	4381.1	4382.1	-1	1	93	Specific	874.77	570.64	570.64	14.21	5	>sp|P07602|SAP_HUMAN Prosaposin OS=Homo sapiens GN=PSAP PE=1 SV=2	15384	YJC_160818_PC9mem_AALmnp_G_01.13507.13507.4	controllerType=0 controllerNumber=1 scan=13507	86.0351
09686:3	34	R.TN[+876.322]STFVQALVEHVKEEC[+57.021]DR.L	HexNAc(2)Hex(2)Fuc(1)	C[+57], N[+876]	1046.81	3	3138.41	3138.4	0	0.3	214	Specific	694.66	496.54	496.54	10.48	5	>sp|P07602|SAP_HUMAN Prosaposin OS=Homo sapiens GN=PSAP PE=1 SV=2	15384	YJC_160818_PC9mem_AALmnp_G_01.8436.8436.3	controllerType=0 controllerNumber=1 scan=8436	55.4834
23024:5	34	R.TN[+1038.375]STFVQALVEHVKEEC[+57.021]DRLGPGMADIC[+57.021]K.N	HexNAc(2)Hex(3)Fuc(1)	C[+57]*2, N[+1038]	869.399	5	4342.97	4342.95	0	4	214	Specific	359.16	82.44	82.44	3.43	5	>sp|P07602|SAP_HUMAN Prosaposin OS=Homo sapiens GN=PSAP PE=1 SV=2	15384	YJC_160818_PC9mem_AALmnp_G_01.21319.21319.5	controllerType=0 controllerNumber=1 scan=21319	145.127
11903:4	34	R.TN[+1038.375]STFVQALVEHVKEEC[+57.021]DRLGPGMADIC[+57.021]K.N	HexNAc(2)Hex(3)Fuc(1)	C[+57]*2, N[+1038]	1086.49	4	4342.94	4342.95	0	-3	214	Specific	706.44	357.89	217.4	10.56	5	>sp|P07602|SAP_HUMAN Prosaposin OS=Homo sapiens GN=PSAP PE=1 SV=2	15384	YJC_160818_PC9mem_AALmnp_G_01.10278.10278.4	controllerType=0 controllerNumber=1 scan=10278	66.1326
15518:4	35	R.AKDFSLILDDVAITELSFSREYTAAVEAK.Q			801.417	4	3202.64	3202.65	0	-2.3	172	Specific	640.19	469.12	469.12	9.83	6	>sp|Q99623|PHB2_HUMAN Prohibitin-2 OS=Homo sapiens GN=PHB2 PE=1 SV=2	12955	YJC_160818_PC9mem_AALmnp_G_01.13608.13608.4	controllerType=0 controllerNumber=1 scan=13608	86.6966
15520:4	35	R.AKDFSLILDDVAITELSFSREYTAAVEAK.Q			801.417	4	3202.64	3202.65	0	-2.3	172	Specific	998.26	885.87	885.87	16.83	6	>sp|Q99623|PHB2_HUMAN Prohibitin-2 OS=Homo sapiens GN=PHB2 PE=1 SV=2	12955	YJC_160818_PC9mem_AALmnp_G_01.13609.13609.4	controllerType=0 controllerNumber=1 scan=13609	86.7027
13081:4	35	R.AAQNISKTIATSQNRIYLTADNLVLN[+0.984]LQDESFTR.G		N[+1]	953.25	4	3809.98	3809.97	0	3.2	256	Specific	305.9	99.82	18.67	1.49	6	>sp|Q99623|PHB2_HUMAN Prohibitin-2 OS=Homo sapiens GN=PHB2 PE=1 SV=2	12955	YJC_160818_PC9mem_AALmnp_G_01.11310.11310.4	controllerType=0 controllerNumber=1 scan=11310	72.5361
13083:4	35	R.AAQNISKTIATSQNRIYLTADN[+0.984]LVLNLQDESFTR.G		N[+1]	953.25	4	3809.98	3809.97	0	3.2	256	Specific	595.56	515.9	44.91	8.27	6	>sp|Q99623|PHB2_HUMAN Prohibitin-2 OS=Homo sapiens GN=PHB2 PE=1 SV=2	12955	YJC_160818_PC9mem_AALmnp_G_01.11311.11311.4	controllerType=0 controllerNumber=1 scan=11311	72.5424
12875:3	35	K.TIATSQNRIYLTADNLVLNLQDESFTR.G			1032.87	3	3096.6	3096.6	0	0.8	263	Specific	444.03	208.03	208.03	3.81	6	>sp|Q99623|PHB2_HUMAN Prohibitin-2 OS=Homo sapiens GN=PHB2 PE=1 SV=2	12955	YJC_160818_PC9mem_AALmnp_G_01.11120.11120.3	controllerType=0 controllerNumber=1 scan=11120	71.3367
12877:3	35	K.TIATSQNRIYLTADNLVLNLQDESFTR.G			1032.87	3	3096.6	3096.6	0	0.8	263	Specific	731.42	633.17	633.17	11.65	6	>sp|Q99623|PHB2_HUMAN Prohibitin-2 OS=Homo sapiens GN=PHB2 PE=1 SV=2	12955	YJC_160818_PC9mem_AALmnp_G_01.11121.11121.3	controllerType=0 controllerNumber=1 scan=11121	71.3395
12921:2	35	R.IYLTADNLVLNLQDESFTR.G			1113.08	2	2225.15	2225.14	0	0.2	271	Specific	596.97	460.53	460.53	8.7	6	>sp|Q99623|PHB2_HUMAN Prohibitin-2 OS=Homo sapiens GN=PHB2 PE=1 SV=2	12955	YJC_160818_PC9mem_AALmnp_G_01.11156.11156.2	controllerType=0 controllerNumber=1 scan=11156	71.5431
12922:2	35	R.IYLTADNLVLNLQDESFTR.G			1113.08	2	2225.15	2225.14	0	0.2	271	Specific	622.98	489.34	489.34	9.7	6	>sp|Q99623|PHB2_HUMAN Prohibitin-2 OS=Homo sapiens GN=PHB2 PE=1 SV=2	12955	YJC_160818_PC9mem_AALmnp_G_01.11157.11157.2	controllerType=0 controllerNumber=1 scan=11157	71.5497
12948:3	35	R.IYLTADNLVLNLQDESFTRGSDSLIK.G			975.848	3	2925.53	2925.52	0	3.4	271	Specific	677.45	486.66	486.66	10.22	6	>sp|Q99623|PHB2_HUMAN Prohibitin-2 OS=Homo sapiens GN=PHB2 PE=1 SV=2	12955	YJC_160818_PC9mem_AALmnp_G_01.11184.11184.3	controllerType=0 controllerNumber=1 scan=11184	71.7349
12950:3	35	R.IYLTADNLVLNLQDESFTRGSDSLIK.G			975.848	3	2925.53	2925.52	0	3.4	271	Specific	803.77	726.34	726.34	13.6	6	>sp|Q99623|PHB2_HUMAN Prohibitin-2 OS=Homo sapiens GN=PHB2 PE=1 SV=2	12955	YJC_160818_PC9mem_AALmnp_G_01.11185.11185.3	controllerType=0 controllerNumber=1 scan=11185	71.7414
12853:6	36	-.MREC[+57.021]ISIHVGQAGVQIGNAC[+57.021]WELYC[+57.021]LEHGIQPDGQMPSDKTIGGGDDSFNTFFSETGAGK.H		C[+57]*3	1096.17	6	6571.97	6572.97	-1	-0.2	1	NRagged	584.59	584.59	584.59	8.42	6	>sp|Q9BQE3|TBA1C_HUMAN Tubulin alpha-1C chain OS=Homo sapiens GN=TUBA1C PE=1 SV=1	17073	YJC_160818_PC9mem_AALmnp_G_01.11105.11105.6	controllerType=0 controllerNumber=1 scan=11105	71.2469
12851:6	36	-.MREC[+57.021]ISIHVGQAGVQIGNAC[+57.021]WELYC[+57.021]LEHGIQPDGQMPSDKTIGGGDDSFNTFFSETGAGK.H		C[+57]*3	1096.17	6	6571.97	6572.97	-1	-0.2	1	NRagged	595.17	137.84	137.84	5.52	6	>sp|Q9BQE3|TBA1C_HUMAN Tubulin alpha-1C chain OS=Homo sapiens GN=TUBA1C PE=1 SV=1	17073	YJC_160818_PC9mem_AALmnp_G_01.11104.11104.6	controllerType=0 controllerNumber=1 scan=11104	71.241
14062:4	36	R.KLADQC[+57.021]TGLQGFLVFHSFGGGTGSGFTSLLMER.L		C[+57]	880.431	4	3518.7	3518.72	0	-4.4	124	Specific	306.66	95.09	95.09	1.69	6	>sp|Q9BQE3|TBA1C_HUMAN Tubulin alpha-1C chain OS=Homo sapiens GN=TUBA1C PE=1 SV=1	17073	YJC_160818_PC9mem_AALmnp_G_01.12175.12175.4	controllerType=0 controllerNumber=1 scan=12175	77.8149
14064:4	36	R.KLADQC[+57.021]TGLQGFLVFHSFGGGTGSGFTSLLMER.L		C[+57]	880.431	4	3518.7	3518.72	0	-4.4	124	Specific	765.62	683.11	683.11	12.46	6	>sp|Q9BQE3|TBA1C_HUMAN Tubulin alpha-1C chain OS=Homo sapiens GN=TUBA1C PE=1 SV=1	17073	YJC_160818_PC9mem_AALmnp_G_01.12176.12176.4	controllerType=0 controllerNumber=1 scan=12176	77.8176
12810:5	36	K.SKLEFSIYPAPQVSTAVVEPYNSILTTHTTLEHSDC[+57.021]AFMVDNEAIYDIC[+57.021]RR.N		C[+57]*2	1178.57	5	5888.8	5888.82	0	-4.8	165	Specific	655.09	251.78	31.1	7.8	6	>sp|Q9BQE3|TBA1C_HUMAN Tubulin alpha-1C chain OS=Homo sapiens GN=TUBA1C PE=1 SV=1	17073	YJC_160818_PC9mem_AALmnp_G_01.11071.11071.5	controllerType=0 controllerNumber=1 scan=11071	71.044
12812:5	36	K.SKLEFSIYPAPQVSTAVVEPYNSILTTHTTLEHSDC[+57.021]AFMVDNEAIYDIC[+57.021]RR.N		C[+57]*2	1178.57	5	5888.8	5888.82	0	-4.8	165	Specific	1073.52	1059.49	131.78	18.02	6	>sp|Q9BQE3|TBA1C_HUMAN Tubulin alpha-1C chain OS=Homo sapiens GN=TUBA1C PE=1 SV=1	17073	YJC_160818_PC9mem_AALmnp_G_01.11072.11072.5	controllerType=0 controllerNumber=1 scan=11072	71.0466
20091:6	36	R.NLDIERPTYTNLNRLISQIVSSITASLRFDGALNVDLTEFQTNLVPYPR.I			930.494	6	5577.93	5577.93	0	-1.5	216	Specific	370.81	320.36	51.59	4.77	6	>sp|Q9BQE3|TBA1C_HUMAN Tubulin alpha-1C chain OS=Homo sapiens GN=TUBA1C PE=1 SV=1	17073	YJC_160818_PC9mem_AALmnp_G_01.17777.17777.6	controllerType=0 controllerNumber=1 scan=17777	114.108
13333:3	36	R.FDGALNVDLTEFQTNLVPYPR.I			803.736	3	2409.19	2409.21	0	-6.5	244	Specific	513.15	425.27	425.27	5.93	6	>sp|Q9BQE3|TBA1C_HUMAN Tubulin alpha-1C chain OS=Homo sapiens GN=TUBA1C PE=1 SV=1	17073	YJC_160818_PC9mem_AALmnp_G_01.11532.11532.3	controllerType=0 controllerNumber=1 scan=11532	73.9204
13605:4	36	R.AFVHWYVGEGMEEGEFSEAREDMAALEKDYEEVGADSADGEDEGEEY.-			1319.79	4	5276.16	5277.15	-1	1.2	403	CRagged	499.88	183.67	183.67	3.37	6	>sp|Q9BQE3|TBA1C_HUMAN Tubulin alpha-1C chain OS=Homo sapiens GN=TUBA1C PE=1 SV=1	17073	YJC_160818_PC9mem_AALmnp_G_01.11778.11778.4	controllerType=0 controllerNumber=1 scan=11778	75.442
13607:4	36	R.AFVHWYVGEGMEEGEFSEAREDMAALEKDYEEVGADSADGEDEGEEY.-			1319.79	4	5276.16	5277.15	-1	1.2	403	CRagged	686.44	616.61	616.61	9.97	6	>sp|Q9BQE3|TBA1C_HUMAN Tubulin alpha-1C chain OS=Homo sapiens GN=TUBA1C PE=1 SV=1	17073	YJC_160818_PC9mem_AALmnp_G_01.11779.11779.4	controllerType=0 controllerNumber=1 scan=11779	75.4445
20611:3	37	R.SIIQVYLTTGVITGLGLALNFQPSLIMLNRYFSK.R			1257.7	3	3771.1	3771.09	0	1.5	110	Specific	803.78	783.22	783.22	13.33	4	>sp|O15427|MOT4_HUMAN Monocarboxylate transporter 4 OS=Homo sapiens GN=SLC16A3 PE=1 SV=1	10521	YJC_160818_PC9mem_AALmnp_G_01.18240.18240.3	controllerType=0 controllerNumber=1 scan=18240	117.312
20609:3	37	R.SIIQVYLTTGVITGLGLALNFQPSLIMLNRYFSK.R			1257.7	3	3771.1	3771.09	0	1.5	110	Specific	1105.12	902.91	902.91	19.33	4	>sp|O15427|MOT4_HUMAN Monocarboxylate transporter 4 OS=Homo sapiens GN=SLC16A3 PE=1 SV=1	10521	YJC_160818_PC9mem_AALmnp_G_01.18239.18239.3	controllerType=0 controllerNumber=1 scan=18239	117.308
22010:4	37	R.LLDLSVFRDRGFVLYAVAASVMVLGLFVPPVFVVSYAK.D			1040.33	4	4158.32	4158.32	0	-1.8	217	Specific	391.52	132.32	132.32	2.98	4	>sp|O15427|MOT4_HUMAN Monocarboxylate transporter 4 OS=Homo sapiens GN=SLC16A3 PE=1 SV=1	10521	YJC_160818_PC9mem_AALmnp_G_01.19423.19423.4	controllerType=0 controllerNumber=1 scan=19423	125.36
22012:4	37	R.LLDLSVFRDRGFVLYAVAASVMVLGLFVPPVFVVSYAK.D			1040.33	4	4158.32	4158.32	0	-1.8	217	Specific	695.98	682.24	682.24	10.61	4	>sp|O15427|MOT4_HUMAN Monocarboxylate transporter 4 OS=Homo sapiens GN=SLC16A3 PE=1 SV=1	10521	YJC_160818_PC9mem_AALmnp_G_01.19424.19424.4	controllerType=0 controllerNumber=1 scan=19424	125.367
21918:4	37	K.DLGVPDTKAAFLLTILGFIDIFARPAAGFVAGLGK.V			894.51	4	3575.02	3575	0	4	255	Specific	474.54	386.43	386.43	6.27	4	>sp|O15427|MOT4_HUMAN Monocarboxylate transporter 4 OS=Homo sapiens GN=SLC16A3 PE=1 SV=1	10521	YJC_160818_PC9mem_AALmnp_G_01.19357.19357.4	controllerType=0 controllerNumber=1 scan=19357	125.001
21920:4	37	K.DLGVPDTKAAFLLTILGFIDIFARPAAGFVAGLGK.V			894.51	4	3575.02	3575	0	4	255	Specific	1098.93	1077.25	1077.25	18.4	4	>sp|O15427|MOT4_HUMAN Monocarboxylate transporter 4 OS=Homo sapiens GN=SLC16A3 PE=1 SV=1	10521	YJC_160818_PC9mem_AALmnp_G_01.19358.19358.4	controllerType=0 controllerNumber=1 scan=19358	125.008
21978:3	37	K.AAFLLTILGFIDIFARPAAGFVAGLGK.V			917.194	3	2749.57	2749.58	0	-4.3	263	Specific	657.67	594.46	594.46	10.61	4	>sp|O15427|MOT4_HUMAN Monocarboxylate transporter 4 OS=Homo sapiens GN=SLC16A3 PE=1 SV=1	10521	YJC_160818_PC9mem_AALmnp_G_01.19402.19402.3	controllerType=0 controllerNumber=1 scan=19402	125.238
21977:3	37	K.AAFLLTILGFIDIFARPAAGFVAGLGK.V			917.194	3	2749.57	2749.58	0	-4.3	263	Specific	776.18	690.98	690.98	12.61	4	>sp|O15427|MOT4_HUMAN Monocarboxylate transporter 4 OS=Homo sapiens GN=SLC16A3 PE=1 SV=1	10521	YJC_160818_PC9mem_AALmnp_G_01.19401.19401.3	controllerType=0 controllerNumber=1 scan=19401	125.234
18805:5	38	R.C[+57.021]PPLPTTSVIIVFHNEAWSTLLRTVHSVLYSSPAILLK.E		C[+57]	852.87	5	4260.32	4260.33	0	-1.4	181	Specific	410.04	221.97	5.77	4.13	7	>sp|Q14435|GALT3_HUMAN Polypeptide N-acetylgalactosaminyltransferase 3 OS=Homo sapiens GN=GALNT3 PE=1 SV=2	6506	YJC_160818_PC9mem_AALmnp_G_01.16621.16621.5	controllerType=0 controllerNumber=1 scan=16621	106.232
18806:5	38	R.C[+57.021]PPLPTTSVIIVFHNEAWSTLLRTVHSVLYSSPAILLK.E		C[+57]	852.87	5	4260.32	4260.33	0	-1.4	181	Specific	796.82	746.32	83.08	12.68	7	>sp|Q14435|GALT3_HUMAN Polypeptide N-acetylgalactosaminyltransferase 3 OS=Homo sapiens GN=GALNT3 PE=1 SV=2	6506	YJC_160818_PC9mem_AALmnp_G_01.16622.16622.5	controllerType=0 controllerNumber=1 scan=16622	106.238
17127:3	38	R.LLGATVATAETLTFLDAHC[+57.021]EC[+57.021]FYGWLEPLLAR.I		C[+57]*2	1213.61	3	3638.81	3638.8	0	2.9	262	Specific	958.87	887.8	887.8	16.38	7	>sp|Q14435|GALT3_HUMAN Polypeptide N-acetylgalactosaminyltransferase 3 OS=Homo sapiens GN=GALNT3 PE=1 SV=2	6506	YJC_160818_PC9mem_AALmnp_G_01.15110.15110.3	controllerType=0 controllerNumber=1 scan=15110	96.2966
17125:3	38	R.LLGATVATAETLTFLDAHC[+57.021]EC[+57.021]FYGWLEPLLAR.I		C[+57]*2	1213.61	3	3638.81	3638.8	0	2.9	262	Specific	1056.61	750.58	750.58	18.38	7	>sp|Q14435|GALT3_HUMAN Polypeptide N-acetylgalactosaminyltransferase 3 OS=Homo sapiens GN=GALNT3 PE=1 SV=2	6506	YJC_160818_PC9mem_AALmnp_G_01.15109.15109.3	controllerType=0 controllerNumber=1 scan=15109	96.2889
11522:4	38	R.IAEN[+2204.772]YTAVVSPDIASIDLNTFEFNKPSPYGSNHNR.G	HexNAc(4)Hex(5)Fuc(0)NeuAc(2)	N[+2205]	1522.42	4	6086.66	6085.65	1	1.6	294	Specific	349.58	275.62	2.02	4.86	7	>sp|Q14435|GALT3_HUMAN Polypeptide N-acetylgalactosaminyltransferase 3 OS=Homo sapiens GN=GALNT3 PE=1 SV=2	6506	YJC_160818_PC9mem_AALmnp_G_01.9945.9945.4	controllerType=0 controllerNumber=1 scan=9945	64.1375
11543:5	38	R.IAEN[+2205.793]YTAVVSPDIASIDLNTFEFNKPSPYGSNHNR.G	HexNAc(4)Hex(5)Fuc(2)NeuAc(1)	N[+2206]	1218.34	5	6087.66	6086.67	1	-1.9	294	Specific	410.44	286.42	38.6	5.01	7	>sp|Q14435|GALT3_HUMAN Polypeptide N-acetylgalactosaminyltransferase 3 OS=Homo sapiens GN=GALNT3 PE=1 SV=2	6506	YJC_160818_PC9mem_AALmnp_G_01.9960.9960.5	controllerType=0 controllerNumber=1 scan=9960	64.2174
10272:10	38	R.LQ[+0.984]C[+57.021]KN[+1095.397]FTWYLNNIYPEVYVPDLNPVISGYIKSVGQPLC[+57.021]LDVGENNQGGKPLIMYTC[+57.021]HGLGGNQYFEYSAQHEIR.H	HexNAc(3)Hex(3)	C[+57]*3, N[+1095], Q[+1]	968.359	10	9674.53	9675.53	-1	0.3	480	Specific	560.38	15.15	15.15	3.09	7	>sp|Q14435|GALT3_HUMAN Polypeptide N-acetylgalactosaminyltransferase 3 OS=Homo sapiens GN=GALNT3 PE=1 SV=2	6506	YJC_160818_PC9mem_AALmnp_G_01.8920.8920.5	controllerType=0 controllerNumber=1 scan=8920	58.4036
10271:5	38	K.SVGQPLC[+57.021]LDVGENNQGGKPLIMYTC[+57.021]HGLGGNQYFEYSAQHEIR.H		C[+57]*2	968.257	5	4837.26	4837.26	0	0.1	511	Specific	759.32	745.87	124.22	12.47	7	>sp|Q14435|GALT3_HUMAN Polypeptide N-acetylgalactosaminyltransferase 3 OS=Homo sapiens GN=GALNT3 PE=1 SV=2	6506	YJC_160818_PC9mem_AALmnp_G_01.8920.8920.5	controllerType=0 controllerNumber=1 scan=8920	58.4036
13351:3	38	K.TVVTGEQIWEIQKDQLLYNPFLK.M			921.498	3	2762.48	2762.48	0	0.8	581	Specific	504.06	316.48	316.48	5.32	7	>sp|Q14435|GALT3_HUMAN Polypeptide N-acetylgalactosaminyltransferase 3 OS=Homo sapiens GN=GALNT3 PE=1 SV=2	6506	YJC_160818_PC9mem_AALmnp_G_01.11547.11547.3	controllerType=0 controllerNumber=1 scan=11547	74.0202
13353:3	38	K.TVVTGEQIWEIQKDQLLYNPFLK.M			921.498	3	2762.48	2762.48	0	0.8	581	Specific	730.53	631.67	631.67	11.75	7	>sp|Q14435|GALT3_HUMAN Polypeptide N-acetylgalactosaminyltransferase 3 OS=Homo sapiens GN=GALNT3 PE=1 SV=2	6506	YJC_160818_PC9mem_AALmnp_G_01.11548.11548.3	controllerType=0 controllerNumber=1 scan=11548	74.0229
12535:5	39	K.NQAADDDDEDLNDTNYDEFN[+0.984]GYAGSLFSSGPYEKDDEEADAIYAALDKR.M		N[+1]	1091.46	5	5453.27	5453.28	0	-1.1	63	Specific	473.89	27.19	20.53	0.98	3	>sp|O94906|PRP6_HUMAN Pre-mRNA-processing factor 6 OS=Homo sapiens GN=PRPF6 PE=1 SV=1	13645	YJC_160818_PC9mem_AALmnp_G_01.10840.10840.5	controllerType=0 controllerNumber=1 scan=10840	69.6404
12536:5	39	K.NQAADDDDEDLNDTNYDEFN[+0.984]GYAGSLFSSGPYEKDDEEADAIYAALDKR.M		N[+1]	1091.46	5	5453.27	5453.28	0	-1.1	63	Specific	1362.22	1149.99	6.47	24	3	>sp|O94906|PRP6_HUMAN Pre-mRNA-processing factor 6 OS=Homo sapiens GN=PRPF6 PE=1 SV=1	13645	YJC_160818_PC9mem_AALmnp_G_01.10841.10841.5	controllerType=0 controllerNumber=1 scan=10841	69.6466
13237:4	39	R.AVEC[+57.021]C[+57.021]PTSVELWLALARLETYENARK.V		C[+57]*2	770.637	4	3079.53	3079.53	0	-2.8	426	Specific	819.97	741.4	741.4	13.93	3	>sp|O94906|PRP6_HUMAN Pre-mRNA-processing factor 6 OS=Homo sapiens GN=PRPF6 PE=1 SV=1	13645	YJC_160818_PC9mem_AALmnp_G_01.11452.11452.4	controllerType=0 controllerNumber=1 scan=11452	73.4476
13623:4	39	K.IDSDLGDAWAFFYKFELQHGTEEQQEEVR.K			872.655	4	3487.6	3487.61	0	-2.2	870	Specific	372.1	170.14	170.14	3.6	3	>sp|O94906|PRP6_HUMAN Pre-mRNA-processing factor 6 OS=Homo sapiens GN=PRPF6 PE=1 SV=1	13645	YJC_160818_PC9mem_AALmnp_G_01.11792.11792.4	controllerType=0 controllerNumber=1 scan=11792	75.5233
13625:4	39	K.IDSDLGDAWAFFYKFELQHGTEEQQEEVR.K			872.655	4	3487.6	3487.61	0	-2.2	870	Specific	977.66	947.51	947.51	16.9	3	>sp|O94906|PRP6_HUMAN Pre-mRNA-processing factor 6 OS=Homo sapiens GN=PRPF6 PE=1 SV=1	13645	YJC_160818_PC9mem_AALmnp_G_01.11793.11793.4	controllerType=0 controllerNumber=1 scan=11793	75.5294
11557:4	40	M.GLEDEQKMLTESGDPEEEEEEEEELVDPLTTVREQC[+57.021]EQLEK.C		C[+57]	1213.29	4	4850.15	4849.16	1	-2.1	2	NRagged	1018.74	684.63	162.15	17.61	3	>sp|P07919|QCR6_HUMAN Cytochrome b-c1 complex subunit 6, mitochondrial OS=Homo sapiens GN=UQCRH PE=1 SV=2	13956	YJC_160818_PC9mem_AALmnp_G_01.9975.9975.4	controllerType=0 controllerNumber=1 scan=9975	64.309
11558:4	40	M.GLEDEQKMLTESGDPEEEEEEEEELVDPLTTVREQC[+57.021]EQLEK.C		C[+57]	1213.29	4	4850.15	4849.16	1	-2.1	2	NRagged	1225.26	1121.48	314.85	21.61	3	>sp|P07919|QCR6_HUMAN Cytochrome b-c1 complex subunit 6, mitochondrial OS=Homo sapiens GN=UQCRH PE=1 SV=2	13956	YJC_160818_PC9mem_AALmnp_G_01.9976.9976.4	controllerType=0 controllerNumber=1 scan=9976	64.3154
11263:3	40	K.MLTESGDPEEEEEEEEELVDPLTTVR.E			1002.44	3	3005.32	3005.33	0	-3.6	9	Specific	599.35	503.72	503.72	8.32	3	>sp|P07919|QCR6_HUMAN Cytochrome b-c1 complex subunit 6, mitochondrial OS=Homo sapiens GN=UQCRH PE=1 SV=2	13956	YJC_160818_PC9mem_AALmnp_G_01.9750.9750.3	controllerType=0 controllerNumber=1 scan=9750	63.1802
11261:3	40	K.MLTESGDPEEEEEEEEELVDPLTTVR.E			1002.44	3	3005.32	3005.33	0	-3.6	9	Specific	644.8	439.86	439.86	8.7	3	>sp|P07919|QCR6_HUMAN Cytochrome b-c1 complex subunit 6, mitochondrial OS=Homo sapiens GN=UQCRH PE=1 SV=2	13956	YJC_160818_PC9mem_AALmnp_G_01.9749.9749.3	controllerType=0 controllerNumber=1 scan=9749	63.1777
11282:3	40	K.MLTESGDPEEEEEEEEELVDPLTTVREQC[+57.021]EQLEK.C		C[+57]	1350.6	3	4049.78	4049.78	0	-2.2	9	Specific	1056.6	688.07	110.12	18.75	3	>sp|P07919|QCR6_HUMAN Cytochrome b-c1 complex subunit 6, mitochondrial OS=Homo sapiens GN=UQCRH PE=1 SV=2	13956	YJC_160818_PC9mem_AALmnp_G_01.9765.9765.3	controllerType=0 controllerNumber=1 scan=9765	63.259
11284:3	40	K.MLTESGDPEEEEEEEEELVDPLTTVREQC[+57.021]EQLEK.C		C[+57]	1350.6	3	4049.78	4049.78	0	-2.2	9	Specific	1220.33	1023.73	632.95	21.75	3	>sp|P07919|QCR6_HUMAN Cytochrome b-c1 complex subunit 6, mitochondrial OS=Homo sapiens GN=UQCRH PE=1 SV=2	13956	YJC_160818_PC9mem_AALmnp_G_01.9766.9766.3	controllerType=0 controllerNumber=1 scan=9766	63.262
21939:5	41	M.PAHSLVMSSPALPAFLLC[+57.021]STLLVIKMYVVAIITGQVRLR.K		C[+57]	853.885	5	4265.4	4265.41	0	-3.4	2	NRagged	374.55	282.93	37.59	4.36	4	>sp|O14684|PTGES_HUMAN Prostaglandin E synthase OS=Homo sapiens GN=PTGES PE=1 SV=2	13821	YJC_160818_PC9mem_AALmnp_G_01.19373.19373.5	controllerType=0 controllerNumber=1 scan=19373	125.078
21940:5	41	M.PAHSLVMSSPALPAFLLC[+57.021]STLLVIKMYVVAIITGQVRLR.K		C[+57]	853.885	5	4265.4	4265.41	0	-3.4	2	NRagged	1129.55	1129.55	438.03	19.52	4	>sp|O14684|PTGES_HUMAN Prostaglandin E synthase OS=Homo sapiens GN=PTGES PE=1 SV=2	13821	YJC_160818_PC9mem_AALmnp_G_01.19374.19374.5	controllerType=0 controllerNumber=1 scan=19374	125.08
21888:5	41	M.PAHSLVM[+15.995]SSPALPAFLLC[+57.021]STLLVIKMYVVAIITGQVRLR.K		C[+57], M[+16]	857.088	5	4281.41	4281.41	0	2	2	NRagged	249.2	84.54	54.67	1.49	4	>sp|O14684|PTGES_HUMAN Prostaglandin E synthase OS=Homo sapiens GN=PTGES PE=1 SV=2	13821	YJC_160818_PC9mem_AALmnp_G_01.19333.19333.5	controllerType=0 controllerNumber=1 scan=19333	124.844
21890:5	41	M.PAHSLVM[+15.995]SSPALPAFLLC[+57.021]STLLVIKMYVVAIITGQVRLR.K		C[+57], M[+16]	857.088	5	4281.41	4281.41	0	2	2	NRagged	972.95	972.95	519.34	16.19	4	>sp|O14684|PTGES_HUMAN Prostaglandin E synthase OS=Homo sapiens GN=PTGES PE=1 SV=2	13821	YJC_160818_PC9mem_AALmnp_G_01.19334.19334.5	controllerType=0 controllerNumber=1 scan=19334	124.851
17247:3	41	R.SVTYTLAQLPC[+57.021]ASMALQILWEAAR.H		C[+57]	898.465	3	2693.38	2693.38	0	0.2	127	Specific	313.45	183.75	183.75	3.01	4	>sp|O14684|PTGES_HUMAN Prostaglandin E synthase OS=Homo sapiens GN=PTGES PE=1 SV=2	13821	YJC_160818_PC9mem_AALmnp_G_01.15218.15218.3	controllerType=0 controllerNumber=1 scan=15218	97.025
17278:2	41	R.SVTYTLAQLPC[+57.021]ASMALQILWEAAR.H		C[+57]	1347.19	2	2693.38	2693.38	0	0.6	127	Specific	540.4	449.9	449.9	7.73	4	>sp|O14684|PTGES_HUMAN Prostaglandin E synthase OS=Homo sapiens GN=PTGES PE=1 SV=2	13821	YJC_160818_PC9mem_AALmnp_G_01.15243.15243.2	controllerType=0 controllerNumber=1 scan=15243	97.1796
17277:2	41	R.SVTYTLAQLPC[+57.021]ASMALQILWEAAR.H		C[+57]	1347.19	2	2693.38	2693.38	0	0.6	127	Specific	658.67	453.78	453.78	10.71	4	>sp|O14684|PTGES_HUMAN Prostaglandin E synthase OS=Homo sapiens GN=PTGES PE=1 SV=2	13821	YJC_160818_PC9mem_AALmnp_G_01.15242.15242.2	controllerType=0 controllerNumber=1 scan=15242	97.1728
17249:3	41	R.SVTYTLAQLPC[+57.021]ASMALQILWEAAR.H		C[+57]	898.465	3	2693.38	2693.38	0	0.2	127	Specific	792.21	721.36	721.36	12.16	4	>sp|O14684|PTGES_HUMAN Prostaglandin E synthase OS=Homo sapiens GN=PTGES PE=1 SV=2	13821	YJC_160818_PC9mem_AALmnp_G_01.15219.15219.3	controllerType=0 controllerNumber=1 scan=15219	97.0316
19015:3	41	R.SVTYTLAQ[+0.984]LPC[+57.021]ASMALQILWEAARHL.-		C[+57], Q[+1]	982.178	3	2944.52	2944.51	0	4.5	127	CRagged	293.25	17.59	17.59	0.97	4	>sp|O14684|PTGES_HUMAN Prostaglandin E synthase OS=Homo sapiens GN=PTGES PE=1 SV=2	13821	YJC_160818_PC9mem_AALmnp_G_01.16811.16811.3	controllerType=0 controllerNumber=1 scan=16811	107.53
19017:3	41	R.SVTYTLAQ[+0.984]LPC[+57.021]ASMALQILWEAARHL.-		C[+57], Q[+1]	982.178	3	2944.52	2944.51	0	4.5	127	CRagged	491.71	442.6	230.01	6.95	4	>sp|O14684|PTGES_HUMAN Prostaglandin E synthase OS=Homo sapiens GN=PTGES PE=1 SV=2	13821	YJC_160818_PC9mem_AALmnp_G_01.16812.16812.3	controllerType=0 controllerNumber=1 scan=16812	107.537
21831:3	42	R.MLSSPVESVLFYAITTLHNLLLYQEGAK.M			1046.56	3	3137.65	3137.66	0	-1.9	234	Specific	628.73	407.05	407.05	9.11	5	>sp|P14923|PLAK_HUMAN Junction plakoglobin OS=Homo sapiens GN=JUP PE=1 SV=3	13167	YJC_160818_PC9mem_AALmnp_G_01.19291.19291.3	controllerType=0 controllerNumber=1 scan=19291	124.572
21833:3	42	R.MLSSPVESVLFYAITTLHNLLLYQEGAK.M			1046.56	3	3137.65	3137.66	0	-1.9	234	Specific	710.7	694.32	694.32	11.74	5	>sp|P14923|PLAK_HUMAN Junction plakoglobin OS=Homo sapiens GN=JUP PE=1 SV=3	13167	YJC_160818_PC9mem_AALmnp_G_01.19292.19292.3	controllerType=0 controllerNumber=1 scan=19292	124.578
18159:4	42	R.NLSDVATKQEGLESVLKILVNQLSVDDVNVLTC[+57.021]ATGTLSNLTC[+57.021]NNSK.N		C[+57]*2	1269.4	4	5074.59	5075.59	-1	1.1	378	Specific	546.11	189.79	189.79	3.98	5	>sp|P14923|PLAK_HUMAN Junction plakoglobin OS=Homo sapiens GN=JUP PE=1 SV=3	13167	YJC_160818_PC9mem_AALmnp_G_01.16049.16049.4	controllerType=0 controllerNumber=1 scan=16049	102.436
18160:4	42	R.NLSDVATKQEGLESVLKILVNQLSVDDVNVLTC[+57.021]ATGTLSNLTC[+57.021]NNSK.N		C[+57]*2	1269.4	4	5074.59	5075.59	-1	1.1	378	Specific	722.76	709.77	709.77	11.14	5	>sp|P14923|PLAK_HUMAN Junction plakoglobin OS=Homo sapiens GN=JUP PE=1 SV=3	13167	YJC_160818_PC9mem_AALmnp_G_01.16050.16050.4	controllerType=0 controllerNumber=1 scan=16050	102.442
11041:4	42	R.HVAAGTQQPYTDGVRMEEIVEGC[+57.021]TGALHILAR.D		C[+57]	870.683	4	3479.71	3479.72	0	-1.3	541	Specific	429.09	210.63	210.63	3.76	5	>sp|P14923|PLAK_HUMAN Junction plakoglobin OS=Homo sapiens GN=JUP PE=1 SV=3	13167	YJC_160818_PC9mem_AALmnp_G_01.9589.9589.4	controllerType=0 controllerNumber=1 scan=9589	62.3753
11043:4	42	R.HVAAGTQQPYTDGVRMEEIVEGC[+57.021]TGALHILAR.D		C[+57]	870.683	4	3479.71	3479.72	0	-1.3	541	Specific	897.4	757.7	757.7	14.37	5	>sp|P14923|PLAK_HUMAN Junction plakoglobin OS=Homo sapiens GN=JUP PE=1 SV=3	13167	YJC_160818_PC9mem_AALmnp_G_01.9590.9590.4	controllerType=0 controllerNumber=1 scan=9590	62.3816
08938:2	42	R.MEEIVEGC[+57.021]TGALHILAR.D		C[+57]	949.972	2	1898.94	1898.95	0	-4.7	556	Specific	494.31	343.98	343.98	5.8	5	>sp|P14923|PLAK_HUMAN Junction plakoglobin OS=Homo sapiens GN=JUP PE=1 SV=3	13167	YJC_160818_PC9mem_AALmnp_G_01.7839.7839.2	controllerType=0 controllerNumber=1 scan=7839	51.9446
08940:2	42	R.MEEIVEGC[+57.021]TGALHILAR.D		C[+57]	949.972	2	1898.94	1898.95	0	-4.7	556	Specific	549.84	433.07	433.07	7.33	5	>sp|P14923|PLAK_HUMAN Junction plakoglobin OS=Homo sapiens GN=JUP PE=1 SV=3	13167	YJC_160818_PC9mem_AALmnp_G_01.7840.7840.2	controllerType=0 controllerNumber=1 scan=7840	51.9477
18162:2	42	R.LNTIPLFVQLLYSSVENIQR.V			1174.15	2	2347.3	2347.3	0	-2.8	583	Specific	563.05	495.21	495.21	8.03	5	>sp|P14923|PLAK_HUMAN Junction plakoglobin OS=Homo sapiens GN=JUP PE=1 SV=3	13167	YJC_160818_PC9mem_AALmnp_G_01.16052.16052.2	controllerType=0 controllerNumber=1 scan=16052	102.451
18161:2	42	R.LNTIPLFVQLLYSSVENIQR.V			1174.15	2	2347.3	2347.3	0	-2.8	583	Specific	602.39	413.81	413.81	9.95	5	>sp|P14923|PLAK_HUMAN Junction plakoglobin OS=Homo sapiens GN=JUP PE=1 SV=3	13167	YJC_160818_PC9mem_AALmnp_G_01.16051.16051.2	controllerType=0 controllerNumber=1 scan=16051	102.448
17463:4	43	K.FLDYTTDNMSIYPSPTGVLIAIDLAYNLHSAYGNWFPGSKPLIQQAMAK.I			1358.93	4	5432.7	5432.7	0	-0.6	1684	Specific	1213.1	1213.1	60.44	21.53	5	>sp|Q6P2Q9|PRP8_HUMAN Pre-mRNA-processing-splicing factor 8 OS=Homo sapiens GN=PRPF8 PE=1 SV=2	13646	YJC_160818_PC9mem_AALmnp_G_01.15397.15397.4	controllerType=0 controllerNumber=1 scan=15397	98.1213
17461:4	43	K.FLDYTTDNMSIYPSPTGVLIAIDLAYN[+0.984]LHSAYGNWFPGSKPLIQQAMAK.I		N[+1]	1358.93	4	5432.7	5433.68	-1	2.9	1684	Specific	961.14	538.8	50.46	16.1	5	>sp|Q6P2Q9|PRP8_HUMAN Pre-mRNA-processing-splicing factor 8 OS=Homo sapiens GN=PRPF8 PE=1 SV=2	13646	YJC_160818_PC9mem_AALmnp_G_01.15396.15396.4	controllerType=0 controllerNumber=1 scan=15396	98.1185
14335:5	43	K.TFEGNLTTKPINGAIFIFNPRTGQLFLKIIHTSVWAGQK.R			872.679	5	4359.37	4358.38	1	-4.3	1793	Specific	853.61	814.1	46.8	14.1	5	>sp|Q6P2Q9|PRP8_HUMAN Pre-mRNA-processing-splicing factor 8 OS=Homo sapiens GN=PRPF8 PE=1 SV=2	13646	YJC_160818_PC9mem_AALmnp_G_01.12446.12446.5	controllerType=0 controllerNumber=1 scan=12446	79.4586
08197:3	43	R.TNHIYVSSDDIKETGYTYILPK.N			853.096	3	2557.27	2557.28	0	-3.2	2087	Specific	465.43	430.38	430.38	6.88	5	>sp|Q6P2Q9|PRP8_HUMAN Pre-mRNA-processing-splicing factor 8 OS=Homo sapiens GN=PRPF8 PE=1 SV=2	13646	YJC_160818_PC9mem_AALmnp_G_01.7275.7275.3	controllerType=0 controllerNumber=1 scan=7275	48.6981
08195:3	43	R.TNHIYVSSDDIKETGYTYILPK.N			853.096	3	2557.27	2557.28	0	-3.2	2087	Specific	590.88	472.37	472.37	8.64	5	>sp|Q6P2Q9|PRP8_HUMAN Pre-mRNA-processing-splicing factor 8 OS=Homo sapiens GN=PRPF8 PE=1 SV=2	13646	YJC_160818_PC9mem_AALmnp_G_01.7274.7274.3	controllerType=0 controllerNumber=1 scan=7274	48.6891
16387:3	43	R.VQMLLSDRFLGFFMVPAQSSWNYNFMGVR.H			1147.57	3	3440.69	3440.67	0	4.1	2259	Specific	441.31	424.5	424.5	6.73	5	>sp|Q6P2Q9|PRP8_HUMAN Pre-mRNA-processing-splicing factor 8 OS=Homo sapiens GN=PRPF8 PE=1 SV=2	13646	YJC_160818_PC9mem_AALmnp_G_01.14447.14447.3	controllerType=0 controllerNumber=1 scan=14447	92.0539
16385:3	43	R.VQMLLSDRFLGFFMVPAQSSWNYNFMGVR.H			1147.57	3	3440.69	3440.67	0	4.1	2259	Specific	655.27	353.1	353.1	9.12	5	>sp|Q6P2Q9|PRP8_HUMAN Pre-mRNA-processing-splicing factor 8 OS=Homo sapiens GN=PRPF8 PE=1 SV=2	13646	YJC_160818_PC9mem_AALmnp_G_01.14446.14446.3	controllerType=0 controllerNumber=1 scan=14446	92.048
19116:4	44	R.AC[+57.021]AAAGQSGLMALYEAMFTQYSIC[+57.021]AAQILVTNLDFHDEQK.R		C[+57]*2	1110.02	4	4437.07	4437.07	0	0	160	Specific	728.17	402.48	53.45	10.31	6	>sp|P54886|P5CS_HUMAN Delta-1-pyrroline-5-carboxylate synthase OS=Homo sapiens GN=ALDH18A1 PE=1 SV=2	12432	YJC_160818_PC9mem_AALmnp_G_01.16885.16885.4	controllerType=0 controllerNumber=1 scan=16885	108.025
19118:4	44	R.AC[+57.021]AAAGQSGLMALYEAMFTQYSIC[+57.021]AAQILVTNLDFHDEQK.R		C[+57]*2	1110.02	4	4437.07	4437.07	0	0	160	Specific	1056.97	1045.1	115.48	17.94	6	>sp|P54886|P5CS_HUMAN Delta-1-pyrroline-5-carboxylate synthase OS=Homo sapiens GN=ALDH18A1 PE=1 SV=2	12432	YJC_160818_PC9mem_AALmnp_G_01.16886.16886.4	controllerType=0 controllerNumber=1 scan=16886	108.032
17805:5	44	R.AC[+57.021]AAAGQSGLMALYEAMFTQYSIC[+57.021]AAQILVTNLDFHDEQKRR.N		C[+57]*2	950.659	5	4749.27	4749.27	0	0	160	Specific	369.69	47.9	33.7	1.02	6	>sp|P54886|P5CS_HUMAN Delta-1-pyrroline-5-carboxylate synthase OS=Homo sapiens GN=ALDH18A1 PE=1 SV=2	12432	YJC_160818_PC9mem_AALmnp_G_01.15719.15719.5	controllerType=0 controllerNumber=1 scan=15719	100.282
17807:5	44	R.AC[+57.021]AAAGQSGLMALYEAMFTQYSIC[+57.021]AAQILVTNLDFHDEQKRR.N		C[+57]*2	950.659	5	4749.27	4749.27	0	0	160	Specific	1088.11	1001.13	119.56	18.44	6	>sp|P54886|P5CS_HUMAN Delta-1-pyrroline-5-carboxylate synthase OS=Homo sapiens GN=ALDH18A1 PE=1 SV=2	12432	YJC_160818_PC9mem_AALmnp_G_01.15720.15720.5	controllerType=0 controllerNumber=1 scan=15720	100.288
20540:4	44	K.NLELEQVTVPIGVLLVIFESRPDC[+57.021]LPQ[+0.984]VAALAIASGNGLLLK.G		C[+57], Q[+1]	1118.38	4	4470.48	4471.49	-1	-0.4	463	Specific	551.77	355.75	5.99	4.61	6	>sp|P54886|P5CS_HUMAN Delta-1-pyrroline-5-carboxylate synthase OS=Homo sapiens GN=ALDH18A1 PE=1 SV=2	12432	YJC_160818_PC9mem_AALmnp_G_01.18168.18168.2	controllerType=0 controllerNumber=1 scan=18168	116.811
18271:6	44	K.NLELEQVTVPIGVLLVIFESRPDC[+57.021]LPQVAALAIASGNGLLLKGGKEAAHSNR.I		C[+57]	913.672	6	5476.99	5477.99	-1	0.6	463	Specific	706.32	640.56	640.56	11.01	6	>sp|P54886|P5CS_HUMAN Delta-1-pyrroline-5-carboxylate synthase OS=Homo sapiens GN=ALDH18A1 PE=1 SV=2	12432	YJC_160818_PC9mem_AALmnp_G_01.16139.16139.3	controllerType=0 controllerNumber=1 scan=16139	103.009
09195:3	44	K.GIPVMGHSEGIC[+57.021]HMYVDSEASVDK.V		C[+57]	873.396	3	2618.17	2618.17	0	2.1	573	Specific	123.79	6.37	6.37	0.01	6	>sp|P54886|P5CS_HUMAN Delta-1-pyrroline-5-carboxylate synthase OS=Homo sapiens GN=ALDH18A1 PE=1 SV=2	12432	YJC_160818_PC9mem_AALmnp_G_01.8046.8046.3	controllerType=0 controllerNumber=1 scan=8046	53.1611
07169:3	45	K.VIEEFYN[+552.217]QTWVHR.Y	HexNAc(2)Fuc(1)	N[+552]	758.354	3	2273.05	2273.06	0	-6.4	39	Specific	440.96	378.74	378.74	4.98	8	>sp|P11166|GTR1_HUMAN Solute carrier family 2, facilitated glucose transporter member 1 OS=Homo sapiens GN=SLC2A1 PE=1 SV=2	7239	YJC_160818_PC9mem_AALmnp_G_01.6441.6441.3	controllerType=0 controllerNumber=1 scan=6441	43.7649
22394:4	45	R.YGESILPTTLTTLWSLSVAIFSVGGMIGSFSVGLFVNRFGRR.N			1134.61	4	4535.41	4536.41	-1	1.1	52	Specific	374.19	86.9	86.9	0.97	8	>sp|P11166|GTR1_HUMAN Solute carrier family 2, facilitated glucose transporter member 1 OS=Homo sapiens GN=SLC2A1 PE=1 SV=2	7239	YJC_160818_PC9mem_AALmnp_G_01.19701.19701.4	controllerType=0 controllerNumber=1 scan=19701	127.045
22396:4	45	R.YGESILPTTLTTLWSLSVAIFSVGGMIGSFSVGLFVNRFGRR.N			1134.61	4	4535.41	4536.41	-1	1.1	52	Specific	481.61	481.61	481.61	6.33	8	>sp|P11166|GTR1_HUMAN Solute carrier family 2, facilitated glucose transporter member 1 OS=Homo sapiens GN=SLC2A1 PE=1 SV=2	7239	YJC_160818_PC9mem_AALmnp_G_01.19702.19702.4	controllerType=0 controllerNumber=1 scan=19702	127.05
22534:5	45	R.GALGTLHQLGIVVGILIAQVFGLDSIMGNKDLWPLLLSIIFIPALLQC[+57.021]IVLPFC[+57.021]PESPR.F		C[+57]*2	1288.13	5	6436.6	6436.58	0	4.1	154	Specific	433.96	433.96	84.71	6.02	8	>sp|P11166|GTR1_HUMAN Solute carrier family 2, facilitated glucose transporter member 1 OS=Homo sapiens GN=SLC2A1 PE=1 SV=2	7239	YJC_160818_PC9mem_AALmnp_G_01.19865.19865.5	controllerType=0 controllerNumber=1 scan=19865	128.245
22532:5	45	R.GALGTLHQLGIVVGILIAQVFGLDSIMGNKDLWPLLLSIIFIPALLQC[+57.021]IVLPFC[+57.021]PESPR.F		C[+57]*2	1288.13	5	6436.6	6436.58	0	4.1	154	Specific	726.44	276.98	63.57	9.16	8	>sp|P11166|GTR1_HUMAN Solute carrier family 2, facilitated glucose transporter member 1 OS=Homo sapiens GN=SLC2A1 PE=1 SV=2	7239	YJC_160818_PC9mem_AALmnp_G_01.19864.19864.5	controllerType=0 controllerNumber=1 scan=19864	128.237
21627:5	45	R.SPAYRQPILIAVVLQLSQQLSGINAVFYYSTSIFEK.A			809.641	5	4044.18	4044.18	0	-1.6	265	Specific	286.26	286.26	27.45	3.79	8	>sp|P11166|GTR1_HUMAN Solute carrier family 2, facilitated glucose transporter member 1 OS=Homo sapiens GN=SLC2A1 PE=1 SV=2	7239	YJC_160818_PC9mem_AALmnp_G_01.19124.19124.5	controllerType=0 controllerNumber=1 scan=19124	123.458
21625:5	45	R.SPAYRQPILIAVVLQLSQQLSGINAVFYYSTSIFEK.A			809.641	5	4044.18	4044.18	0	-1.6	265	Specific	405.93	209.19	44.14	3.48	8	>sp|P11166|GTR1_HUMAN Solute carrier family 2, facilitated glucose transporter member 1 OS=Homo sapiens GN=SLC2A1 PE=1 SV=2	7239	YJC_160818_PC9mem_AALmnp_G_01.19123.19123.5	controllerType=0 controllerNumber=1 scan=19123	123.453
21570:3	45	R.SPAYRQPILIAVVLQLSQQLSGINAVFYYSTSIFEK.A			1348.73	3	4044.18	4044.18	0	-0.2	265	Specific	531.37	489.55	17.25	7.32	8	>sp|P11166|GTR1_HUMAN Solute carrier family 2, facilitated glucose transporter member 1 OS=Homo sapiens GN=SLC2A1 PE=1 SV=2	7239	YJC_160818_PC9mem_AALmnp_G_01.19085.19085.3	controllerType=0 controllerNumber=1 scan=19085	123.201
21574:4	45	R.SPAYRQPILIAVVLQLSQQLSGINAVFYYSTSIFEK.A			1011.8	4	4044.19	4044.18	0	1.4	265	Specific	596.17	596.17	35.49	7.84	8	>sp|P11166|GTR1_HUMAN Solute carrier family 2, facilitated glucose transporter member 1 OS=Homo sapiens GN=SLC2A1 PE=1 SV=2	7239	YJC_160818_PC9mem_AALmnp_G_01.19087.19087.4	controllerType=0 controllerNumber=1 scan=19087	123.21
21572:4	45	R.SPAYRQPILIAVVLQLSQQLSGINAVFYYSTSIFEK.A			1011.8	4	4044.19	4044.18	0	1.4	265	Specific	613.37	358.87	91.31	7.46	8	>sp|P11166|GTR1_HUMAN Solute carrier family 2, facilitated glucose transporter member 1 OS=Homo sapiens GN=SLC2A1 PE=1 SV=2	7239	YJC_160818_PC9mem_AALmnp_G_01.19086.19086.4	controllerType=0 controllerNumber=1 scan=19086	123.207
21568:3	45	R.SPAYRQPILIAVVLQLSQQLSGINAVFYYSTSIFEK.A			1348.73	3	4044.18	4044.18	0	-0.2	265	Specific	726.84	350.98	72.61	9.9	8	>sp|P11166|GTR1_HUMAN Solute carrier family 2, facilitated glucose transporter member 1 OS=Homo sapiens GN=SLC2A1 PE=1 SV=2	7239	YJC_160818_PC9mem_AALmnp_G_01.19084.19084.3	controllerType=0 controllerNumber=1 scan=19084	123.193
21276:4	45	K.AGVQQPVYATIGSGIVN[+0.984]TAFTVVSLFVVER.A		N[+1]	781.677	4	3123.69	3123.67	0	4.8	301	Specific	257.72	257.72	74.93	3.11	8	>sp|P11166|GTR1_HUMAN Solute carrier family 2, facilitated glucose transporter member 1 OS=Homo sapiens GN=SLC2A1 PE=1 SV=2	7239	YJC_160818_PC9mem_AALmnp_G_01.18830.18830.2	controllerType=0 controllerNumber=1 scan=18830	121.407
21322:3	45	K.AGVQQPVYATIGSGIVN[+0.984]TAFTVVSLFVVER.A		N[+1]	1041.9	3	3123.69	3123.67	0	6	301	Specific	361.66	160.94	64.8	2.09	8	>sp|P11166|GTR1_HUMAN Solute carrier family 2, facilitated glucose transporter member 1 OS=Homo sapiens GN=SLC2A1 PE=1 SV=2	7239	YJC_160818_PC9mem_AALmnp_G_01.18876.18876.3	controllerType=0 controllerNumber=1 scan=18876	121.727
21324:3	45	K.AGVQQPVYATIGSGIVN[+0.984]TAFTVVSLFVVER.A		N[+1]	1041.9	3	3123.69	3123.67	0	6	301	Specific	409.32	409.32	66.72	5.85	8	>sp|P11166|GTR1_HUMAN Solute carrier family 2, facilitated glucose transporter member 1 OS=Homo sapiens GN=SLC2A1 PE=1 SV=2	7239	YJC_160818_PC9mem_AALmnp_G_01.18877.18877.3	controllerType=0 controllerNumber=1 scan=18877	121.736
21274:4	45	K.AGVQQPVYATIGSGIVN[+0.984]TAFTVVSLFVVER.A		N[+1]	781.677	4	3123.69	3123.67	0	4.8	301	Specific	465.26	304.56	171.78	4	8	>sp|P11166|GTR1_HUMAN Solute carrier family 2, facilitated glucose transporter member 1 OS=Homo sapiens GN=SLC2A1 PE=1 SV=2	7239	YJC_160818_PC9mem_AALmnp_G_01.18829.18829.2	controllerType=0 controllerNumber=1 scan=18829	121.402
19775:3	45	K.AGVQQ[+0.984]PVYATIGSGIVNTAFTVVSLFVVERAGR.R		Q[+1]	1136.62	3	3407.86	3407.83	0	8.3	301	Specific	452.88	452.88	36.45	6.25	8	>sp|P11166|GTR1_HUMAN Solute carrier family 2, facilitated glucose transporter member 1 OS=Homo sapiens GN=SLC2A1 PE=1 SV=2	7239	YJC_160818_PC9mem_AALmnp_G_01.17489.17489.3	controllerType=0 controllerNumber=1 scan=17489	112.156
19773:3	45	K.AGVQQPVYATIGSGIVN[+0.984]TAFTVVSLFVVERAGR.R		N[+1]	1136.62	3	3407.86	3407.83	0	8.3	301	Specific	500.97	179.69	179.69	3.7	8	>sp|P11166|GTR1_HUMAN Solute carrier family 2, facilitated glucose transporter member 1 OS=Homo sapiens GN=SLC2A1 PE=1 SV=2	7239	YJC_160818_PC9mem_AALmnp_G_01.17488.17488.3	controllerType=0 controllerNumber=1 scan=17488	112.147
18725:4	45	K.AGVQQPVYATIGSGIVNTAFTVVSLFVVERAGRR.T			891.493	4	3562.95	3562.95	0	0.2	301	Specific	630.55	447.52	447.52	9.42	8	>sp|P11166|GTR1_HUMAN Solute carrier family 2, facilitated glucose transporter member 1 OS=Homo sapiens GN=SLC2A1 PE=1 SV=2	7239	YJC_160818_PC9mem_AALmnp_G_01.16547.16547.4	controllerType=0 controllerNumber=1 scan=16547	105.754
18727:4	45	K.AGVQQPVYATIGSGIVNTAFTVVSLFVVERAGRR.T			891.493	4	3562.95	3562.95	0	0.2	301	Specific	1073.54	1073.54	1073.54	18.42	8	>sp|P11166|GTR1_HUMAN Solute carrier family 2, facilitated glucose transporter member 1 OS=Homo sapiens GN=SLC2A1 PE=1 SV=2	7239	YJC_160818_PC9mem_AALmnp_G_01.16548.16548.4	controllerType=0 controllerNumber=1 scan=16548	105.757
20064:3	46	R.EFREEESLVEQFVFEALVIYMESLALAHADEK.S			1257.95	3	3771.85	3771.85	0	0.9	1088	Specific	289.9	289.9	289.9	4.27	8	>sp|P78527|PRKDC_HUMAN DNA-dependent protein kinase catalytic subunit OS=Homo sapiens GN=PRKDC PE=1 SV=3	13600	YJC_160818_PC9mem_AALmnp_G_01.17746.17746.3	controllerType=0 controllerNumber=1 scan=17746	113.89
20049:4	46	R.EFREEESLVEQFVFEALVIYMESLALAHADEK.S			943.712	4	3771.83	3771.85	0	-4.8	1088	Specific	360.48	171.99	171.99	3.35	8	>sp|P78527|PRKDC_HUMAN DNA-dependent protein kinase catalytic subunit OS=Homo sapiens GN=PRKDC PE=1 SV=3	13600	YJC_160818_PC9mem_AALmnp_G_01.17727.17727.4	controllerType=0 controllerNumber=1 scan=17727	113.754
20063:3	46	R.EFREEESLVEQFVFEALVIYMESLALAHADEK.S			1257.95	3	3771.85	3771.85	0	0.9	1088	Specific	758.85	471.92	471.92	11.62	8	>sp|P78527|PRKDC_HUMAN DNA-dependent protein kinase catalytic subunit OS=Homo sapiens GN=PRKDC PE=1 SV=3	13600	YJC_160818_PC9mem_AALmnp_G_01.17745.17745.3	controllerType=0 controllerNumber=1 scan=17745	113.881
20051:4	46	R.EFREEESLVEQFVFEALVIYMESLALAHADEK.S			943.712	4	3771.83	3771.85	0	-4.8	1088	Specific	930.37	869.74	869.74	15.5	8	>sp|P78527|PRKDC_HUMAN DNA-dependent protein kinase catalytic subunit OS=Homo sapiens GN=PRKDC PE=1 SV=3	13600	YJC_160818_PC9mem_AALmnp_G_01.17728.17728.4	controllerType=0 controllerNumber=1 scan=17728	113.758
14565:2	46	K.AVAFFLESIAMHDIIAAEK.C			1038.55	2	2076.09	2076.08	0	2	1293	Specific	243.98	203.21	203.21	3.51	8	>sp|P78527|PRKDC_HUMAN DNA-dependent protein kinase catalytic subunit OS=Homo sapiens GN=PRKDC PE=1 SV=3	13600	YJC_160818_PC9mem_AALmnp_G_01.12684.12684.2	controllerType=0 controllerNumber=1 scan=12684	80.9379
14563:2	46	K.AVAFFLESIAMHDIIAAEK.C			1038.55	2	2076.09	2076.08	0	2	1293	Specific	443.6	320.36	320.36	5.49	8	>sp|P78527|PRKDC_HUMAN DNA-dependent protein kinase catalytic subunit OS=Homo sapiens GN=PRKDC PE=1 SV=3	13600	YJC_160818_PC9mem_AALmnp_G_01.12683.12683.2	controllerType=0 controllerNumber=1 scan=12683	80.9319
13489:3	46	R.RGSC[+57.021]VTQ[+0.984]VGLLESVYEMFRK.D		C[+57], Q[+1]	787.4	3	2360.18	2360.17	0	4.7	1788	Specific	399.34	312.27	312.27	4.29	8	>sp|P78527|PRKDC_HUMAN DNA-dependent protein kinase catalytic subunit OS=Homo sapiens GN=PRKDC PE=1 SV=3	13600	YJC_160818_PC9mem_AALmnp_G_01.11653.11653.3	controllerType=0 controllerNumber=1 scan=11653	74.6247
21956:8	46	R.FLN[+3065.100]TTFSFFPPFVSC[+57.021]IQDISC[+57.021]QHAALLSLDPAAVSAGC[+57.021]LASLQQ[+0.984]PVGIR.L	HexNAc(6)Hex(6)Fuc(2)NeuAc(2)	C[+57]*3, N[+3065], Q[+1]	1052.85	8	8415.75	8417.75	-2	0.2	2843	Specific	459.53	16.68	16.68	0.11	8	>sp|P78527|PRKDC_HUMAN DNA-dependent protein kinase catalytic subunit OS=Homo sapiens GN=PRKDC PE=1 SV=3	13600	YJC_160818_PC9mem_AALmnp_G_01.19384.19384.5	controllerType=0 controllerNumber=1 scan=19384	125.131
20125:5	46	K.EISSVPC[+57.021]WQFISWISHMVALLDKDQAVAVQHSVEEITDNYPQAIVYPFIISSESYSFK.D		C[+57]	1341.26	5	6702.29	6702.29	0	0.6	3486	Specific	447.94	441.97	18.21	6.68	8	>sp|P78527|PRKDC_HUMAN DNA-dependent protein kinase catalytic subunit OS=Homo sapiens GN=PRKDC PE=1 SV=3	13600	YJC_160818_PC9mem_AALmnp_G_01.17811.17811.5	controllerType=0 controllerNumber=1 scan=17811	114.35
20124:5	46	K.EISSVPC[+57.021]WQ[+0.984]FISWISHMVALLDKDQAVAVQHSVEEITDNYPQAIVYPFIISSESYSFK.D		C[+57], Q[+1]	1341.46	5	6703.29	6703.27	0	2.5	3486	Specific	726.28	320.71	20.04	9.79	8	>sp|P78527|PRKDC_HUMAN DNA-dependent protein kinase catalytic subunit OS=Homo sapiens GN=PRKDC PE=1 SV=3	13600	YJC_160818_PC9mem_AALmnp_G_01.17810.17810.5	controllerType=0 controllerNumber=1 scan=17810	114.342
19261:6	46	K.EISSVPC[+57.021]WQFISWISHMVALLDKDQAVAVQHSVEEITDNYPQAIVYPFIISSESYSFKDTSTGHK.N		C[+57]	1238.95	6	7428.65	7428.62	0	4.1	3486	Specific	614.26	183.17	25.66	6.51	8	>sp|P78527|PRKDC_HUMAN DNA-dependent protein kinase catalytic subunit OS=Homo sapiens GN=PRKDC PE=1 SV=3	13600	YJC_160818_PC9mem_AALmnp_G_01.17021.17021.6	controllerType=0 controllerNumber=1 scan=17021	108.942
19263:6	46	K.EISSVPC[+57.021]WQFISWISHMVALLDKDQAVAVQHSVEEITDNYPQAIVYPFIISSESYSFKDTSTGHK.N		C[+57]	1238.95	6	7428.65	7428.62	0	4.1	3486	Specific	637.63	637.63	12.45	8.89	8	>sp|P78527|PRKDC_HUMAN DNA-dependent protein kinase catalytic subunit OS=Homo sapiens GN=PRKDC PE=1 SV=3	13600	YJC_160818_PC9mem_AALmnp_G_01.17022.17022.6	controllerType=0 controllerNumber=1 scan=17022	108.949
18117:3	46	R.LGLIEWLENTVTLKDLLLNTMSQEEK.A			1010.87	3	3030.6	3030.61	0	-3.8	3800	Specific	393.68	151.94	151.94	3.57	8	>sp|P78527|PRKDC_HUMAN DNA-dependent protein kinase catalytic subunit OS=Homo sapiens GN=PRKDC PE=1 SV=3	13600	YJC_160818_PC9mem_AALmnp_G_01.16010.16010.3	controllerType=0 controllerNumber=1 scan=16010	102.17
18119:3	46	R.LGLIEWLENTVTLKDLLLNTMSQEEK.A			1010.87	3	3030.6	3030.61	0	-3.8	3800	Specific	728.87	559.72	559.72	11.91	8	>sp|P78527|PRKDC_HUMAN DNA-dependent protein kinase catalytic subunit OS=Homo sapiens GN=PRKDC PE=1 SV=3	13600	YJC_160818_PC9mem_AALmnp_G_01.16011.16011.3	controllerType=0 controllerNumber=1 scan=16011	102.179
12517:3	47	R.KYGDPGSLFGFSLAMHWQLQPEDKR.L			969.809	3	2907.41	2907.42	0	-4.6	36	Specific	373.31	159.86	159.86	2.57	5	>sp|P23229|ITA6_HUMAN Integrin alpha-6 OS=Homo sapiens GN=ITGA6 PE=1 SV=5	8358	YJC_160818_PC9mem_AALmnp_G_01.10819.10819.3	controllerType=0 controllerNumber=1 scan=10819	69.4978
12518:3	47	R.KYGDPGSLFGFSLAMHWQLQPEDKR.L			969.809	3	2907.41	2907.42	0	-4.6	36	Specific	930.16	838.69	838.69	15.16	5	>sp|P23229|ITA6_HUMAN Integrin alpha-6 OS=Homo sapiens GN=ITGA6 PE=1 SV=5	8358	YJC_160818_PC9mem_AALmnp_G_01.10820.10820.3	controllerType=0 controllerNumber=1 scan=10820	69.5023
13420:4	47	K.FGSC[+57.021]QQGVAATFTKDFHYIVFGAPGTYNWK.G		C[+57]	850.156	4	3397.6	3397.61	0	-2.3	185	Specific	349.2	159.79	159.79	3.52	5	>sp|P23229|ITA6_HUMAN Integrin alpha-6 OS=Homo sapiens GN=ITGA6 PE=1 SV=5	8358	YJC_160818_PC9mem_AALmnp_G_01.11602.11602.3	controllerType=0 controllerNumber=1 scan=11602	74.3404
13422:4	47	K.FGSC[+57.021]QQGVAATFTKDFHYIVFGAPGTYNWK.G		C[+57]	850.156	4	3397.6	3397.61	0	-2.3	185	Specific	428.93	406.29	406.29	6.46	5	>sp|P23229|ITA6_HUMAN Integrin alpha-6 OS=Homo sapiens GN=ITGA6 PE=1 SV=5	8358	YJC_160818_PC9mem_AALmnp_G_01.11603.11603.3	controllerType=0 controllerNumber=1 scan=11603	74.3464
13428:3	47	K.FGSC[+57.021]QQGVAATFTKDFHYIVFGAPGTYNWK.G		C[+57]	1133.21	3	3397.63	3397.61	0	5.1	185	Specific	758.69	504.13	504.13	11.8	5	>sp|P23229|ITA6_HUMAN Integrin alpha-6 OS=Homo sapiens GN=ITGA6 PE=1 SV=5	8358	YJC_160818_PC9mem_AALmnp_G_01.11608.11608.3	controllerType=0 controllerNumber=1 scan=11608	74.3795
13430:3	47	K.FGSC[+57.021]QQGVAATFTKDFHYIVFGAPGTYNWK.G		C[+57]	1133.21	3	3397.63	3397.61	0	5.1	185	Specific	786.34	656.52	656.52	12.18	5	>sp|P23229|ITA6_HUMAN Integrin alpha-6 OS=Homo sapiens GN=ITGA6 PE=1 SV=5	8358	YJC_160818_PC9mem_AALmnp_G_01.11609.11609.3	controllerType=0 controllerNumber=1 scan=11609	74.3868
11455:6	47	R.VEQKN[+2569.905]NTFFDM[+15.995]N[+0.984]IFEDGPYEVGGETEHDESLVPVPANSYLGLLFLTSVSYTDPDQFVYKTRPPR.E	HexNAc(5)Hex(6)NeuAc(2)	M[+16], N[+1][+2570]	1650.73	6	9899.37	9899.39	0	-2.3	219	Specific	461.95	5	5	1.27	5	>sp|P23229|ITA6_HUMAN Integrin alpha-6 OS=Homo sapiens GN=ITGA6 PE=1 SV=5	8358	YJC_160818_PC9mem_AALmnp_G_01.9890.9890.2	controllerType=0 controllerNumber=1 scan=9890	63.8577
15082:6	47	K.SAHLLPEHIFDGEGLASSFGYDVAVVDLNKDGWQDIVIGAPQYFDRDGEVGGAVYVYMNQQGR.W			1148.39	6	6885.29	6885.3	0	-0.4	337	Specific	684.94	197.98	21.25	7.64	5	>sp|P23229|ITA6_HUMAN Integrin alpha-6 OS=Homo sapiens GN=ITGA6 PE=1 SV=5	8358	YJC_160818_PC9mem_AALmnp_G_01.13176.13176.6	controllerType=0 controllerNumber=1 scan=13176	83.9734
15084:6	47	K.SAHLLPEHIFDGEGLASSFGYDVAVVDLNKDGWQDIVIGAPQYFDRDGEVGGAVYVYMNQQGR.W			1148.39	6	6885.29	6885.3	0	-0.4	337	Specific	1265.71	1162.28	43.52	22.38	5	>sp|P23229|ITA6_HUMAN Integrin alpha-6 OS=Homo sapiens GN=ITGA6 PE=1 SV=5	8358	YJC_160818_PC9mem_AALmnp_G_01.13177.13177.6	controllerType=0 controllerNumber=1 scan=13177	83.9794
05018:3	47	K.VTC[+57.021]EPQKEINSLN[+2205.793]LTESHNSR.K	HexNAc(4)Hex(5)Fuc(2)NeuAc(1)	C[+57], N[+2206]	1554.67	3	4661.99	4661.98	0	2.5	918	Specific	107.88	7.75	5.2	1.78	5	>sp|P23229|ITA6_HUMAN Integrin alpha-6 OS=Homo sapiens GN=ITGA6 PE=1 SV=5	8358	YJC_160818_PC9mem_AALmnp_G_01.4816.4816.3	controllerType=0 controllerNumber=1 scan=4816	33.8395
22686:3	48	R.RAEPNVLLLDAGDQYQGTIWFTVYK.G			966.504	3	2897.5	2897.48	0	4.5	73	Specific	205.71	205.71	205.71	3.5	10	>sp|P21589|5NTD_HUMAN 5'-nucleotidase OS=Homo sapiens GN=NT5E PE=1 SV=1	142	YJC_160818_PC9mem_AALmnp_G_01.20872.20872.3	controllerType=0 controllerNumber=1 scan=20872	141.234
22685:3	48	R.RAEPNVLLLDAGDQYQGTIWFTVYK.G			966.504	3	2897.5	2897.48	0	4.5	73	Specific	631.54	403.73	403.73	8.84	10	>sp|P21589|5NTD_HUMAN 5'-nucleotidase OS=Homo sapiens GN=NT5E PE=1 SV=1	142	YJC_160818_PC9mem_AALmnp_G_01.20871.20871.3	controllerType=0 controllerNumber=1 scan=20871	141.228
13279:3	48	R.RAEPNVLLLDAGDQYQGTIWFTVYK.G			966.497	3	2897.48	2897.48	0	-1.8	73	Specific	680.46	644.14	644.14	10.84	10	>sp|P21589|5NTD_HUMAN 5'-nucleotidase OS=Homo sapiens GN=NT5E PE=1 SV=1	142	YJC_160818_PC9mem_AALmnp_G_01.11492.11492.3	controllerType=0 controllerNumber=1 scan=11492	73.7029
13277:3	48	R.RAEPNVLLLDAGDQYQGTIWFTVYK.G			966.497	3	2897.48	2897.48	0	-1.8	73	Specific	756.23	535.84	535.84	12.84	10	>sp|P21589|5NTD_HUMAN 5'-nucleotidase OS=Homo sapiens GN=NT5E PE=1 SV=1	142	YJC_160818_PC9mem_AALmnp_G_01.11491.11491.3	controllerType=0 controllerNumber=1 scan=11491	73.6971
15197:5	48	R.RAEPNVLLLDAGDQYQGTIWFTVYKGAEVAHFMNALR.Y			839.632	5	4194.13	4194.12	0	1.7	73	Specific	246.1	246.1	49.3	4.35	10	>sp|P21589|5NTD_HUMAN 5'-nucleotidase OS=Homo sapiens GN=NT5E PE=1 SV=1	142	YJC_160818_PC9mem_AALmnp_G_01.13278.13278.5	controllerType=0 controllerNumber=1 scan=13278	84.5974
09243:2	48	K.IIALGHSGFEMDKLIAQK.V			986.042	2	1971.08	1971.07	0	1.4	215	Specific	160.87	69.66	69.66	0.12	10	>sp|P21589|5NTD_HUMAN 5'-nucleotidase OS=Homo sapiens GN=NT5E PE=1 SV=1	142	YJC_160818_PC9mem_AALmnp_G_01.8076.8076.2	controllerType=0 controllerNumber=1 scan=8076	53.2981
09241:2	48	K.IIALGHSGFEMDKLIAQK.V			986.042	2	1971.08	1971.07	0	1.4	215	Specific	441.35	299.87	299.87	4.89	10	>sp|P21589|5NTD_HUMAN 5'-nucleotidase OS=Homo sapiens GN=NT5E PE=1 SV=1	142	YJC_160818_PC9mem_AALmnp_G_01.8075.8075.2	controllerType=0 controllerNumber=1 scan=8075	53.2951
09518:5	48	R.GVDVVVGGHSNTFLYTGNPPSKEVPAGKYPFIVTSDDGR.K			816.21	5	4077.02	4077.04	0	-3.1	235	Specific	337.3	129.3	48.04	3.23	10	>sp|P21589|5NTD_HUMAN 5'-nucleotidase OS=Homo sapiens GN=NT5E PE=1 SV=1	142	YJC_160818_PC9mem_AALmnp_G_01.8318.8318.5	controllerType=0 controllerNumber=1 scan=8318	54.8444
09520:5	48	R.GVDVVVGGHSNTFLYTGNPPSKEVPAGKYPFIVTSDDGR.K			816.21	5	4077.02	4077.04	0	-3.1	235	Specific	1061.26	1037.6	100.07	18.52	10	>sp|P21589|5NTD_HUMAN 5'-nucleotidase OS=Homo sapiens GN=NT5E PE=1 SV=1	142	YJC_160818_PC9mem_AALmnp_G_01.8319.8319.5	controllerType=0 controllerNumber=1 scan=8319	54.8511
04594:3	48	R.IKLDN[+2205.793]YSTQELGK.T	HexNAc(4)Hex(5)Fuc(2)NeuAc(1)	N[+2206]	1238.86	3	3714.58	3714.59	0	-2.4	329	Specific	518.3	166.79	166.79	5.03	10	>sp|P21589|5NTD_HUMAN 5'-nucleotidase OS=Homo sapiens GN=NT5E PE=1 SV=1	142	YJC_160818_PC9mem_AALmnp_G_01.4491.4491.3	controllerType=0 controllerNumber=1 scan=4491	31.9146
16220:3	48	R.SPIDERNN[+2205.793]GTITWENLAAVLPFGGTFDLVQLK.G	HexNAc(4)Hex(5)Fuc(2)NeuAc(1)	N[+2206]	1907.87	3	5721.61	5721.61	0	-0.3	396	Specific	210.7	112.55	7.66	3.51	10	>sp|P21589|5NTD_HUMAN 5'-nucleotidase OS=Homo sapiens GN=NT5E PE=1 SV=1	142	YJC_160818_PC9mem_AALmnp_G_01.14264.14264.3	controllerType=0 controllerNumber=1 scan=14264	90.8105
15758:3	48	R.SPIDERNN[+1914.697]GTITWENLAAVLPFGGTFDLVQLK.G	HexNAc(4)Hex(5)Fuc(2)	N[+1915]	1810.84	3	5430.51	5430.51	0	-1.5	396	Specific	254.21	163.2	4.39	4.81	10	>sp|P21589|5NTD_HUMAN 5'-nucleotidase OS=Homo sapiens GN=NT5E PE=1 SV=1	142	YJC_160818_PC9mem_AALmnp_G_01.13834.13834.3	controllerType=0 controllerNumber=1 scan=13834	88.1163
16219:3	48	R.SPIDERNN[+2205.793]GTITWENLAAVLPFGGTFDLVQLK.G	HexNAc(4)Hex(5)Fuc(2)NeuAc(1)	N[+2206]	1907.87	3	5721.61	5721.61	0	-0.3	396	Specific	323.42	43.83	43.83	1.02	10	>sp|P21589|5NTD_HUMAN 5'-nucleotidase OS=Homo sapiens GN=NT5E PE=1 SV=1	142	YJC_160818_PC9mem_AALmnp_G_01.14263.14263.3	controllerType=0 controllerNumber=1 scan=14263	90.8082
16255:4	48	R.SPIDERNN[+2059.735]GTITWENLAAVLPFGGTFDLVQLK.G	HexNAc(4)Hex(5)Fuc(1)NeuAc(1)	N[+2060]	1394.39	4	5574.54	5575.55	-1	-2.4	396	Specific	369.87	300.29	300.29	4.69	10	>sp|P21589|5NTD_HUMAN 5'-nucleotidase OS=Homo sapiens GN=NT5E PE=1 SV=1	142	YJC_160818_PC9mem_AALmnp_G_01.14295.14295.4	controllerType=0 controllerNumber=1 scan=14295	90.9991
15736:4	48	R.SPIDERNN[+2059.735]GTITWENLAAVLPFGGTFDLVQLK.G	HexNAc(4)Hex(5)Fuc(1)NeuAc(1)	N[+2060]	1394.65	4	5575.57	5575.55	0	2.7	396	Specific	389.13	280.62	12.11	4.64	10	>sp|P21589|5NTD_HUMAN 5'-nucleotidase OS=Homo sapiens GN=NT5E PE=1 SV=1	142	YJC_160818_PC9mem_AALmnp_G_01.13814.13814.4	controllerType=0 controllerNumber=1 scan=13814	87.9913
16200:4	48	R.SPIDERNN[+2205.793]GTITWENLAAVLPFGGTFDLVQLK.G	HexNAc(4)Hex(5)Fuc(2)NeuAc(1)	N[+2206]	1430.91	4	5720.6	5721.61	-1	-0.5	396	Specific	400.72	302.67	21.69	4.76	10	>sp|P21589|5NTD_HUMAN 5'-nucleotidase OS=Homo sapiens GN=NT5E PE=1 SV=1	142	YJC_160818_PC9mem_AALmnp_G_01.14246.14246.4	controllerType=0 controllerNumber=1 scan=14246	90.7198
15746:4	48	R.SPIDERNN[+1913.677]GTITWENLAAVLPFGGTFDLVQLK.G	HexNAc(4)Hex(5)Fuc(0)NeuAc(1)	N[+1914]	1358.13	4	5429.49	5429.49	0	0.1	396	Specific	401.76	316.24	13.12	4.95	10	>sp|P21589|5NTD_HUMAN 5'-nucleotidase OS=Homo sapiens GN=NT5E PE=1 SV=1	142	YJC_160818_PC9mem_AALmnp_G_01.13823.13823.4	controllerType=0 controllerNumber=1 scan=13823	88.0491
16199:4	48	R.SPIDERNN[+2205.793]GTITWENLAAVLPFGGTFDLVQLK.G	HexNAc(4)Hex(5)Fuc(2)NeuAc(1)	N[+2206]	1430.91	4	5720.6	5721.61	-1	-0.5	396	Specific	454.44	40.06	20.17	0.47	10	>sp|P21589|5NTD_HUMAN 5'-nucleotidase OS=Homo sapiens GN=NT5E PE=1 SV=1	142	YJC_160818_PC9mem_AALmnp_G_01.14245.14245.4	controllerType=0 controllerNumber=1 scan=14245	90.7139
16209:5	48	R.SPIDERNN[+2205.793]GTITWENLAAVLPFGGTFDLVQLK.G	HexNAc(4)Hex(5)Fuc(2)NeuAc(1)	N[+2206]	1145.13	5	5721.61	5721.61	0	-0.2	396	Specific	503.2	17.63	17.63	0.54	10	>sp|P21589|5NTD_HUMAN 5'-nucleotidase OS=Homo sapiens GN=NT5E PE=1 SV=1	142	YJC_160818_PC9mem_AALmnp_G_01.14256.14256.5	controllerType=0 controllerNumber=1 scan=14256	90.7741
15735:4	48	R.SPIDERNN[+2059.735]GTITWENLAAVLPFGGTFDLVQLK.G	HexNAc(4)Hex(5)Fuc(1)NeuAc(1)	N[+2060]	1394.65	4	5575.57	5575.55	0	2.7	396	Specific	511.01	35.18	35.18	0.98	10	>sp|P21589|5NTD_HUMAN 5'-nucleotidase OS=Homo sapiens GN=NT5E PE=1 SV=1	142	YJC_160818_PC9mem_AALmnp_G_01.13813.13813.4	controllerType=0 controllerNumber=1 scan=13813	87.9853
16211:5	48	R.SPIDERNN[+2205.793]GTITWENLAAVLPFGGTFDLVQLK.G	HexNAc(4)Hex(5)Fuc(2)NeuAc(1)	N[+2206]	1145.13	5	5721.61	5721.61	0	-0.2	396	Specific	515.05	426.04	29.25	6.21	10	>sp|P21589|5NTD_HUMAN 5'-nucleotidase OS=Homo sapiens GN=NT5E PE=1 SV=1	142	YJC_160818_PC9mem_AALmnp_G_01.14257.14257.5	controllerType=0 controllerNumber=1 scan=14257	90.7768
15745:4	48	R.SPIDERN[+0.984]N[+1913.677]GTITWENLAAVLPFGGTFDLVQLK.G	HexNAc(4)Hex(5)NeuAc(1)	N[+1][+1914]	1358.13	4	5429.49	5430.48	-1	3.6	396	Specific	439.11	9.44	4.56	0.08	10	>sp|P21589|5NTD_HUMAN 5'-nucleotidase OS=Homo sapiens GN=NT5E PE=1 SV=1	142	YJC_160818_PC9mem_AALmnp_G_01.13822.13822.4	controllerType=0 controllerNumber=1 scan=13822	88.0434
19270:4	49	R.FKKRPGIETLFQQLAPLYEIVIFTSETGMTAFPLIDSVDPHGFISYR.L			1343.71	4	5371.81	5372.81	-1	1.8	171	Specific	941.34	544.88	544.88	14.39	3	>sp|Q3ZCQ8|TIM50_HUMAN Mitochondrial import inner membrane translocase subunit TIM50 OS=Homo sapiens GN=TIMM50 PE=1 SV=2	17488	YJC_160818_PC9mem_AALmnp_G_01.17025.17025.2	controllerType=0 controllerNumber=1 scan=17025	108.965
19967:4	49	K.KRPGIETLFQQLAPLYEIVIFTSETGMTAFPLIDSVDPHGFISYR.L			1275.16	4	5097.63	5097.64	0	-2.2	173	Specific	914.79	914.79	305.26	15.47	3	>sp|Q3ZCQ8|TIM50_HUMAN Mitochondrial import inner membrane translocase subunit TIM50 OS=Homo sapiens GN=TIMM50 PE=1 SV=2	17488	YJC_160818_PC9mem_AALmnp_G_01.17657.17657.4	controllerType=0 controllerNumber=1 scan=17657	113.297
19965:4	49	K.KRPGIETLFQQLAPLYEIVIFTSETGMTAFPLIDSVDPHGFISYR.L			1275.16	4	5097.63	5097.64	0	-2.2	173	Specific	1076.54	657.71	19.89	18.47	3	>sp|Q3ZCQ8|TIM50_HUMAN Mitochondrial import inner membrane translocase subunit TIM50 OS=Homo sapiens GN=TIMM50 PE=1 SV=2	17488	YJC_160818_PC9mem_AALmnp_G_01.17656.17656.4	controllerType=0 controllerNumber=1 scan=17656	113.289
20885:4	49	K.RPGIETLFQQLAPLYEIVIFTSETGMTAFPLIDSVDPHGFISYR.L			1243.14	4	4969.55	4969.55	0	-0.2	174	Specific	566.2	566.2	169.69	7.64	3	>sp|Q3ZCQ8|TIM50_HUMAN Mitochondrial import inner membrane translocase subunit TIM50 OS=Homo sapiens GN=TIMM50 PE=1 SV=2	17488	YJC_160818_PC9mem_AALmnp_G_01.18471.18471.4	controllerType=0 controllerNumber=1 scan=18471	118.909
20883:4	49	K.RPGIETLFQQLAPLYEIVIFTSETGMTAFPLIDSVDPHGFISYR.L			1243.14	4	4969.55	4969.55	0	-0.2	174	Specific	991.76	551.47	38.65	16.56	3	>sp|Q3ZCQ8|TIM50_HUMAN Mitochondrial import inner membrane translocase subunit TIM50 OS=Homo sapiens GN=TIMM50 PE=1 SV=2	17488	YJC_160818_PC9mem_AALmnp_G_01.18470.18470.4	controllerType=0 controllerNumber=1 scan=18470	118.904
15325:4	50	K.VFESIGKFGLALAVAGGVVNSALYNVDAGHR.A			783.67	4	3131.66	3131.66	0	-2.1	5	Specific	510.66	374.88	374.88	5.82	5	>sp|P35232|PHB_HUMAN Prohibitin OS=Homo sapiens GN=PHB PE=1 SV=1	12956	YJC_160818_PC9mem_AALmnp_G_01.13423.13423.4	controllerType=0 controllerNumber=1 scan=13423	85.5338
15327:4	50	K.VFESIGKFGLALAVAGGVVNSALYNVDAGHR.A			783.67	4	3131.66	3131.66	0	-2.1	5	Specific	800.3	772.38	772.38	13.75	5	>sp|P35232|PHB_HUMAN Prohibitin OS=Homo sapiens GN=PHB PE=1 SV=1	12956	YJC_160818_PC9mem_AALmnp_G_01.13424.13424.4	controllerType=0 controllerNumber=1 scan=13424	85.5396
13405:3	50	K.FGLALAVAGGVVNSALYNVDAGHR.A			791.086	3	2371.24	2371.25	0	-3.2	12	Specific	572.45	557.96	557.96	7.95	5	>sp|P35232|PHB_HUMAN Prohibitin OS=Homo sapiens GN=PHB PE=1 SV=1	12956	YJC_160818_PC9mem_AALmnp_G_01.11588.11588.3	controllerType=0 controllerNumber=1 scan=11588	74.2488
13403:3	50	K.FGLALAVAGGVVNSALYNVDAGHR.A			791.086	3	2371.24	2371.25	0	-3.2	12	Specific	700.15	546.43	546.43	11.87	5	>sp|P35232|PHB_HUMAN Prohibitin OS=Homo sapiens GN=PHB PE=1 SV=1	12956	YJC_160818_PC9mem_AALmnp_G_01.11587.11587.3	controllerType=0 controllerNumber=1 scan=11587	74.2429
14773:5	50	R.AVIFDRFRGVQDIVVGEGTHFLIPWVQKPIIFDC[+57.021]R.S		C[+57]	826.244	5	4127.19	4128.2	-1	-1.1	36	Specific	363.45	192.3	192.3	3.63	5	>sp|P35232|PHB_HUMAN Prohibitin OS=Homo sapiens GN=PHB PE=1 SV=1	12956	YJC_160818_PC9mem_AALmnp_G_01.12901.12901.5	controllerType=0 controllerNumber=1 scan=12901	82.3053
14775:5	50	R.AVIFDRFRGVQDIVVGEGTHFLIPWVQKPIIFDC[+57.021]R.S		C[+57]	826.244	5	4127.19	4128.2	-1	-1.1	36	Specific	681.12	654.09	654.09	10.07	5	>sp|P35232|PHB_HUMAN Prohibitin OS=Homo sapiens GN=PHB PE=1 SV=1	12956	YJC_160818_PC9mem_AALmnp_G_01.12902.12902.5	controllerType=0 controllerNumber=1 scan=12902	82.3111
14655:4	50	R.AATFGLILDDVSLTHLTFGKEFTEAVEAK.Q			781.66	4	3123.62	3123.62	0	-1.7	158	Specific	450.67	225.78	225.78	4.7	5	>sp|P35232|PHB_HUMAN Prohibitin OS=Homo sapiens GN=PHB PE=1 SV=1	12956	YJC_160818_PC9mem_AALmnp_G_01.12766.12766.4	controllerType=0 controllerNumber=1 scan=12766	81.4391
14657:4	50	R.AATFGLILDDVSLTHLTFGKEFTEAVEAK.Q			781.66	4	3123.62	3123.62	0	-1.7	158	Specific	897.55	847.03	847.03	14.78	5	>sp|P35232|PHB_HUMAN Prohibitin OS=Homo sapiens GN=PHB PE=1 SV=1	12956	YJC_160818_PC9mem_AALmnp_G_01.12767.12767.4	controllerType=0 controllerNumber=1 scan=12767	81.4451
15018:6	51	R.TVYMESLHMQGEIENQITAAFTMIGTSSHLSDKC[+57.021]SQFAIPSLC[+57.021]HYAFPYC[+57.021]DETSSVPKPR.D		C[+57]*3	1145.36	6	6867.1	6868.16	-1	-7.8	186	Specific	597.19	105.18	105.18	4.18	5	>sp|Q01973|ROR1_HUMAN Tyrosine-protein kinase transmembrane receptor ROR1 OS=Homo sapiens GN=ROR1 PE=1 SV=2	14816	YJC_160818_PC9mem_AALmnp_G_01.13118.13118.2	controllerType=0 controllerNumber=1 scan=13118	83.6489
15012:7	51	R.TVYMESLHMQGEIENQITAAFTMIGTSSHLSDKC[+57.021]SQFAIPSLC[+57.021]HYAFPYC[+57.021]DETSSVPKPR.D		C[+57]*3	982.027	7	6868.15	6868.16	0	-1.9	186	Specific	1477.52	1399.62	55.41	26.82	5	>sp|Q01973|ROR1_HUMAN Tyrosine-protein kinase transmembrane receptor ROR1 OS=Homo sapiens GN=ROR1 PE=1 SV=2	14816	YJC_160818_PC9mem_AALmnp_G_01.13114.13114.7	controllerType=0 controllerNumber=1 scan=13114	83.6227
02016:3	51	K.C[+57.021]YN[+2205.793]STGVDYR.G	HexNAc(4)Hex(5)Fuc(2)NeuAc(1)	C[+57], N[+2206]	1147.44	3	3440.31	3440.31	0	-0.2	313	Specific	110.61	21.67	21.67	0.97	5	>sp|Q01973|ROR1_HUMAN Tyrosine-protein kinase transmembrane receptor ROR1 OS=Homo sapiens GN=ROR1 PE=1 SV=2	14816	YJC_160818_PC9mem_AALmnp_G_01.2488.2488.3	controllerType=0 controllerNumber=1 scan=2488	20.2561
17859:5	51	K.SSLDHGDFLHIAIQIAAGMEYLSSHFFVHKDLAAR.N			780.194	5	3896.94	3896.95	0	-2.7	585	Specific	666.68	479.6	479.6	10.22	5	>sp|Q01973|ROR1_HUMAN Tyrosine-protein kinase transmembrane receptor ROR1 OS=Homo sapiens GN=ROR1 PE=1 SV=2	14816	YJC_160818_PC9mem_AALmnp_G_01.15765.15765.5	controllerType=0 controllerNumber=1 scan=15765	100.578
17861:5	51	K.SSLDHGDFLHIAIQIAAGMEYLSSHFFVHKDLAAR.N			780.194	5	3896.94	3896.95	0	-2.7	585	Specific	1177.07	1165.93	1165.93	20.22	5	>sp|Q01973|ROR1_HUMAN Tyrosine-protein kinase transmembrane receptor ROR1 OS=Homo sapiens GN=ROR1 PE=1 SV=2	14816	YJC_160818_PC9mem_AALmnp_G_01.15766.15766.5	controllerType=0 controllerNumber=1 scan=15766	100.584
16307:4	52	K.LKHVVLDEVDQMLDMGFADQVEEILSVAYKK.D			891.458	4	3562.81	3562.82	0	-1.8	333	Specific	366.96	187.76	187.76	3.27	3	>sp|Q9NR30|DDX21_HUMAN Nucleolar RNA helicase 2 OS=Homo sapiens GN=DDX21 PE=1 SV=5	4433	YJC_160818_PC9mem_AALmnp_G_01.14370.14370.4	controllerType=0 controllerNumber=1 scan=14370	91.5345
16309:4	52	K.LKHVVLDEVDQMLDMGFADQVEEILSVAYKK.D			891.458	4	3562.81	3562.82	0	-1.8	333	Specific	840.72	801.58	801.58	13.29	3	>sp|Q9NR30|DDX21_HUMAN Nucleolar RNA helicase 2 OS=Homo sapiens GN=DDX21 PE=1 SV=5	4433	YJC_160818_PC9mem_AALmnp_G_01.14371.14371.4	controllerType=0 controllerNumber=1 scan=14371	91.5419
16991:4	52	K.HVVLDEVDQMLDMGFADQVEEILSVAYKK.D			831.164	4	3321.64	3321.64	0	-0.9	335	Specific	483.99	358.92	358.92	5.57	3	>sp|Q9NR30|DDX21_HUMAN Nucleolar RNA helicase 2 OS=Homo sapiens GN=DDX21 PE=1 SV=5	4433	YJC_160818_PC9mem_AALmnp_G_01.14979.14979.4	controllerType=0 controllerNumber=1 scan=14979	95.4354
16992:4	52	K.HVVLDEVDQMLDMGFADQVEEILSVAYKK.D			831.164	4	3321.64	3321.64	0	-0.9	335	Specific	972.55	972.55	972.55	16.73	3	>sp|Q9NR30|DDX21_HUMAN Nucleolar RNA helicase 2 OS=Homo sapiens GN=DDX21 PE=1 SV=5	4433	YJC_160818_PC9mem_AALmnp_G_01.14980.14980.4	controllerType=0 controllerNumber=1 scan=14980	95.4419
07131:4	52	R.AGRTGVC[+57.021]IC[+57.021]FYQHKEEYQLVQVEQK.A		C[+57]*2	768.374	4	3070.48	3070.49	0	-3.9	531	Specific	622.29	440.96	440.96	8.95	3	>sp|Q9NR30|DDX21_HUMAN Nucleolar RNA helicase 2 OS=Homo sapiens GN=DDX21 PE=1 SV=5	4433	YJC_160818_PC9mem_AALmnp_G_01.6418.6418.4	controllerType=0 controllerNumber=1 scan=6418	43.6383
07132:4	52	R.AGRTGVC[+57.021]IC[+57.021]FYQHKEEYQLVQVEQK.A		C[+57]*2	768.374	4	3070.48	3070.49	0	-3.9	531	Specific	1039.65	830.06	830.06	17.57	3	>sp|Q9NR30|DDX21_HUMAN Nucleolar RNA helicase 2 OS=Homo sapiens GN=DDX21 PE=1 SV=5	4433	YJC_160818_PC9mem_AALmnp_G_01.6419.6419.4	controllerType=0 controllerNumber=1 scan=6419	43.6446
08943:3	53	R.FLLVYLHGDDHQDSDEFC[+57.021]R.N		C[+57]	789.354	3	2366.05	2366.05	0	-1.6	172	Specific	512.39	409.87	409.87	6.46	3	>sp|Q96CS3|FAF2_HUMAN FAS-associated factor 2 OS=Homo sapiens GN=FAF2 PE=1 SV=2	5897	YJC_160818_PC9mem_AALmnp_G_01.7846.7846.3	controllerType=0 controllerNumber=1 scan=7846	51.988
08945:3	53	R.FLLVYLHGDDHQDSDEFC[+57.021]R.N		C[+57]	789.354	3	2366.05	2366.05	0	-1.6	172	Specific	783.59	704.25	704.25	12.56	3	>sp|Q96CS3|FAF2_HUMAN FAS-associated factor 2 OS=Homo sapiens GN=FAF2 PE=1 SV=2	5897	YJC_160818_PC9mem_AALmnp_G_01.7847.7847.3	controllerType=0 controllerNumber=1 scan=7847	51.9958
14404:4	53	R.NTLC[+57.021]APEVISLINTRMLFWAC[+57.021]STNKPEGYR.V		C[+57]*2	886.191	4	3541.74	3541.74	0	0.5	191	Specific	892.98	807.32	807.32	14.65	3	>sp|Q96CS3|FAF2_HUMAN FAS-associated factor 2 OS=Homo sapiens GN=FAF2 PE=1 SV=2	5897	YJC_160818_PC9mem_AALmnp_G_01.12509.12509.4	controllerType=0 controllerNumber=1 scan=12509	79.842
14477:5	53	R.FHFSQSLTVIHDFLFSLKESPEKFQIEANFPR.R			768.596	5	3838.95	3838.96	0	-1.9	378	Specific	358.76	212.13	212.13	3.62	3	>sp|Q96CS3|FAF2_HUMAN FAS-associated factor 2 OS=Homo sapiens GN=FAF2 PE=1 SV=2	5897	YJC_160818_PC9mem_AALmnp_G_01.12580.12580.5	controllerType=0 controllerNumber=1 scan=12580	80.2684
14487:4	53	R.FHFSQSLTVIHDFLFSLKESPEKFQIEANFPR.R			960.493	4	3838.95	3838.96	0	-2.4	378	Specific	524.7	297.22	297.22	4.75	3	>sp|Q96CS3|FAF2_HUMAN FAS-associated factor 2 OS=Homo sapiens GN=FAF2 PE=1 SV=2	5897	YJC_160818_PC9mem_AALmnp_G_01.12593.12593.4	controllerType=0 controllerNumber=1 scan=12593	80.354
14478:5	53	R.FHFSQSLTVIHDFLFSLKESPEKFQIEANFPR.R			768.596	5	3838.95	3838.96	0	-1.9	378	Specific	1147.49	1071.24	1071.24	19.29	3	>sp|Q96CS3|FAF2_HUMAN FAS-associated factor 2 OS=Homo sapiens GN=FAF2 PE=1 SV=2	5897	YJC_160818_PC9mem_AALmnp_G_01.12581.12581.5	controllerType=0 controllerNumber=1 scan=12581	80.2744
14488:4	53	R.FHFSQSLTVIHDFLFSLKESPEKFQIEANFPR.R			960.493	4	3838.95	3838.96	0	-2.4	378	Specific	1256.29	1114.06	1114.06	22.09	3	>sp|Q96CS3|FAF2_HUMAN FAS-associated factor 2 OS=Homo sapiens GN=FAF2 PE=1 SV=2	5897	YJC_160818_PC9mem_AALmnp_G_01.12594.12594.4	controllerType=0 controllerNumber=1 scan=12594	80.3604
17289:4	54	K.DLDQC[+57.021]RDGKVGFQSFFSLIAGLTIAC[+57.021]NDYFVVHMK.Q		C[+57]*2	1013.74	4	4051.95	4051.95	0	0.2	58	Specific	400.63	111.44	75.51	2.45	4	>sp|P60903|S10AA_HUMAN Protein S100-A10 OS=Homo sapiens GN=S100A10 PE=1 SV=2	15100	YJC_160818_PC9mem_AALmnp_G_01.15258.15258.4	controllerType=0 controllerNumber=1 scan=15258	97.2831
17241:3	54	K.DLDQC[+57.021]RDGKVGFQSFFSLIAGLTIAC[+57.021]NDYFVVHMK.Q		C[+57]*2	1351.65	3	4052.94	4051.95	1	-3.8	58	Specific	601.74	578.5	114.84	9.05	4	>sp|P60903|S10AA_HUMAN Protein S100-A10 OS=Homo sapiens GN=S100A10 PE=1 SV=2	15100	YJC_160818_PC9mem_AALmnp_G_01.15203.15203.3	controllerType=0 controllerNumber=1 scan=15203	96.9146
17239:3	54	K.DLDQC[+57.021]RDGKVGFQSFFSLIAGLTIAC[+57.021]NDYFVVHMK.Q		C[+57]*2	1351.65	3	4052.94	4051.95	1	-3.8	58	Specific	602.16	191.71	163.19	5.87	4	>sp|P60903|S10AA_HUMAN Protein S100-A10 OS=Homo sapiens GN=S100A10 PE=1 SV=2	15100	YJC_160818_PC9mem_AALmnp_G_01.15202.15202.3	controllerType=0 controllerNumber=1 scan=15202	96.9118
17291:4	54	K.DLDQC[+57.021]RDGKVGFQSFFSLIAGLTIAC[+57.021]NDYFVVHMK.Q		C[+57]*2	1013.74	4	4051.95	4051.95	0	0.2	58	Specific	611.8	510	189.35	9.22	4	>sp|P60903|S10AA_HUMAN Protein S100-A10 OS=Homo sapiens GN=S100A10 PE=1 SV=2	15100	YJC_160818_PC9mem_AALmnp_G_01.15259.15259.4	controllerType=0 controllerNumber=1 scan=15259	97.2909
16587:4	54	K.DLDQC[+57.021]RDGKVGFQSFFSLIAGLTIAC[+57.021]NDYFVVHM[+15.995]K.Q		C[+57]*2, M[+16]	1017.74	4	4067.94	4067.95	0	-1.1	58	Specific	597.29	286.32	66.36	6.48	4	>sp|P60903|S10AA_HUMAN Protein S100-A10 OS=Homo sapiens GN=S100A10 PE=1 SV=2	15100	YJC_160818_PC9mem_AALmnp_G_01.14629.14629.6	controllerType=0 controllerNumber=1 scan=14629	93.1891
16593:4	54	K.DLDQC[+57.021]RDGKVGFQSFFSLIAGLTIAC[+57.021]NDYFVVHM[+15.995]K.Q		C[+57]*2, M[+16]	1017.74	4	4067.94	4067.95	0	-2.2	58	Specific	643.78	332.04	110.16	7.9	4	>sp|P60903|S10AA_HUMAN Protein S100-A10 OS=Homo sapiens GN=S100A10 PE=1 SV=2	15100	YJC_160818_PC9mem_AALmnp_G_01.14635.14635.4	controllerType=0 controllerNumber=1 scan=14635	93.2305
16589:4	54	K.DLDQC[+57.021]RDGKVGFQSFFSLIAGLTIAC[+57.021]NDYFVVHM[+15.995]K.Q		C[+57]*2, M[+16]	1017.74	4	4067.94	4067.95	0	-1.1	58	Specific	656.23	490.43	144.01	9.72	4	>sp|P60903|S10AA_HUMAN Protein S100-A10 OS=Homo sapiens GN=S100A10 PE=1 SV=2	15100	YJC_160818_PC9mem_AALmnp_G_01.14630.14630.6	controllerType=0 controllerNumber=1 scan=14630	93.1953
16595:4	54	K.DLDQC[+57.021]RDGKVGFQSFFSLIAGLTIAC[+57.021]NDYFVVHM[+15.995]K.Q		C[+57]*2, M[+16]	1017.74	4	4067.94	4067.95	0	-2.2	58	Specific	671.96	580.89	187.09	10.47	4	>sp|P60903|S10AA_HUMAN Protein S100-A10 OS=Homo sapiens GN=S100A10 PE=1 SV=2	15100	YJC_160818_PC9mem_AALmnp_G_01.14636.14636.4	controllerType=0 controllerNumber=1 scan=14636	93.2364
17987:4	54	R.DGKVGFQSFFSLIAGLTIAC[+57.021]NDYFVVHMK.Q		C[+57]	816.909	4	3264.61	3264.62	0	-2.3	64	Specific	580.07	383.28	383.28	8.28	4	>sp|P60903|S10AA_HUMAN Protein S100-A10 OS=Homo sapiens GN=S100A10 PE=1 SV=2	15100	YJC_160818_PC9mem_AALmnp_G_01.15868.15868.4	controllerType=0 controllerNumber=1 scan=15868	101.182
17988:4	54	R.DGKVGFQSFFSLIAGLTIAC[+57.021]NDYFVVHMK.Q		C[+57]	816.909	4	3264.61	3264.62	0	-2.3	64	Specific	839.98	832.62	832.62	13.9	4	>sp|P60903|S10AA_HUMAN Protein S100-A10 OS=Homo sapiens GN=S100A10 PE=1 SV=2	15100	YJC_160818_PC9mem_AALmnp_G_01.15869.15869.4	controllerType=0 controllerNumber=1 scan=15869	101.188
18849:3	54	K.VGFQSFFSLIAGLTIAC[+57.021]NDYFVVHMK.Q		C[+57]	988.829	3	2964.47	2964.48	0	-1.8	67	Specific	711.53	695.22	695.22	11.84	4	>sp|P60903|S10AA_HUMAN Protein S100-A10 OS=Homo sapiens GN=S100A10 PE=1 SV=2	15100	YJC_160818_PC9mem_AALmnp_G_01.16667.16667.3	controllerType=0 controllerNumber=1 scan=16667	106.546
18847:3	54	K.VGFQSFFSLIAGLTIAC[+57.021]NDYFVVHMK.Q		C[+57]	988.829	3	2964.47	2964.48	0	-1.8	67	Specific	869.41	584.46	584.46	14.84	4	>sp|P60903|S10AA_HUMAN Protein S100-A10 OS=Homo sapiens GN=S100A10 PE=1 SV=2	15100	YJC_160818_PC9mem_AALmnp_G_01.16666.16666.3	controllerType=0 controllerNumber=1 scan=16666	106.54
20488:4	55	K.VTRVEFEELC[+57.021]ADLFERVPGPVQQALQSAEMSLDEIEQVILVGGATR.V		C[+57]	1283.15	4	5129.59	5129.59	0	-0.7	343	Specific	435.76	78.69	40.28	1.78	3	>sp|Q9Y4L1|HYOU1_HUMAN Hypoxia up-regulated protein 1 OS=Homo sapiens GN=HYOU1 PE=1 SV=1	7847	YJC_160818_PC9mem_AALmnp_G_01.18124.18124.4	controllerType=0 controllerNumber=1 scan=18124	116.529
20490:4	55	K.VTRVEFEELC[+57.021]ADLFERVPGPVQQALQSAEMSLDEIEQVILVGGATR.V		C[+57]	1283.15	4	5129.59	5129.59	0	-0.7	343	Specific	820.79	820.79	144.79	13.52	3	>sp|Q9Y4L1|HYOU1_HUMAN Hypoxia up-regulated protein 1 OS=Homo sapiens GN=HYOU1 PE=1 SV=1	7847	YJC_160818_PC9mem_AALmnp_G_01.18125.18125.4	controllerType=0 controllerNumber=1 scan=18125	116.536
17564:4	55	K.AHFNLDESGVLSLDRVESVFETLVEDSAEEESTLTK.L			999.738	4	3995.93	3995.92	0	1.2	541	Specific	401.43	171.11	171.11	3.38	3	>sp|Q9Y4L1|HYOU1_HUMAN Hypoxia up-regulated protein 1 OS=Homo sapiens GN=HYOU1 PE=1 SV=1	7847	YJC_160818_PC9mem_AALmnp_G_01.15504.15504.4	controllerType=0 controllerNumber=1 scan=15504	98.8407
17566:4	55	K.AHFNLDESGVLSLDRVESVFETLVEDSAEEESTLTK.L			999.738	4	3995.93	3995.92	0	1.2	541	Specific	827.93	822	822	13.39	3	>sp|Q9Y4L1|HYOU1_HUMAN Hypoxia up-regulated protein 1 OS=Homo sapiens GN=HYOU1 PE=1 SV=1	7847	YJC_160818_PC9mem_AALmnp_G_01.15505.15505.4	controllerType=0 controllerNumber=1 scan=15505	98.8468
12684:4	55	K.AANSLEAFIFETQDKLYQPEYQEVSTEEQREEISGK.L			1052.5	4	4206.99	4207	0	-2	739	Specific	446.87	100.65	8.74	3.25	3	>sp|Q9Y4L1|HYOU1_HUMAN Hypoxia up-regulated protein 1 OS=Homo sapiens GN=HYOU1 PE=1 SV=1	7847	YJC_160818_PC9mem_AALmnp_G_01.10978.10978.4	controllerType=0 controllerNumber=1 scan=10978	70.5199
12686:4	55	K.AANSLEAFIFETQDKLYQPEYQEVSTEEQREEISGK.L			1052.5	4	4206.99	4207	0	-2	739	Specific	1154.31	927.93	214.23	20.61	3	>sp|Q9Y4L1|HYOU1_HUMAN Hypoxia up-regulated protein 1 OS=Homo sapiens GN=HYOU1 PE=1 SV=1	7847	YJC_160818_PC9mem_AALmnp_G_01.10979.10979.4	controllerType=0 controllerNumber=1 scan=10979	70.5266
18129:3	56	R.TGPAATTLPDGAAAESLVESSEVAVIGFFKDVESDSAK.Q			1256.29	3	3766.86	3766.85	0	0.5	133	Specific	777.01	430.67	430.67	11.93	5	>sp|P07237|PDIA1_HUMAN Protein disulfide-isomerase OS=Homo sapiens GN=P4HB PE=1 SV=3	12780	YJC_160818_PC9mem_AALmnp_G_01.16018.16018.3	controllerType=0 controllerNumber=1 scan=16018	102.227
18131:3	56	R.TGPAATTLPDGAAAESLVESSEVAVIGFFKDVESDSAK.Q			1256.29	3	3766.86	3766.85	0	0.5	133	Specific	795.46	762.68	762.68	12.55	5	>sp|P07237|PDIA1_HUMAN Protein disulfide-isomerase OS=Homo sapiens GN=P4HB PE=1 SV=3	12780	YJC_160818_PC9mem_AALmnp_G_01.16019.16019.3	controllerType=0 controllerNumber=1 scan=16019	102.23
21717:5	56	R.TGPAATTLPDGAAAESLVESSEVAVIGFFKDVESDSAKQFLQAAEAIDDIPFGITSNSDVFSK.Y			1292.84	5	6460.17	6461.17	-1	0.7	133	Specific	481.32	56.13	56.13	0.53	5	>sp|P07237|PDIA1_HUMAN Protein disulfide-isomerase OS=Homo sapiens GN=P4HB PE=1 SV=3	12780	YJC_160818_PC9mem_AALmnp_G_01.19205.19205.5	controllerType=0 controllerNumber=1 scan=19205	124.034
21719:5	56	R.TGPAATTLPDGAAAESLVESSEVAVIGFFKDVESDSAKQFLQAAEAIDDIPFGITSNSDVFSK.Y			1292.84	5	6460.17	6461.17	-1	0.7	133	Specific	504.78	447.59	447.59	6	5	>sp|P07237|PDIA1_HUMAN Protein disulfide-isomerase OS=Homo sapiens GN=P4HB PE=1 SV=3	12780	YJC_160818_PC9mem_AALmnp_G_01.19206.19206.5	controllerType=0 controllerNumber=1 scan=19206	124.041
21721:4	56	R.TGPAATTLPDGAAAESLVESSEVAVIGFFKDVESDSAKQFLQAAEAIDDIPFGITSNSDVFSK.Y			1615.8	4	6460.18	6461.17	-1	2.4	133	Specific	557.13	209.97	209.97	4.09	5	>sp|P07237|PDIA1_HUMAN Protein disulfide-isomerase OS=Homo sapiens GN=P4HB PE=1 SV=3	12780	YJC_160818_PC9mem_AALmnp_G_01.19208.19208.2	controllerType=0 controllerNumber=1 scan=19208	124.055
21722:4	56	R.TGPAATTLPDGAAAESLVESSEVAVIGFFKDVESDSAKQFLQ[+0.984]AAEAIDDIPFGITSNSDVFSK.Y		Q[+1]	1616.55	4	6463.18	6462.16	1	2.5	133	Specific	502.57	151.92	7.7	3.35	5	>sp|P07237|PDIA1_HUMAN Protein disulfide-isomerase OS=Homo sapiens GN=P4HB PE=1 SV=3	12780	YJC_160818_PC9mem_AALmnp_G_01.19208.19208.2	controllerType=0 controllerNumber=1 scan=19208	124.055
09990:3	56	K.FLESGGQDGAGDDDDLEDLEEAEEPDMEEDDDQKAVKDEL.-			1471.6	3	4412.79	4412.8	0	-2.2	469	CRagged	616.95	527.73	175.17	9.61	5	>sp|P07237|PDIA1_HUMAN Protein disulfide-isomerase OS=Homo sapiens GN=P4HB PE=1 SV=3	12780	YJC_160818_PC9mem_AALmnp_G_01.8691.8691.3	controllerType=0 controllerNumber=1 scan=8691	57.0214
10012:4	56	K.FLESGGQDGAGDDDDLEDLEEAEEPDMEEDDDQKAVKDEL.-			1103.95	4	4412.8	4412.8	0	-0.7	469	CRagged	795.42	795.42	271.75	11.9	5	>sp|P07237|PDIA1_HUMAN Protein disulfide-isomerase OS=Homo sapiens GN=P4HB PE=1 SV=3	12780	YJC_160818_PC9mem_AALmnp_G_01.8710.8710.4	controllerType=0 controllerNumber=1 scan=8710	57.1223
23060:3	56	K.FLESGGQDGAGDDDDLEDLEEAEEPDMEEDDDQKAVKDEL.-			1471.61	3	4412.82	4412.8	0	4.4	469	CRagged	842.22	591.5	100.16	13.15	5	>sp|P07237|PDIA1_HUMAN Protein disulfide-isomerase OS=Homo sapiens GN=P4HB PE=1 SV=3	12780	YJC_160818_PC9mem_AALmnp_G_01.21345.21345.3	controllerType=0 controllerNumber=1 scan=21345	145.252
10011:4	56	K.FLESGGQDGAGDDDDLEDLEEAEEPDMEEDDDQKAVKDEL.-			1103.95	4	4412.8	4412.8	0	-0.7	469	CRagged	866.87	615.72	256.38	13.9	5	>sp|P07237|PDIA1_HUMAN Protein disulfide-isomerase OS=Homo sapiens GN=P4HB PE=1 SV=3	12780	YJC_160818_PC9mem_AALmnp_G_01.8709.8709.4	controllerType=0 controllerNumber=1 scan=8709	57.1166
09989:3	56	K.FLESGGQDGAGDDDDLEDLEEAEEPDMEEDDDQKAVKDEL.-			1471.6	3	4412.79	4412.8	0	-2.2	469	CRagged	1087.56	711.78	163.7	18.61	5	>sp|P07237|PDIA1_HUMAN Protein disulfide-isomerase OS=Homo sapiens GN=P4HB PE=1 SV=3	12780	YJC_160818_PC9mem_AALmnp_G_01.8690.8690.3	controllerType=0 controllerNumber=1 scan=8690	57.019
23099:3	56	K.FLESGGQDGAGDDDDLEDLEEAEEPDM[+15.995]EEDDDQKAVKDEL.-		M[+16]	1476.95	3	4428.82	4428.8	0	6.6	469	CRagged	328.38	103.98	103.98	1.06	5	>sp|P07237|PDIA1_HUMAN Protein disulfide-isomerase OS=Homo sapiens GN=P4HB PE=1 SV=3	12780	YJC_160818_PC9mem_AALmnp_G_01.21373.21373.3	controllerType=0 controllerNumber=1 scan=21373	145.406
09467:3	56	K.FLESGGQDGAGDDDDLEDLEEAEEPDM[+15.995]EEDDDQKAVKDEL.-		M[+16]	1476.93	3	4428.77	4428.8	0	-4.8	469	CRagged	480.26	398.59	103.2	6.77	5	>sp|P07237|PDIA1_HUMAN Protein disulfide-isomerase OS=Homo sapiens GN=P4HB PE=1 SV=3	12780	YJC_160818_PC9mem_AALmnp_G_01.8272.8272.3	controllerType=0 controllerNumber=1 scan=8272	54.5599
09469:4	56	K.FLESGGQDGAGDDDDLEDLEEAEEPDM[+15.995]EEDDDQKAVKDEL.-		M[+16]	1107.95	4	4428.78	4428.8	0	-3.6	469	CRagged	709.81	430.37	218.81	10.32	5	>sp|P07237|PDIA1_HUMAN Protein disulfide-isomerase OS=Homo sapiens GN=P4HB PE=1 SV=3	12780	YJC_160818_PC9mem_AALmnp_G_01.8274.8274.4	controllerType=0 controllerNumber=1 scan=8274	54.5729
09470:4	56	K.FLESGGQDGAGDDDDLEDLEEAEEPDM[+15.995]EEDDDQKAVKDEL.-		M[+16]	1107.95	4	4428.78	4428.8	0	-3.6	469	CRagged	913.83	824.24	211.15	14.98	5	>sp|P07237|PDIA1_HUMAN Protein disulfide-isomerase OS=Homo sapiens GN=P4HB PE=1 SV=3	12780	YJC_160818_PC9mem_AALmnp_G_01.8275.8275.4	controllerType=0 controllerNumber=1 scan=8275	54.5796
09465:3	56	K.FLESGGQDGAGDDDDLEDLEEAEEPDM[+15.995]EEDDDQKAVKDEL.-		M[+16]	1476.93	3	4428.77	4428.8	0	-4.8	469	CRagged	1086.99	812.32	115.77	18.36	5	>sp|P07237|PDIA1_HUMAN Protein disulfide-isomerase OS=Homo sapiens GN=P4HB PE=1 SV=3	12780	YJC_160818_PC9mem_AALmnp_G_01.8271.8271.3	controllerType=0 controllerNumber=1 scan=8271	54.5541
20251:5	57	R.LLQHMDETVSFHATDLQMLVLDEADRILDMGFADTMNAVIENLPK.K			1020.7	5	5099.49	5100.48	-1	2.3	201	Specific	463.4	119.9	119.9	2.86	6	>sp|Q13206|DDX10_HUMAN Probable ATP-dependent RNA helicase DDX10 OS=Homo sapiens GN=DDX10 PE=1 SV=2	4426	YJC_160818_PC9mem_AALmnp_G_01.17915.17915.5	controllerType=0 controllerNumber=1 scan=17915	115.063
20253:5	57	R.LLQHMDETVSFHATDLQMLVLDEADRILDMGFADTMNAVIENLPK.K			1020.7	5	5099.49	5100.48	-1	2.3	201	Specific	616.2	605.5	605.5	9.16	6	>sp|Q13206|DDX10_HUMAN Probable ATP-dependent RNA helicase DDX10 OS=Homo sapiens GN=DDX10 PE=1 SV=2	4426	YJC_160818_PC9mem_AALmnp_G_01.17916.17916.5	controllerType=0 controllerNumber=1 scan=17916	115.07
02435:4	57	K.RLEGTEHRQDNDTGNEEQEEEEDDEEEMEEK.L			945.378	4	3778.49	3778.5	0	-2.9	565	Specific	403.58	203.23	203.23	3.72	6	>sp|Q13206|DDX10_HUMAN Probable ATP-dependent RNA helicase DDX10 OS=Homo sapiens GN=DDX10 PE=1 SV=2	4426	YJC_160818_PC9mem_AALmnp_G_01.2799.2799.4	controllerType=0 controllerNumber=1 scan=2799	22.0381
02437:4	57	K.RLEGTEHRQDNDTGNEEQEEEEDDEEEMEEK.L			945.378	4	3778.49	3778.5	0	-2.9	565	Specific	863.85	780.25	780.25	14.49	6	>sp|Q13206|DDX10_HUMAN Probable ATP-dependent RNA helicase DDX10 OS=Homo sapiens GN=DDX10 PE=1 SV=2	4426	YJC_160818_PC9mem_AALmnp_G_01.2800.2800.4	controllerType=0 controllerNumber=1 scan=2800	22.0443
01667:4	57	K.RLEGTEHRQDNDTGNEEQEEEEDDEEEM[+15.995]EEK.L		M[+16]	949.383	4	3794.51	3794.5	0	3.2	565	Specific	241.69	59.5	59.5	0.57	6	>sp|Q13206|DDX10_HUMAN Probable ATP-dependent RNA helicase DDX10 OS=Homo sapiens GN=DDX10 PE=1 SV=2	4426	YJC_160818_PC9mem_AALmnp_G_01.2246.2246.6	controllerType=0 controllerNumber=1 scan=2246	18.8267
07327:4	57	R.LEGTEHRQDN[+1387.512]DTGNEEQEEEEDDEEEMEEK.L	HexNAc(3)Hex(3)Fuc(2)	N[+1388]	1253.48	4	5010.9	5009.91	1	-2.6	566	Specific	336.8	16.68	16.68	1.03	6	>sp|Q13206|DDX10_HUMAN Probable ATP-dependent RNA helicase DDX10 OS=Homo sapiens GN=DDX10 PE=1 SV=2	4426	YJC_160818_PC9mem_AALmnp_G_01.6561.6561.4	controllerType=0 controllerNumber=1 scan=6561	44.4519
05449:4	57	R.LEGTEHRQDNDTGNEEQEEEEDDEEEMEEKLAK.A			984.406	4	3934.6	3934.62	0	-3.1	566	Specific	904.4	682.95	682.95	15.32	6	>sp|Q13206|DDX10_HUMAN Probable ATP-dependent RNA helicase DDX10 OS=Homo sapiens GN=DDX10 PE=1 SV=2	4426	YJC_160818_PC9mem_AALmnp_G_01.5142.5142.4	controllerType=0 controllerNumber=1 scan=5142	35.8173
05450:4	57	R.LEGTEHRQDNDTGNEEQEEEEDDEEEMEEKLAK.A			984.406	4	3934.6	3934.62	0	-3.1	566	Specific	1333.29	1188.84	1188.84	23.32	6	>sp|Q13206|DDX10_HUMAN Probable ATP-dependent RNA helicase DDX10 OS=Homo sapiens GN=DDX10 PE=1 SV=2	4426	YJC_160818_PC9mem_AALmnp_G_01.5143.5143.4	controllerType=0 controllerNumber=1 scan=5143	35.8233
12665:3	58	R.SSWVMTC[+57.021]AYAPSGNYVAC[+57.021]GGLDNIC[+57.021]SIYNLK.T		C[+57]*3	1157.85	3	3471.54	3471.55	0	-1.2	97	Specific	601.97	508.77	508.77	9.05	4	>sp|P62873|GBB1_HUMAN Guanine nucleotide-binding protein G(I)/G(S)/G(T) subunit beta-1 OS=Homo sapiens GN=GNB1 PE=1 SV=3	6552	YJC_160818_PC9mem_AALmnp_G_01.10962.10962.3	controllerType=0 controllerNumber=1 scan=10962	70.4243
12663:3	58	R.SSWVMTC[+57.021]AYAPSGNYVAC[+57.021]GGLDNIC[+57.021]SIYNLK.T		C[+57]*3	1157.85	3	3471.54	3471.55	0	-1.2	97	Specific	756.21	475.07	475.07	11.58	4	>sp|P62873|GBB1_HUMAN Guanine nucleotide-binding protein G(I)/G(S)/G(T) subunit beta-1 OS=Homo sapiens GN=GNB1 PE=1 SV=3	6552	YJC_160818_PC9mem_AALmnp_G_01.10961.10961.3	controllerType=0 controllerNumber=1 scan=10961	70.4177
13297:4	58	R.LFDLRADQELMTYSHDNIIC[+57.021]GITSVSFSK.S		C[+57]	840.906	4	3360.6	3360.62	0	-6.9	252	Specific	322.02	90.19	90.19	2.25	4	>sp|P62873|GBB1_HUMAN Guanine nucleotide-binding protein G(I)/G(S)/G(T) subunit beta-1 OS=Homo sapiens GN=GNB1 PE=1 SV=3	6552	YJC_160818_PC9mem_AALmnp_G_01.11506.11506.4	controllerType=0 controllerNumber=1 scan=11506	73.775
13298:4	58	R.LFDLRADQELMTYSHDNIIC[+57.021]GITSVSFSK.S		C[+57]	840.906	4	3360.6	3360.62	0	-6.9	252	Specific	745.92	683.59	683.59	11.3	4	>sp|P62873|GBB1_HUMAN Guanine nucleotide-binding protein G(I)/G(S)/G(T) subunit beta-1 OS=Homo sapiens GN=GNB1 PE=1 SV=3	6552	YJC_160818_PC9mem_AALmnp_G_01.11507.11507.4	controllerType=0 controllerNumber=1 scan=11507	73.7809
11195:3	58	R.ADQELMTYSHDNIIC[+57.021]GITSVSFSK.S		C[+57]	906.088	3	2716.25	2716.26	0	-3.9	257	Specific	622.76	413.23	413.23	9.49	4	>sp|P62873|GBB1_HUMAN Guanine nucleotide-binding protein G(I)/G(S)/G(T) subunit beta-1 OS=Homo sapiens GN=GNB1 PE=1 SV=3	6552	YJC_160818_PC9mem_AALmnp_G_01.9697.9697.3	controllerType=0 controllerNumber=1 scan=9697	62.9121
11196:3	58	R.ADQELMTYSHDNIIC[+57.021]GITSVSFSK.S		C[+57]	906.088	3	2716.25	2716.26	0	-3.9	257	Specific	873.37	827.41	827.41	14.87	4	>sp|P62873|GBB1_HUMAN Guanine nucleotide-binding protein G(I)/G(S)/G(T) subunit beta-1 OS=Homo sapiens GN=GNB1 PE=1 SV=3	6552	YJC_160818_PC9mem_AALmnp_G_01.9698.9698.3	controllerType=0 controllerNumber=1 scan=9698	62.9179
10443:3	58	R.ADQELM[+15.995]TYSHDNIIC[+57.021]GITSVSFSK.S		C[+57], M[+16]	911.422	3	2732.25	2732.25	0	-0.8	257	Specific	378.46	89.86	89.86	2.5	4	>sp|P62873|GBB1_HUMAN Guanine nucleotide-binding protein G(I)/G(S)/G(T) subunit beta-1 OS=Homo sapiens GN=GNB1 PE=1 SV=3	6552	YJC_160818_PC9mem_AALmnp_G_01.9064.9064.3	controllerType=0 controllerNumber=1 scan=9064	59.2979
10445:3	58	R.ADQELM[+15.995]TYSHDNIIC[+57.021]GITSVSFSK.S		C[+57], M[+16]	911.422	3	2732.25	2732.25	0	-0.8	257	Specific	571.72	521.64	521.64	7.87	4	>sp|P62873|GBB1_HUMAN Guanine nucleotide-binding protein G(I)/G(S)/G(T) subunit beta-1 OS=Homo sapiens GN=GNB1 PE=1 SV=3	6552	YJC_160818_PC9mem_AALmnp_G_01.9065.9065.3	controllerType=0 controllerNumber=1 scan=9065	59.302
13949:3	59	R.YFAGNLASGGAAGATSLC[+57.021]FVYPLDFAR.T		C[+57]	932.787	3	2796.35	2796.34	0	1	112	Specific	271.04	72.35	72.35	0.93	5	>sp|P12236|ADT3_HUMAN ADP/ATP translocase 3 OS=Homo sapiens GN=SLC25A6 PE=1 SV=4	515	YJC_160818_PC9mem_AALmnp_G_01.12067.12067.3	controllerType=0 controllerNumber=1 scan=12067	77.1432
13951:3	59	R.YFAGNLASGGAAGATSLC[+57.021]FVYPLDFAR.T		C[+57]	932.787	3	2796.35	2796.34	0	1	112	Specific	513.83	435.07	435.07	6.21	5	>sp|P12236|ADT3_HUMAN ADP/ATP translocase 3 OS=Homo sapiens GN=SLC25A6 PE=1 SV=4	515	YJC_160818_PC9mem_AALmnp_G_01.12068.12068.3	controllerType=0 controllerNumber=1 scan=12068	77.1467
19317:3	59	K.GMLPDPKNTHIVVSWMIAQTVTAVAGVVSYPFDTVR.R			1300.68	3	3900.03	3900.02	0	2.4	200	Specific	589.97	288.47	288.47	6.19	5	>sp|P12236|ADT3_HUMAN ADP/ATP translocase 3 OS=Homo sapiens GN=SLC25A6 PE=1 SV=4	515	YJC_160818_PC9mem_AALmnp_G_01.17057.17057.3	controllerType=0 controllerNumber=1 scan=17057	109.184
19319:3	59	K.GMLPDPKNTHIVVSWMIAQTVTAVAGVVSYPFDTVR.R			1300.68	3	3900.03	3900.02	0	2.4	200	Specific	696	696	696	10.21	5	>sp|P12236|ADT3_HUMAN ADP/ATP translocase 3 OS=Homo sapiens GN=SLC25A6 PE=1 SV=4	515	YJC_160818_PC9mem_AALmnp_G_01.17058.17058.3	controllerType=0 controllerNumber=1 scan=17058	109.187
19295:4	59	K.GMLPDPKNTHIVVSWMIAQ[+0.984]TVTAVAGVVSYPFDTVR.R		Q[+1]	976.01	4	3901.02	3901	0	4.3	200	Specific	603.94	546.46	158.99	9.34	5	>sp|P12236|ADT3_HUMAN ADP/ATP translocase 3 OS=Homo sapiens GN=SLC25A6 PE=1 SV=4	515	YJC_160818_PC9mem_AALmnp_G_01.17042.17042.4	controllerType=0 controllerNumber=1 scan=17042	109.082
18623:5	59	K.GMLPDPKNTHIVVSWMIAQTVTAVAGVVSYPFDTVRR.R			812.024	5	4056.09	4056.12	0	-6.5	200	Specific	897.28	746.26	137.55	14.13	5	>sp|P12236|ADT3_HUMAN ADP/ATP translocase 3 OS=Homo sapiens GN=SLC25A6 PE=1 SV=4	515	YJC_160818_PC9mem_AALmnp_G_01.16458.16458.5	controllerType=0 controllerNumber=1 scan=16458	105.144
18627:4	59	K.GMLPDPKNTHIVVSWMIAQTVTAVAGVVSYPFDTVRR.R			1014.79	4	4056.13	4056.12	0	1.7	200	Specific	999.06	890.88	275.47	16.05	5	>sp|P12236|ADT3_HUMAN ADP/ATP translocase 3 OS=Homo sapiens GN=SLC25A6 PE=1 SV=4	515	YJC_160818_PC9mem_AALmnp_G_01.16460.16460.4	controllerType=0 controllerNumber=1 scan=16460	105.153
17829:4	59	K.NTHIVVSWMIAQTVTAVAGVVSYPFDTVRR.R			830.189	4	3317.74	3317.75	0	-3	207	Specific	907.94	863.37	863.37	15.9	5	>sp|P12236|ADT3_HUMAN ADP/ATP translocase 3 OS=Homo sapiens GN=SLC25A6 PE=1 SV=4	515	YJC_160818_PC9mem_AALmnp_G_01.15743.15743.4	controllerType=0 controllerNumber=1 scan=15743	100.438
07049:5	60	K.LKDLGHPVEEEDELESGDQEDEDDESEDPGKDLDHI.-			816.35	5	4077.72	4077.73	0	-2.4	927	CRagged	623.15	456.87	178.44	9.33	2	>sp|O60763|USO1_HUMAN General vesicular transport factor p115 OS=Homo sapiens GN=USO1 PE=1 SV=2	18732	YJC_160818_PC9mem_AALmnp_G_01.6353.6353.5	controllerType=0 controllerNumber=1 scan=6353	43.2867
07050:5	60	K.LKDLGHPVEEEDELESGDQEDEDDESEDPGKDLDHI.-			816.35	5	4077.72	4077.73	0	-2.4	927	CRagged	765.69	745.88	145.54	12.73	2	>sp|O60763|USO1_HUMAN General vesicular transport factor p115 OS=Homo sapiens GN=USO1 PE=1 SV=2	18732	YJC_160818_PC9mem_AALmnp_G_01.6354.6354.5	controllerType=0 controllerNumber=1 scan=6354	43.2926
06999:4	60	K.LKDLGHPVEEEDELESGDQEDEDDESEDPGKDLDHI.-			1020.19	4	4077.72	4077.73	0	-2.4	927	CRagged	936	701.03	311.11	15.47	2	>sp|O60763|USO1_HUMAN General vesicular transport factor p115 OS=Homo sapiens GN=USO1 PE=1 SV=2	18732	YJC_160818_PC9mem_AALmnp_G_01.6315.6315.4	controllerType=0 controllerNumber=1 scan=6315	43.0548
07000:4	60	K.LKDLGHPVEEEDELESGDQEDEDDESEDPGKDLDHI.-			1020.19	4	4077.72	4077.73	0	-2.4	927	CRagged	1554.45	1449.03	332.57	28.47	2	>sp|O60763|USO1_HUMAN General vesicular transport factor p115 OS=Homo sapiens GN=USO1 PE=1 SV=2	18732	YJC_160818_PC9mem_AALmnp_G_01.6316.6316.4	controllerType=0 controllerNumber=1 scan=6316	43.0581
07678:4	60	K.DLGHPVEEEDELESGDQEDEDDESEDPGKDLDHI.-			959.894	4	3836.55	3836.55	0	0.2	929	CRagged	629	411.39	411.39	8.88	2	>sp|O60763|USO1_HUMAN General vesicular transport factor p115 OS=Homo sapiens GN=USO1 PE=1 SV=2	18732	YJC_160818_PC9mem_AALmnp_G_01.6867.6867.4	controllerType=0 controllerNumber=1 scan=6867	46.3285
07680:4	60	K.DLGHPVEEEDELESGDQEDEDDESEDPGKDLDHI.-			959.894	4	3836.55	3836.55	0	0.2	929	CRagged	914.66	835.08	835.08	15.5	2	>sp|O60763|USO1_HUMAN General vesicular transport factor p115 OS=Homo sapiens GN=USO1 PE=1 SV=2	18732	YJC_160818_PC9mem_AALmnp_G_01.6868.6868.4	controllerType=0 controllerNumber=1 scan=6868	46.3316
19937:4	61	K.SGDLYVLAADKVASVASTLETTFETISTLSGVDLENGTC[+57.021]SHPLIPDK.A		C[+57]	1231.62	4	4923.45	4922.45	1	-1.1	326	Specific	942.38	460.9	36.79	15.62	4	>sp|Q9NSE4|SYIM_HUMAN Isoleucine--tRNA ligase, mitochondrial OS=Homo sapiens GN=IARS2 PE=1 SV=2	16806	YJC_160818_PC9mem_AALmnp_G_01.17633.17633.2	controllerType=0 controllerNumber=1 scan=17633	113.131
18818:5	61	K.SGDLYVLAADKVASVASTLETTFETISTLSGVDLENGTC[+57.021]SHPLIPDKASPLLPANHVTMAK.G		C[+57]	1271.45	5	6353.21	6353.22	0	-1.4	326	Specific	632.09	211.69	57.71	7.22	4	>sp|Q9NSE4|SYIM_HUMAN Isoleucine--tRNA ligase, mitochondrial OS=Homo sapiens GN=IARS2 PE=1 SV=2	16806	YJC_160818_PC9mem_AALmnp_G_01.16634.16634.5	controllerType=0 controllerNumber=1 scan=16634	106.317
18820:5	61	K.SGDLYVLAADKVASVASTLETTFETISTLSGVDLENGTC[+57.021]SHPLIPDKASPLLPANHVTMAK.G		C[+57]	1271.45	5	6353.21	6353.22	0	-1.4	326	Specific	1109.01	1109.01	269.92	19.48	4	>sp|Q9NSE4|SYIM_HUMAN Isoleucine--tRNA ligase, mitochondrial OS=Homo sapiens GN=IARS2 PE=1 SV=2	16806	YJC_160818_PC9mem_AALmnp_G_01.16635.16635.5	controllerType=0 controllerNumber=1 scan=16635	106.323
18933:6	61	K.SGDLYVLAADKVASVASTLETTFETISTLSGVDLEN[+0.984]GTC[+57.021]SHPLIPDKASPLLPANHVTMAK.G		C[+57], N[+1]	1060.04	6	6355.2	6354.2	1	-1.2	326	Specific	522.38	452.74	201.9	7.43	4	>sp|Q9NSE4|SYIM_HUMAN Isoleucine--tRNA ligase, mitochondrial OS=Homo sapiens GN=IARS2 PE=1 SV=2	16806	YJC_160818_PC9mem_AALmnp_G_01.16736.16736.3	controllerType=0 controllerNumber=1 scan=16736	107.017
21878:4	61	K.VITVIEPGLLFEIIEMLQSEETSSTSQLNELMMASESTLLAQEPR.E			1252.63	4	5007.52	5007.51	0	0.9	903	Specific	721.74	642.78	47.71	10.58	4	>sp|Q9NSE4|SYIM_HUMAN Isoleucine--tRNA ligase, mitochondrial OS=Homo sapiens GN=IARS2 PE=1 SV=2	16806	YJC_160818_PC9mem_AALmnp_G_01.19326.19326.4	controllerType=0 controllerNumber=1 scan=19326	124.801
21876:4	61	K.VITVIEPGLLFEIIEMLQSEETSSTSQLNELMMASESTLLAQEPR.E			1252.63	4	5007.52	5007.51	0	0.9	903	Specific	736.78	347.11	24.32	9.01	4	>sp|Q9NSE4|SYIM_HUMAN Isoleucine--tRNA ligase, mitochondrial OS=Homo sapiens GN=IARS2 PE=1 SV=2	16806	YJC_160818_PC9mem_AALmnp_G_01.19325.19325.4	controllerType=0 controllerNumber=1 scan=19325	124.794
10045:3	62	K.TVEEVLGHFGVNESTGLSLEQVKK.L			867.458	3	2600.36	2600.36	0	1.6	8	Specific	877.98	584.4	584.4	14.32	5	>sp|P16615|AT2A2_HUMAN Sarcoplasmic/endoplasmic reticulum calcium ATPase 2 OS=Homo sapiens GN=ATP2A2 PE=1 SV=1	1275	YJC_160818_PC9mem_AALmnp_G_01.8732.8732.3	controllerType=0 controllerNumber=1 scan=8732	57.2405
10047:3	62	K.TVEEVLGHFGVNESTGLSLEQVKK.L			867.458	3	2600.36	2600.36	0	1.6	8	Specific	954.54	789.77	789.77	16.32	5	>sp|P16615|AT2A2_HUMAN Sarcoplasmic/endoplasmic reticulum calcium ATPase 2 OS=Homo sapiens GN=ATP2A2 PE=1 SV=1	1275	YJC_160818_PC9mem_AALmnp_G_01.8733.8733.3	controllerType=0 controllerNumber=1 scan=8733	57.2438
13402:7	62	R.MFILDRVEGDTC[+57.021]SLNEFTITGSTYAPIGEVHKDDKPVNC[+57.021]HQYDGLVELATIC[+57.021]ALC[+57.021]NDSALDYNEAK.G		C[+57]*4	1071.5	7	7494.46	7493.47	1	-2.1	366	Specific	738.16	478.99	31.03	11.55	5	>sp|P16615|AT2A2_HUMAN Sarcoplasmic/endoplasmic reticulum calcium ATPase 2 OS=Homo sapiens GN=ATP2A2 PE=1 SV=1	1275	YJC_160818_PC9mem_AALmnp_G_01.11585.11585.7	controllerType=0 controllerNumber=1 scan=11585	74.2289
13400:7	62	R.MFILDRVEGDTC[+57.021]SLNEFTITGSTYAPIGEVHKDDKPVNC[+57.021]HQYDGLVELATIC[+57.021]ALC[+57.021]N[+0.984]DSALDYNEAK.G		C[+57]*4, N[+1]	1071.5	7	7494.46	7494.45	0	0.5	366	Specific	597.55	59.66	16.16	3.71	5	>sp|P16615|AT2A2_HUMAN Sarcoplasmic/endoplasmic reticulum calcium ATPase 2 OS=Homo sapiens GN=ATP2A2 PE=1 SV=1	1275	YJC_160818_PC9mem_AALmnp_G_01.11584.11584.7	controllerType=0 controllerNumber=1 scan=11584	74.2263
13197:4	62	R.EEMHLEDSANFIKYETNLTFVGC[+57.021]VGMLDPPRIEVASSVK.L		C[+57]	1107.3	4	4426.17	4426.14	0	6.2	573	Specific	690.37	322.49	322.49	8.02	5	>sp|P16615|AT2A2_HUMAN Sarcoplasmic/endoplasmic reticulum calcium ATPase 2 OS=Homo sapiens GN=ATP2A2 PE=1 SV=1	1275	YJC_160818_PC9mem_AALmnp_G_01.11421.11421.4	controllerType=0 controllerNumber=1 scan=11421	73.2538
13206:5	62	R.EEMHLEDSANFIKYETNLTFVGC[+57.021]VGMLDPPRIEVASSVK.L		C[+57]	886.03	5	4426.12	4426.14	0	-4	573	Specific	733.44	673.59	91.59	11.52	5	>sp|P16615|AT2A2_HUMAN Sarcoplasmic/endoplasmic reticulum calcium ATPase 2 OS=Homo sapiens GN=ATP2A2 PE=1 SV=1	1275	YJC_160818_PC9mem_AALmnp_G_01.11429.11429.5	controllerType=0 controllerNumber=1 scan=11429	73.3059
13199:4	62	R.EEMHLEDSANFIKYETNLTFVGC[+57.021]VGMLDPPRIEVASSVK.L		C[+57]	1107.3	4	4426.17	4426.14	0	6.2	573	Specific	787.18	683.37	683.37	11.59	5	>sp|P16615|AT2A2_HUMAN Sarcoplasmic/endoplasmic reticulum calcium ATPase 2 OS=Homo sapiens GN=ATP2A2 PE=1 SV=1	1275	YJC_160818_PC9mem_AALmnp_G_01.11422.11422.4	controllerType=0 controllerNumber=1 scan=11422	73.2568
13762:3	62	K.IVEFLQSFDEITAMTGDGVNDAPALKK.A			970.489	3	2909.45	2909.46	0	-2.2	686	Specific	512.15	308.82	308.82	5.83	5	>sp|P16615|AT2A2_HUMAN Sarcoplasmic/endoplasmic reticulum calcium ATPase 2 OS=Homo sapiens GN=ATP2A2 PE=1 SV=1	1275	YJC_160818_PC9mem_AALmnp_G_01.11904.11904.3	controllerType=0 controllerNumber=1 scan=11904	76.1938
13764:3	62	K.IVEFLQSFDEITAMTGDGVNDAPALKK.A			970.489	3	2909.45	2909.46	0	-2.2	686	Specific	580.18	554.83	554.83	8.9	5	>sp|P16615|AT2A2_HUMAN Sarcoplasmic/endoplasmic reticulum calcium ATPase 2 OS=Homo sapiens GN=ATP2A2 PE=1 SV=1	1275	YJC_160818_PC9mem_AALmnp_G_01.11905.11905.3	controllerType=0 controllerNumber=1 scan=11905	76.1999
22494:5	63	R.TASQGQWGRAWEVDWFSLASVIFLLLFAPFIVYYFIMAC[+57.021]DQYSC[+57.021]ALTGPVVDIVTGHAR.L		C[+57]*2	1349.67	5	6744.34	6743.34	1	-0.5	23	Specific	273.19	273.19	123.05	4.64	3	>sp|Q9UBM7|DHCR7_HUMAN 7-dehydrocholesterol reductase OS=Homo sapiens GN=DHCR7 PE=1 SV=1	4554	YJC_160818_PC9mem_AALmnp_G_01.19814.19814.5	controllerType=0 controllerNumber=1 scan=19814	127.867
22492:5	63	R.TASQGQWGRAWEVDWFSLASVIFLLLFAPFIVYYFIMAC[+57.021]DQYSC[+57.021]ALTGPVVDIVTGHAR.L		C[+57]*2	1349.67	5	6744.34	6743.34	1	-0.5	23	Specific	1052.27	588.14	11.41	18.23	3	>sp|Q9UBM7|DHCR7_HUMAN 7-dehydrocholesterol reductase OS=Homo sapiens GN=DHCR7 PE=1 SV=1	4554	YJC_160818_PC9mem_AALmnp_G_01.19813.19813.5	controllerType=0 controllerNumber=1 scan=19813	127.858
17737:5	63	K.TPPITRKAAQLYTLWVTFQVLLYTSLPDFC[+57.021]HK.F		C[+57]	762.412	5	3808.03	3808.03	0	-0.2	89	Specific	376.53	253.96	253.96	4.15	3	>sp|Q9UBM7|DHCR7_HUMAN 7-dehydrocholesterol reductase OS=Homo sapiens GN=DHCR7 PE=1 SV=1	4554	YJC_160818_PC9mem_AALmnp_G_01.15658.15658.5	controllerType=0 controllerNumber=1 scan=15658	99.864
17739:5	63	K.TPPITRKAAQLYTLWVTFQVLLYTSLPDFC[+57.021]HK.F		C[+57]	762.412	5	3808.03	3808.03	0	-0.2	89	Specific	820.22	820.22	820.22	13.51	3	>sp|Q9UBM7|DHCR7_HUMAN 7-dehydrocholesterol reductase OS=Homo sapiens GN=DHCR7 PE=1 SV=1	4554	YJC_160818_PC9mem_AALmnp_G_01.15659.15659.5	controllerType=0 controllerNumber=1 scan=15659	99.8709
18532:4	63	R.KAAQLYTLWVTFQVLLYTSLPDFC[+57.021]HK.F		C[+57]	786.417	4	3142.64	3142.64	0	0.4	95	Specific	470.84	366.23	366.23	5.78	3	>sp|Q9UBM7|DHCR7_HUMAN 7-dehydrocholesterol reductase OS=Homo sapiens GN=DHCR7 PE=1 SV=1	4554	YJC_160818_PC9mem_AALmnp_G_01.16380.16380.4	controllerType=0 controllerNumber=1 scan=16380	104.617
18534:4	63	R.KAAQLYTLWVTFQVLLYTSLPDFC[+57.021]HK.F		C[+57]	786.417	4	3142.64	3142.64	0	0.4	95	Specific	761.19	718.72	718.72	12.71	3	>sp|Q9UBM7|DHCR7_HUMAN 7-dehydrocholesterol reductase OS=Homo sapiens GN=DHCR7 PE=1 SV=1	4554	YJC_160818_PC9mem_AALmnp_G_01.16381.16381.4	controllerType=0 controllerNumber=1 scan=16381	104.624
10112:5	64	R.ALSQAAVEEEEEEEEEEEPAQGKGDSIEEILADSEDEEDNEEEER.S			1019.42	5	5093.1	5093.12	0	-3.9	1047	Specific	483.6	379.05	27.47	5.4	3	>sp|Q5JTH9|RRP12_HUMAN RRP12-like protein OS=Homo sapiens GN=RRP12 PE=1 SV=2	14911	YJC_160818_PC9mem_AALmnp_G_01.8781.8781.5	controllerType=0 controllerNumber=1 scan=8781	57.5361
10110:5	64	R.ALSQAAVEEEEEEEEEEEPAQGKGDSIEEILADSEDEEDNEEEER.S			1019.42	5	5093.1	5093.12	0	-3.9	1047	Specific	602.75	201.67	19.2	6.15	3	>sp|Q5JTH9|RRP12_HUMAN RRP12-like protein OS=Homo sapiens GN=RRP12 PE=1 SV=2	14911	YJC_160818_PC9mem_AALmnp_G_01.8780.8780.5	controllerType=0 controllerNumber=1 scan=8780	57.5272
10099:4	64	R.ALSQAAVEEEEEEEEEEEPAQGKGDSIEEILADSEDEEDNEEEER.S			1273.78	4	5092.11	5093.12	-1	-1	1047	Specific	830.91	445.93	445.93	12.17	3	>sp|Q5JTH9|RRP12_HUMAN RRP12-like protein OS=Homo sapiens GN=RRP12 PE=1 SV=2	14911	YJC_160818_PC9mem_AALmnp_G_01.8773.8773.4	controllerType=0 controllerNumber=1 scan=8773	57.494
10100:4	64	R.ALSQAAVEEEEEEEEEEEPAQGKGDSIEEILADSEDEEDNEEEER.S			1273.78	4	5092.11	5093.12	-1	-1	1047	Specific	1073.36	912.69	912.69	17.83	3	>sp|Q5JTH9|RRP12_HUMAN RRP12-like protein OS=Homo sapiens GN=RRP12 PE=1 SV=2	14911	YJC_160818_PC9mem_AALmnp_G_01.8774.8774.4	controllerType=0 controllerNumber=1 scan=8774	57.5001
09559:4	64	R.ALSQAAVEEEEEEEEEEEPAQGKGDSIEEILADSEDEEDNEEEERSR.G			1334.82	4	5336.24	5336.25	0	-1.6	1047	Specific	699.03	451.16	51.06	10.15	3	>sp|Q5JTH9|RRP12_HUMAN RRP12-like protein OS=Homo sapiens GN=RRP12 PE=1 SV=2	14911	YJC_160818_PC9mem_AALmnp_G_01.8345.8345.4	controllerType=0 controllerNumber=1 scan=8345	54.985
23091:4	64	R.ALSQAAVEEEEEEEEEEEPAQGKGDSIEEILADSEDEEDNEEEERSR.G			1334.82	4	5336.27	5336.25	0	4.2	1047	Specific	949.61	887.12	226.74	15.2	3	>sp|Q5JTH9|RRP12_HUMAN RRP12-like protein OS=Homo sapiens GN=RRP12 PE=1 SV=2	14911	YJC_160818_PC9mem_AALmnp_G_01.21368.21368.4	controllerType=0 controllerNumber=1 scan=21368	145.381
09560:4	64	R.ALSQAAVEEEEEEEEEEEPAQGKGDSIEEILADSEDEEDNEEEERSR.G			1334.82	4	5336.24	5336.25	0	-1.6	1047	Specific	1301.39	1176.14	272.9	23.54	3	>sp|Q5JTH9|RRP12_HUMAN RRP12-like protein OS=Homo sapiens GN=RRP12 PE=1 SV=2	14911	YJC_160818_PC9mem_AALmnp_G_01.8346.8346.4	controllerType=0 controllerNumber=1 scan=8346	54.9908
23089:4	64	R.ALSQAAVEEEEEEEEEEEPAQ[+0.984]GKGDSIEEILADSEDEEDNEEEERSR.G		Q[+1]	1334.82	4	5336.27	5337.23	-1	7.8	1047	Specific	486.16	97.08	32.21	1.64	3	>sp|Q5JTH9|RRP12_HUMAN RRP12-like protein OS=Homo sapiens GN=RRP12 PE=1 SV=2	14911	YJC_160818_PC9mem_AALmnp_G_01.21367.21367.4	controllerType=0 controllerNumber=1 scan=21367	145.378
21296:6	65	K.IHSLPPEGKLGIMELAVGLTSC[+57.021]FVTFLLPAGWILSHLETYRRPE.-		C[+57]	825.775	6	4949.61	4948.63	1	-2.9	26	CRagged	367.38	124.59	124.59	3.49	3	>sp|P10176|COX8A_HUMAN Cytochrome c oxidase subunit 8A, mitochondrial OS=Homo sapiens GN=COX8A PE=1 SV=2	3640	YJC_160818_PC9mem_AALmnp_G_01.18859.18859.6	controllerType=0 controllerNumber=1 scan=18859	121.626
21234:5	65	K.IHSLPPEGKLGIMELAVGLTSC[+57.021]FVTFLLPAGWILSHLETYRRPE.-		C[+57]	990.53	5	4948.62	4948.63	0	-0.4	26	CRagged	583.36	265.95	265.95	6.24	3	>sp|P10176|COX8A_HUMAN Cytochrome c oxidase subunit 8A, mitochondrial OS=Homo sapiens GN=COX8A PE=1 SV=2	3640	YJC_160818_PC9mem_AALmnp_G_01.18804.18804.5	controllerType=0 controllerNumber=1 scan=18804	121.26
21245:4	65	K.IHSLPPEGKLGIMELAVGLTSC[+57.021]FVTFLLPAGWILSHLETYRRPE.-		C[+57]	1237.91	4	4948.61	4948.63	0	-2.5	26	CRagged	845.71	525.1	525.1	13.11	3	>sp|P10176|COX8A_HUMAN Cytochrome c oxidase subunit 8A, mitochondrial OS=Homo sapiens GN=COX8A PE=1 SV=2	3640	YJC_160818_PC9mem_AALmnp_G_01.18810.18810.4	controllerType=0 controllerNumber=1 scan=18810	121.287
21298:6	65	K.IHSLPPEGKLGIMELAVGLTSC[+57.021]FVTFLLPAGWILSHLETYRRPE.-		C[+57]	825.775	6	4949.61	4948.63	1	-2.9	26	CRagged	915.02	915.02	915.02	15.69	3	>sp|P10176|COX8A_HUMAN Cytochrome c oxidase subunit 8A, mitochondrial OS=Homo sapiens GN=COX8A PE=1 SV=2	3640	YJC_160818_PC9mem_AALmnp_G_01.18860.18860.6	controllerType=0 controllerNumber=1 scan=18860	121.632
21236:5	65	K.IHSLPPEGKLGIMELAVGLTSC[+57.021]FVTFLLPAGWILSHLETYRRPE.-		C[+57]	990.53	5	4948.62	4948.63	0	-0.4	26	CRagged	936.87	936.87	936.87	15.26	3	>sp|P10176|COX8A_HUMAN Cytochrome c oxidase subunit 8A, mitochondrial OS=Homo sapiens GN=COX8A PE=1 SV=2	3640	YJC_160818_PC9mem_AALmnp_G_01.18805.18805.5	controllerType=0 controllerNumber=1 scan=18805	121.266
21247:4	65	K.IHSLPPEGKLGIMELAVGLTSC[+57.021]FVTFLLPAGWILSHLETYRRPE.-		C[+57]	1237.91	4	4948.61	4948.63	0	-2.5	26	CRagged	942.97	942.97	942.97	15.11	3	>sp|P10176|COX8A_HUMAN Cytochrome c oxidase subunit 8A, mitochondrial OS=Homo sapiens GN=COX8A PE=1 SV=2	3640	YJC_160818_PC9mem_AALmnp_G_01.18811.18811.4	controllerType=0 controllerNumber=1 scan=18811	121.291
22167:4	65	K.LGIMELAVGLTSC[+57.021]FVTFLLPAGWILSHLETYRRPE.-		C[+57]	998.282	4	3990.11	3990.1	0	1.2	35	CRagged	453.14	192.73	192.73	3.57	3	>sp|P10176|COX8A_HUMAN Cytochrome c oxidase subunit 8A, mitochondrial OS=Homo sapiens GN=COX8A PE=1 SV=2	3640	YJC_160818_PC9mem_AALmnp_G_01.19527.19527.4	controllerType=0 controllerNumber=1 scan=19527	125.931
22169:4	65	K.LGIMELAVGLTSC[+57.021]FVTFLLPAGWILSHLETYRRPE.-		C[+57]	998.282	4	3990.11	3990.1	0	1.2	35	CRagged	810.16	810.16	810.16	13.39	3	>sp|P10176|COX8A_HUMAN Cytochrome c oxidase subunit 8A, mitochondrial OS=Homo sapiens GN=COX8A PE=1 SV=2	3640	YJC_160818_PC9mem_AALmnp_G_01.19528.19528.4	controllerType=0 controllerNumber=1 scan=19528	125.933
22126:3	65	K.LGIMELAVGLTSC[+57.021]FVTFLLPAGWILSHLETYRRPE.-		C[+57]	1330.71	3	3990.11	3990.1	0	2.8	35	CRagged	953.95	877.73	877.73	16.21	3	>sp|P10176|COX8A_HUMAN Cytochrome c oxidase subunit 8A, mitochondrial OS=Homo sapiens GN=COX8A PE=1 SV=2	3640	YJC_160818_PC9mem_AALmnp_G_01.19501.19501.3	controllerType=0 controllerNumber=1 scan=19501	125.8
22125:3	65	K.LGIMELAVGLTSC[+57.021]FVTFLLPAGWILSHLETYRRPE.-		C[+57]	1330.71	3	3990.11	3990.1	0	2.8	35	CRagged	992.12	721.61	721.61	16.21	3	>sp|P10176|COX8A_HUMAN Cytochrome c oxidase subunit 8A, mitochondrial OS=Homo sapiens GN=COX8A PE=1 SV=2	3640	YJC_160818_PC9mem_AALmnp_G_01.19500.19500.3	controllerType=0 controllerNumber=1 scan=19500	125.798
21706:4	65	K.LGIM[+15.995]ELAVGLTSC[+57.021]FVTFLLPAGWILSHLETYRRPE.-		C[+57], M[+16]	1002.03	4	4005.08	4006.1	-1	-3.1	35	CRagged	411.46	140.35	140.35	3.31	3	>sp|P10176|COX8A_HUMAN Cytochrome c oxidase subunit 8A, mitochondrial OS=Homo sapiens GN=COX8A PE=1 SV=2	3640	YJC_160818_PC9mem_AALmnp_G_01.19196.19196.4	controllerType=0 controllerNumber=1 scan=19196	123.974
21708:4	65	K.LGIM[+15.995]ELAVGLTSC[+57.021]FVTFLLPAGWILSHLETYRRPE.-		C[+57], M[+16]	1002.03	4	4005.08	4006.1	-1	-3.1	35	CRagged	719.71	673.55	673.55	11.44	3	>sp|P10176|COX8A_HUMAN Cytochrome c oxidase subunit 8A, mitochondrial OS=Homo sapiens GN=COX8A PE=1 SV=2	3640	YJC_160818_PC9mem_AALmnp_G_01.19197.19197.4	controllerType=0 controllerNumber=1 scan=19197	123.981
12857:6	66	K.DNFHGLAIFLDTYPNDETTERVFPYISVMVNN[+1460.529]GSLSYDHSKDGR.W	HexNAc(4)Hex(4)	N[+1461]	1083.32	6	6494.89	6494.89	0	0.1	152	Specific	174.22	153.93	31.84	3.08	16	>sp|Q12907|LMAN2_HUMAN Vesicular integral-membrane protein VIP36 OS=Homo sapiens GN=LMAN2 PE=1 SV=1	9480	YJC_160818_PC9mem_AALmnp_G_01.11108.11108.3	controllerType=0 controllerNumber=1 scan=11108	71.2664
13575:5	66	K.DNFHGLAIFLDTYPNDETTERVFPYISVMVNN[+1444.534]GSLSYDHSKDGR.W	HexNAc(4)Hex(3)Fuc(1)	N[+1445]	1296.59	5	6478.9	6478.9	0	0.7	152	Specific	248.57	202.38	93.51	3.74	16	>sp|Q12907|LMAN2_HUMAN Vesicular integral-membrane protein VIP36 OS=Homo sapiens GN=LMAN2 PE=1 SV=1	9480	YJC_160818_PC9mem_AALmnp_G_01.11754.11754.5	controllerType=0 controllerNumber=1 scan=11754	75.2863
13564:6	66	K.DNFHGLAIFLDTYPNDETTERVFPYISVMVNN[+1444.534]GSLSYDHSKDGR.W	HexNAc(4)Hex(3)Fuc(1)	N[+1445]	1080.66	6	6478.91	6478.9	0	2	152	Specific	302.88	226.63	61.25	3.89	16	>sp|Q12907|LMAN2_HUMAN Vesicular integral-membrane protein VIP36 OS=Homo sapiens GN=LMAN2 PE=1 SV=1	9480	YJC_160818_PC9mem_AALmnp_G_01.11744.11744.6	controllerType=0 controllerNumber=1 scan=11744	75.2164
09988:3	66	R.VFPYISVMVNN[+1444.534]GSLSYDHSK.D	HexNAc(4)Hex(3)Fuc(1)	N[+1445]	1234.55	3	3701.62	3701.63	0	-2.2	173	Specific	437.51	373.52	373.52	6.18	16	>sp|Q12907|LMAN2_HUMAN Vesicular integral-membrane protein VIP36 OS=Homo sapiens GN=LMAN2 PE=1 SV=1	9480	YJC_160818_PC9mem_AALmnp_G_01.8689.8689.3	controllerType=0 controllerNumber=1 scan=8689	57.0161
09864:3	66	R.VFPYISVMVNN[+1751.624]GSLSYDHSK.D	HexNAc(4)Hex(4)NeuAc(1)	N[+1752]	1337.25	3	4009.73	4008.72	1	2.5	173	Specific	703.16	532.37	15.63	11.62	16	>sp|Q12907|LMAN2_HUMAN Vesicular integral-membrane protein VIP36 OS=Homo sapiens GN=LMAN2 PE=1 SV=1	9480	YJC_160818_PC9mem_AALmnp_G_01.8584.8584.3	controllerType=0 controllerNumber=1 scan=8584	56.3699
09317:4	66	R.VFPYISVMVNN[+1955.724]GSLSYDHSKDGR.W	HexNAc(5)Hex(4)Fuc(2)	N[+1956]	1136	4	4540.97	4540.97	0	-0.7	173	Specific	197.13	51.78	11.17	1.42	16	>sp|Q12907|LMAN2_HUMAN Vesicular integral-membrane protein VIP36 OS=Homo sapiens GN=LMAN2 PE=1 SV=1	9480	YJC_160818_PC9mem_AALmnp_G_01.8145.8145.4	controllerType=0 controllerNumber=1 scan=8145	53.7636
09712:4	66	R.VFPYISVMVNN[+2205.793]GSLSYDHSKDGR.W	HexNAc(4)Hex(5)Fuc(2)NeuAc(1)	N[+2206]	1198.51	4	4791.03	4791.04	0	-2.6	173	Specific	234.7	80.83	31.76	3.86	16	>sp|Q12907|LMAN2_HUMAN Vesicular integral-membrane protein VIP36 OS=Homo sapiens GN=LMAN2 PE=1 SV=1	9480	YJC_160818_PC9mem_AALmnp_G_01.8456.8456.4	controllerType=0 controllerNumber=1 scan=8456	55.6007
09266:4	66	R.VFPYISVMVNN[+1752.645]GSLSYDHSKDGR.W	HexNAc(4)Hex(4)Fuc(2)	N[+1753]	1085.23	4	4337.89	4337.89	0	-1	173	Specific	351.56	139.99	64.08	3.95	16	>sp|Q12907|LMAN2_HUMAN Vesicular integral-membrane protein VIP36 OS=Homo sapiens GN=LMAN2 PE=1 SV=1	9480	YJC_160818_PC9mem_AALmnp_G_01.8100.8100.4	controllerType=0 controllerNumber=1 scan=8100	53.4628
09314:3	66	R.VFPYISVMVNN[+1647.613]GSLSYDHSKDGR.W	HexNAc(5)Hex(3)Fuc(1)	N[+1648]	1411.63	3	4232.88	4232.86	0	5.6	173	Specific	431.96	232.63	118.77	4.69	16	>sp|Q12907|LMAN2_HUMAN Vesicular integral-membrane protein VIP36 OS=Homo sapiens GN=LMAN2 PE=1 SV=1	9480	YJC_160818_PC9mem_AALmnp_G_01.8142.8142.3	controllerType=0 controllerNumber=1 scan=8142	53.7423
09230:3	66	R.VFPYISVMVNN[+1751.624]GSLSYDHSKDGR.W	HexNAc(4)Hex(4)NeuAc(1)	N[+1752]	1446.63	3	4337.89	4336.87	1	2.9	173	Specific	501.29	293.39	8.11	5.72	16	>sp|Q12907|LMAN2_HUMAN Vesicular integral-membrane protein VIP36 OS=Homo sapiens GN=LMAN2 PE=1 SV=1	9480	YJC_160818_PC9mem_AALmnp_G_01.8068.8068.3	controllerType=0 controllerNumber=1 scan=8068	53.2696
09178:3	66	R.VFPYISVMVNN[+2060.755]GSLSYDHSKDGR.W	HexNAc(4)Hex(5)Fuc(3)	N[+2061]	1549.67	3	4646.99	4646	1	-3.8	173	Specific	553.81	383.95	158.27	7.67	16	>sp|Q12907|LMAN2_HUMAN Vesicular integral-membrane protein VIP36 OS=Homo sapiens GN=LMAN2 PE=1 SV=1	9480	YJC_160818_PC9mem_AALmnp_G_01.8033.8033.3	controllerType=0 controllerNumber=1 scan=8033	53.0936
09334:3	66	R.VFPYISVMVNN[+1444.534]GSLSYDHSKDGR.W	HexNAc(4)Hex(3)Fuc(1)	N[+1445]	1343.93	3	4029.77	4029.78	0	-3	173	Specific	795.72	581.89	152.1	12.74	16	>sp|Q12907|LMAN2_HUMAN Vesicular integral-membrane protein VIP36 OS=Homo sapiens GN=LMAN2 PE=1 SV=1	9480	YJC_160818_PC9mem_AALmnp_G_01.8158.8158.3	controllerType=0 controllerNumber=1 scan=8158	53.8408
07998:4	66	R.VFPYISVM[+15.995]VNN[+1752.645]GSLSYDHSKDGR.W	HexNAc(4)Hex(4)Fuc(2)	M[+16], N[+1753]	1088.98	4	4352.88	4353.88	-1	-0.4	173	Specific	155.5	35.14	35.14	1.48	16	>sp|Q12907|LMAN2_HUMAN Vesicular integral-membrane protein VIP36 OS=Homo sapiens GN=LMAN2 PE=1 SV=1	9480	YJC_160818_PC9mem_AALmnp_G_01.7119.7119.4	controllerType=0 controllerNumber=1 scan=7119	47.7181
10996:5	66	R.VFPYISVMVNN[+1647.613]GSLSYDHSKDGRWTELAGC[+57.021]TADFR.N	HexNAc(5)Hex(3)Fuc(1)	C[+57], N[+1648]	1128.9	5	5640.47	5640.48	0	-1.7	173	Specific	166.81	135.32	80.1	2.17	16	>sp|Q12907|LMAN2_HUMAN Vesicular integral-membrane protein VIP36 OS=Homo sapiens GN=LMAN2 PE=1 SV=1	9480	YJC_160818_PC9mem_AALmnp_G_01.9547.9547.5	controllerType=0 controllerNumber=1 scan=9547	62.1273
11004:5	66	R.VFPYISVMVNN[+1444.534]GSLSYDHSKDGRWTELAGC[+57.021]TADFR.N	HexNAc(4)Hex(3)Fuc(1)	C[+57], N[+1445]	1088.09	5	5436.4	5437.4	-1	0.4	173	Specific	229.73	153.79	153.79	3.72	16	>sp|Q12907|LMAN2_HUMAN Vesicular integral-membrane protein VIP36 OS=Homo sapiens GN=LMAN2 PE=1 SV=1	9480	YJC_160818_PC9mem_AALmnp_G_01.9553.9553.5	controllerType=0 controllerNumber=1 scan=9553	62.1616
10915:3	67	R.TVSLGAGAKDELHIVEAEAMN[+0.984]YEGSPIK.V		N[+1]	977.494	3	2930.47	2930.45	0	8	46	Specific	308.87	41.99	41.99	0.54	3	>sp|P06748|NPM_HUMAN Nucleophosmin OS=Homo sapiens GN=NPM1 PE=1 SV=2	11500	YJC_160818_PC9mem_AALmnp_G_01.9455.9455.3	controllerType=0 controllerNumber=1 scan=9455	61.5488
10917:3	67	R.TVSLGAGAKDELHIVEAEAMN[+0.984]YEGSPIK.V		N[+1]	977.494	3	2930.47	2930.45	0	8	46	Specific	403.09	324.5	324.5	4.52	3	>sp|P06748|NPM_HUMAN Nucleophosmin OS=Homo sapiens GN=NPM1 PE=1 SV=2	11500	YJC_160818_PC9mem_AALmnp_G_01.9456.9456.3	controllerType=0 controllerNumber=1 scan=9456	61.5549
09780:4	67	K.VKLAADEDDDDDDEEDDDEDDDDDDFDDEEAEEKAPVK.K			1086.9	4	4344.59	4345.62	-1	-4.9	156	Specific	768.41	701.01	701.01	12.2	3	>sp|P06748|NPM_HUMAN Nucleophosmin OS=Homo sapiens GN=NPM1 PE=1 SV=2	11500	YJC_160818_PC9mem_AALmnp_G_01.8513.8513.4	controllerType=0 controllerNumber=1 scan=8513	55.9338
09779:4	67	K.VKLAADEDDDDDDEEDDDEDDDDDDFDDEEAEEKAPVK.K			1086.9	4	4344.59	4345.62	-1	-4.9	156	Specific	1031.84	755.01	755.01	17.2	3	>sp|P06748|NPM_HUMAN Nucleophosmin OS=Homo sapiens GN=NPM1 PE=1 SV=2	11500	YJC_160818_PC9mem_AALmnp_G_01.8512.8512.4	controllerType=0 controllerNumber=1 scan=8512	55.9267
14189:4	67	K.LAADEDDDDDDEEDDDEDDDDDDFDDEEAEEKAPVKK.S			1062.4	4	4246.56	4246.55	0	2.9	158	Specific	181.26	181.26	181.26	2.78	3	>sp|P06748|NPM_HUMAN Nucleophosmin OS=Homo sapiens GN=NPM1 PE=1 SV=2	11500	YJC_160818_PC9mem_AALmnp_G_01.12291.12291.2	controllerType=0 controllerNumber=1 scan=12291	78.5049
07853:3	67	K.LAADEDDDDDDEEDDDEDDDDDDFDDEEAEEKAPVKK.S			1416.19	3	4246.54	4246.55	0	-2.2	158	Specific	243.84	207.56	207.56	4.86	3	>sp|P06748|NPM_HUMAN Nucleophosmin OS=Homo sapiens GN=NPM1 PE=1 SV=2	11500	YJC_160818_PC9mem_AALmnp_G_01.7009.7009.3	controllerType=0 controllerNumber=1 scan=7009	47.1059
05752:3	67	K.LAADEDDDDDDEEDDDEDDDDDDFDDEEAEEKAPVKK.S			1415.85	3	4245.53	4246.55	-1	-5.1	158	Specific	359.86	294.61	294.61	4.62	3	>sp|P06748|NPM_HUMAN Nucleophosmin OS=Homo sapiens GN=NPM1 PE=1 SV=2	11500	YJC_160818_PC9mem_AALmnp_G_01.5365.5365.3	controllerType=0 controllerNumber=1 scan=5365	37.21
09069:3	67	K.LAADEDDDDDDEEDDDEDDDDDDFDDEEAEEKAPVKK.S			1416.19	3	4246.55	4246.55	0	0.2	158	Specific	550.92	392.56	392.56	6.44	3	>sp|P06748|NPM_HUMAN Nucleophosmin OS=Homo sapiens GN=NPM1 PE=1 SV=2	11500	YJC_160818_PC9mem_AALmnp_G_01.7950.7950.4	controllerType=0 controllerNumber=1 scan=7950	52.6294
09071:3	67	K.LAADEDDDDDDEEDDDEDDDDDDFDDEEAEEKAPVKK.S			1416.19	3	4246.55	4246.55	0	0.2	158	Specific	604.72	479.31	479.31	9.22	3	>sp|P06748|NPM_HUMAN Nucleophosmin OS=Homo sapiens GN=NPM1 PE=1 SV=2	11500	YJC_160818_PC9mem_AALmnp_G_01.7951.7951.4	controllerType=0 controllerNumber=1 scan=7951	52.6354
15273:4	67	K.LAADEDDDDDDEEDDDEDDDDDDFDDEEAEEKAPVKK.S			1062.39	4	4246.55	4246.55	0	-0.7	158	Specific	714.03	480.76	480.76	11.16	3	>sp|P06748|NPM_HUMAN Nucleophosmin OS=Homo sapiens GN=NPM1 PE=1 SV=2	11500	YJC_160818_PC9mem_AALmnp_G_01.13359.13359.2	controllerType=0 controllerNumber=1 scan=13359	85.1117
14676:4	67	K.LAADEDDDDDDEEDDDEDDDDDDFDDEEAEEKAPVKK.S			1062.15	4	4245.57	4246.55	-1	4.3	158	Specific	756.71	518.35	518.35	11.99	3	>sp|P06748|NPM_HUMAN Nucleophosmin OS=Homo sapiens GN=NPM1 PE=1 SV=2	11500	YJC_160818_PC9mem_AALmnp_G_01.12796.12796.2	controllerType=0 controllerNumber=1 scan=12796	81.6448
06418:3	67	K.LAADEDDDDDDEEDDDEDDDDDDFDDEEAEEKAPVKK.S			1416.19	3	4246.55	4246.55	0	-1.2	158	Specific	777.93	680.82	680.82	12.35	3	>sp|P06748|NPM_HUMAN Nucleophosmin OS=Homo sapiens GN=NPM1 PE=1 SV=2	11500	YJC_160818_PC9mem_AALmnp_G_01.5864.5864.3	controllerType=0 controllerNumber=1 scan=5864	40.272
12337:3	67	K.LAADEDDDDDDEEDDDEDDDDDDFDDEEAEEKAPVKK.S			1416.17	3	4246.51	4246.55	0	-9.8	158	Specific	778.27	584	584	11.37	3	>sp|P06748|NPM_HUMAN Nucleophosmin OS=Homo sapiens GN=NPM1 PE=1 SV=2	11500	YJC_160818_PC9mem_AALmnp_G_01.10662.10662.2	controllerType=0 controllerNumber=1 scan=10662	68.5139
07672:3	67	K.LAADEDDDDDDEEDDDEDDDDDDFDDEEAEEKAPVKK.S			1416.19	3	4246.56	4246.55	0	1.7	158	Specific	788.9	719.07	719.07	12.05	3	>sp|P06748|NPM_HUMAN Nucleophosmin OS=Homo sapiens GN=NPM1 PE=1 SV=2	11500	YJC_160818_PC9mem_AALmnp_G_01.6864.6864.3	controllerType=0 controllerNumber=1 scan=6864	46.3173
07058:3	67	K.LAADEDDDDDDEEDDDEDDDDDDFDDEEAEEKAPVKK.S			1416.19	3	4246.55	4246.55	0	-1	158	Specific	806.48	717.39	717.39	13.3	3	>sp|P06748|NPM_HUMAN Nucleophosmin OS=Homo sapiens GN=NPM1 PE=1 SV=2	11500	YJC_160818_PC9mem_AALmnp_G_01.6360.6360.3	controllerType=0 controllerNumber=1 scan=6360	43.3121
09199:4	67	K.LAADEDDDDDDEEDDDEDDDDDDFDDEEAEEKAPVKK.S			1062.39	4	4246.54	4246.55	0	-1.5	158	Specific	815.33	627.37	627.37	13.61	3	>sp|P06748|NPM_HUMAN Nucleophosmin OS=Homo sapiens GN=NPM1 PE=1 SV=2	11500	YJC_160818_PC9mem_AALmnp_G_01.8049.8049.4	controllerType=0 controllerNumber=1 scan=8049	53.1794
05417:4	67	K.LAADEDDDDDDEEDDDEDDDDDDFDDEEAEEKAPVKK.S			1062.39	4	4246.54	4246.55	0	-2.3	158	Specific	816.28	691.68	691.68	13.73	3	>sp|P06748|NPM_HUMAN Nucleophosmin OS=Homo sapiens GN=NPM1 PE=1 SV=2	11500	YJC_160818_PC9mem_AALmnp_G_01.5116.5116.4	controllerType=0 controllerNumber=1 scan=5116	35.6545
11949:4	67	K.LAADEDDDDDDEEDDDEDDDDDDFDDEEAEEKAPVKK.S			1062.39	4	4246.54	4246.55	0	-1.6	158	Specific	836.8	534.01	534.01	13.61	3	>sp|P06748|NPM_HUMAN Nucleophosmin OS=Homo sapiens GN=NPM1 PE=1 SV=2	11500	YJC_160818_PC9mem_AALmnp_G_01.10321.10321.4	controllerType=0 controllerNumber=1 scan=10321	66.4232
09690:3	67	K.LAADEDDDDDDEEDDDEDDDDDDFDDEEAEEKAPVKK.S			1416.19	3	4246.55	4246.55	0	0.6	158	Specific	837.26	751.9	751.9	13.22	3	>sp|P06748|NPM_HUMAN Nucleophosmin OS=Homo sapiens GN=NPM1 PE=1 SV=2	11500	YJC_160818_PC9mem_AALmnp_G_01.8440.8440.3	controllerType=0 controllerNumber=1 scan=8440	55.5126
13615:4	67	K.LAADEDDDDDDEEDDDEDDDDDDFDDEEAEEKAPVKK.S			1062.39	4	4246.54	4246.55	0	-3.1	158	Specific	854.03	597.82	597.82	14.73	3	>sp|P06748|NPM_HUMAN Nucleophosmin OS=Homo sapiens GN=NPM1 PE=1 SV=2	11500	YJC_160818_PC9mem_AALmnp_G_01.11785.11785.4	controllerType=0 controllerNumber=1 scan=11785	75.4737
12507:4	67	K.LAADEDDDDDDEEDDDEDDDDDDFDDEEAEEKAPVKK.S			1062.39	4	4246.55	4246.55	0	0.4	158	Specific	858.86	646.01	646.01	14.48	3	>sp|P06748|NPM_HUMAN Nucleophosmin OS=Homo sapiens GN=NPM1 PE=1 SV=2	11500	YJC_160818_PC9mem_AALmnp_G_01.10808.10808.4	controllerType=0 controllerNumber=1 scan=10808	69.4324
14187:4	67	K.LAADEDDDDDDEEDDDEDDDDDDFDDEEAEEKAPVKK.S			1062.4	4	4246.56	4246.55	0	2.9	158	Specific	862.29	610.88	610.88	14.4	3	>sp|P06748|NPM_HUMAN Nucleophosmin OS=Homo sapiens GN=NPM1 PE=1 SV=2	11500	YJC_160818_PC9mem_AALmnp_G_01.12290.12290.2	controllerType=0 controllerNumber=1 scan=12290	78.4984
09953:4	67	K.LAADEDDDDDDEEDDDEDDDDDDFDDEEAEEKAPVKK.S			1062.39	4	4246.55	4246.55	0	-1.2	158	Specific	866.18	667.58	667.58	14.61	3	>sp|P06748|NPM_HUMAN Nucleophosmin OS=Homo sapiens GN=NPM1 PE=1 SV=2	11500	YJC_160818_PC9mem_AALmnp_G_01.8659.8659.4	controllerType=0 controllerNumber=1 scan=8659	56.8516
08384:3	67	K.LAADEDDDDDDEEDDDEDDDDDDFDDEEAEEKAPVKK.S			1416.19	3	4246.55	4246.55	0	-0.5	158	Specific	867.14	785.52	785.52	14.3	3	>sp|P06748|NPM_HUMAN Nucleophosmin OS=Homo sapiens GN=NPM1 PE=1 SV=2	11500	YJC_160818_PC9mem_AALmnp_G_01.7409.7409.3	controllerType=0 controllerNumber=1 scan=7409	49.4287
07479:3	67	K.LAADEDDDDDDEEDDDEDDDDDDFDDEEAEEKAPVKK.S			1416.18	3	4246.54	4246.55	0	-2.5	158	Specific	873.58	737.19	737.19	14.47	3	>sp|P06748|NPM_HUMAN Nucleophosmin OS=Homo sapiens GN=NPM1 PE=1 SV=2	11500	YJC_160818_PC9mem_AALmnp_G_01.6695.6695.4	controllerType=0 controllerNumber=1 scan=6695	45.3013
10312:3	67	K.LAADEDDDDDDEEDDDEDDDDDDFDDEEAEEKAPVKK.S			1416.18	3	4246.54	4246.55	0	-3.2	158	Specific	879.63	788.16	788.16	14.38	3	>sp|P06748|NPM_HUMAN Nucleophosmin OS=Homo sapiens GN=NPM1 PE=1 SV=2	11500	YJC_160818_PC9mem_AALmnp_G_01.8955.8955.3	controllerType=0 controllerNumber=1 scan=8955	58.633
06081:4	67	K.LAADEDDDDDDEEDDDEDDDDDDFDDEEAEEKAPVKK.S			1062.39	4	4246.54	4246.55	0	-1.8	158	Specific	882.66	747.41	747.41	14.61	3	>sp|P06748|NPM_HUMAN Nucleophosmin OS=Homo sapiens GN=NPM1 PE=1 SV=2	11500	YJC_160818_PC9mem_AALmnp_G_01.5617.5617.4	controllerType=0 controllerNumber=1 scan=5617	38.8022
08391:4	67	K.LAADEDDDDDDEEDDDEDDDDDDFDDEEAEEKAPVKK.S			1062.39	4	4246.54	4246.55	0	-1.8	158	Specific	883.64	719.73	719.73	14.61	3	>sp|P06748|NPM_HUMAN Nucleophosmin OS=Homo sapiens GN=NPM1 PE=1 SV=2	11500	YJC_160818_PC9mem_AALmnp_G_01.7415.7415.4	controllerType=0 controllerNumber=1 scan=7415	49.4639
23125:4	67	K.LAADEDDDDDDEEDDDEDDDDDDFDDEEAEEKAPVKK.S			1062.14	4	4245.55	4246.55	-1	1.3	158	Specific	890.75	692.14	692.14	14.04	3	>sp|P06748|NPM_HUMAN Nucleophosmin OS=Homo sapiens GN=NPM1 PE=1 SV=2	11500	YJC_160818_PC9mem_AALmnp_G_01.21408.21408.4	controllerType=0 controllerNumber=1 scan=21408	145.66
13067:4	67	K.LAADEDDDDDDEEDDDEDDDDDDFDDEEAEEKAPVKK.S			1062.39	4	4246.55	4246.55	0	-1.1	158	Specific	894.03	685.88	685.88	14.61	3	>sp|P06748|NPM_HUMAN Nucleophosmin OS=Homo sapiens GN=NPM1 PE=1 SV=2	11500	YJC_160818_PC9mem_AALmnp_G_01.11298.11298.4	controllerType=0 controllerNumber=1 scan=11298	72.4651
06909:4	67	K.LAADEDDDDDDEEDDDEDDDDDDFDDEEAEEKAPVKK.S			1062.39	4	4246.54	4246.55	0	-1.8	158	Specific	919.68	781.38	781.38	15.61	3	>sp|P06748|NPM_HUMAN Nucleophosmin OS=Homo sapiens GN=NPM1 PE=1 SV=2	11500	YJC_160818_PC9mem_AALmnp_G_01.6239.6239.4	controllerType=0 controllerNumber=1 scan=6239	42.568
22889:4	67	K.LAADEDDDDDDEEDDDEDDDDDDFDDEEAEEKAPVKK.S			1062.4	4	4246.56	4246.55	0	3.3	158	Specific	921.5	619.74	619.74	15.33	3	>sp|P06748|NPM_HUMAN Nucleophosmin OS=Homo sapiens GN=NPM1 PE=1 SV=2	11500	YJC_160818_PC9mem_AALmnp_G_01.21004.21004.4	controllerType=0 controllerNumber=1 scan=21004	141.974
09022:3	67	K.LAADEDDDDDDEEDDDEDDDDDDFDDEEAEEKAPVKK.S			1416.19	3	4246.55	4246.55	0	-1.1	158	Specific	926.07	876.6	876.6	15.35	3	>sp|P06748|NPM_HUMAN Nucleophosmin OS=Homo sapiens GN=NPM1 PE=1 SV=2	11500	YJC_160818_PC9mem_AALmnp_G_01.7915.7915.3	controllerType=0 controllerNumber=1 scan=7915	52.4241
07541:4	67	K.LAADEDDDDDDEEDDDEDDDDDDFDDEEAEEKAPVKK.S			1062.39	4	4246.54	4246.55	0	-1.7	158	Specific	939.79	733.82	733.82	15.61	3	>sp|P06748|NPM_HUMAN Nucleophosmin OS=Homo sapiens GN=NPM1 PE=1 SV=2	11500	YJC_160818_PC9mem_AALmnp_G_01.6745.6745.4	controllerType=0 controllerNumber=1 scan=6745	45.5884
09201:4	67	K.LAADEDDDDDDEEDDDEDDDDDDFDDEEAEEKAPVKK.S			1062.39	4	4246.54	4246.55	0	-1.5	158	Specific	940.25	931.12	931.12	15.61	3	>sp|P06748|NPM_HUMAN Nucleophosmin OS=Homo sapiens GN=NPM1 PE=1 SV=2	11500	YJC_160818_PC9mem_AALmnp_G_01.8050.8050.4	controllerType=0 controllerNumber=1 scan=8050	53.1851
07542:4	67	K.LAADEDDDDDDEEDDDEDDDDDDFDDEEAEEKAPVKK.S			1062.39	4	4246.54	4246.55	0	-1.7	158	Specific	940.52	906.4	906.4	15.61	3	>sp|P06748|NPM_HUMAN Nucleophosmin OS=Homo sapiens GN=NPM1 PE=1 SV=2	11500	YJC_160818_PC9mem_AALmnp_G_01.6746.6746.4	controllerType=0 controllerNumber=1 scan=6746	45.5941
10553:4	67	K.LAADEDDDDDDEEDDDEDDDDDDFDDEEAEEKAPVKK.S			1062.39	4	4246.54	4246.55	0	-1.9	158	Specific	942.25	789.06	789.06	15.61	3	>sp|P06748|NPM_HUMAN Nucleophosmin OS=Homo sapiens GN=NPM1 PE=1 SV=2	11500	YJC_160818_PC9mem_AALmnp_G_01.9163.9163.4	controllerType=0 controllerNumber=1 scan=9163	59.9004
11950:4	67	K.LAADEDDDDDDEEDDDEDDDDDDFDDEEAEEKAPVKK.S			1062.39	4	4246.54	4246.55	0	-1.6	158	Specific	958.48	899.84	899.84	16.61	3	>sp|P06748|NPM_HUMAN Nucleophosmin OS=Homo sapiens GN=NPM1 PE=1 SV=2	11500	YJC_160818_PC9mem_AALmnp_G_01.10322.10322.4	controllerType=0 controllerNumber=1 scan=10322	66.4291
09954:4	67	K.LAADEDDDDDDEEDDDEDDDDDDFDDEEAEEKAPVKK.S			1062.39	4	4246.55	4246.55	0	-1.2	158	Specific	959.86	921.84	921.84	16.61	3	>sp|P06748|NPM_HUMAN Nucleophosmin OS=Homo sapiens GN=NPM1 PE=1 SV=2	11500	YJC_160818_PC9mem_AALmnp_G_01.8660.8660.4	controllerType=0 controllerNumber=1 scan=8660	56.8573
22891:4	67	K.LAADEDDDDDDEEDDDEDDDDDDFDDEEAEEKAPVKK.S			1062.4	4	4246.56	4246.55	0	3.3	158	Specific	971.8	971.8	971.8	16.33	3	>sp|P06748|NPM_HUMAN Nucleophosmin OS=Homo sapiens GN=NPM1 PE=1 SV=2	11500	YJC_160818_PC9mem_AALmnp_G_01.21005.21005.4	controllerType=0 controllerNumber=1 scan=21005	141.981
07851:3	67	K.LAADEDDDDDDEEDDDEDDDDDDFDDEEAEEKAPVKK.S			1416.19	3	4246.54	4246.55	0	-2.2	158	Specific	972.65	766.76	766.76	16.47	3	>sp|P06748|NPM_HUMAN Nucleophosmin OS=Homo sapiens GN=NPM1 PE=1 SV=2	11500	YJC_160818_PC9mem_AALmnp_G_01.7008.7008.3	controllerType=0 controllerNumber=1 scan=7008	47.0999
13617:4	67	K.LAADEDDDDDDEEDDDEDDDDDDFDDEEAEEKAPVKK.S			1062.39	4	4246.54	4246.55	0	-3.1	158	Specific	992.83	936.41	936.41	16.73	3	>sp|P06748|NPM_HUMAN Nucleophosmin OS=Homo sapiens GN=NPM1 PE=1 SV=2	11500	YJC_160818_PC9mem_AALmnp_G_01.11786.11786.4	controllerType=0 controllerNumber=1 scan=11786	75.4797
07481:3	67	K.LAADEDDDDDDEEDDDEDDDDDDFDDEEAEEKAPVKK.S			1416.18	3	4246.54	4246.55	0	-2.5	158	Specific	1011.07	878.05	878.05	17.47	3	>sp|P06748|NPM_HUMAN Nucleophosmin OS=Homo sapiens GN=NPM1 PE=1 SV=2	11500	YJC_160818_PC9mem_AALmnp_G_01.6696.6696.4	controllerType=0 controllerNumber=1 scan=6696	45.3083
08393:4	67	K.LAADEDDDDDDEEDDDEDDDDDDFDDEEAEEKAPVKK.S			1062.39	4	4246.54	4246.55	0	-1.8	158	Specific	1016.85	996.91	996.91	17.61	3	>sp|P06748|NPM_HUMAN Nucleophosmin OS=Homo sapiens GN=NPM1 PE=1 SV=2	11500	YJC_160818_PC9mem_AALmnp_G_01.7416.7416.4	controllerType=0 controllerNumber=1 scan=7416	49.4696
06910:4	67	K.LAADEDDDDDDEEDDDEDDDDDDFDDEEAEEKAPVKK.S			1062.39	4	4246.54	4246.55	0	-1.8	158	Specific	1036.48	1003.5	1003.5	17.61	3	>sp|P06748|NPM_HUMAN Nucleophosmin OS=Homo sapiens GN=NPM1 PE=1 SV=2	11500	YJC_160818_PC9mem_AALmnp_G_01.6240.6240.4	controllerType=0 controllerNumber=1 scan=6240	42.5738
12508:4	67	K.LAADEDDDDDDEEDDDEDDDDDDFDDEEAEEKAPVKK.S			1062.39	4	4246.55	4246.55	0	0.4	158	Specific	1064.25	1003.68	1003.68	18.48	3	>sp|P06748|NPM_HUMAN Nucleophosmin OS=Homo sapiens GN=NPM1 PE=1 SV=2	11500	YJC_160818_PC9mem_AALmnp_G_01.10809.10809.4	controllerType=0 controllerNumber=1 scan=10809	69.4383
13069:4	67	K.LAADEDDDDDDEEDDDEDDDDDDFDDEEAEEKAPVKK.S			1062.39	4	4246.55	4246.55	0	-1.1	158	Specific	1091.47	1033.57	1033.57	18.61	3	>sp|P06748|NPM_HUMAN Nucleophosmin OS=Homo sapiens GN=NPM1 PE=1 SV=2	11500	YJC_160818_PC9mem_AALmnp_G_01.11299.11299.4	controllerType=0 controllerNumber=1 scan=11299	72.4675
05750:3	67	K.LAADEDDDDDDEEDDDEDDDDDDFDDEEAEEKAPVKK.S			1415.85	3	4245.53	4246.55	-1	-5.1	158	Specific	1096.02	917.16	917.16	17.94	3	>sp|P06748|NPM_HUMAN Nucleophosmin OS=Homo sapiens GN=NPM1 PE=1 SV=2	11500	YJC_160818_PC9mem_AALmnp_G_01.5364.5364.3	controllerType=0 controllerNumber=1 scan=5364	37.207
10310:3	67	K.LAADEDDDDDDEEDDDEDDDDDDFDDEEAEEKAPVKK.S			1416.18	3	4246.54	4246.55	0	-3.2	158	Specific	1110.95	824.49	824.49	19.38	3	>sp|P06748|NPM_HUMAN Nucleophosmin OS=Homo sapiens GN=NPM1 PE=1 SV=2	11500	YJC_160818_PC9mem_AALmnp_G_01.8954.8954.3	controllerType=0 controllerNumber=1 scan=8954	58.629
08383:3	67	K.LAADEDDDDDDEEDDDEDDDDDDFDDEEAEEKAPVKK.S			1416.19	3	4246.55	4246.55	0	-0.5	158	Specific	1136.94	857.19	857.19	19.3	3	>sp|P06748|NPM_HUMAN Nucleophosmin OS=Homo sapiens GN=NPM1 PE=1 SV=2	11500	YJC_160818_PC9mem_AALmnp_G_01.7408.7408.3	controllerType=0 controllerNumber=1 scan=7408	49.426
10554:4	67	K.LAADEDDDDDDEEDDDEDDDDDDFDDEEAEEKAPVKK.S			1062.39	4	4246.54	4246.55	0	-1.9	158	Specific	1156.75	1099.19	1099.19	20.61	3	>sp|P06748|NPM_HUMAN Nucleophosmin OS=Homo sapiens GN=NPM1 PE=1 SV=2	11500	YJC_160818_PC9mem_AALmnp_G_01.9164.9164.4	controllerType=0 controllerNumber=1 scan=9164	59.9061
05418:4	67	K.LAADEDDDDDDEEDDDEDDDDDDFDDEEAEEKAPVKK.S			1062.39	4	4246.54	4246.55	0	-2.3	158	Specific	1168.45	1115.97	1115.97	20.73	3	>sp|P06748|NPM_HUMAN Nucleophosmin OS=Homo sapiens GN=NPM1 PE=1 SV=2	11500	YJC_160818_PC9mem_AALmnp_G_01.5117.5117.4	controllerType=0 controllerNumber=1 scan=5117	35.6602
06082:4	67	K.LAADEDDDDDDEEDDDEDDDDDDFDDEEAEEKAPVKK.S			1062.39	4	4246.54	4246.55	0	-1.8	158	Specific	1169.01	1119.32	1119.32	20.61	3	>sp|P06748|NPM_HUMAN Nucleophosmin OS=Homo sapiens GN=NPM1 PE=1 SV=2	11500	YJC_160818_PC9mem_AALmnp_G_01.5618.5618.4	controllerType=0 controllerNumber=1 scan=5618	38.8079
09688:3	67	K.LAADEDDDDDDEEDDDEDDDDDDFDDEEAEEKAPVKK.S			1416.19	3	4246.55	4246.55	0	0.6	158	Specific	1172.9	990.33	990.33	20.22	3	>sp|P06748|NPM_HUMAN Nucleophosmin OS=Homo sapiens GN=NPM1 PE=1 SV=2	11500	YJC_160818_PC9mem_AALmnp_G_01.8439.8439.3	controllerType=0 controllerNumber=1 scan=8439	55.5057
07671:3	67	K.LAADEDDDDDDEEDDDEDDDDDDFDDEEAEEKAPVKK.S			1416.19	3	4246.56	4246.55	0	1.7	158	Specific	1185.18	971.19	971.19	20.05	3	>sp|P06748|NPM_HUMAN Nucleophosmin OS=Homo sapiens GN=NPM1 PE=1 SV=2	11500	YJC_160818_PC9mem_AALmnp_G_01.6863.6863.3	controllerType=0 controllerNumber=1 scan=6863	46.3111
06417:3	67	K.LAADEDDDDDDEEDDDEDDDDDDFDDEEAEEKAPVKK.S			1416.19	3	4246.55	4246.55	0	-1.2	158	Specific	1224.88	978.26	978.26	21.35	3	>sp|P06748|NPM_HUMAN Nucleophosmin OS=Homo sapiens GN=NPM1 PE=1 SV=2	11500	YJC_160818_PC9mem_AALmnp_G_01.5863.5863.3	controllerType=0 controllerNumber=1 scan=5863	40.2691
07057:3	67	K.LAADEDDDDDDEEDDDEDDDDDDFDDEEAEEKAPVKK.S			1416.19	3	4246.55	4246.55	0	-1	158	Specific	1226.8	1064.57	1064.57	21.3	3	>sp|P06748|NPM_HUMAN Nucleophosmin OS=Homo sapiens GN=NPM1 PE=1 SV=2	11500	YJC_160818_PC9mem_AALmnp_G_01.6359.6359.3	controllerType=0 controllerNumber=1 scan=6359	43.3094
09021:3	67	K.LAADEDDDDDDEEDDDEDDDDDDFDDEEAEEKAPVKK.S			1416.19	3	4246.55	4246.55	0	-1.1	158	Specific	1232.84	1036.49	1036.49	21.35	3	>sp|P06748|NPM_HUMAN Nucleophosmin OS=Homo sapiens GN=NPM1 PE=1 SV=2	11500	YJC_160818_PC9mem_AALmnp_G_01.7914.7914.3	controllerType=0 controllerNumber=1 scan=7914	52.418
22290:5	68	R.LC[+57.021]DKAEAWGIVLETVATAGVVTSVAFMLTLPILVC[+57.021]K.V		C[+57]*2	776.017	5	3876.06	3876.07	0	-4.1	20	Specific	479.47	479.47	479.47	5.91	4	>sp|Q8NFJ5|RAI3_HUMAN Retinoic acid-induced protein 3 OS=Homo sapiens GN=GPRC5A PE=1 SV=2	14089	YJC_160818_PC9mem_AALmnp_G_01.19624.19624.5	controllerType=0 controllerNumber=1 scan=19624	126.554
22279:4	68	R.LC[+57.021]DKAEAWGIVLETVATAGVVTSVAFMLTLPILVC[+57.021]K.V		C[+57]*2	969.772	4	3876.07	3876.07	0	-1.9	20	Specific	608.62	343.12	343.12	7.76	4	>sp|Q8NFJ5|RAI3_HUMAN Retinoic acid-induced protein 3 OS=Homo sapiens GN=GPRC5A PE=1 SV=2	14089	YJC_160818_PC9mem_AALmnp_G_01.19616.19616.4	controllerType=0 controllerNumber=1 scan=19616	126.507
22289:5	68	R.LC[+57.021]DKAEAWGIVLETVATAGVVTSVAFMLTLPILVC[+57.021]K.V		C[+57]*2	776.017	5	3876.06	3876.07	0	-4.1	20	Specific	619.12	335.08	335.08	7.18	4	>sp|Q8NFJ5|RAI3_HUMAN Retinoic acid-induced protein 3 OS=Homo sapiens GN=GPRC5A PE=1 SV=2	14089	YJC_160818_PC9mem_AALmnp_G_01.19623.19623.5	controllerType=0 controllerNumber=1 scan=19623	126.549
22281:4	68	R.LC[+57.021]DKAEAWGIVLETVATAGVVTSVAFMLTLPILVC[+57.021]K.V		C[+57]*2	969.772	4	3876.07	3876.07	0	-1.9	20	Specific	700.25	700.25	700.25	11.14	4	>sp|Q8NFJ5|RAI3_HUMAN Retinoic acid-induced protein 3 OS=Homo sapiens GN=GPRC5A PE=1 SV=2	14089	YJC_160818_PC9mem_AALmnp_G_01.19617.19617.4	controllerType=0 controllerNumber=1 scan=19617	126.513
22175:4	68	R.LC[+57.021]DKAEAWGIVLETVATAGVVTSVAFMLTLPILVC[+57.021]KVQDSNR.R		C[+57]*2	1144.6	4	4575.39	4575.4	0	-3.5	20	Specific	954.22	649.04	456.29	16.52	4	>sp|Q8NFJ5|RAI3_HUMAN Retinoic acid-induced protein 3 OS=Homo sapiens GN=GPRC5A PE=1 SV=2	14089	YJC_160818_PC9mem_AALmnp_G_01.19532.19532.4	controllerType=0 controllerNumber=1 scan=19532	125.957
22176:4	68	R.LC[+57.021]DKAEAWGIVLETVATAGVVTSVAFMLTLPILVC[+57.021]KVQDSNR.R		C[+57]*2	1144.6	4	4575.39	4575.4	0	-3.5	20	Specific	959.62	959.62	509.58	16.52	4	>sp|Q8NFJ5|RAI3_HUMAN Retinoic acid-induced protein 3 OS=Homo sapiens GN=GPRC5A PE=1 SV=2	14089	YJC_160818_PC9mem_AALmnp_G_01.19533.19533.4	controllerType=0 controllerNumber=1 scan=19533	125.963
15609:4	68	R.GRKPLSLLVILGLAVGFSLVQDVIAIEYIVLTMN[+349.137]R.T	HexNAc(1)Fuc(1)	N[+349]	1041.09	4	4161.35	4160.37	1	-3.5	125	Specific	188.86	1.09	1.09	0.03	4	>sp|Q8NFJ5|RAI3_HUMAN Retinoic acid-induced protein 3 OS=Homo sapiens GN=GPRC5A PE=1 SV=2	14089	YJC_160818_PC9mem_AALmnp_G_01.13685.13685.7	controllerType=0 controllerNumber=1 scan=13685	87.1591
10935:3	68	R.AYSQEEITQGFEETGDTLYAPYSTHFQLQNQPPQK.E			1349.29	3	4045.87	4045.87	0	-1.8	299	Specific	339.18	288.25	31	4.99	4	>sp|Q8NFJ5|RAI3_HUMAN Retinoic acid-induced protein 3 OS=Homo sapiens GN=GPRC5A PE=1 SV=2	14089	YJC_160818_PC9mem_AALmnp_G_01.9472.9472.3	controllerType=0 controllerNumber=1 scan=9472	61.6572
10933:3	68	R.AYSQEEITQGFEETGDTLYAPYSTHFQLQNQPPQK.E			1349.29	3	4045.87	4045.87	0	-1.8	299	Specific	930.49	583.84	142.66	15.64	4	>sp|Q8NFJ5|RAI3_HUMAN Retinoic acid-induced protein 3 OS=Homo sapiens GN=GPRC5A PE=1 SV=2	14089	YJC_160818_PC9mem_AALmnp_G_01.9471.9471.3	controllerType=0 controllerNumber=1 scan=9471	61.6516
09853:2	69	R.TFVSGAC[+57.021]DASIKLWDVR.D		C[+57]	962.991	2	1924.97	1924.96	0	8	198	Specific	379	283.87	283.87	4.75	4	>sp|P62879|GBB2_HUMAN Guanine nucleotide-binding protein G(I)/G(S)/G(T) subunit beta-2 OS=Homo sapiens GN=GNB2 PE=1 SV=3	6553	YJC_160818_PC9mem_AALmnp_G_01.8578.8578.2	controllerType=0 controllerNumber=1 scan=8578	56.3344
09855:2	69	R.TFVSGAC[+57.021]DASIKLWDVR.D		C[+57]	962.991	2	1924.97	1924.96	0	8	198	Specific	391.78	301.77	301.77	4.28	4	>sp|P62879|GBB2_HUMAN Guanine nucleotide-binding protein G(I)/G(S)/G(T) subunit beta-2 OS=Homo sapiens GN=GNB2 PE=1 SV=3	6553	YJC_160818_PC9mem_AALmnp_G_01.8579.8579.2	controllerType=0 controllerNumber=1 scan=8579	56.3399
14895:4	69	R.LFDLRADQELLMYSHDNIIC[+57.021]GITSVAFSR.S		C[+57]	846.921	4	3384.66	3384.67	0	-3	252	Specific	293.22	158.18	158.18	3.61	4	>sp|P62879|GBB2_HUMAN Guanine nucleotide-binding protein G(I)/G(S)/G(T) subunit beta-2 OS=Homo sapiens GN=GNB2 PE=1 SV=3	6553	YJC_160818_PC9mem_AALmnp_G_01.13016.13016.4	controllerType=0 controllerNumber=1 scan=13016	83.035
14911:3	69	R.LFDLRADQELLMYSHDNIIC[+57.021]GITSVAFSR.S		C[+57]	1128.89	3	3384.65	3384.67	0	-6	252	Specific	643.82	413.44	413.44	8.46	4	>sp|P62879|GBB2_HUMAN Guanine nucleotide-binding protein G(I)/G(S)/G(T) subunit beta-2 OS=Homo sapiens GN=GNB2 PE=1 SV=3	6553	YJC_160818_PC9mem_AALmnp_G_01.13031.13031.3	controllerType=0 controllerNumber=1 scan=13031	83.1301
14897:4	69	R.LFDLRADQELLMYSHDNIIC[+57.021]GITSVAFSR.S		C[+57]	846.921	4	3384.66	3384.67	0	-3	252	Specific	803.28	615.67	615.67	13.9	4	>sp|P62879|GBB2_HUMAN Guanine nucleotide-binding protein G(I)/G(S)/G(T) subunit beta-2 OS=Homo sapiens GN=GNB2 PE=1 SV=3	6553	YJC_160818_PC9mem_AALmnp_G_01.13017.13017.4	controllerType=0 controllerNumber=1 scan=13017	83.0413
14913:3	69	R.LFDLRADQELLMYSHDNIIC[+57.021]GITSVAFSR.S		C[+57]	1128.89	3	3384.65	3384.67	0	-6	252	Specific	927.88	793.29	793.29	15.12	4	>sp|P62879|GBB2_HUMAN Guanine nucleotide-binding protein G(I)/G(S)/G(T) subunit beta-2 OS=Homo sapiens GN=GNB2 PE=1 SV=3	6553	YJC_160818_PC9mem_AALmnp_G_01.13032.13032.3	controllerType=0 controllerNumber=1 scan=13032	83.1364
12881:3	69	R.LLLAGYDDFNC[+57.021]NIWDAMKGDR.A		C[+57]	829.718	3	2487.14	2487.14	0	-1.3	284	Specific	245.57	245.57	245.57	3.64	4	>sp|P62879|GBB2_HUMAN Guanine nucleotide-binding protein G(I)/G(S)/G(T) subunit beta-2 OS=Homo sapiens GN=GNB2 PE=1 SV=3	6553	YJC_160818_PC9mem_AALmnp_G_01.11124.11124.3	controllerType=0 controllerNumber=1 scan=11124	71.3594
12831:3	69	R.LLLAGYDDFNC[+57.021]NIWDAMKGDR.A		C[+57]	829.716	3	2487.13	2487.14	0	-4	284	Specific	591.68	461.33	461.33	8.5	4	>sp|P62879|GBB2_HUMAN Guanine nucleotide-binding protein G(I)/G(S)/G(T) subunit beta-2 OS=Homo sapiens GN=GNB2 PE=1 SV=3	6553	YJC_160818_PC9mem_AALmnp_G_01.11089.11089.3	controllerType=0 controllerNumber=1 scan=11089	71.1467
12833:3	69	R.LLLAGYDDFNC[+57.021]NIWDAMKGDR.A		C[+57]	829.716	3	2487.13	2487.14	0	-4	284	Specific	824.15	807.31	807.31	13.9	4	>sp|P62879|GBB2_HUMAN Guanine nucleotide-binding protein G(I)/G(S)/G(T) subunit beta-2 OS=Homo sapiens GN=GNB2 PE=1 SV=3	6553	YJC_160818_PC9mem_AALmnp_G_01.11090.11090.3	controllerType=0 controllerNumber=1 scan=11090	71.1526
12990:2	69	R.VSC[+57.021]LGVTDDGMAVATGSWDSFLK.I		C[+57]	1208.56	2	2416.11	2416.12	0	-1.1	315	Specific	397.39	307.14	307.14	4.87	4	>sp|P62879|GBB2_HUMAN Guanine nucleotide-binding protein G(I)/G(S)/G(T) subunit beta-2 OS=Homo sapiens GN=GNB2 PE=1 SV=3	6553	YJC_160818_PC9mem_AALmnp_G_01.11215.11215.2	controllerType=0 controllerNumber=1 scan=11215	71.9233
12992:3	69	R.VSC[+57.021]LGVTDDGMAVATGSWDSFLK.I		C[+57]	806.038	3	2416.1	2416.12	0	-6.3	315	Specific	570.02	306.69	306.69	5.12	4	>sp|P62879|GBB2_HUMAN Guanine nucleotide-binding protein G(I)/G(S)/G(T) subunit beta-2 OS=Homo sapiens GN=GNB2 PE=1 SV=3	6553	YJC_160818_PC9mem_AALmnp_G_01.11216.11216.3	controllerType=0 controllerNumber=1 scan=11216	71.9287
12994:3	69	R.VSC[+57.021]LGVTDDGMAVATGSWDSFLK.I		C[+57]	806.038	3	2416.1	2416.12	0	-6.3	315	Specific	605.38	569.61	569.61	8.82	4	>sp|P62879|GBB2_HUMAN Guanine nucleotide-binding protein G(I)/G(S)/G(T) subunit beta-2 OS=Homo sapiens GN=GNB2 PE=1 SV=3	6553	YJC_160818_PC9mem_AALmnp_G_01.11217.11217.3	controllerType=0 controllerNumber=1 scan=11217	71.9314
12989:2	69	R.VSC[+57.021]LGVTDDGMAVATGSWDSFLK.I		C[+57]	1208.56	2	2416.11	2416.12	0	-1.1	315	Specific	674.03	493.51	493.51	10.84	4	>sp|P62879|GBB2_HUMAN Guanine nucleotide-binding protein G(I)/G(S)/G(T) subunit beta-2 OS=Homo sapiens GN=GNB2 PE=1 SV=3	6553	YJC_160818_PC9mem_AALmnp_G_01.11214.11214.2	controllerType=0 controllerNumber=1 scan=11214	71.9162
09103:3	70	K.SKC[+57.021]FYTTDTEC[+57.021]DLTDEIVKDVK.Q		C[+57]*2	889.741	3	2667.21	2667.22	0	-3	79	Specific	717.9	539.93	539.93	11.65	9	>sp|P13726|TF_HUMAN Tissue factor OS=Homo sapiens GN=F3 PE=1 SV=1	17370	YJC_160818_PC9mem_AALmnp_G_01.7972.7972.3	controllerType=0 controllerNumber=1 scan=7972	52.7414
09104:3	70	K.SKC[+57.021]FYTTDTEC[+57.021]DLTDEIVKDVK.Q		C[+57]*2	889.741	3	2667.21	2667.22	0	-3	79	Specific	735.96	716.64	716.64	11.65	9	>sp|P13726|TF_HUMAN Tissue factor OS=Homo sapiens GN=F3 PE=1 SV=1	17370	YJC_160818_PC9mem_AALmnp_G_01.7973.7973.3	controllerType=0 controllerNumber=1 scan=7973	52.7473
10183:3	70	K.C[+57.021]FYTTDTEC[+57.021]DLTDEIVKDVK.Q		C[+57]*2	818.036	3	2452.09	2452.09	0	1.1	81	Specific	549.5	364.58	364.58	6.18	9	>sp|P13726|TF_HUMAN Tissue factor OS=Homo sapiens GN=F3 PE=1 SV=1	17370	YJC_160818_PC9mem_AALmnp_G_01.8850.8850.3	controllerType=0 controllerNumber=1 scan=8850	57.9771
10185:3	70	K.C[+57.021]FYTTDTEC[+57.021]DLTDEIVKDVK.Q		C[+57]*2	818.036	3	2452.09	2452.09	0	1.1	81	Specific	648.67	590.2	590.2	9.57	9	>sp|P13726|TF_HUMAN Tissue factor OS=Homo sapiens GN=F3 PE=1 SV=1	17370	YJC_160818_PC9mem_AALmnp_G_01.8851.8851.3	controllerType=0 controllerNumber=1 scan=8851	57.9831
05427:3	70	R.RN[+2205.793]NTFLSLR.D	HexNAc(4)Hex(5)Fuc(2)NeuAc(1)	N[+2206]	1109.47	3	3326.4	3326.41	0	-4	168	Specific	158.13	27.06	27.06	0.95	9	>sp|P13726|TF_HUMAN Tissue factor OS=Homo sapiens GN=F3 PE=1 SV=1	17370	YJC_160818_PC9mem_AALmnp_G_01.5126.5126.3	controllerType=0 controllerNumber=1 scan=5126	35.7172
06370:2	70	R.N[+2205.793]NTFLSLR.D	HexNAc(4)Hex(5)Fuc(2)NeuAc(1)	N[+2206]	1585.65	2	3170.29	3170.31	0	-6.3	169	Specific	203.84	29.17	29.17	0.98	9	>sp|P13726|TF_HUMAN Tissue factor OS=Homo sapiens GN=F3 PE=1 SV=1	17370	YJC_160818_PC9mem_AALmnp_G_01.5829.5829.2	controllerType=0 controllerNumber=1 scan=5829	40.0731
05669:2	70	R.N[+1914.697]NTFLSLR.D	HexNAc(4)Hex(5)Fuc(2)	N[+1915]	1440.11	2	2879.22	2879.22	0	-0.9	169	Specific	251.43	41.26	41.26	3.25	9	>sp|P13726|TF_HUMAN Tissue factor OS=Homo sapiens GN=F3 PE=1 SV=1	17370	YJC_160818_PC9mem_AALmnp_G_01.5308.5308.2	controllerType=0 controllerNumber=1 scan=5308	36.8775
14361:2	70	R.DVFGKDLIYTLYYWK.S			962.499	2	1923.99	1923.99	0	1	177	Specific	413.4	284.39	284.39	4.79	9	>sp|P13726|TF_HUMAN Tissue factor OS=Homo sapiens GN=F3 PE=1 SV=1	17370	YJC_160818_PC9mem_AALmnp_G_01.12472.12472.2	controllerType=0 controllerNumber=1 scan=12472	79.6269
14359:2	70	R.DVFGKDLIYTLYYWK.S			962.499	2	1923.99	1923.99	0	1	177	Specific	437.28	303.49	303.49	5.25	9	>sp|P13726|TF_HUMAN Tissue factor OS=Homo sapiens GN=F3 PE=1 SV=1	17370	YJC_160818_PC9mem_AALmnp_G_01.12471.12471.2	controllerType=0 controllerNumber=1 scan=12471	79.6209
11807:4	70	K.TNTNEFLIDVDKGENYC[+57.021]FSVQAVIPSR.T		C[+57]	779.879	4	3116.49	3116.5	0	-2.2	202	Specific	162.95	36.53	36.53	0.04	9	>sp|P13726|TF_HUMAN Tissue factor OS=Homo sapiens GN=F3 PE=1 SV=1	17370	YJC_160818_PC9mem_AALmnp_G_01.10208.10208.4	controllerType=0 controllerNumber=1 scan=10208	65.7342
11776:3	70	K.TNTNEFLIDVDKGENYC[+57.021]FSVQAVIPSR.T		C[+57]	1039.5	3	3116.48	3116.5	0	-6.2	202	Specific	676.71	451.19	451.19	9.64	9	>sp|P13726|TF_HUMAN Tissue factor OS=Homo sapiens GN=F3 PE=1 SV=1	17370	YJC_160818_PC9mem_AALmnp_G_01.10185.10185.3	controllerType=0 controllerNumber=1 scan=10185	65.6182
11808:4	70	K.TNTNEFLIDVDKGENYC[+57.021]FSVQAVIPSR.T		C[+57]	779.879	4	3116.49	3116.5	0	-2.2	202	Specific	679.11	641.34	641.34	10.36	9	>sp|P13726|TF_HUMAN Tissue factor OS=Homo sapiens GN=F3 PE=1 SV=1	17370	YJC_160818_PC9mem_AALmnp_G_01.10209.10209.4	controllerType=0 controllerNumber=1 scan=10209	65.7404
11778:3	70	K.TNTNEFLIDVDKGENYC[+57.021]FSVQAVIPSR.T		C[+57]	1039.5	3	3116.48	3116.5	0	-6.2	202	Specific	998.04	901.02	901.02	16.3	9	>sp|P13726|TF_HUMAN Tissue factor OS=Homo sapiens GN=F3 PE=1 SV=1	17370	YJC_160818_PC9mem_AALmnp_G_01.10186.10186.3	controllerType=0 controllerNumber=1 scan=10186	65.621
12351:3	70	K.TN[+0.984]TNEFLIDVDKGENYC[+57.021]FSVQAVIPSR.T		C[+57], N[+1]	1039.84	3	3117.49	3117.48	0	3.5	202	Specific	381.2	124.46	0	2.67	9	>sp|P13726|TF_HUMAN Tissue factor OS=Homo sapiens GN=F3 PE=1 SV=1	17370	YJC_160818_PC9mem_AALmnp_G_01.10678.10678.3	controllerType=0 controllerNumber=1 scan=10678	68.6264
12353:3	70	K.TNTN[+0.984]EFLIDVDKGENYC[+57.021]FSVQAVIPSR.T		C[+57], N[+1]	1039.84	3	3117.49	3117.48	0	3.5	202	Specific	703.07	660.91	72.56	11.5	9	>sp|P13726|TF_HUMAN Tissue factor OS=Homo sapiens GN=F3 PE=1 SV=1	17370	YJC_160818_PC9mem_AALmnp_G_01.10679.10679.3	controllerType=0 controllerNumber=1 scan=10679	68.6337
13685:4	71	R.EMQENDASMRDVVFNYLHATAFQ[+0.984]GTPLAQAVEGPSENVR.K		Q[+1]	1081.26	4	4322.02	4323.01	-1	2.6	171	Specific	368.6	42.41	7.03	0.49	6	>sp|P31930|QCR1_HUMAN Cytochrome b-c1 complex subunit 1, mitochondrial OS=Homo sapiens GN=UQCRC1 PE=1 SV=3	13955	YJC_160818_PC9mem_AALmnp_G_01.11847.11847.5	controllerType=0 controllerNumber=1 scan=11847	75.883
16688:7	71	R.HRDDALPFAHVAIAVEGPGWASPDNVALQVANAIIGHYDC[+57.021]TYGGGVHLSSPLASGAVANKLC[+57.021]QSFQTFSIC[+57.021]YAETGLLGAHFVC[+57.021]DR.M		C[+57]*4	1314.35	7	9194.4	9195.42	-1	-2.7	277	Specific	292.17	292.17	11.01	4.62	6	>sp|P31930|QCR1_HUMAN Cytochrome b-c1 complex subunit 1, mitochondrial OS=Homo sapiens GN=UQCRC1 PE=1 SV=3	13955	YJC_160818_PC9mem_AALmnp_G_01.14723.14723.2	controllerType=0 controllerNumber=1 scan=14723	93.7883
16686:8	71	R.HRDDALPFAHVAIAVEGPGWASPDNVALQVANAIIGHYDC[+57.021]TYGGGVHLSSPLASGAVANKLC[+57.021]QSFQTFSIC[+57.021]YAETGLLGAHFVC[+57.021]DR.M		C[+57]*4	1150.31	8	9195.44	9195.42	0	2	277	Specific	1273.4	1273.4	61.8	22.51	6	>sp|P31930|QCR1_HUMAN Cytochrome b-c1 complex subunit 1, mitochondrial OS=Homo sapiens GN=UQCRC1 PE=1 SV=3	13955	YJC_160818_PC9mem_AALmnp_G_01.14720.14720.4	controllerType=0 controllerNumber=1 scan=14720	93.7706
16685:8	71	R.HRDDALPFAHVAIAVEGPGWASPDNVALQVANAIIGHYDC[+57.021]TYGGGVHLSSPLASGAVANKLC[+57.021]QSFQ[+0.984]TFSIC[+57.021]YAETGLLGAHFVC[+57.021]DR.M		C[+57]*4, Q[+1]	1150.31	8	9195.44	9196.41	-1	4.1	277	Specific	514.79	94.26	11.41	3.03	6	>sp|P31930|QCR1_HUMAN Cytochrome b-c1 complex subunit 1, mitochondrial OS=Homo sapiens GN=UQCRC1 PE=1 SV=3	13955	YJC_160818_PC9mem_AALmnp_G_01.14719.14719.4	controllerType=0 controllerNumber=1 scan=14719	93.7649
16687:7	71	R.HRDDALPFAHVAIAVEGPGWASPDNVALQVANAIIGHYDC[+57.021]TYGGGVHLSSPLASGAVANKLC[+57.021]Q[+0.984]SFQTFSIC[+57.021]YAETGLLGAHFVC[+57.021]DR.M		C[+57]*4, Q[+1]	1314.35	7	9194.4	9196.41	-2	-0.6	277	Specific	670.38	180.1	9.94	7.32	6	>sp|P31930|QCR1_HUMAN Cytochrome b-c1 complex subunit 1, mitochondrial OS=Homo sapiens GN=UQCRC1 PE=1 SV=3	13955	YJC_160818_PC9mem_AALmnp_G_01.14722.14722.2	controllerType=0 controllerNumber=1 scan=14722	93.7823
13061:3	71	K.LC[+57.021]QSFQTFSIC[+57.021]YAETGLLGAHFVC[+57.021]DR.M		C[+57]*3	1027.47	3	3080.41	3080.41	0	0.7	337	Specific	396.77	201.55	201.55	3.61	6	>sp|P31930|QCR1_HUMAN Cytochrome b-c1 complex subunit 1, mitochondrial OS=Homo sapiens GN=UQCRC1 PE=1 SV=3	13955	YJC_160818_PC9mem_AALmnp_G_01.11293.11293.3	controllerType=0 controllerNumber=1 scan=11293	72.4345
13063:3	71	K.LC[+57.021]QSFQTFSIC[+57.021]YAETGLLGAHFVC[+57.021]DR.M		C[+57]*3	1027.47	3	3080.41	3080.41	0	0.7	337	Specific	961.58	884.3	884.3	16.71	6	>sp|P31930|QCR1_HUMAN Cytochrome b-c1 complex subunit 1, mitochondrial OS=Homo sapiens GN=UQCRC1 PE=1 SV=3	13955	YJC_160818_PC9mem_AALmnp_G_01.11294.11294.3	controllerType=0 controllerNumber=1 scan=11294	72.4423
03807:2	72	R.ALSN[+1914.697]ISLR.L	HexNAc(4)Hex(5)Fuc(2)	N[+1915]	1394.6	2	2788.2	2788.21	0	-4.1	124	Specific	289.39	124.56	124.56	3.9	17	>sp|O15031|PLXB2_HUMAN Plexin-B2 OS=Homo sapiens GN=PLXNB2 PE=1 SV=3	13257	YJC_160818_PC9mem_AALmnp_G_01.3840.3840.2	controllerType=0 controllerNumber=1 scan=3840	28.1646
06659:4	72	K.LSHDAN[+2060.755]ETLPLHLYVK.S	HexNAc(4)Hex(5)Fuc(3)	N[+2061]	978.437	4	3910.73	3910.74	0	-2.4	728	Specific	243.15	102.24	102.24	4.49	17	>sp|O15031|PLXB2_HUMAN Plexin-B2 OS=Homo sapiens GN=PLXNB2 PE=1 SV=3	13257	YJC_160818_PC9mem_AALmnp_G_01.6042.6042.4	controllerType=0 controllerNumber=1 scan=6042	41.3591
06687:4	72	K.LSHDAN[+1914.697]ETLPLHLYVK.S	HexNAc(4)Hex(5)Fuc(2)	N[+1915]	941.927	4	3764.69	3764.68	0	2.2	728	Specific	245.31	95.88	95.88	3.58	17	>sp|O15031|PLXB2_HUMAN Plexin-B2 OS=Homo sapiens GN=PLXNB2 PE=1 SV=3	13257	YJC_160818_PC9mem_AALmnp_G_01.6065.6065.4	controllerType=0 controllerNumber=1 scan=6065	41.4929
06676:3	72	K.LSHDAN[+2060.755]ETLPLHLYVK.S	HexNAc(4)Hex(5)Fuc(3)	N[+2061]	1304.26	3	3910.77	3910.74	0	8.6	728	Specific	330.1	191.13	191.13	4.18	17	>sp|O15031|PLXB2_HUMAN Plexin-B2 OS=Homo sapiens GN=PLXNB2 PE=1 SV=3	13257	YJC_160818_PC9mem_AALmnp_G_01.6054.6054.3	controllerType=0 controllerNumber=1 scan=6054	41.4291
07200:3	72	K.LSHDAN[+2205.793]ETLPLHLYVK.S	HexNAc(4)Hex(5)Fuc(2)NeuAc(1)	N[+2206]	1352.6	3	4055.78	4055.77	0	2.1	728	Specific	400.42	210.13	14.14	4.79	17	>sp|O15031|PLXB2_HUMAN Plexin-B2 OS=Homo sapiens GN=PLXNB2 PE=1 SV=3	13257	YJC_160818_PC9mem_AALmnp_G_01.6461.6461.3	controllerType=0 controllerNumber=1 scan=6461	43.8872
13266:4	72	R.FAMVVIAEPLQSWQPPREAESLQPMTVVGTDYVFHN[+2204.772]DTK.V	HexNAc(4)Hex(5)NeuAc(2)	N[+2205]	1660	4	6636.96	6635.95	1	1.1	1014	Specific	115.8	94.27	2.97	3.2	17	>sp|O15031|PLXB2_HUMAN Plexin-B2 OS=Homo sapiens GN=PLXNB2 PE=1 SV=3	13257	YJC_160818_PC9mem_AALmnp_G_01.11478.11478.4	controllerType=0 controllerNumber=1 scan=11478	73.6141
08240:3	72	R.EAESLQPMTVVGTDYVFHN[+2060.755]DTK.V	HexNAc(4)Hex(5)Fuc(3)	N[+2061]	1514.64	3	4541.91	4541.92	0	-0.6	1031	Specific	314.42	222.13	2.47	5.06	17	>sp|O15031|PLXB2_HUMAN Plexin-B2 OS=Homo sapiens GN=PLXNB2 PE=1 SV=3	13257	YJC_160818_PC9mem_AALmnp_G_01.7306.7306.3	controllerType=0 controllerNumber=1 scan=7306	48.8705
08756:3	72	R.EAESLQPMTVVGTDYVFHN[+2204.772]DTK.V	HexNAc(4)Hex(5)NeuAc(2)	N[+2205]	1562.99	3	4686.94	4685.93	1	1.2	1031	Specific	346.88	220.82	6.16	4.92	17	>sp|O15031|PLXB2_HUMAN Plexin-B2 OS=Homo sapiens GN=PLXNB2 PE=1 SV=3	13257	YJC_160818_PC9mem_AALmnp_G_01.7700.7700.3	controllerType=0 controllerNumber=1 scan=7700	51.1472
12774:4	72	K.VVFLSPAVPEEPEAYN[+1914.697]LTVLIEMDGHR.A	HexNAc(4)Hex(5)Fuc(2)	N[+1915]	1235.81	4	4940.22	4940.23	0	-1.7	1053	Specific	466.14	316.19	11.3	5.32	17	>sp|O15031|PLXB2_HUMAN Plexin-B2 OS=Homo sapiens GN=PLXNB2 PE=1 SV=3	13257	YJC_160818_PC9mem_AALmnp_G_01.11041.11041.4	controllerType=0 controllerNumber=1 scan=11041	70.8689
13178:4	72	K.VVFLSPAVPEEPEAYN[+2205.793]LTVLIEMDGHR.A	HexNAc(4)Hex(5)Fuc(2)NeuAc(1)	N[+2206]	1308.58	4	5231.31	5231.33	0	-2.5	1053	Specific	476.77	2.22	2.22	0.98	17	>sp|O15031|PLXB2_HUMAN Plexin-B2 OS=Homo sapiens GN=PLXNB2 PE=1 SV=3	13257	YJC_160818_PC9mem_AALmnp_G_01.11404.11404.4	controllerType=0 controllerNumber=1 scan=11404	73.1473
13180:4	72	K.VVFLSPAVPEEPEAYN[+2205.793]LTVLIEMDGHR.A	HexNAc(4)Hex(5)Fuc(2)NeuAc(1)	N[+2206]	1308.58	4	5231.31	5231.33	0	-2.5	1053	Specific	542.4	359.04	21.83	6.43	17	>sp|O15031|PLXB2_HUMAN Plexin-B2 OS=Homo sapiens GN=PLXNB2 PE=1 SV=3	13257	YJC_160818_PC9mem_AALmnp_G_01.11405.11405.4	controllerType=0 controllerNumber=1 scan=11405	73.1501
09869:4	72	R.ALLRTEAGAFEYVPDPTFEN[+1710.598]FTGGVKK.Q	HexNAc(3)Hex(5)NeuAc(1)	N[+1711]	1168.03	4	4669.11	4668.1	1	1.7	1080	Specific	127.58	43.3	43.3	1.49	17	>sp|O15031|PLXB2_HUMAN Plexin-B2 OS=Homo sapiens GN=PLXNB2 PE=1 SV=3	13257	YJC_160818_PC9mem_AALmnp_G_01.8589.8589.4	controllerType=0 controllerNumber=1 scan=8589	56.397
09794:4	72	R.ALLRTEAGAFEYVPDPTFEN[+2060.755]FTGGVKK.Q	HexNAc(4)Hex(5)Fuc(3)	N[+2061]	1255.32	4	5018.26	5018.26	0	-0.2	1080	Specific	275.52	71.01	6.32	3.85	17	>sp|O15031|PLXB2_HUMAN Plexin-B2 OS=Homo sapiens GN=PLXNB2 PE=1 SV=3	13257	YJC_160818_PC9mem_AALmnp_G_01.8528.8528.4	controllerType=0 controllerNumber=1 scan=8528	56.0141
09804:4	72	R.ALLRTEAGAFEYVPDPTFEN[+1914.697]FTGGVKK.Q	HexNAc(4)Hex(5)Fuc(2)	N[+1915]	1218.81	4	4872.21	4872.2	0	0.8	1080	Specific	417.46	133.68	47.59	4.59	17	>sp|O15031|PLXB2_HUMAN Plexin-B2 OS=Homo sapiens GN=PLXNB2 PE=1 SV=3	13257	YJC_160818_PC9mem_AALmnp_G_01.8535.8535.4	controllerType=0 controllerNumber=1 scan=8535	56.0524
10002:4	72	R.TEAGAFEYVPDPTFEN[+2205.793]FTGGVKK.Q	HexNAc(4)Hex(5)Fuc(2)NeuAc(1)	N[+2206]	1178.25	4	4709.99	4709.99	0	-1.1	1084	Specific	238.29	114.27	17.69	3.96	17	>sp|O15031|PLXB2_HUMAN Plexin-B2 OS=Homo sapiens GN=PLXNB2 PE=1 SV=3	13257	YJC_160818_PC9mem_AALmnp_G_01.8703.8703.4	controllerType=0 controllerNumber=1 scan=8703	57.0828
09452:3	72	R.TEAGAFEYVPDPTFEN[+2060.755]FTGGVKK.Q	HexNAc(4)Hex(5)Fuc(3)	N[+2061]	1522.66	3	4565.96	4564.95	1	0.8	1084	Specific	341.16	281.65	281.65	5.42	17	>sp|O15031|PLXB2_HUMAN Plexin-B2 OS=Homo sapiens GN=PLXNB2 PE=1 SV=3	13257	YJC_160818_PC9mem_AALmnp_G_01.8255.8255.3	controllerType=0 controllerNumber=1 scan=8255	54.4472
09998:3	72	R.TEAGAFEYVPDPTFEN[+2205.793]FTGGVKK.Q	HexNAc(4)Hex(5)Fuc(2)NeuAc(1)	N[+2206]	1570.66	3	4709.97	4709.99	0	-5	1084	Specific	456.48	316.98	1.39	5.86	17	>sp|O15031|PLXB2_HUMAN Plexin-B2 OS=Homo sapiens GN=PLXNB2 PE=1 SV=3	13257	YJC_160818_PC9mem_AALmnp_G_01.8698.8698.3	controllerType=0 controllerNumber=1 scan=8698	57.0561
09537:3	72	R.TEAGAFEYVPDPTFEN[+1710.598]FTGGVKK.Q	HexNAc(3)Hex(5)NeuAc(1)	N[+1711]	1405.95	3	4215.82	4214.8	1	5.7	1084	Specific	606.3	479.84	479.84	9.42	17	>sp|O15031|PLXB2_HUMAN Plexin-B2 OS=Homo sapiens GN=PLXNB2 PE=1 SV=3	13257	YJC_160818_PC9mem_AALmnp_G_01.8331.8331.3	controllerType=0 controllerNumber=1 scan=8331	54.9231
17900:5	72	K.TNSLPLRFWVNILKNPHFIFDVHVHEVVDASLSVIAQTFMDAC[+57.021]TR.T		C[+57]	1048.34	5	5237.68	5237.68	0	0	1681	Specific	299	250.04	44.19	3.91	17	>sp|O15031|PLXB2_HUMAN Plexin-B2 OS=Homo sapiens GN=PLXNB2 PE=1 SV=3	13257	YJC_160818_PC9mem_AALmnp_G_01.15798.15798.5	controllerType=0 controllerNumber=1 scan=15798	100.756
14471:6	73	K.VTSEELHYFVQNHFTSARMALIGLGVSHPVLKQVAEQFLNMR.G			800.416	6	4797.46	4797.48	0	-3.1	200	Specific	471.58	409.43	63.39	6.13	7	>sp|P22695|QCR2_HUMAN Cytochrome b-c1 complex subunit 2, mitochondrial OS=Homo sapiens GN=UQCRC2 PE=1 SV=3	13957	YJC_160818_PC9mem_AALmnp_G_01.12573.12573.6	controllerType=0 controllerNumber=1 scan=12573	80.2234
16803:5	73	R.GGEIREQNGDSLVHAAFVAESAVAGSAEANAFSVLQHVLGAGPHVK.R			920.469	5	4598.32	4597.32	1	-1.1	255	Specific	645.51	645.51	212.36	9.38	7	>sp|P22695|QCR2_HUMAN Cytochrome b-c1 complex subunit 2, mitochondrial OS=Homo sapiens GN=UQCRC2 PE=1 SV=3	13957	YJC_160818_PC9mem_AALmnp_G_01.14828.14828.5	controllerType=0 controllerNumber=1 scan=14828	94.4718
17427:6	73	R.GGEIREQN[+0.984]GDSLVHAAFVAESAVAGSAEANAFSVLQHVLGAGPHVK.R		N[+1]	767.222	6	4598.3	4598.3	0	-0.9	255	Specific	333.62	116.43	1.27	3.62	7	>sp|P22695|QCR2_HUMAN Cytochrome b-c1 complex subunit 2, mitochondrial OS=Homo sapiens GN=UQCRC2 PE=1 SV=3	13957	YJC_160818_PC9mem_AALmnp_G_01.15375.15375.6	controllerType=0 controllerNumber=1 scan=15375	98.0012
16801:5	73	R.GGEIREQN[+0.984]GDSLVHAAFVAESAVAGSAEANAFSVLQHVLGAGPHVK.R		N[+1]	920.469	5	4598.32	4598.3	0	3.1	255	Specific	391.54	157.77	14.61	3.4	7	>sp|P22695|QCR2_HUMAN Cytochrome b-c1 complex subunit 2, mitochondrial OS=Homo sapiens GN=UQCRC2 PE=1 SV=3	13957	YJC_160818_PC9mem_AALmnp_G_01.14827.14827.5	controllerType=0 controllerNumber=1 scan=14827	94.4678
17421:5	73	R.GGEIREQ[+0.984]NGDSLVHAAFVAESAVAGSAEANAFSVLQHVLGAGPHVK.R		Q[+1]	920.466	5	4598.3	4598.3	0	-0.7	255	Specific	460.27	212.94	7.96	4.3	7	>sp|P22695|QCR2_HUMAN Cytochrome b-c1 complex subunit 2, mitochondrial OS=Homo sapiens GN=UQCRC2 PE=1 SV=3	13957	YJC_160818_PC9mem_AALmnp_G_01.15370.15370.5	controllerType=0 controllerNumber=1 scan=15370	97.974
17423:5	73	R.GGEIREQN[+0.984]GDSLVHAAFVAESAVAGSAEANAFSVLQHVLGAGPHVK.R		N[+1]	920.466	5	4598.3	4598.3	0	-0.7	255	Specific	691.21	691.21	0	10.34	7	>sp|P22695|QCR2_HUMAN Cytochrome b-c1 complex subunit 2, mitochondrial OS=Homo sapiens GN=UQCRC2 PE=1 SV=3	13957	YJC_160818_PC9mem_AALmnp_G_01.15371.15371.5	controllerType=0 controllerNumber=1 scan=15371	97.977
17429:6	73	R.GGEIREQN[+0.984]GDSLVHAAFVAESAVAGSAEANAFSVLQHVLGAGPHVK.R		N[+1]	767.222	6	4598.3	4598.3	0	-0.9	255	Specific	933.13	933.13	16.12	15.6	7	>sp|P22695|QCR2_HUMAN Cytochrome b-c1 complex subunit 2, mitochondrial OS=Homo sapiens GN=UQCRC2 PE=1 SV=3	13957	YJC_160818_PC9mem_AALmnp_G_01.15376.15376.6	controllerType=0 controllerNumber=1 scan=15376	98.0041
18071:5	73	R.EQ[+0.984]NGDSLVHAAFVAESAVAGSAEANAFSVLQHVLGAGPHVK.R		Q[+1]	818.01	5	4086.02	4086.03	0	-3.1	260	Specific	252.03	12.29	0	0.99	7	>sp|P22695|QCR2_HUMAN Cytochrome b-c1 complex subunit 2, mitochondrial OS=Homo sapiens GN=UQCRC2 PE=1 SV=3	13957	YJC_160818_PC9mem_AALmnp_G_01.15960.15960.5	controllerType=0 controllerNumber=1 scan=15960	101.826
[truncated: 1,452 more rows]

## Sheet: PC9_AAL_Raw List 2
Query #:z	Protein Rank	Peptide < ProteinMetrics Confidential >	Glycans NHFAGNa	Modification Type(s)	Observed m/z	z	Observed (M+H)	Calc. mass (M+H)	Off-by-x error	Mass error (ppm)	Starting position	Cleavage	Score	Delta	Delta Mod	|Log Prob|	# of unique peptides	Protein Name	Protein DB number	Comment	Scan #	Scan Time
[truncated: 2,599 more rows]

[truncated: 6 more sheets: PC9_AAL GP List 1, PC9_AAL GP List 2, PC9_AAL Unique Count List, PC9_AAL Fucosylated GP List, Unique Count Fucosylated GP, Non-GP]
